# Supplementary material for: Transcriptomics Analysis of Wheat Tassel Response to Tilletia laevis Kühn, Which Causes Common Bunt of Wheat
Source: Front Plant Sci. 2022 Feb 22;13:823907. doi: 10.3389/fpls.2022.823907 (PMC8902468; doi:10.3389/fpls.2022.823907)
Supplement: Supplementary file 3 [file Table_3.xlsx]

## Sheet: KEGG enrichment analysis
Table S3. KEGG pathway analysis in T. foetida infected and control plants
Number	id	term	ListHits	ListTotal	PopHits	PopTotal	pval	padj	Enrichment_score	Gene
1	ko00630	Glyoxylate and dicarboxylate metabolism	98	3109	231	19303	2.92e-22	5.83e-20	2.63401	TraesCS1B02G084700; TraesCS1B02G131300; TraesCS1B02G363100; TraesCS1D02G109600; TraesCS1D02G351500; TraesCS2A02G066700; TraesCS2A02G066800; TraesCS2A02G066900; TraesCS2A02G067100; TraesCS2A02G067200; TraesCS2A02G067300; TraesCS2A02G130600; TraesCS2A02G168400; TraesCS2A02G250800; TraesCS2A02G261600; TraesCS2A02G345500; TraesCS2A02G467700; TraesCS2A02G467900; TraesCS2A02G500400; TraesCS2B02G049200;…
2	ko01200	Carbon metabolism	223	3109	796	19303	1.45e-18	1.45e-16	1.73939	TraesCS1A02G122500; TraesCS1A02G122800; TraesCS1A02G210300; TraesCS1A02G253200; TraesCS1A02G313300; TraesCS1B02G084700; TraesCS1B02G131300; TraesCS1B02G141700; TraesCS1B02G142000; TraesCS1B02G206000; TraesCS1B02G325100; TraesCS1B02G363100; TraesCS1D02G109600; TraesCS1D02G123400; TraesCS1D02G123700; TraesCS1D02G274000; TraesCS1D02G313800; TraesCS1D02G346200; TraesCS1D02G351500; TraesCS2A02G041100;…
3	ko01230	Biosynthesis of amino acids	202	3109	713	19303	1.65e-17	1.1e-15	1.759	TraesCS1A02G313300; TraesCS1A02G428400; TraesCS1B02G089000; TraesCS1B02G090600; TraesCS1B02G222500; TraesCS1B02G325100; TraesCS1B02G463100; TraesCS1D02G073000; TraesCS1D02G074600; TraesCS1D02G211700; TraesCS1D02G270500; TraesCS1D02G313800; TraesCS1D02G346200; TraesCS2A02G035700; TraesCS2A02G261600; TraesCS2A02G291900; TraesCS2A02G292000; TraesCS2A02G382700; TraesCS2A02G415800; TraesCS2A02G500400;…
4	ko00500	Starch and sucrose metabolism	217	3109	803	19303	3.5e-16	1.75e-14	1.67783	TraesCS1A02G122800; TraesCS1A02G215500; TraesCS1A02G229300; TraesCS1A02G263900; TraesCS1A02G338200; TraesCS1A02G419600; TraesCS1B02G142000; TraesCS1B02G197900; TraesCS1B02G198900; TraesCS1B02G229000; TraesCS1B02G390000; TraesCS1B02G449700; TraesCS1D02G123700; TraesCS1D02G138100; TraesCS1D02G186500; TraesCS1D02G218000; TraesCS1D02G232700; TraesCS1D02G264000; TraesCS1D02G340400; TraesCS1D02G341100;…
5	ko00196	Photosynthesis - antenna proteins	47	3109	93	19303	2.45e-15	9.79e-14	3.13775	TraesCS1A02G403300; TraesCS1B02G317500; TraesCS1B02G388200; TraesCS1B02G432700; TraesCS1B02G433300; TraesCS1B02G451100; TraesCS1D02G375100; TraesCS1D02G411300; TraesCS1D02G428200; TraesCS2A02G187200; TraesCS2A02G204800; TraesCS2A02G206200; TraesCS2A02G342600; TraesCS2B02G220100; TraesCS2B02G233400; TraesCS2D02G200700; TraesCS2D02G209900; TraesCS4A02G226900; TraesCS4B02G089500; TraesCS4D02G086400;…
6	ko00071	Fatty acid degradation	61	3109	142	19303	6.36e-15	2.12e-13	2.66714	TraesCS1A02G075000; TraesCS1A02G110300; TraesCS1A02G143900; TraesCS1A02G370100; TraesCS1B02G129300; TraesCS1B02G389200; TraesCS1D02G052200; TraesCS1D02G111900; TraesCS1D02G376300; TraesCS2A02G109700; TraesCS2A02G388900; TraesCS2B02G049200; TraesCS2B02G127700; TraesCS2B02G189700; TraesCS3A02G086700; TraesCS3A02G237700; TraesCS3B02G008700; TraesCS3B02G102100; TraesCS3B02G266100; TraesCS3D02G005500;…
7	ko00592	alpha-Linolenic acid metabolism	82	3109	224	19303	1.92e-14	5.48e-13	2.27285	TraesCS1A02G110300; TraesCS1A02G143900; TraesCS1A02G370100; TraesCS1B02G129300; TraesCS1B02G389200; TraesCS1D02G013700; TraesCS1D02G111900; TraesCS1D02G376300; TraesCS2A02G311200; TraesCS2A02G315100; TraesCS2B02G040000; TraesCS2B02G328100; TraesCS2B02G333600; TraesCS2D02G313400; TraesCS3A02G086700; TraesCS3A02G303600; TraesCS3B02G102100; TraesCS3B02G332700; TraesCS3B02G445100; TraesCS3B02G549000;…
8	ko00710	Carbon fixation in photosynthetic organisms	84	3109	238	19303	1.05e-13	2.62e-12	2.19132	TraesCS1A02G122500; TraesCS1A02G253200; TraesCS1A02G313300; TraesCS1B02G141700; TraesCS1B02G325100; TraesCS1B02G363100; TraesCS1D02G123400; TraesCS1D02G274000; TraesCS1D02G313800; TraesCS1D02G351500; TraesCS2A02G066700; TraesCS2A02G066800; TraesCS2A02G066900; TraesCS2A02G067100; TraesCS2A02G067200; TraesCS2A02G067300; TraesCS2A02G261600; TraesCS2B02G078900; TraesCS2B02G079100; TraesCS2B02G079200;…
9	ko04140	Regulation of autophagy	46	3109	99	19303	2.72e-13	6.04e-12	2.88487	TraesCS1A02G220200; TraesCS1A02G333800; TraesCS1B02G098600; TraesCS1B02G347100; TraesCS2A02G224000; TraesCS2A02G468300; TraesCS2A02G584900; TraesCS2B02G175800; TraesCS2B02G274200; TraesCS2B02G404900; TraesCS2B02G491200; TraesCS2D02G155700; TraesCS2D02G229900; TraesCS2D02G384600; TraesCS2D02G601400; TraesCS3B02G250900; TraesCS3B02G316500; TraesCS3B02G544300; TraesCS3B02G544400; TraesCS3B02G544700;…
10	ko00280	Valine, leucine and isoleucine degradation	53	3109	126	19303	8.74e-13	1.75e-11	2.61162	TraesCS1A02G066800; TraesCS1A02G143900; TraesCS1A02G210300; TraesCS1A02G299100; TraesCS1B02G084700; TraesCS1B02G085100; TraesCS1B02G131300; TraesCS1B02G206000; TraesCS1B02G222500; TraesCS1B02G308900; TraesCS1D02G067800; TraesCS1D02G109600; TraesCS1D02G211700; TraesCS1D02G292100; TraesCS2A02G074700; TraesCS2A02G109700; TraesCS2A02G388900; TraesCS2B02G049200; TraesCS2B02G127700; TraesCS2D02G073400;…
11	ko00052	Galactose metabolism	96	3109	313	19303	3.09e-11	5.62e-10	1.90428	TraesCS1A02G122800; TraesCS1A02G358800; TraesCS1A02G443900; TraesCS1B02G142000; TraesCS1B02G478400; TraesCS1D02G123700; TraesCS1D02G162000; TraesCS1D02G346200; TraesCS2A02G105900; TraesCS2A02G180200; TraesCS2A02G295400; TraesCS2A02G343600; TraesCS2A02G343900; TraesCS2A02G386100; TraesCS2A02G488900; TraesCS2A02G588300; TraesCS2B02G122900; TraesCS2B02G311900; TraesCS2B02G341200; TraesCS2B02G341400;…
12	ko00400	Phenylalanine, tyrosine and tryptophan biosynthesis	53	3109	140	19303	1.18e-10	1.96e-09	2.35045	TraesCS1A02G428400; TraesCS1B02G089000; TraesCS1B02G463100; TraesCS1D02G073000; TraesCS1D02G270500; TraesCS2A02G291900; TraesCS2A02G292000; TraesCS2A02G523400; TraesCS2B02G308400; TraesCS2B02G308500; TraesCS2D02G289900; TraesCS2D02G290000; TraesCS3A02G041800; TraesCS3B02G041900; TraesCS3B02G331100; TraesCS3D02G038500; TraesCS4A02G089800; TraesCS4A02G145400; TraesCS4B02G124800; TraesCS4B02G197700;…
13	ko04068	FoxO signaling pathway	62	3109	176	19303	1.41e-10	2.17e-09	2.18717	TraesCS1A02G264900; TraesCS1A02G308900; TraesCS1A02G309800; TraesCS1A02G333800; TraesCS1B02G098600; TraesCS1B02G275600; TraesCS1B02G320900; TraesCS1B02G321000; TraesCS1B02G347100; TraesCS1D02G265100; TraesCS1D02G309300; TraesCS2A02G098000; TraesCS2A02G224000; TraesCS2A02G404800; TraesCS2A02G468300; TraesCS2B02G175800; TraesCS2B02G274200; TraesCS2B02G422800; TraesCS2B02G491200; TraesCS2D02G155700;…
14	ko04146	Peroxisome	88	3109	287	19303	1.92e-10	2.75e-09	1.90373	TraesCS1A02G075000; TraesCS1A02G110300; TraesCS1A02G143900; TraesCS1A02G183800; TraesCS1B02G125400; TraesCS1B02G129300; TraesCS1B02G205300; TraesCS1D02G107000; TraesCS1D02G111900; TraesCS1D02G192900; TraesCS2A02G168400; TraesCS2A02G171600; TraesCS2A02G250800; TraesCS2A02G422500; TraesCS2A02G467700; TraesCS2A02G581000; TraesCS2B02G198100; TraesCS2B02G264100; TraesCS2B02G441000; TraesCS2B02G490700;…
15	ko00030	Pentose phosphate pathway	57	3109	162	19303	7.44e-10	9.91e-09	2.18456	TraesCS1D02G274000; TraesCS1D02G346200; TraesCS2A02G320400; TraesCS2B02G362700; TraesCS3A02G107600; TraesCS3A02G242400; TraesCS3A02G277700; TraesCS3A02G377600; TraesCS3A02G439800; TraesCS3B02G025200; TraesCS3B02G126400; TraesCS3B02G270400; TraesCS3B02G311900; TraesCS3B02G410400; TraesCS3B02G473800; TraesCS3B02G565200; TraesCS3D02G109600; TraesCS3D02G278000; TraesCS3D02G370700; TraesCS3D02G432600;…
16	ko00350	Tyrosine metabolism	65	3109	195	19303	7.96e-10	9.95e-09	2.06958	TraesCS1A02G050200; TraesCS1A02G329500; TraesCS1A02G370100; TraesCS1B02G066500; TraesCS1B02G066600; TraesCS1B02G089000; TraesCS1B02G389200; TraesCS1D02G052200; TraesCS1D02G052500; TraesCS1D02G073000; TraesCS1D02G270500; TraesCS1D02G376300; TraesCS2A02G516500; TraesCS2A02G516800; TraesCS2B02G189700; TraesCS2B02G491000; TraesCS2B02G491100; TraesCS2B02G491400; TraesCS2B02G545200; TraesCS2B02G545300;…
17	ko04075	Plant hormone signal transduction	218	3109	933	19303	1.45e-09	1.71e-08	1.4507	TraesCS1A02G077800; TraesCS1A02G118400; TraesCS1A02G126800; TraesCS1A02G193200; TraesCS1A02G203400; TraesCS1A02G270800; TraesCS1A02G278400; TraesCS1A02G413800; TraesCS1A02G425100; TraesCS1B02G095900; TraesCS1B02G119100; TraesCS1B02G127000; TraesCS1B02G145800; TraesCS1B02G192300; TraesCS1B02G201800; TraesCS1B02G208000; TraesCS1B02G217500; TraesCS1B02G265900; TraesCS1B02G287300; TraesCS1B02G356600;…
18	ko00360	Phenylalanine metabolism	61	3109	183	19303	2.46e-09	2.73e-08	2.06958	TraesCS1B02G048300; TraesCS1B02G048400; TraesCS1B02G048500; TraesCS1B02G089000; TraesCS1B02G122800; TraesCS1D02G039400; TraesCS1D02G039500; TraesCS1D02G073000; TraesCS1D02G103500; TraesCS1D02G270500; TraesCS2A02G145800; TraesCS2A02G212900; TraesCS2A02G380900; TraesCS2A02G381000; TraesCS2A02G381100; TraesCS2B02G224000; TraesCS2B02G224300; TraesCS2B02G398200; TraesCS2B02G398400; TraesCS2D02G026300;…
19	ko00650	Butanoate metabolism	30	3109	67	19303	6.58e-09	6.93e-08	2.78004	TraesCS2A02G421400; TraesCS2B02G049200; TraesCS2B02G440400; TraesCS2D02G313500; TraesCS2D02G418400; TraesCS3A02G205100; TraesCS3B02G008700; TraesCS3B02G237200; TraesCS3B02G357200; TraesCS3D02G005500; TraesCS3D02G189400; TraesCS3D02G321200; TraesCS4A02G075600; TraesCS4A02G262600; TraesCS4B02G052300; TraesCS4B02G231400; TraesCS4D02G052500; TraesCS4D02G232700; TraesCS5A02G137700; TraesCS6A02G155500;…
20	ko00480	Glutathione metabolism	121	3109	462	19303	7.93e-09	7.93e-08	1.6261	TraesCS1A02G072000; TraesCS1A02G078800; TraesCS1A02G095800; TraesCS1A02G186100; TraesCS1A02G186400; TraesCS1A02G186800; TraesCS1A02G187000; TraesCS1B02G090500; TraesCS1B02G127900; TraesCS1B02G194600; TraesCS1B02G194900; TraesCS1D02G074500; TraesCS1D02G189600; TraesCS1D02G189700; TraesCS1D02G189800; TraesCS1D02G190000; TraesCS1D02G190200; TraesCS1D02G191100; TraesCS2A02G045400; TraesCS2A02G071700;…
21	ko00270	Cysteine and methionine metabolism	93	3109	336	19303	2.13e-08	2.03e-07	1.71849	TraesCS1A02G072000; TraesCS1A02G089600; TraesCS1A02G181000; TraesCS1A02G299100; TraesCS1B02G089000; TraesCS1B02G090500; TraesCS1B02G117500; TraesCS1B02G199600; TraesCS1B02G222500; TraesCS1B02G308900; TraesCS1B02G363100; TraesCS1D02G073000; TraesCS1D02G074500; TraesCS1D02G098100; TraesCS1D02G211700; TraesCS1D02G292100; TraesCS1D02G351500; TraesCS2A02G076600; TraesCS2A02G235900; TraesCS2A02G355400;…
22	ko00591	Linoleic acid metabolism	31	3109	74	19303	2.88e-08	2.61e-07	2.60096	TraesCS2A02G315100; TraesCS2A02G525500; TraesCS2B02G333600; TraesCS2B02G555400; TraesCS2D02G313400; TraesCS3A02G303600; TraesCS3B02G332700; TraesCS3D02G298200; TraesCS4A02G009400; TraesCS4A02G275900; TraesCS4B02G037700; TraesCS4B02G037800; TraesCS4B02G037900; TraesCS4B02G295200; TraesCS4D02G035100; TraesCS4D02G035200; TraesCS4D02G294100; TraesCS5A02G378700; TraesCS5A02G378900; TraesCS5A02G465200;…
23	ko00950	Isoquinoline alkaloid biosynthesis	42	3109	120	19303	1.09e-07	9.5e-07	2.17306	TraesCS1A02G050200; TraesCS1A02G329500; TraesCS1B02G066500; TraesCS1B02G066600; TraesCS1B02G089000; TraesCS1D02G052500; TraesCS1D02G073000; TraesCS1D02G270500; TraesCS2A02G516500; TraesCS2A02G516800; TraesCS2B02G491000; TraesCS2B02G491100; TraesCS2B02G491400; TraesCS2B02G545200; TraesCS2B02G545300; TraesCS2D02G075000; TraesCS2D02G335300; TraesCS2D02G468200; TraesCS2D02G468600; TraesCS2D02G518200;…
24	ko00590	Arachidonic acid metabolism	22	3109	48	19303	2.64e-07	2.2e-06	2.84568	TraesCS2B02G340500; TraesCS2B02G429100; TraesCS2B02G604800; TraesCS2D02G407700; TraesCS2D02G598000; TraesCS3A02G303600; TraesCS3B02G090400; TraesCS3B02G332700; TraesCS3D02G298200; TraesCS4A02G412100; TraesCS4B02G312300; TraesCS4D02G309900; TraesCS5A02G465200; TraesCS5B02G477000; TraesCS5B02G487400; TraesCS5D02G477800; TraesCS6A02G246400; TraesCS6B02G278100; TraesCS6D02G228800; TraesCS7A02G150500;…
25	ko00410	beta-Alanine metabolism	40	3109	123	19303	1.89e-06	1.52e-05	2.01911	TraesCS1A02G210300; TraesCS1B02G206000; TraesCS2A02G109700; TraesCS2A02G388900; TraesCS2A02G467300; TraesCS2A02G548200; TraesCS2B02G127700; TraesCS2B02G490100; TraesCS2D02G075000; TraesCS2D02G313500; TraesCS2D02G335300; TraesCS2D02G467300; TraesCS2D02G549300; TraesCS4A02G075600; TraesCS4A02G219900; TraesCS4A02G262600; TraesCS4B02G052300; TraesCS4B02G098300; TraesCS4B02G231400; TraesCS4D02G052500;…
26	ko00260	Glycine, serine and threonine metabolism	63	3109	227	19303	2.72e-06	2.09e-05	1.72313	TraesCS1A02G299100; TraesCS1A02G428400; TraesCS1B02G084700; TraesCS1B02G131300; TraesCS1B02G308900; TraesCS1B02G463100; TraesCS1D02G109600; TraesCS1D02G292100; TraesCS2A02G261600; TraesCS2A02G382700; TraesCS2A02G415800; TraesCS2A02G467900; TraesCS2B02G280600; TraesCS2B02G400000; TraesCS2B02G490900; TraesCS2B02G494300; TraesCS2D02G075000; TraesCS2D02G262400; TraesCS2D02G335300; TraesCS2D02G379000;…
27	ko00010	Glycolysis / Gluconeogenesis	104	3109	427	19303	3.33e-06	2.46e-05	1.5122	TraesCS1A02G122800; TraesCS1A02G313300; TraesCS1A02G370100; TraesCS1A02G409900; TraesCS1B02G084700; TraesCS1B02G131300; TraesCS1B02G142000; TraesCS1B02G325100; TraesCS1B02G389200; TraesCS1D02G052200; TraesCS1D02G109600; TraesCS1D02G123700; TraesCS1D02G274000; TraesCS1D02G313800; TraesCS1D02G346200; TraesCS1D02G376300; TraesCS2A02G076600; TraesCS2A02G180200; TraesCS2A02G343600; TraesCS2A02G343900;…
28	ko03030	DNA replication	47	3109	167	19303	2.65e-05	0.000189444	1.74737	TraesCS1A02G129400; TraesCS1A02G172100; TraesCS1A02G227700; TraesCS1A02G264000; TraesCS1A02G299500; TraesCS1B02G146200; TraesCS1B02G156600; TraesCS1B02G242000; TraesCS1B02G274600; TraesCS1B02G309300; TraesCS1D02G125300; TraesCS1D02G139000; TraesCS1D02G172600; TraesCS1D02G229400; TraesCS1D02G264100; TraesCS1D02G298400; TraesCS2A02G364000; TraesCS2B02G382000; TraesCS2D02G361800; TraesCS3A02G172400;…
29	ko00330	Arginine and proline metabolism	51	3109	189	19303	4.61e-05	0.000318268	1.67538	TraesCS1A02G333700; TraesCS1B02G018200; TraesCS1B02G374500; TraesCS1D02G362700; TraesCS2A02G035700; TraesCS2A02G071200; TraesCS2A02G355400; TraesCS2A02G388900; TraesCS2A02G467300; TraesCS2A02G548200; TraesCS2B02G048700; TraesCS2B02G372900; TraesCS2B02G490100; TraesCS2D02G026300; TraesCS2D02G026900; TraesCS2D02G034900; TraesCS2D02G467300; TraesCS2D02G549300; TraesCS3A02G363700; TraesCS3B02G331100;…
30	ko00051	Fructose and mannose metabolism	56	3109	214	19303	5.58e-05	0.000368513	1.62472	TraesCS1A02G122800; TraesCS1B02G142000; TraesCS1D02G123700; TraesCS1D02G274000; TraesCS1D02G346200; TraesCS2A02G117300; TraesCS2D02G117900; TraesCS3A02G107600; TraesCS3A02G241000; TraesCS3A02G274200; TraesCS3A02G277700; TraesCS3A02G286200; TraesCS3A02G377600; TraesCS3A02G480900; TraesCS3B02G025200; TraesCS3B02G126400; TraesCS3B02G311900; TraesCS3B02G392000; TraesCS3B02G410400; TraesCS3B02G525400;…
31	ko04150	mTOR signaling pathway	49	3109	181	19303	5.71e-05	0.000368513	1.68082	TraesCS1A02G077200; TraesCS1A02G264900; TraesCS1A02G333800; TraesCS1A02G407700; TraesCS1B02G095200; TraesCS1B02G098600; TraesCS1B02G275600; TraesCS1B02G347100; TraesCS1D02G079300; TraesCS1D02G265100; TraesCS2B02G175800; TraesCS2D02G155700; TraesCS3A02G201100; TraesCS3A02G223900; TraesCS3A02G238700; TraesCS3A02G250500; TraesCS3B02G224800; TraesCS3B02G267400; TraesCS3B02G280000; TraesCS3B02G316500;…
32	ko00680	Methane metabolism	49	3109	183	19303	7.75e-05	0.000484493	1.66245	TraesCS1D02G274000; TraesCS1D02G346200; TraesCS2B02G189700; TraesCS2D02G493600; TraesCS3A02G107600; TraesCS3A02G146800; TraesCS3A02G277700; TraesCS3A02G306700; TraesCS3A02G341000; TraesCS3A02G377600; TraesCS3A02G385600; TraesCS3B02G025200; TraesCS3B02G126400; TraesCS3B02G168000; TraesCS3B02G311900; TraesCS3B02G329800; TraesCS3B02G410400; TraesCS3B02G417800; TraesCS3D02G109600; TraesCS3D02G278000;…
33	ko00860	Porphyrin and chlorophyll metabolism	43	3109	158	19303	0.000126187	0.00076477	1.68972	TraesCS1A02G171000; TraesCS1A02G224700; TraesCS1B02G186300; TraesCS1D02G168700; TraesCS1D02G226100; TraesCS2A02G134000; TraesCS2A02G426900; TraesCS2B02G157600; TraesCS2B02G366300; TraesCS2D02G136200; TraesCS3B02G119400; TraesCS3B02G179100; TraesCS3B02G254400; TraesCS3D02G194300; TraesCS4A02G002800; TraesCS4A02G140700; TraesCS4A02G420600; TraesCS4B02G009600; TraesCS4B02G311100; TraesCS4D02G053400;…
34	ko00903	Limonene and pinene degradation	11	3109	25	19303	0.000196337	0.00115492	2.73185	TraesCS2A02G292400; TraesCS2A02G388900; TraesCS2D02G290300; TraesCS4A02G219900; TraesCS4B02G098300; TraesCS4D02G094500; TraesCS6B02G284600; TraesCS6B02G284900; TraesCS7A02G210100; TraesCS7B02G116800; TraesCS7D02G211900
35	ko00290	Valine, leucine and isoleucine biosynthesis	18	3109	51	19303	0.000209834	0.00119905	2.19132	TraesCS1B02G222500; TraesCS1D02G211700; TraesCS2D02G589000; TraesCS4A02G059800; TraesCS4B02G235400; TraesCS4D02G236800; TraesCS5A02G131300; TraesCS5B02G133500; TraesCS5D02G027400; TraesCS6A02G218300; TraesCS6A02G288000; TraesCS6B02G087100; TraesCS6B02G087200; TraesCS6B02G247900; TraesCS6D02G201500; TraesCS7A02G280700; TraesCS7B02G180500; TraesCS7D02G279300
36	ko04145	Phagosome	69	3109	289	19303	0.00021754	0.00120855	1.48237	TraesCS1A02G019000; TraesCS1A02G258800; TraesCS1A02G309700; TraesCS1A02G333600; TraesCS1B02G269400; TraesCS1B02G320800; TraesCS1B02G337200; TraesCS1B02G347000; TraesCS1D02G309200; TraesCS1D02G336200; TraesCS2A02G185500; TraesCS2A02G559200; TraesCS2B02G221800; TraesCS2D02G160700; TraesCS2D02G202200; TraesCS2D02G571300; TraesCS3A02G154600; TraesCS3A02G201100; TraesCS3A02G210400; TraesCS3A02G238700;…
37	ko04550	Signaling pathways regulating pluripotency of stem cells	8	3109	16	19303	0.000278616	0.00147989	3.10437	TraesCS1A02G077200; TraesCS1A02G407700; TraesCS1B02G095200; TraesCS1D02G079300; TraesCS2D02G400400; TraesCS4A02G345500; TraesCS5B02G529300; TraesCS5D02G528400
38	ko04540	Gap junction	18	3109	52	19303	0.000281179	0.00147989	2.14918	TraesCS1A02G258800; TraesCS1A02G309700; TraesCS1B02G269400; TraesCS1B02G320800; TraesCS1D02G309200; TraesCS2A02G185500; TraesCS2B02G221800; TraesCS2D02G202200; TraesCS4A02G257800; TraesCS4B02G056700; TraesCS4B02G366500; TraesCS4D02G015400; TraesCS4D02G057000; TraesCS5A02G407800; TraesCS5A02G416400; TraesCS5A02G443500; TraesCS5D02G424100; TraesCS6D02G130500
39	ko00520	Amino sugar and nucleotide sugar metabolism	104	3109	474	19303	0.000305684	0.00156761	1.36226	TraesCS1A02G045400; TraesCS1A02G122800; TraesCS1A02G259800; TraesCS1A02G419600; TraesCS1A02G443900; TraesCS1B02G142000; TraesCS1B02G253500; TraesCS1B02G260600; TraesCS1B02G270100; TraesCS1B02G390000; TraesCS1B02G449700; TraesCS1B02G478400; TraesCS1D02G046100; TraesCS1D02G123700; TraesCS1D02G241800; TraesCS1D02G249600; TraesCS1D02G305400; TraesCS1D02G427400; TraesCS2A02G103200; TraesCS2A02G210100;…
40	ko00250	Alanine, aspartate and glutamate metabolism	43	3109	165	19303	0.000361186	0.00180593	1.61804	TraesCS1A02G299100; TraesCS1B02G308900; TraesCS1B02G374500; TraesCS1D02G292100; TraesCS1D02G362700; TraesCS2A02G261600; TraesCS2A02G389900; TraesCS2A02G421400; TraesCS2A02G500400; TraesCS2B02G280600; TraesCS2B02G409300; TraesCS2B02G440400; TraesCS2B02G528300; TraesCS2D02G262400; TraesCS2D02G313500; TraesCS2D02G388800; TraesCS2D02G418400; TraesCS2D02G500600; TraesCS3A02G266300; TraesCS3B02G331100;…
41	ko00910	Nitrogen metabolism	43	3109	168	19303	0.000548542	0.00267581	1.58914	TraesCS1B02G168600; TraesCS1D02G148000; TraesCS2A02G130600; TraesCS2A02G389900; TraesCS2A02G500400; TraesCS2B02G152900; TraesCS2B02G311300; TraesCS2B02G409300; TraesCS2B02G528300; TraesCS2D02G073500; TraesCS2D02G292600; TraesCS2D02G388800; TraesCS2D02G500600; TraesCS3A02G230000; TraesCS3A02G254000; TraesCS3A02G266300; TraesCS3A02G301100; TraesCS3B02G259300; TraesCS3D02G223300; TraesCS3D02G266400;…
42	ko01210	2-Oxocarboxylic acid metabolism	47	3109	188	19303	0.000588334	0.00280159	1.55219	TraesCS1B02G090600; TraesCS1B02G222500; TraesCS1D02G074600; TraesCS1D02G211700; TraesCS2A02G261600; TraesCS2B02G280600; TraesCS2D02G262400; TraesCS2D02G589000; TraesCS3A02G442100; TraesCS3B02G331100; TraesCS3B02G475900; TraesCS3D02G434800; TraesCS4A02G059800; TraesCS4A02G337800; TraesCS4B02G235400; TraesCS4B02G335100; TraesCS4D02G236800; TraesCS5A02G059300; TraesCS5A02G131300; TraesCS5A02G413300;…
43	ko00053	Ascorbate and aldarate metabolism	34	3109	126	19303	0.000619678	0.00288222	1.67538	TraesCS2A02G071700; TraesCS2A02G388900; TraesCS2A02G437700; TraesCS2D02G434500; TraesCS3B02G426400; TraesCS4A02G219900; TraesCS4B02G098300; TraesCS4B02G197900; TraesCS4D02G094500; TraesCS5A02G132300; TraesCS5B02G132600; TraesCS5B02G210100; TraesCS5D02G218400; TraesCS5D02G309000; TraesCS6A02G071400; TraesCS6B02G095700; TraesCS6B02G284600; TraesCS6B02G284900; TraesCS6B02G462300; TraesCS6D02G397200;…
44	ko00300	Lysine biosynthesis	16	3109	48	19303	0.000875506	0.00397957	2.06958	TraesCS3A02G442100; TraesCS3B02G475900; TraesCS3D02G434800; TraesCS4A02G116000; TraesCS4A02G337800; TraesCS4B02G188200; TraesCS4D02G189600; TraesCS5A02G083200; TraesCS5B02G089300; TraesCS5B02G174600; TraesCS5B02G210100; TraesCS5D02G181600; TraesCS5D02G218400; TraesCS6A02G122300; TraesCS6B02G150600; TraesCS6D02G112400
45	ko04024	cAMP signaling pathway	45	3109	183	19303	0.00107603	0.00478236	1.52674	TraesCS1A02G110300; TraesCS1A02G308700; TraesCS1A02G333600; TraesCS1A02G435200; TraesCS1B02G128100; TraesCS1B02G129300; TraesCS1B02G242500; TraesCS1B02G337200; TraesCS1B02G347000; TraesCS1D02G111900; TraesCS1D02G308000; TraesCS1D02G336200; TraesCS1D02G402400; TraesCS3A02G154600; TraesCS3A02G425700; TraesCS3A02G425900; TraesCS3A02G426400; TraesCS3B02G180900; TraesCS3B02G462600; TraesCS3D02G421200;…
46	ko00310	Lysine degradation	33	3109	126	19303	0.00127676	0.00555111	1.6261	TraesCS1A02G042900; TraesCS1A02G308300; TraesCS1D02G043400; TraesCS1D02G307700; TraesCS2A02G041100; TraesCS2A02G388900; TraesCS2B02G049200; TraesCS2B02G053600; TraesCS3B02G008700; TraesCS3D02G005500; TraesCS3D02G433900; TraesCS3D02G450600; TraesCS4A02G023500; TraesCS4A02G070900; TraesCS4A02G219900; TraesCS4B02G098300; TraesCS4D02G094500; TraesCS5A02G197900; TraesCS5A02G276200; TraesCS5B02G210100;…
47	ko00980	Metabolism of xenobiotics by cytochrome P450	74	3109	335	19303	0.0015253	0.00643689	1.37148	TraesCS1A02G078800; TraesCS1A02G186100; TraesCS1A02G186400; TraesCS1A02G186800; TraesCS1A02G187000; TraesCS1B02G194600; TraesCS1B02G194900; TraesCS1D02G052200; TraesCS1D02G189600; TraesCS1D02G189700; TraesCS1D02G189800; TraesCS1D02G190000; TraesCS1D02G190200; TraesCS1D02G191100; TraesCS2A02G045400; TraesCS2A02G504300; TraesCS2A02G577900; TraesCS2B02G189700; TraesCS2D02G044100; TraesCS2D02G545400;…
48	ko04510	Focal adhesion	19	3109	63	19303	0.00154485	0.00643689	1.87248	TraesCS1A02G077200; TraesCS1A02G333600; TraesCS1A02G407700; TraesCS1B02G095200; TraesCS1B02G128100; TraesCS1B02G337200; TraesCS1B02G347000; TraesCS1D02G079300; TraesCS1D02G336200; TraesCS3A02G154600; TraesCS3B02G180900; TraesCS4A02G315000; TraesCS4A02G345500; TraesCS5B02G529300; TraesCS5B02G565000; TraesCS5D02G528400; TraesCS6B02G338000; TraesCS7A02G191400; TraesCS7D02G192400
49	ko00770	Pantothenate and CoA biosynthesis	22	3109	78	19303	0.00215741	0.00880574	1.75119	TraesCS1B02G222500; TraesCS1D02G211700; TraesCS4A02G059800; TraesCS4B02G235400; TraesCS4D02G236800; TraesCS5A02G284600; TraesCS5B02G283800; TraesCS5D02G292000; TraesCS6A02G098300; TraesCS6A02G218300; TraesCS6A02G288000; TraesCS6A02G299200; TraesCS6B02G087100; TraesCS6B02G087200; TraesCS6B02G247900; TraesCS6B02G328700; TraesCS6D02G084500; TraesCS6D02G201500; TraesCS6D02G278900; TraesCS7A02G280700;…
50	ko00564	Glycerophospholipid metabolism	73	3109	335	19303	0.00236781	0.00947125	1.35295	TraesCS1A02G016900; TraesCS1A02G113300; TraesCS1A02G196600; TraesCS1A02G227000; TraesCS1A02G381500; TraesCS1B02G021300; TraesCS1B02G211200; TraesCS1B02G233800; TraesCS1B02G241100; TraesCS1B02G242500; TraesCS1B02G373100; TraesCS1B02G388700; TraesCS1B02G404000; TraesCS1D02G016500; TraesCS1D02G081100; TraesCS1D02G114700; TraesCS1D02G200100; TraesCS1D02G228600; TraesCS1D02G312600; TraesCS1D02G389300;…
51	ko00100	Steroid biosynthesis	43	3109	180	19303	0.00244481	0.00958748	1.4832	TraesCS1A02G204700; TraesCS1D02G007100; TraesCS1D02G008900; TraesCS1D02G208000; TraesCS1D02G423500; TraesCS2A02G019900; TraesCS2B02G029200; TraesCS2B02G228600; TraesCS2D02G021600; TraesCS2D02G213700; TraesCS3A02G132000; TraesCS3A02G303600; TraesCS3B02G167400; TraesCS3B02G332700; TraesCS3D02G148300; TraesCS3D02G298200; TraesCS4A02G059900; TraesCS4A02G179800; TraesCS4A02G218400; TraesCS4B02G074800;…
52	ko04012	ErbB signaling pathway	9	3109	24	19303	0.00255692	0.00983432	2.32828	TraesCS1A02G077200; TraesCS1A02G407700; TraesCS1B02G095200; TraesCS1D02G079300; TraesCS4A02G345500; TraesCS4B02G170700; TraesCS4D02G172700; TraesCS5B02G529300; TraesCS5D02G528400
53	ko00620	Pyruvate metabolism	59	3109	264	19303	0.00297578	0.0112293	1.38756	TraesCS1A02G122500; TraesCS1A02G253200; TraesCS1B02G084700; TraesCS1B02G131300; TraesCS1B02G141700; TraesCS1B02G363100; TraesCS1D02G109600; TraesCS1D02G123400; TraesCS1D02G351500; TraesCS2A02G076600; TraesCS2A02G345500; TraesCS2A02G388900; TraesCS2B02G049200; TraesCS2D02G344200; TraesCS3A02G189300; TraesCS3A02G285900; TraesCS3A02G306700; TraesCS3B02G008700; TraesCS3B02G168000; TraesCS3B02G329800;…
54	ko00565	Ether lipid metabolism	25	3109	94	19303	0.00311504	0.0115372	1.65126	TraesCS1A02G227000; TraesCS1B02G241100; TraesCS1B02G242500; TraesCS1D02G228600; TraesCS3A02G303600; TraesCS3A02G492100; TraesCS3B02G332700; TraesCS3B02G552800; TraesCS3B02G553200; TraesCS3D02G298200; TraesCS3D02G499600; TraesCS4A02G347800; TraesCS4A02G369600; TraesCS4B02G015300; TraesCS4B02G377600; TraesCS5A02G337100; TraesCS5A02G465200; TraesCS5B02G336100; TraesCS5B02G477000; TraesCS5B02G525600;…
55	ko00130	Ubiquinone and other terpenoid-quinone biosynthesis	39	3109	163	19303	0.00347129	0.0126229	1.48553	TraesCS1A02G223300; TraesCS1A02G320500; TraesCS1B02G089000; TraesCS1B02G332700; TraesCS1D02G073000; TraesCS1D02G320300; TraesCS2A02G145800; TraesCS2D02G150400; TraesCS2D02G264400; TraesCS3A02G136100; TraesCS3A02G342900; TraesCS3B02G353000; TraesCS3B02G375100; TraesCS3D02G136900; TraesCS3D02G336900; TraesCS4A02G098900; TraesCS4A02G145400; TraesCS4A02G301600; TraesCS4B02G013100; TraesCS4B02G124800;…
56	ko00625	Chloroalkane and chloroalkene degradation	13	3109	41	19303	0.00359492	0.012839	1.96863	TraesCS1D02G052200; TraesCS2A02G388900; TraesCS2B02G189700; TraesCS4A02G219900; TraesCS4A02G406200; TraesCS4B02G098300; TraesCS4D02G094500; TraesCS6B02G284600; TraesCS6B02G284900; TraesCS6D02G371200; TraesCS7A02G210100; TraesCS7B02G116800; TraesCS7D02G211900
57	ko00730	Thiamine metabolism	13	3109	42	19303	0.00460622	0.016007	1.92176	TraesCS1B02G411100; TraesCS2B02G626400; TraesCS3A02G449200; TraesCS3A02G466700; TraesCS3B02G485900; TraesCS3D02G441900; TraesCS3D02G465600; TraesCS4A02G290400; TraesCS4B02G023800; TraesCS5A02G186000; TraesCS5B02G184100; TraesCS5D02G191100; TraesCS6B02G175200
58	ko00511	Other glycan degradation	18	3109	64	19303	0.00464204	0.016007	1.74621	TraesCS1A02G045400; TraesCS1A02G087500; TraesCS1A02G259800; TraesCS1A02G358800; TraesCS1B02G270100; TraesCS1D02G046100; TraesCS2D02G412600; TraesCS4A02G065600; TraesCS4B02G253500; TraesCS4D02G253400; TraesCS5B02G309300; TraesCS5D02G496800; TraesCS7A02G391400; TraesCS7B02G221100; TraesCS7B02G221400; TraesCS7B02G293100; TraesCS7D02G316700; TraesCS7D02G386900
59	ko00960	Tropane, piperidine and pyridine alkaloid biosynthesis	24	3109	92	19303	0.0047602	0.0161363	1.61967	TraesCS1A02G383700; TraesCS1B02G089000; TraesCS1D02G073000; TraesCS1D02G270500; TraesCS1D02G398900; TraesCS2B02G386600; TraesCS2D02G075000; TraesCS2D02G335300; TraesCS3A02G401900; TraesCS3A02G402000; TraesCS3A02G448300; TraesCS3B02G331100; TraesCS3B02G434900; TraesCS3D02G396800; TraesCS3D02G440700; TraesCS4A02G145400; TraesCS4B02G124800; TraesCS4D02G153400; TraesCS4D02G210700; TraesCS4D02G309300;…
60	ko00982	Drug metabolism - cytochrome P450	78	3109	375	19303	0.00633807	0.0211269	1.29142	TraesCS1A02G078800; TraesCS1A02G186100; TraesCS1A02G186400; TraesCS1A02G186800; TraesCS1A02G187000; TraesCS1B02G194600; TraesCS1B02G194900; TraesCS1D02G052200; TraesCS1D02G189600; TraesCS1D02G189700; TraesCS1D02G189800; TraesCS1D02G190000; TraesCS1D02G190200; TraesCS1D02G191100; TraesCS2A02G045400; TraesCS2A02G504300; TraesCS2A02G577900; TraesCS2B02G189700; TraesCS2D02G044100; TraesCS2D02G070400;…
61	ko00362	Benzoate degradation	5	3109	12	19303	0.00665272	0.0218122	2.58698	TraesCS2B02G049200; TraesCS3B02G008700; TraesCS3B02G357200; TraesCS3D02G005500; TraesCS3D02G321200
62	ko00562	Inositol phosphate metabolism	38	3109	164	19303	0.00678082	0.0218736	1.43861	TraesCS1A02G330900; TraesCS1B02G344900; TraesCS2A02G130800; TraesCS2A02G479000; TraesCS2A02G497700; TraesCS2A02G559200; TraesCS2D02G546200; TraesCS2D02G571300; TraesCS3A02G385500; TraesCS3A02G492100; TraesCS3B02G392000; TraesCS3B02G417700; TraesCS3B02G552800; TraesCS3B02G553200; TraesCS3D02G378500; TraesCS3D02G499600; TraesCS4A02G271600; TraesCS4A02G369600; TraesCS4B02G015300; TraesCS4B02G042400;…
63	ko01212	Fatty acid metabolism	63	3109	296	19303	0.0073191	0.0227709	1.32146	TraesCS1A02G075000; TraesCS1A02G110300; TraesCS1A02G143900; TraesCS1A02G342800; TraesCS1B02G129300; TraesCS1B02G355900; TraesCS1D02G111900; TraesCS1D02G219700; TraesCS1D02G344900; TraesCS2A02G109700; TraesCS2B02G049200; TraesCS2B02G127700; TraesCS2D02G176000; TraesCS2D02G312000; TraesCS3A02G086700; TraesCS3A02G237700; TraesCS3A02G531900; TraesCS3B02G008700; TraesCS3B02G048900; TraesCS3B02G102100;…
64	ko04152	AMPK signaling pathway	63	3109	296	19303	0.0073191	0.0227709	1.32146	TraesCS1A02G118300; TraesCS1A02G308900; TraesCS1A02G333800; TraesCS1A02G382900; TraesCS1B02G098600; TraesCS1B02G347100; TraesCS1D02G119400; TraesCS1D02G274000; TraesCS1D02G346200; TraesCS2A02G098000; TraesCS2A02G331600; TraesCS2B02G175800; TraesCS2B02G350600; TraesCS2D02G155700; TraesCS2D02G331300; TraesCS3A02G107600; TraesCS3A02G157000; TraesCS3A02G277700; TraesCS3A02G377600; TraesCS3B02G126400;…
65	ko02010	ABC transporters	24	3109	95	19303	0.00740054	0.0227709	1.56853	TraesCS1B02G387400; TraesCS1D02G374300; TraesCS2A02G344300; TraesCS2A02G521400; TraesCS2B02G550700; TraesCS2D02G322600; TraesCS2D02G523100; TraesCS3A02G257500; TraesCS3A02G258000; TraesCS3A02G258300; TraesCS3A02G258400; TraesCS3A02G285200; TraesCS3B02G290300; TraesCS3B02G291100; TraesCS3B02G319100; TraesCS3B02G607600; TraesCS3D02G257500; TraesCS3D02G257900; TraesCS3D02G258200; TraesCS3D02G285100;…
66	ko00906	Carotenoid biosynthesis	24	3109	98	19303	0.0111394	0.0332995	1.52051	TraesCS2A02G396200; TraesCS2B02G335400; TraesCS2B02G414500; TraesCS2D02G314900; TraesCS2D02G393900; TraesCS3D02G273500; TraesCS4A02G004900; TraesCS5A02G238000; TraesCS5A02G465100; TraesCS5B02G017900; TraesCS5B02G029300; TraesCS5B02G029400; TraesCS5B02G236500; TraesCS5B02G476900; TraesCS5D02G244900; TraesCS6A02G271300; TraesCS6A02G271600; TraesCS6A02G392000; TraesCS6B02G298500; TraesCS6B02G298700;…
67	ko00430	Taurine and hypotaurine metabolism	13	3109	46	19303	0.0111553	0.0332995	1.75465	TraesCS2B02G340500; TraesCS2B02G570400; TraesCS2D02G313500; TraesCS3B02G090400; TraesCS4A02G075600; TraesCS4A02G262600; TraesCS4B02G052300; TraesCS4B02G231400; TraesCS4D02G052500; TraesCS4D02G232700; TraesCS5B02G023000; TraesCS5B02G023100; TraesCS5D02G031600
68	ko00750	Vitamin B6 metabolism	10	3109	33	19303	0.011467	0.0337265	1.88144	TraesCS1A02G180800; TraesCS2A02G268800; TraesCS2B02G287600; TraesCS2D02G267800; TraesCS3A02G215400; TraesCS3A02G259700; TraesCS5A02G058100; TraesCS5B02G065400; TraesCS5D02G069700; TraesCS7A02G473000
69	ko00561	Glycerolipid metabolism	50	3109	233	19303	0.0121747	0.035289	1.33235	TraesCS1B02G144000; TraesCS1B02G233800; TraesCS1B02G253500; TraesCS1D02G162000; TraesCS1D02G241800; TraesCS2A02G105900; TraesCS2A02G388900; TraesCS2B02G122900; TraesCS3A02G303600; TraesCS3A02G339700; TraesCS3A02G355100; TraesCS3A02G368400; TraesCS3B02G332700; TraesCS3B02G351100; TraesCS3B02G371300; TraesCS3B02G388000; TraesCS3B02G400000; TraesCS3D02G298200; TraesCS3D02G315700; TraesCS3D02G333200;…
70	ko00660	C5-Branched dibasic acid metabolism	7	3109	21	19303	0.0126941	0.0362688	2.06958	TraesCS2D02G589000; TraesCS6A02G218300; TraesCS6A02G288000; TraesCS6B02G087100; TraesCS6B02G087200; TraesCS6B02G247900; TraesCS6D02G201500
71	ko02024	Quorum sensing	44	3109	203	19303	0.0142108	0.0396855	1.34574	TraesCS1A02G075000; TraesCS2B02G024500; TraesCS2D02G313500; TraesCS3A02G237700; TraesCS3A02G492100; TraesCS3B02G266100; TraesCS3B02G552800; TraesCS3B02G553200; TraesCS3B02G561300; TraesCS3D02G237900; TraesCS3D02G499600; TraesCS4A02G075600; TraesCS4A02G089800; TraesCS4A02G197600; TraesCS4A02G207000; TraesCS4A02G262600; TraesCS4A02G369600; TraesCS4B02G015300; TraesCS4B02G052300; TraesCS4B02G117800;…
72	ko04210	Apoptosis	23	3109	95	19303	0.0143132	0.0396855	1.50317	TraesCS1A02G038400; TraesCS1B02G049300; TraesCS1D02G040100; TraesCS2A02G185500; TraesCS2A02G273100; TraesCS2B02G221800; TraesCS2D02G160700; TraesCS2D02G202200; TraesCS2D02G272400; TraesCS4A02G252800; TraesCS4A02G252900; TraesCS4A02G257800; TraesCS4B02G056700; TraesCS4B02G062500; TraesCS4D02G057000; TraesCS4D02G061400; TraesCS5A02G326100; TraesCS5A02G391500; TraesCS5A02G407800; TraesCS5B02G326500;…
73	ko00363	Bisphenol degradation	2	3109	4	19303	0.0146836	0.0396855	3.10437	TraesCS2A02G292400; TraesCS2D02G290300
74	ko00624	Polycyclic aromatic hydrocarbon degradation	2	3109	4	19303	0.0146836	0.0396855	3.10437	TraesCS2A02G292400; TraesCS2D02G290300
75	ko01051	Biosynthesis of ansamycins	3	3109	7	19303	0.0155963	0.0415902	2.66089	TraesCS7A02G071100; TraesCS7D02G066500; TraesCSU02G063400
76	ko00220	Arginine biosynthesis	25	3109	106	19303	0.0162498	0.0425925	1.46433	TraesCS1B02G090600; TraesCS1D02G074600; TraesCS2A02G035700; TraesCS2A02G261600; TraesCS2A02G389900; TraesCS2A02G500400; TraesCS2B02G048700; TraesCS2B02G280600; TraesCS2B02G409300; TraesCS2B02G528300; TraesCS2D02G034900; TraesCS2D02G262400; TraesCS2D02G388800; TraesCS2D02G500600; TraesCS3B02G331100; TraesCS5A02G059300; TraesCS5D02G070800; TraesCS5D02G497800; TraesCS6A02G263900; TraesCS6B02G274800;…
77	ko04151	PI3K-Akt signaling pathway	50	3109	237	19303	0.0166738	0.0425925	1.30986	TraesCS1A02G077200; TraesCS1A02G118300; TraesCS1A02G129300; TraesCS1A02G333600; TraesCS1A02G333800; TraesCS1A02G382900; TraesCS1A02G407700; TraesCS1B02G095200; TraesCS1B02G098600; TraesCS1B02G337200; TraesCS1B02G347000; TraesCS1B02G347100; TraesCS1D02G079300; TraesCS1D02G119400; TraesCS1D02G125400; TraesCS1D02G336200; TraesCS2B02G175800; TraesCS2D02G155700; TraesCS3A02G154600; TraesCS3B02G180900;…
78	ko04810	Regulation of actin cytoskeleton	40	3109	184	19303	0.017095	0.0425925	1.34973	TraesCS1A02G333600; TraesCS1B02G128100; TraesCS1B02G337200; TraesCS1B02G347000; TraesCS1D02G336200; TraesCS2A02G130800; TraesCS2A02G479000; TraesCS2A02G559200; TraesCS2D02G546200; TraesCS2D02G571300; TraesCS3A02G154600; TraesCS3A02G385500; TraesCS3B02G180900; TraesCS3B02G417700; TraesCS3D02G378500; TraesCS4A02G071400; TraesCS4A02G271600; TraesCS4A02G315000; TraesCS4A02G408900; TraesCS4B02G042400;…
79	ko00604	Glycosphingolipid biosynthesis - ganglio series	6	3109	18	19303	0.0172149	0.0425925	2.06958	TraesCS1A02G045400; TraesCS1A02G259800; TraesCS1A02G358800; TraesCS1B02G270100; TraesCS1D02G046100; TraesCS4A02G065600
80	ko00401	Novobiocin biosynthesis	6	3109	18	19303	0.0172149	0.0425925	2.06958	TraesCS1B02G089000; TraesCS1D02G073000; TraesCS4A02G145400; TraesCS4B02G124800; TraesCS4D02G153400; TraesCS6D02G319300
81	ko04070	Phosphatidylinositol signaling system	43	3109	200	19303	0.01725	0.0425925	1.33488	TraesCS1A02G016900; TraesCS1A02G308700; TraesCS1A02G330900; TraesCS1A02G435200; TraesCS1B02G021300; TraesCS1B02G344900; TraesCS1D02G016500; TraesCS1D02G308000; TraesCS1D02G402400; TraesCS2A02G130800; TraesCS2A02G479000; TraesCS2A02G497700; TraesCS2A02G559200; TraesCS2D02G546200; TraesCS2D02G571300; TraesCS3A02G385500; TraesCS3B02G351100; TraesCS3B02G417700; TraesCS3D02G315700; TraesCS3D02G378500;…
82	ko00020	Citrate cycle (TCA cycle)	36	3109	165	19303	0.0205589	0.0501436	1.35464	TraesCS1B02G084700; TraesCS1B02G131300; TraesCS1B02G363100; TraesCS1D02G109600; TraesCS1D02G351500; TraesCS2A02G041100; TraesCS2B02G053600; TraesCS4A02G083900; TraesCS4A02G481800; TraesCS4B02G220200; TraesCS4B02G335100; TraesCS5A02G014300; TraesCS5A02G206600; TraesCS5A02G407700; TraesCS5A02G411200; TraesCS5A02G413300; TraesCS5A02G505000; TraesCS5B02G412500; TraesCS5B02G414900; TraesCS5B02G416700;…
83	ko01220	Degradation of aromatic compounds	10	3109	36	19303	0.0224795	0.0541675	1.72465	TraesCS1D02G052200; TraesCS2B02G189700; TraesCS3A02G136100; TraesCS3A02G342900; TraesCS3B02G375100; TraesCS3D02G136900; TraesCS3D02G336900; TraesCS4A02G406200; TraesCS6D02G371200; TraesCS7B02G299500
84	ko00640	Propanoate metabolism	20	3109	84	19303	0.0234837	0.0559135	1.47827	TraesCS1A02G210300; TraesCS1B02G084700; TraesCS1B02G131300; TraesCS1B02G206000; TraesCS1D02G109600; TraesCS2A02G074700; TraesCS2A02G076600; TraesCS2A02G109700; TraesCS2B02G049200; TraesCS2B02G127700; TraesCS2D02G073400; TraesCS3B02G008700; TraesCS3D02G005500; TraesCS4B02G071500; TraesCS5A02G120000; TraesCS5B02G121400; TraesCS5D02G126700; TraesCS6B02G050600; TraesCS6D02G041600; TraesCS7A02G487400
85	ko03410	Base excision repair	29	3109	130	19303	0.0238986	0.056232	1.38503	TraesCS1A02G038400; TraesCS1A02G172100; TraesCS1B02G049300; TraesCS1B02G156600; TraesCS1D02G040100; TraesCS1D02G139000; TraesCS1D02G172600; TraesCS2A02G364000; TraesCS2B02G030800; TraesCS2B02G382000; TraesCS2D02G361800; TraesCS3A02G075400; TraesCS3A02G328700; TraesCS3A02G330300; TraesCS3B02G137500; TraesCS3B02G359100; TraesCS3B02G385400; TraesCS3D02G120300; TraesCS3D02G322500; TraesCS4D02G007000;…
86	ko00945	Stilbenoid, diarylheptanoid and gingerol biosynthesis	27	3109	124	19303	0.0366876	0.0853201	1.3519	TraesCS1D02G021600; TraesCS2A02G292400; TraesCS2A02G354500; TraesCS2B02G374600; TraesCS2D02G290300; TraesCS2D02G354300; TraesCS3A02G136100; TraesCS3A02G331800; TraesCS3A02G342900; TraesCS3B02G350400; TraesCS3B02G375100; TraesCS3D02G136900; TraesCS3D02G314900; TraesCS3D02G336900; TraesCS4D02G359800; TraesCS5A02G257600; TraesCS5A02G549100; TraesCS5B02G461000; TraesCS6A02G260900; TraesCS6B02G288300;…
87	ko00983	Drug metabolism - other enzymes	13	3109	53	19303	0.0376204	0.0864838	1.5229	TraesCS1A02G183800; TraesCS1B02G205300; TraesCS1D02G192900; TraesCS3A02G249300; TraesCS3B02G278200; TraesCS3D02G249300; TraesCS5A02G284600; TraesCS5B02G283800; TraesCS5D02G292000; TraesCS6A02G047100; TraesCS6A02G299200; TraesCS6B02G328700; TraesCS6D02G278900
88	ko00340	Histidine metabolism	14	3109	60	19303	0.0501899	0.113839	1.44871	TraesCS2A02G388900; TraesCS4A02G084400; TraesCS4A02G219900; TraesCS4B02G098300; TraesCS4B02G330400; TraesCS4D02G094500; TraesCS5A02G501900; TraesCS5B02G210100; TraesCS5D02G218400; TraesCS6B02G284600; TraesCS6B02G284900; TraesCS7A02G210100; TraesCS7B02G116800; TraesCS7D02G211900
89	ko04110	Cell cycle	86	3109	457	19303	0.0506584	0.113839	1.16839	TraesCS1A02G077200; TraesCS1A02G129400; TraesCS1A02G264000; TraesCS1A02G264900; TraesCS1A02G299500; TraesCS1A02G309800; TraesCS1A02G407700; TraesCS1A02G420000; TraesCS1B02G095200; TraesCS1B02G146200; TraesCS1B02G274600; TraesCS1B02G275600; TraesCS1B02G298500; TraesCS1B02G309300; TraesCS1B02G320900; TraesCS1B02G321000; TraesCS1D02G079300; TraesCS1D02G125300; TraesCS1D02G219200; TraesCS1D02G226500;…
90	ko00440	Phosphonate and phosphinate metabolism	6	3109	22	19303	0.0515582	0.114574	1.6933	TraesCS1A02G196600; TraesCS1B02G211200; TraesCS1D02G200100; TraesCS3A02G367200; TraesCS3B02G398900; TraesCS3D02G360100
91	ko00904	Diterpenoid biosynthesis	24	3109	112	19303	0.0522576	0.114852	1.33045	TraesCS1B02G145600; TraesCS2A02G027800; TraesCS2A02G540400; TraesCS2B02G445100; TraesCS2B02G445200; TraesCS2B02G445300; TraesCS2B02G445500; TraesCS2B02G565800; TraesCS2B02G570800; TraesCS2B02G570900; TraesCS2D02G029600; TraesCS2D02G542100; TraesCS3A02G399800; TraesCS3B02G141800; TraesCS3B02G432800; TraesCS3D02G124500; TraesCS3D02G149600; TraesCS3D02G393900; TraesCS5D02G566200; TraesCS7A02G029600;…
92	ko00281	Geraniol degradation	2	3109	6	19303	0.0569798	0.123869	2.06958	TraesCS3D02G189400; TraesCS5A02G137700
93	ko00900	Terpenoid backbone biosynthesis	35	3109	173	19303	0.0597984	0.128599	1.25611	TraesCS1A02G259000; TraesCS1A02G365800; TraesCS1B02G269500; TraesCS1B02G383400; TraesCS1B02G411100; TraesCS1D02G258900; TraesCS1D02G371200; TraesCS2A02G501900; TraesCS2B02G049200; TraesCS2B02G445800; TraesCS2B02G530100; TraesCS2B02G626400; TraesCS2D02G199700; TraesCS2D02G423500; TraesCS2D02G502400; TraesCS3A02G254300; TraesCS3A02G331000; TraesCS3A02G370100; TraesCS3B02G008700; TraesCS3B02G260300;…
94	ko00232	Caffeine metabolism	3	3109	10	19303	0.0626014	0.129075	1.86262	TraesCS1A02G183800; TraesCS1B02G205300; TraesCS1D02G192900
95	ko00361	Chlorocyclohexane and chlorobenzene degradation	3	3109	10	19303	0.0626014	0.129075	1.86262	TraesCS1A02G250100; TraesCS1A02G268600; TraesCS1D02G268700
96	ko00364	Fluorobenzoate degradation	3	3109	10	19303	0.0626014	0.129075	1.86262	TraesCS1A02G250100; TraesCS1A02G268600; TraesCS1D02G268700
97	ko00623	Toluene degradation	3	3109	10	19303	0.0626014	0.129075	1.86262	TraesCS1A02G250100; TraesCS1A02G268600; TraesCS1D02G268700
98	ko00524	Neomycin, kanamycin and gentamicin biosynthesis	7	3109	28	19303	0.0690563	0.14031	1.55219	TraesCS1A02G122800; TraesCS1B02G142000; TraesCS1D02G123700; TraesCS3A02G286200; TraesCS3A02G480900; TraesCS3B02G525400; TraesCS3D02G475600
99	ko00791	Atrazine degradation	1	3109	3	19303	0.0694533	0.14031	2.06958	TraesCS5D02G497800
100	ko00040	Pentose and glucuronate interconversions	39	3109	198	19303	0.0726069	0.145214	1.22294	TraesCS1A02G263900; TraesCS1B02G198900; TraesCS1D02G264000; TraesCS1D02G344100; TraesCS2A02G117300; TraesCS2A02G173200; TraesCS2A02G388900; TraesCS2A02G405600; TraesCS2B02G024500; TraesCS2B02G199400; TraesCS2D02G117900; TraesCS2D02G180300; TraesCS2D02G402000; TraesCS2D02G402300; TraesCS3B02G148500; TraesCS3B02G258100; TraesCS3B02G434400; TraesCS3D02G130300; TraesCS3D02G396300; TraesCS4A02G219900;…
101	ko04122	Sulfur relay system	9	3109	38	19303	0.0737841	0.146107	1.47049	TraesCS5A02G059400; TraesCS5A02G186000; TraesCS5B02G066700; TraesCS5B02G184100; TraesCS5B02G191900; TraesCS5D02G191100; TraesCS5D02G199800; TraesCS6A02G245200; TraesCS6D02G128900
102	ko00670	One carbon pool by folate	11	3109	48	19303	0.0746748	0.146421	1.42284	TraesCS2A02G467900; TraesCS2B02G490900; TraesCS2D02G467900; TraesCS2D02G493600; TraesCS3A02G385600; TraesCS3B02G297000; TraesCS3B02G417800; TraesCS4A02G246100; TraesCS4B02G069300; TraesCS4D02G068100; TraesCS5B02G231100
103	ko04520	Adherens junction	15	3109	69	19303	0.0795421	0.154451	1.34973	TraesCS1A02G333600; TraesCS1B02G337200; TraesCS1B02G347000; TraesCS1D02G336200; TraesCS3A02G154600; TraesCS3A02G425700; TraesCS3A02G425900; TraesCS3A02G426400; TraesCS3B02G180900; TraesCS3B02G462600; TraesCS3D02G421200; TraesCS6B02G338000; TraesCS7A02G191400; TraesCS7A02G292000; TraesCS7D02G192400
104	ko00514	Other types of O-glycan biosynthesis	2	3109	7	19303	0.0880175	0.169264	1.77393	TraesCS2A02G196000; TraesCS2D02G204100
105	ko00531	Glycosaminoglycan degradation	9	3109	40	19303	0.0983397	0.183869	1.39697	TraesCS1A02G045400; TraesCS1A02G259800; TraesCS1A02G358800; TraesCS1B02G270100; TraesCS1D02G046100; TraesCS3D02G441600; TraesCS4A02G065600; TraesCS5A02G074000; TraesCS6A02G367300
106	ko00603	Glycosphingolipid biosynthesis - globo series	8	3109	35	19303	0.0983701	0.183869	1.41914	TraesCS1A02G045400; TraesCS1A02G259800; TraesCS1B02G270100; TraesCS1D02G046100; TraesCS1D02G162000; TraesCS2A02G105900; TraesCS2B02G122900; TraesCS4A02G065600
107	ko00521	Streptomycin biosynthesis	8	3109	35	19303	0.0983701	0.183869	1.41914	TraesCS1A02G122800; TraesCS1B02G142000; TraesCS1D02G123700; TraesCS3A02G286200; TraesCS3A02G480900; TraesCS3B02G525400; TraesCS3D02G475600; TraesCS4B02G267200
108	ko00072	Synthesis and degradation of ketone bodies	5	3109	21	19303	0.10858	0.201074	1.47827	TraesCS2B02G049200; TraesCS3B02G008700; TraesCS3D02G005500; TraesCS3D02G189400; TraesCS5A02G137700
109	ko00460	Cyanoamino acid metabolism	51	3109	274	19303	0.112746	0.206873	1.15564	TraesCS1A02G229300; TraesCS1D02G232700; TraesCS2A02G039400; TraesCS2A02G384300; TraesCS2B02G340500; TraesCS2B02G401500; TraesCS2D02G333800; TraesCS2D02G381100; TraesCS2D02G493600; TraesCS3A02G301100; TraesCS3A02G385600; TraesCS3A02G447500; TraesCS3B02G006000; TraesCS3B02G090400; TraesCS3B02G341500; TraesCS3B02G417800; TraesCS3B02G483500; TraesCS3D02G181400; TraesCS3D02G300700; TraesCS3D02G440200;…
110	ko00940	Phenylpropanoid biosynthesis	199	3109	1148	19303	0.11407	0.207399	1.07626	TraesCS1A02G177800; TraesCS1A02G229300; TraesCS1A02G319000; TraesCS1A02G342000; TraesCS1B02G048300; TraesCS1B02G048400; TraesCS1B02G048500; TraesCS1B02G122800; TraesCS1B02G202400; TraesCS1B02G331300; TraesCS1D02G019400; TraesCS1D02G021600; TraesCS1D02G039400; TraesCS1D02G039500; TraesCS1D02G080300; TraesCS1D02G103500; TraesCS1D02G176400; TraesCS1D02G232700; TraesCS1D02G318800; TraesCS1D02G366700;…
111	ko00600	Sphingolipid metabolism	23	3109	117	19303	0.121772	0.219409	1.22052	TraesCS1A02G358800; TraesCS1D02G162000; TraesCS2A02G105900; TraesCS2A02G204400; TraesCS2B02G122900; TraesCS3B02G100600; TraesCS3D02G085400; TraesCS3D02G227900; TraesCS4A02G221500; TraesCS4A02G381200; TraesCS4B02G099700; TraesCS4D02G095900; TraesCS5A02G194400; TraesCS5B02G189800; TraesCS6A02G306800; TraesCS6B02G335400; TraesCS6D02G286000; TraesCS7A02G187000; TraesCS7B02G092300; TraesCS7B02G221100;…
112	ko04015	Rap1 signaling pathway	16	3109	79	19303	0.12514	0.223464	1.25747	TraesCS1A02G308700; TraesCS1A02G333600; TraesCS1A02G435200; TraesCS1B02G337200; TraesCS1B02G347000; TraesCS1D02G308000; TraesCS1D02G336200; TraesCS1D02G402400; TraesCS3A02G154600; TraesCS3B02G180900; TraesCS5B02G227700; TraesCS5B02G237700; TraesCS5D02G392200; TraesCS6B02G338000; TraesCS7A02G191400; TraesCS7D02G192400
113	ko01040	Biosynthesis of unsaturated fatty acids	33	3109	175	19303	0.136914	0.242326	1.17079	TraesCS1A02G110300; TraesCS1A02G143900; TraesCS1A02G342800; TraesCS1B02G129300; TraesCS1B02G355900; TraesCS1D02G111900; TraesCS1D02G344900; TraesCS2D02G405600; TraesCS3A02G531900; TraesCS3B02G048900; TraesCS3B02G463000; TraesCS3D02G403800; TraesCS4A02G494700; TraesCS5B02G268900; TraesCS5D02G548700; TraesCS6A02G213100; TraesCS6A02G392400; TraesCS6B02G432600; TraesCS6D02G260900; TraesCS7A02G003900;…
114	ko00830	Retinol metabolism	13	3109	64	19303	0.139318	0.244418	1.26115	TraesCS1B02G144000; TraesCS1D02G052200; TraesCS2B02G189700; TraesCS4A02G406200; TraesCS5A02G164400; TraesCS5D02G169300; TraesCS6A02G097400; TraesCS6B02G118800; TraesCS6B02G125800; TraesCS6B02G407100; TraesCS6D02G085100; TraesCS6D02G371200; TraesCS7B02G241800
115	ko00941	Flavonoid biosynthesis	46	3109	250	19303	0.140679	0.244659	1.14241	TraesCS1A02G442300; TraesCS1B02G476400; TraesCS1D02G021600; TraesCS2A02G354500; TraesCS2A02G481200; TraesCS2B02G048400; TraesCS2B02G374600; TraesCS2B02G508400; TraesCS2B02G521500; TraesCS2B02G606800; TraesCS2D02G034500; TraesCS2D02G354300; TraesCS2D02G481700; TraesCS2D02G481800; TraesCS2D02G482000; TraesCS2D02G482100; TraesCS2D02G493400; TraesCS2D02G598900; TraesCS3A02G136100; TraesCS3A02G331800;…
116	ko00643	Styrene degradation	9	3109	43	19303	0.143051	0.24664	1.29951	TraesCS2D02G026300; TraesCS2D02G026900; TraesCS4A02G495000; TraesCS5A02G051800; TraesCS5B02G057800; TraesCS5D02G062900; TraesCS6A02G159100; TraesCS6B02G260800; TraesCS7D02G004100
117	ko04014	Ras signaling pathway	26	3109	137	19303	0.150641	0.257506	1.1783	TraesCS1A02G308700; TraesCS1A02G333600; TraesCS1A02G435200; TraesCS1B02G242500; TraesCS1B02G337200; TraesCS1B02G347000; TraesCS1D02G308000; TraesCS1D02G336200; TraesCS1D02G402400; TraesCS2A02G300100; TraesCS2D02G298000; TraesCS3A02G154600; TraesCS3B02G180900; TraesCS4A02G347800; TraesCS4B02G377600; TraesCS5A02G337100; TraesCS5B02G227700; TraesCS5B02G237700; TraesCS5B02G336100; TraesCS5B02G525600;…
118	ko00720	Carbon fixation pathways in prokaryotes	15	3109	77	19303	0.166905	0.28289	1.2095	TraesCS1A02G253200; TraesCS2B02G049200; TraesCS3A02G306700; TraesCS3B02G008700; TraesCS3B02G168000; TraesCS3B02G329800; TraesCS3D02G005500; TraesCS3D02G295200; TraesCS4B02G335100; TraesCS5A02G505000; TraesCS5B02G231100; TraesCS6A02G400000; TraesCS6B02G440200; TraesCS6D02G384200; TraesCS7D02G403000
119	ko00909	Sesquiterpenoid and triterpenoid biosynthesis	8	3109	40	19303	0.184535	0.310142	1.24175	TraesCS2B02G445800; TraesCS2D02G423500; TraesCS4A02G059900; TraesCS4B02G235500; TraesCS4D02G236900; TraesCS5D02G032600; TraesCS7A02G232900; TraesCS7D02G233100
120	ko04112	Cell cycle - Caulobacter	11	3109	57	19303	0.197648	0.329414	1.19818	TraesCS1A02G198400; TraesCS1B02G213300; TraesCS2A02G294500; TraesCS2A02G488400; TraesCS2B02G310900; TraesCS2D02G292200; TraesCS2D02G372600; TraesCS2D02G488700; TraesCS4B02G181600; TraesCS5A02G321500; TraesCS5D02G328300
121	ko00626	Naphthalene degradation	4	3109	20	19303	0.209785	0.346752	1.24175	TraesCS1D02G052200; TraesCS2B02G189700; TraesCS4A02G406200; TraesCS6D02G371200
122	ko00450	Selenocompound metabolism	13	3109	69	19303	0.212515	0.348385	1.16976	TraesCS1A02G181000; TraesCS1B02G199600; TraesCS4A02G051900; TraesCS4A02G078800; TraesCS4A02G159700; TraesCS4B02G245500; TraesCS4B02G252400; TraesCS4D02G012900; TraesCS4D02G159500; TraesCS4D02G243900; TraesCS4D02G252700; TraesCS7A02G046700; TraesCS7A02G401200
123	ko03430	Mismatch repair	26	3109	144	19303	0.222554	0.359323	1.12102	TraesCS1A02G172100; TraesCS1D02G131600; TraesCS1D02G172600; TraesCS2A02G364000; TraesCS2A02G587900; TraesCS2B02G382000; TraesCS2D02G361800; TraesCS2D02G565300; TraesCS3A02G117500; TraesCS3A02G172400; TraesCS3B02G136600; TraesCS3B02G564100; TraesCS3D02G119400; TraesCS3D02G184600; TraesCS3D02G292300; TraesCS4A02G058000; TraesCS4B02G246900; TraesCS4D02G246300; TraesCS5D02G437600; TraesCS6A02G373400;…
124	ko00740	Riboflavin metabolism	6	3109	31	19303	0.222781	0.359323	1.20169	TraesCS1A02G285400; TraesCS1B02G294600; TraesCS1D02G284400; TraesCS6A02G207300; TraesCS6B02G230600; TraesCS6D02G189100
125	ko04142	Lysosome	45	3109	256	19303	0.229859	0.367774	1.09138	TraesCS1A02G019000; TraesCS1A02G045400; TraesCS1A02G259800; TraesCS1A02G358800; TraesCS1B02G270100; TraesCS1D02G046100; TraesCS1D02G081100; TraesCS1D02G219700; TraesCS2A02G273100; TraesCS2A02G386700; TraesCS2B02G094800; TraesCS2D02G077300; TraesCS2D02G160700; TraesCS2D02G272400; TraesCS2D02G383400; TraesCS2D02G412600; TraesCS3A02G210400; TraesCS3D02G213200; TraesCS3D02G441600; TraesCS4A02G065600;…
126	ko00380	Tryptophan metabolism	36	3109	204	19303	0.23933	0.379889	1.09566	TraesCS1A02G113600; TraesCS1D02G114800; TraesCS2A02G388900; TraesCS2B02G049200; TraesCS2D02G026300; TraesCS2D02G026900; TraesCS3B02G008700; TraesCS3D02G005500; TraesCS3D02G030500; TraesCS4A02G219900; TraesCS4A02G325400; TraesCS4A02G373500; TraesCS4B02G098300; TraesCS4D02G094500; TraesCS5B02G210100; TraesCS5B02G216000; TraesCS5B02G538300; TraesCS5D02G218400; TraesCS5D02G225200; TraesCS5D02G556600;…
127	ko00073	Cutin, suberine and wax biosynthesis	22	3109	123	19303	0.249159	0.390442	1.11051	TraesCS2A02G367700; TraesCS2A02G385600; TraesCS2A02G407500; TraesCS2B02G402500; TraesCS2B02G425400; TraesCS2D02G364500; TraesCS2D02G364600; TraesCS2D02G382300; TraesCS2D02G404600; TraesCS3A02G014800; TraesCS3B02G206100; TraesCS3D02G182100; TraesCS4A02G304400; TraesCS4B02G283200; TraesCS4D02G008300; TraesCS4D02G356300; TraesCS6D02G149300; TraesCS7B02G110100; TraesCS7B02G110300; TraesCS7D02G206100;…
128	ko00471	D-Glutamine and D-glutamate metabolism	3	3109	16	19303	0.249883	0.390442	1.16414	TraesCS2A02G389900; TraesCS2B02G409300; TraesCS2D02G388800
129	ko00261	Monobactam biosynthesis	6	3109	33	19303	0.274959	0.426293	1.12886	TraesCS3A02G442100; TraesCS3B02G475900; TraesCS3D02G434800; TraesCS4A02G337800; TraesCS5B02G174600; TraesCS5D02G181600
130	ko04370	VEGF signaling pathway	13	3109	73	19303	0.280855	0.432084	1.10567	TraesCS1A02G333600; TraesCS1B02G337200; TraesCS1B02G347000; TraesCS1B02G370800; TraesCS1B02G370900; TraesCS1D02G336200; TraesCS2A02G204400; TraesCS3A02G154600; TraesCS3A02G208300; TraesCS3B02G180900; TraesCS6B02G338000; TraesCS7A02G191400; TraesCS7D02G192400
131	ko04111	Cell cycle - yeast	61	3109	358	19303	0.28501	0.43513	1.05792	TraesCS1A02G129400; TraesCS1A02G264000; TraesCS1A02G299500; TraesCS1A02G314100; TraesCS1A02G420000; TraesCS1B02G146200; TraesCS1B02G274600; TraesCS1B02G309300; TraesCS1B02G326400; TraesCS1D02G125300; TraesCS1D02G219200; TraesCS1D02G226500; TraesCS1D02G264100; TraesCS1D02G298400; TraesCS1D02G314600; TraesCS1D02G427800; TraesCS2A02G129900; TraesCS2B02G152100; TraesCS2D02G132100; TraesCS2D02G341700;…
132	ko04113	Meiosis - yeast	39	3109	235	19303	0.377331	0.570465	1.03039	TraesCS1A02G118300; TraesCS1A02G129400; TraesCS1A02G264000; TraesCS1A02G299500; TraesCS1A02G382900; TraesCS1B02G128100; TraesCS1B02G146200; TraesCS1B02G274600; TraesCS1B02G309300; TraesCS1D02G119400; TraesCS1D02G125300; TraesCS1D02G219200; TraesCS1D02G226500; TraesCS1D02G264100; TraesCS1D02G298400; TraesCS2D02G341700; TraesCS2D02G343300; TraesCS3A02G200400; TraesCS3B02G224600; TraesCS3D02G203400;…
133	ko04392	Hippo signaling pathway -multiple species	5	3109	31	19303	0.382212	0.570465	1.00141	TraesCS3A02G251600; TraesCS5A02G426700; TraesCS5D02G434700; TraesCS6A02G378000; TraesCS6B02G062900
134	ko04630	Jak-STAT signaling pathway	5	3109	31	19303	0.382212	0.570465	1.00141	TraesCS3A02G425700; TraesCS3A02G425900; TraesCS3A02G426400; TraesCS3B02G462600; TraesCS3D02G421200
135	ko04214	Apoptosis - fly	9	3109	55	19303	0.391835	0.580496	1.01598	TraesCS1A02G038400; TraesCS1A02G159300; TraesCS1B02G049300; TraesCS1B02G298500; TraesCS1D02G040100; TraesCS2B02G313700; TraesCS2D02G295500; TraesCS6B02G141000; TraesCS7A02G414700
136	ko00965	Betalain biosynthesis	2	3109	14	19303	0.397591	0.584692	0.886964	TraesCS3B02G421200; TraesCS3D02G381800
137	ko00760	Nicotinate and nicotinamide metabolism	8	3109	51	19303	0.439724	0.641933	0.973921	TraesCS1B02G073700; TraesCS1D02G057300; TraesCS2A02G302400; TraesCS2B02G318300; TraesCS2D02G301100; TraesCS3A02G495300; TraesCS3D02G502500; TraesCS7D02G278400
138	ko00061	Fatty acid biosynthesis	24	3109	150	19303	0.459916	0.666544	0.9934	TraesCS1A02G075000; TraesCS1A02G342800; TraesCS1B02G355900; TraesCS1D02G344900; TraesCS2D02G176000; TraesCS2D02G312000; TraesCS3A02G237700; TraesCS3B02G048900; TraesCS3B02G266100; TraesCS3B02G463000; TraesCS3D02G237900; TraesCS3D02G403800; TraesCS4A02G207000; TraesCS4B02G133700; TraesCS5A02G133200; TraesCS5A02G148700; TraesCS5B02G131800; TraesCS5B02G170100; TraesCS5B02G415100; TraesCS5D02G141300;…
139	ko04390	Hippo signaling pathway	15	3109	95	19303	0.465313	0.669515	0.980329	TraesCS1A02G077200; TraesCS1A02G407700; TraesCS1B02G095200; TraesCS1B02G128100; TraesCS1D02G079300; TraesCS4A02G315000; TraesCS4A02G345500; TraesCS5A02G426700; TraesCS5B02G529300; TraesCS5B02G565000; TraesCS5D02G434700; TraesCS5D02G528400; TraesCS6A02G378000; TraesCS6B02G062900; TraesCS7A02G364400
140	ko00905	Brassinosteroid biosynthesis	9	3109	59	19303	0.484272	0.691818	0.947097	TraesCS2A02G013500; TraesCS2B02G350400; TraesCS2D02G014700; TraesCS3A02G366000; TraesCS3B02G397800; TraesCS4A02G078000; TraesCS4B02G234100; TraesCS4D02G235200; TraesCS6D02G166900
141	ko02020	Two-component system	9	3109	60	19303	0.506986	0.712038	0.931312	TraesCS1B02G413000; TraesCS2A02G193800; TraesCS2A02G500400; TraesCS2B02G049200; TraesCS2B02G213000; TraesCS2B02G528300; TraesCS2D02G500600; TraesCS3B02G008700; TraesCS3D02G005500
142	ko04011	MAPK signaling pathway - yeast	18	3109	116	19303	0.507158	0.712038	0.963427	TraesCS1D02G312600; TraesCS2A02G130800; TraesCS2A02G479000; TraesCS2D02G546200; TraesCS3A02G251600; TraesCS3A02G330600; TraesCS3B02G360600; TraesCS3B02G521400; TraesCS3D02G473600; TraesCS4A02G271600; TraesCS4B02G042400; TraesCS4B02G216900; TraesCS4D02G039700; TraesCS7A02G244000; TraesCS7A02G549800; TraesCS7B02G473400; TraesCS7D02G542800; TraesCSU02G105300
143	ko00908	Zeatin biosynthesis	13	3109	85	19303	0.509107	0.712038	0.949573	TraesCS1B02G176000; TraesCS1B02G323900; TraesCS1D02G383600; TraesCS2B02G428300; TraesCS2B02G428900; TraesCS2D02G407300; TraesCS2D02G407500; TraesCS2D02G407600; TraesCS3A02G109500; TraesCS3B02G128700; TraesCS3D02G111300; TraesCS3D02G475800; TraesCS7B02G264400
144	ko00942	Anthocyanin biosynthesis	1	3109	11	19303	0.549201	0.762779	0.564432	TraesCS7B02G059500
145	ko00627	Aminobenzoate degradation	5	3109	38	19303	0.589273	0.81279	0.816941	TraesCS2A02G292400; TraesCS2D02G026300; TraesCS2D02G026900; TraesCS2D02G290300; TraesCS6B02G260800
146	ko04071	Sphingolipid signaling pathway	27	3109	180	19303	0.611392	0.837523	0.931312	TraesCS1A02G118300; TraesCS1A02G333600; TraesCS1A02G382900; TraesCS1B02G242500; TraesCS1B02G337200; TraesCS1B02G347000; TraesCS1D02G119400; TraesCS1D02G336200; TraesCS2A02G204400; TraesCS3A02G154600; TraesCS3B02G100600; TraesCS3B02G180900; TraesCS3D02G085400; TraesCS3D02G227900; TraesCS4A02G347800; TraesCS4B02G377600; TraesCS4D02G023700; TraesCS5A02G194400; TraesCS5A02G337100; TraesCS5B02G189800;…
147	ko04072	Phospholipase D signaling pathway	21	3109	144	19303	0.641763	0.873147	0.905443	TraesCS1B02G242500; TraesCS2A02G130800; TraesCS2A02G479000; TraesCS2D02G546200; TraesCS3B02G351100; TraesCS3D02G315700; TraesCS4A02G271600; TraesCS4A02G347800; TraesCS4B02G042400; TraesCS4B02G216900; TraesCS4B02G377600; TraesCS4D02G039700; TraesCS5A02G337100; TraesCS5B02G336100; TraesCS5B02G525600; TraesCS5D02G341800; TraesCS6A02G347800; TraesCS6D02G330800; TraesCS7B02G198600; TraesCS7D02G387000;…
148	ko04330	Notch signaling pathway	8	3109	60	19303	0.646151	0.873176	0.827833	TraesCS3A02G425700; TraesCS3A02G425900; TraesCS3A02G426400; TraesCS3B02G462600; TraesCS3D02G421200; TraesCS6B02G210200; TraesCS7A02G176000; TraesCS7D02G356800
149	ko03070	Bacterial secretion system	8	3109	62	19303	0.685866	0.920625	0.801129	TraesCS3B02G561300; TraesCS4A02G197600; TraesCS4B02G117800; TraesCS4B02G117900; TraesCS4D02G115500; TraesCS4D02G115600; TraesCS5D02G531600; TraesCSU02G058200
150	ko00790	Folate biosynthesis	6	3109	49	19303	0.694573	0.926098	0.760255	TraesCS1D02G340500; TraesCS5A02G059400; TraesCS5B02G066700; TraesCS5B02G191900; TraesCS5D02G199800; TraesCS6A02G245200
151	ko00195	Photosynthesis	79	3109	523	19303	0.71307	0.944463	0.937842	TraesCS1A02G276300; TraesCS1A02G326100; TraesCS1A02G392000; TraesCS1B02G420100; TraesCS1D02G275800; TraesCS1D02G400100; TraesCS2A02G114400; TraesCS2A02G207900; TraesCS2A02G223600; TraesCS2A02G247300; TraesCS2A02G252600; TraesCS2A02G254600; TraesCS2A02G296400; TraesCS2A02G344400; TraesCS2B02G133500; TraesCS2B02G234500; TraesCS2B02G267500; TraesCS2B02G270300; TraesCS2B02G272300; TraesCS2B02G273900;…
152	ko00140	Steroid hormone biosynthesis	11	3109	85	19303	0.734923	0.967004	0.803485	TraesCS5B02G268900; TraesCS6A02G097400; TraesCS6A02G213100; TraesCS6B02G118800; TraesCS6B02G125800; TraesCS6D02G085100; TraesCS7A02G220900; TraesCS7B02G126300; TraesCS7B02G241800; TraesCS7D02G076100; TraesCSU02G101500
153	ko00540	Lipopolysaccharide biosynthesis	2	3109	24	19303	0.76703	1	0.517396	TraesCS1D02G401900; TraesCS2D02G098000
154	ko00402	Benzoxazinoid biosynthesis	3	3109	32	19303	0.780816	1	0.58207	TraesCS2D02G464200; TraesCS5A02G441300; TraesCSU02G005100
155	ko00902	Monoterpenoid biosynthesis	6	3109	54	19303	0.788256	1	0.689861	TraesCS1B02G437500; TraesCS1D02G415900; TraesCS2A02G516200; TraesCS6A02G067800; TraesCS6B02G091700; TraesCS6B02G413300
156	ko04066	HIF-1 signaling pathway	21	3109	157	19303	0.793297	1	0.83047	TraesCS1A02G122800; TraesCS1B02G142000; TraesCS1D02G123700; TraesCS3A02G286200; TraesCS3A02G425700; TraesCS3A02G425900; TraesCS3A02G426400; TraesCS3A02G480900; TraesCS3B02G462600; TraesCS3B02G525400; TraesCS3D02G042600; TraesCS3D02G421200; TraesCS3D02G475600; TraesCS4A02G373800; TraesCS4B02G170700; TraesCS4D02G172700; TraesCS6A02G311800; TraesCS7A02G075600; TraesCS7B02G161100; TraesCS7D02G071200;…
157	ko04130	SNARE interactions in vesicular transport	16	3109	124	19303	0.800541	1	0.801129	TraesCS2A02G213400; TraesCS2A02G219200; TraesCS2B02G238200; TraesCS2D02G219400; TraesCS3B02G184700; TraesCS3B02G431300; TraesCS3D02G165300; TraesCS4A02G247700; TraesCS4B02G067200; TraesCS4D02G066100; TraesCS5A02G425600; TraesCS5B02G427600; TraesCS6D02G355800; TraesCS7D02G136300; TraesCS7D02G324800; TraesCSU02G076400
158	ko00785	Lipoic acid metabolism	1	3109	18	19303	0.811314	1	0.34493	TraesCS3B02G339000
159	ko04139	Regulation of mitophagy - yeast	22	3109	166	19303	0.814386	1	0.822846	TraesCS2A02G130800; TraesCS2A02G224000; TraesCS2A02G468300; TraesCS2A02G479000; TraesCS2B02G274200; TraesCS2B02G491200; TraesCS2D02G229900; TraesCS2D02G546200; TraesCS3D02G007000; TraesCS3D02G210100; TraesCS4A02G271600; TraesCS4B02G042400; TraesCS4B02G216900; TraesCS4D02G039700; TraesCS5A02G158000; TraesCS5A02G515900; TraesCS5B02G155700; TraesCS5B02G523700; TraesCS5B02G524400; TraesCS5D02G163400;…
160	ko00920	Sulfur metabolism	14	3109	112	19303	0.818091	1	0.776094	TraesCS2D02G203500; TraesCS3A02G287400; TraesCS3B02G272000; TraesCS3B02G321600; TraesCS3D02G286900; TraesCS4A02G159700; TraesCS4D02G159500; TraesCS5A02G022200; TraesCS5A02G300400; TraesCS5B02G018700; TraesCS5B02G300800; TraesCS5D02G027600; TraesCS6D02G128900; TraesCS7A02G359800
161	ko00240	Pyrimidine metabolism	62	3109	431	19303	0.819831	1	0.893138	TraesCS1A02G227700; TraesCS1A02G281700; TraesCS1B02G073700; TraesCS1B02G126800; TraesCS1B02G156600; TraesCS1B02G242000; TraesCS1B02G290800; TraesCS1B02G441900; TraesCS1D02G057300; TraesCS1D02G139000; TraesCS1D02G229400; TraesCS1D02G280900; TraesCS2A02G239200; TraesCS2A02G558100; TraesCS2B02G364700; TraesCS2B02G622300; TraesCS2D02G344900; TraesCS2D02G571500; TraesCS3A02G249300; TraesCS3A02G333200;…
162	ko00944	Flavone and flavonol biosynthesis	4	3109	43	19303	0.844023	1	0.577558	TraesCS1A02G442300; TraesCS1B02G476400; TraesCS3A02G534900; TraesCS5D02G488900
163	ko03020	RNA polymerase	22	3109	172	19303	0.862004	1	0.794142	TraesCS1B02G126800; TraesCS2A02G558100; TraesCS2B02G364700; TraesCS2B02G622300; TraesCS2D02G344900; TraesCS2D02G571500; TraesCS3A02G333200; TraesCS3B02G363400; TraesCS3D02G268300; TraesCS3D02G326800; TraesCS5A02G114800; TraesCS5B02G498800; TraesCS5B02G499000; TraesCS5D02G499000; TraesCS6A02G286200; TraesCS6A02G286300; TraesCS6B02G013400; TraesCS6B02G315200; TraesCS6B02G315300; TraesCS6D02G062500;…
164	ko03420	Nucleotide excision repair	26	3109	201	19303	0.872933	1	0.803122	TraesCS1A02G172100; TraesCS1B02G156600; TraesCS1D02G139000; TraesCS1D02G172600; TraesCS1D02G185100; TraesCS2A02G364000; TraesCS2B02G382000; TraesCS2D02G361800; TraesCS3A02G172400; TraesCS3A02G210100; TraesCS3B02G137500; TraesCS3B02G240600; TraesCS3D02G120300; TraesCS3D02G184600; TraesCS3D02G292300; TraesCS4A02G058000; TraesCS4B02G246900; TraesCS4D02G007000; TraesCS4D02G246300; TraesCS5D02G437600;…
165	ko04391	Hippo signaling pathway - fly	10	3109	90	19303	0.877389	1	0.689861	TraesCS3A02G438700; TraesCS3B02G472600; TraesCS3D02G431100; TraesCS5A02G426700; TraesCS5D02G297200; TraesCS5D02G434700; TraesCS6A02G378000; TraesCS6B02G062900; TraesCS7A02G364400; TraesCS7D02G323000
166	ko04010	MAPK signaling pathway	16	3109	133	19303	0.880343	1	0.746917	TraesCS1A02G333600; TraesCS1B02G337200; TraesCS1B02G347000; TraesCS1B02G370800; TraesCS1B02G370900; TraesCS1D02G336200; TraesCS3A02G154600; TraesCS3A02G208300; TraesCS3B02G180900; TraesCS4A02G097900; TraesCS4B02G206700; TraesCS4D02G207500; TraesCS6B02G338000; TraesCS7A02G191400; TraesCS7D02G192400; TraesCS7D02G224700
167	ko04020	Calcium signaling pathway	16	3109	139	19303	0.917766	1	0.714676	TraesCS1A02G308700; TraesCS1A02G360400; TraesCS1A02G435200; TraesCS1B02G370800; TraesCS1B02G370900; TraesCS1B02G376900; TraesCS1D02G308000; TraesCS1D02G364800; TraesCS1D02G402400; TraesCS2A02G204400; TraesCS3A02G208300; TraesCS3B02G050500; TraesCS4D02G060900; TraesCS5B02G227700; TraesCS5B02G237700; TraesCS5D02G392200
168	ko00780	Biotin metabolism	7	3109	73	19303	0.918868	1	0.595359	TraesCS1A02G342800; TraesCS1B02G355900; TraesCS1D02G344900; TraesCS2D02G176000; TraesCS2D02G312000; TraesCS3B02G048900; TraesCS5B02G170100
169	ko04064	NF-kappa B signaling pathway	12	3109	111	19303	0.923098	1	0.671216	TraesCS2A02G098700; TraesCS2A02G509600; TraesCS2B02G114900; TraesCS2B02G537500; TraesCS2D02G040700; TraesCS2D02G067800; TraesCS3D02G299500; TraesCS4B02G328400; TraesCS4D02G325400; TraesCS4D02G325500; TraesCS5A02G500100; TraesCS7A02G223700
170	ko04022	cGMP-PKG signaling pathway	18	3109	155	19303	0.926159	1	0.721016	TraesCS1A02G308700; TraesCS1A02G360400; TraesCS1A02G435200; TraesCS1B02G128100; TraesCS1B02G370800; TraesCS1B02G370900; TraesCS1B02G376900; TraesCS1D02G308000; TraesCS1D02G364800; TraesCS1D02G402400; TraesCS3A02G208300; TraesCS3B02G050500; TraesCS4A02G315000; TraesCS4D02G060900; TraesCS5B02G227700; TraesCS5B02G237700; TraesCS5B02G565000; TraesCS5D02G392200
171	ko03460	Fanconi anemia pathway	19	3109	163	19303	0.930007	1	0.723719	TraesCS1B02G298500; TraesCS1D02G185100; TraesCS2B02G302300; TraesCS3A02G172400; TraesCS3B02G534900; TraesCS3B02G535000; TraesCS3B02G564100; TraesCS3D02G184600; TraesCS3D02G292300; TraesCS4A02G058000; TraesCS4B02G246900; TraesCS4D02G246300; TraesCS5B02G354900; TraesCS5D02G285200; TraesCS6A02G413400; TraesCS6B02G235900; TraesCS6D02G190900; TraesCS6D02G398100; TraesCS7A02G476500
172	ko00062	Fatty acid elongation	27	3109	226	19303	0.951345	1	0.741753	TraesCS1A02G406200; TraesCS1B02G048000; TraesCS1B02G387800; TraesCS1D02G219700; TraesCS1D02G374700; TraesCS1D02G420900; TraesCS2D02G405600; TraesCS3A02G531900; TraesCS4A02G007400; TraesCS4A02G065300; TraesCS4B02G274700; TraesCS4B02G371300; TraesCS4D02G008200; TraesCS4D02G273400; TraesCS4D02G366100; TraesCS5A02G156900; TraesCS5B02G268900; TraesCS6A02G213100; TraesCS6A02G383700; TraesCS6D02G274600;…
173	ko04115	p53 signaling pathway	21	3109	185	19303	0.956777	1	0.704777	TraesCS1A02G309800; TraesCS1B02G298500; TraesCS1B02G320900; TraesCS1B02G321000; TraesCS1D02G309300; TraesCS2A02G404800; TraesCS2B02G422800; TraesCS2D02G401700; TraesCS3A02G027500; TraesCS3A02G028800; TraesCS3A02G048300; TraesCS3A02G192100; TraesCS3A02G333000; TraesCS3B02G363200; TraesCS3D02G018300; TraesCS3D02G031300; TraesCS3D02G326600; TraesCS3D02G512700; TraesCS4B02G353600; TraesCS4D02G347600;…
174	ko03450	Non-homologous end-joining	1	3109	32	19303	0.974188	1	0.194023	TraesCS5A02G081400
175	ko03440	Homologous recombination	20	3109	186	19303	0.975297	1	0.667607	TraesCS1A02G245700; TraesCS1D02G245400; TraesCS2A02G140400; TraesCS2A02G182200; TraesCS2B02G164300; TraesCS2B02G208700; TraesCS3A02G172400; TraesCS3B02G534900; TraesCS3B02G535000; TraesCS3D02G184600; TraesCS3D02G292300; TraesCS4A02G058000; TraesCS4B02G246900; TraesCS4D02G246300; TraesCS5A02G081400; TraesCS5D02G285200; TraesCS6A02G413400; TraesCS6B02G351900; TraesCS6D02G398100; TraesCS7A02G476500
176	ko00230	Purine metabolism	70	3109	540	19303	0.97703	1	0.804838	TraesCS1A02G183800; TraesCS1A02G225000; TraesCS1A02G227700; TraesCS1B02G126800; TraesCS1B02G156600; TraesCS1B02G205300; TraesCS1B02G238200; TraesCS1B02G242000; TraesCS1D02G139000; TraesCS1D02G192900; TraesCS1D02G229400; TraesCS2A02G239200; TraesCS2A02G548300; TraesCS2A02G558100; TraesCS2B02G101700; TraesCS2B02G364700; TraesCS2B02G622300; TraesCS2D02G084300; TraesCS2D02G203500; TraesCS2D02G344900;…
177	ko00510	N-Glycan biosynthesis	13	3109	136	19303	0.98038	1	0.593483	TraesCS1A02G340400; TraesCS1D02G342400; TraesCS3A02G428800; TraesCS3B02G308200; TraesCS4B02G322500; TraesCS5A02G494600; TraesCS5B02G051200; TraesCS5D02G056900; TraesCS6A02G077400; TraesCS6A02G361100; TraesCS6D02G243100; TraesCSU02G026400; TraesCSU02G026800
178	ko04013	MAPK signaling pathway - fly	22	3109	206	19303	0.982772	1	0.66307	TraesCS1A02G333600; TraesCS1B02G337200; TraesCS1B02G347000; TraesCS1D02G104600; TraesCS1D02G336200; TraesCS3A02G027500; TraesCS3A02G028800; TraesCS3A02G048300; TraesCS3A02G154600; TraesCS3B02G180900; TraesCS3B02G266900; TraesCS3D02G018300; TraesCS3D02G031300; TraesCS3D02G238700; TraesCS3D02G512700; TraesCS4A02G390300; TraesCS4A02G434000; TraesCS6B02G338000; TraesCS7A02G090400; TraesCS7A02G191400;…
179	ko03018	RNA degradation	43	3109	359	19303	0.983643	1	0.743666	TraesCS1B02G155600; TraesCS1B02G254600; TraesCS1B02G314900; TraesCS1D02G138000; TraesCS1D02G346200; TraesCS2A02G073800; TraesCS2A02G239200; TraesCS2B02G005200; TraesCS2B02G120600; TraesCS2B02G599000; TraesCS2D02G310000; TraesCS2D02G593700; TraesCS3A02G107600; TraesCS3A02G133600; TraesCS3A02G277700; TraesCS3B02G126400; TraesCS3B02G165900; TraesCS3B02G311900; TraesCS3D02G109600; TraesCS3D02G149900;…
180	ko00513	Various types of N-glycan biosynthesis	8	3109	104	19303	0.990937	1	0.477596	TraesCS1A02G340400; TraesCS1D02G342400; TraesCS3B02G308200; TraesCS4B02G322500; TraesCS5A02G494600; TraesCS6A02G361100; TraesCS7B02G093500; TraesCS7D02G189700
181	ko00970	Aminoacyl-tRNA biosynthesis	25	3109	243	19303	0.993907	1	0.63876	TraesCS1A02G145100; TraesCS1A02G235200; TraesCS1B02G248400; TraesCS1D02G236900; TraesCS2A02G246200; TraesCS2D02G154000; TraesCS3A02G163300; TraesCS3B02G194400; TraesCS3B02G297000; TraesCS3D02G113800; TraesCS3D02G169600; TraesCS3D02G458600; TraesCS4A02G051900; TraesCS4A02G078800; TraesCS4B02G245500; TraesCS4B02G252400; TraesCS4D02G243900; TraesCS4D02G252700; TraesCS5B02G102600; TraesCS5D02G048600;…
182	ko04310	Wnt signaling pathway	46	3109	401	19303	0.994951	1	0.712226	TraesCS1A02G033800; TraesCS1A02G077200; TraesCS1A02G333600; TraesCS1A02G407700; TraesCS1B02G095200; TraesCS1B02G337200; TraesCS1B02G347000; TraesCS1B02G370800; TraesCS1B02G370900; TraesCS1D02G079300; TraesCS1D02G336200; TraesCS2A02G436200; TraesCS3A02G027500; TraesCS3A02G028800; TraesCS3A02G048300; TraesCS3A02G154600; TraesCS3A02G208300; TraesCS3A02G425700; TraesCS3A02G425900; TraesCS3A02G426400;…
183	ko04350	TGF-beta signaling pathway	14	3109	165	19303	0.996935	1	0.526803	TraesCS3A02G425700; TraesCS3A02G425900; TraesCS3A02G426400; TraesCS3B02G462600; TraesCS3B02G566400; TraesCS3D02G421200; TraesCS3D02G509600; TraesCS4A02G379700; TraesCS4B02G170700; TraesCS4D02G172700; TraesCS5A02G093500; TraesCS5B02G099600; TraesCS6B02G024700; TraesCS7A02G364400
184	ko03060	Protein export	24	3109	245	19303	0.997076	1	0.608204	TraesCS2A02G001300; TraesCS2A02G585600; TraesCS2D02G600900; TraesCS3B02G042600; TraesCS3B02G561300; TraesCS4A02G056500; TraesCS4A02G197600; TraesCS4B02G117800; TraesCS4B02G117900; TraesCS4B02G248500; TraesCS4D02G115500; TraesCS4D02G115600; TraesCS4D02G247900; TraesCS5A02G235700; TraesCS5A02G298700; TraesCS5A02G511700; TraesCS5B02G406800; TraesCS5D02G070100; TraesCS5D02G531600; TraesCS7A02G533400;…
185	ko00563	Glycosylphosphatidylinositol(GPI)-anchor biosynthesis	4	3109	84	19303	0.998675	1	0.295655	TraesCS1D02G061100; TraesCS5B02G099800; TraesCS5B02G123400; TraesCS5D02G131700
186	ko03015	mRNA surveillance pathway	38	3109	373	19303	0.999375	1	0.632527	TraesCS1A02G017000; TraesCS1A02G118300; TraesCS1A02G235000; TraesCS1A02G382900; TraesCS1B02G128100; TraesCS1B02G248600; TraesCS1D02G119400; TraesCS1D02G218400; TraesCS1D02G237100; TraesCS2A02G065100; TraesCS2B02G112000; TraesCS2B02G599000; TraesCS2D02G095000; TraesCS2D02G320700; TraesCS2D02G593700; TraesCS3A02G485000; TraesCS4A02G138800; TraesCS4A02G315000; TraesCS4B02G158000; TraesCS4B02G180500;…
187	ko03013	RNA transport	59	3109	535	19303	0.999547	1	0.684703	TraesCS1A02G017000; TraesCS1A02G049300; TraesCS1B02G207100; TraesCS1B02G236100; TraesCS1D02G224400; TraesCS2A02G219000; TraesCS2A02G474500; TraesCS2A02G560400; TraesCS2B02G121200; TraesCS2B02G244400; TraesCS2B02G498100; TraesCS2B02G599000; TraesCS2D02G224400; TraesCS2D02G341200; TraesCS2D02G593700; TraesCS3A02G199400; TraesCS3A02G223900; TraesCS3A02G327200; TraesCS3A02G369100; TraesCS3B02G158900;…
188	ko04144	Endocytosis	53	3109	495	19303	0.999663	1	0.664775	TraesCS1A02G193000; TraesCS1B02G242500; TraesCS1D02G150400; TraesCS2A02G130800; TraesCS2A02G479000; TraesCS2D02G546200; TraesCS3A02G081400; TraesCS3A02G252800; TraesCS3B02G096400; TraesCS3B02G284600; TraesCS3B02G288900; TraesCS3D02G081300; TraesCS3D02G081400; TraesCS3D02G253500; TraesCS3D02G290000; TraesCS4A02G097900; TraesCS4A02G271600; TraesCS4A02G347800; TraesCS4B02G042400; TraesCS4B02G206700;…
189	ko04530	Tight junction	1	3109	68	19303	0.99991	1	0.0913051	TraesCS7A02G364400
190	ko04114	Oocyte meiosis	33	3109	380	19303	0.999986	1	0.539181	TraesCS1A02G118300; TraesCS1A02G308700; TraesCS1A02G382900; TraesCS1A02G435200; TraesCS1B02G128100; TraesCS1B02G370800; TraesCS1B02G370900; TraesCS1D02G119400; TraesCS1D02G226500; TraesCS1D02G308000; TraesCS1D02G402400; TraesCS2D02G341700; TraesCS2D02G343300; TraesCS3A02G208300; TraesCS3B02G566400; TraesCS3D02G509600; TraesCS4A02G315000; TraesCS4A02G379700; TraesCS4B02G353600; TraesCS4D02G023700;…
191	ko03050	Proteasome	9	3109	204	19303	1	1	0.273915	TraesCS5A02G109000; TraesCS6A02G177600; TraesCS6D02G166700; TraesCS7B02G254400; TraesCS7B02G316000; TraesCS7B02G468900; TraesCS7D02G062500; TraesCS7D02G532000; TraesCSU02G080700
192	ko03022	Basal transcription factors	6	3109	193	19303	1	1	0.193018	TraesCS3A02G429100; TraesCS3B02G466800; TraesCS3D02G424600; TraesCS6A02G242900; TraesCS6D02G077800; TraesCS6D02G237400
193	ko04120	Ubiquitin mediated proteolysis	44	3109	583	19303	1	1	0.468585	TraesCS1A02G264900; TraesCS1A02G388400; TraesCS1B02G275600; TraesCS1B02G415800; TraesCS1D02G104600; TraesCS1D02G125200; TraesCS1D02G226500; TraesCS1D02G265100; TraesCS1D02G396300; TraesCS2D02G341700; TraesCS3A02G027500; TraesCS3A02G028800; TraesCS3A02G048300; TraesCS3A02G186500; TraesCS3A02G210100; TraesCS3A02G269200; TraesCS3A02G527600; TraesCS3B02G183800; TraesCS3B02G216000; TraesCS3B02G240600;…
194	ko04141	Protein processing in endoplasmic reticulum	64	3109	836	19303	1	1	0.475311	TraesCS1A02G340400; TraesCS1D02G104600; TraesCS1D02G342400; TraesCS2A02G585600; TraesCS2D02G234100; TraesCS2D02G600900; TraesCS3A02G172900; TraesCS3A02G428800; TraesCS3A02G537600; TraesCS3B02G266900; TraesCS3B02G308200; TraesCS3B02G532200; TraesCS3B02G566400; TraesCS3D02G238700; TraesCS3D02G509600; TraesCS4A02G035500; TraesCS4A02G056500; TraesCS4A02G097900; TraesCS4A02G250800; TraesCS4A02G334800;…
195	ko03008	Ribosome biogenesis in eukaryotes	6	3109	309	19303	1	1	0.120558	TraesCS1B02G207100; TraesCS2A02G073800; TraesCS2A02G424900; TraesCS2B02G578600; TraesCS4D02G133300; TraesCS5D02G333400
196	ko03010	Ribosome	94	3109	1198	19303	1	1	0.487164	TraesCS1A02G001800; TraesCS1A02G166000; TraesCS1B02G182600; TraesCS1B02G182700; TraesCS1D02G003700; TraesCS1D02G114100; TraesCS1D02G174700; TraesCS1D02G228700; TraesCS2A02G172000; TraesCS2A02G563100; TraesCS2B02G310300; TraesCS2B02G623400; TraesCS2D02G179300; TraesCS2D02G458700; TraesCS2D02G572300; TraesCS2D02G580700; TraesCS3A02G206000; TraesCS3A02G226800; TraesCS3A02G268600; TraesCS3A02G272200;…
197	ko00190	Oxidative phosphorylation	50	3109	887	19303	1	1	0.349986	TraesCS1A02G019000; TraesCS1A02G107200; TraesCS1A02G273500; TraesCS1B02G283300; TraesCS1B02G413000; TraesCS1D02G107600; TraesCS1D02G273500; TraesCS2A02G223600; TraesCS2A02G502400; TraesCS2B02G264300; TraesCS2B02G273900; TraesCS2B02G530500; TraesCS2D02G229600; TraesCS2D02G503000; TraesCS3A02G201100; TraesCS3A02G210400; TraesCS3A02G238700; TraesCS3A02G250500; TraesCS3A02G287700; TraesCS3B02G224800;…
198	ko04340	Hedgehog signaling pathway	25	3109	616	19303	1	1	0.251978	TraesCS1A02G070700; TraesCS1A02G077200; TraesCS1A02G407700; TraesCS1B02G095200; TraesCS1D02G079300; TraesCS2A02G135800; TraesCS2B02G159700; TraesCS2B02G495400; TraesCS2B02G495900; TraesCS4A02G345500; TraesCS4B02G118500; TraesCS5A02G426700; TraesCS5B02G043200; TraesCS5B02G184200; TraesCS5B02G529300; TraesCS5D02G191200; TraesCS5D02G434700; TraesCS5D02G528400; TraesCS6A02G378000; TraesCS7A02G472200;…
199	ko04341	Hedgehog signaling pathway - fly	31	3109	717	19303	1	1	0.26844	TraesCS1A02G070700; TraesCS1A02G077200; TraesCS1A02G407700; TraesCS1B02G095200; TraesCS1D02G079300; TraesCS2A02G135800; TraesCS2B02G159700; TraesCS2B02G495400; TraesCS2B02G495900; TraesCS3B02G566400; TraesCS3D02G509600; TraesCS4A02G345500; TraesCS4A02G379700; TraesCS4B02G118500; TraesCS5A02G093500; TraesCS5A02G426700; TraesCS5B02G043200; TraesCS5B02G099600; TraesCS5B02G184200; TraesCS5B02G529300;…
200	ko03040	Spliceosome	34	3109	668	19303	1	1	0.316014	TraesCS1A02G243400; TraesCS1B02G278200; TraesCS1D02G267400; TraesCS2B02G198200; TraesCS2D02G238900; TraesCS3A02G260000; TraesCS3A02G416900; TraesCS3B02G293100; TraesCS3B02G409900; TraesCS3D02G260200; TraesCS4A02G097900; TraesCS4A02G138800; TraesCS4A02G141800; TraesCS4A02G176000; TraesCS4B02G038900; TraesCS4B02G158000; TraesCS4B02G206700; TraesCS4D02G136700; TraesCS4D02G167200; TraesCS4D02G207500;…
