# Supplementary material for: Transcriptomics Analysis of Wheat Tassel Response to Tilletia laevis Kühn, Which Causes Common Bunt of Wheat
Source: Front Plant Sci. 2022 Feb 22;13:823907. doi: 10.3389/fpls.2022.823907 (PMC8902468; doi:10.3389/fpls.2022.823907)
Supplement: Supplementary file 4 [file Table_4.xlsx]

## Sheet: Defense related
Table S4. Differential expression of defense related genes in wheat tassels after T. foetida infection
Number	Gene_id	Fold Change	log2FoldChange	pval	up_down	gene_symbol	description	GO_id
	Pathogenesis-related protein
1	TraesCS5A02G439700	21.3342	4.41509	0.00251175	up		Pathogenesis-related protein 1-9	GO:0005576
2	TraesCS5B02G181500	45.54	5.50906	3.28e-07	up		Pathogenesis-related protein 1-1	GO:0005576
3	TraesCS5A02G439800	137.718	7.10557	0.0318034	up		Pathogenesis-related protein 1-19	GO:0005576
4	TraesCS5B02G443400	345.243	8.43147	0.0056754	up		Pathogenesis-related protein 1-7	GO:0005576
5	TraesCS5B02G442900	3092.52	11.5946	0.00105105	up		Pathogenesis-related protein 1-6	GO:0005576
6	TraesCS5D02G446900	Inf	Inf	0.0368411	up		Pathogenesis-related protein 1-16	GO:0005576
	Thaumatin-like protein
1	TraesCS5A02G017900	2.6413	1.40125	0.031415	up	tlp	Thaumatin-like protein
2	TraesCS4A02G498000	82.1624	6.36041	0.00515243	up	Os12g0628600	Thaumatin-like protein
3	TraesCS7D02G551400	12.8867	3.68781	0.156003	up		Thaumatin-like protein PWIR2	GO:0006952,GO:0009607,GO:0016787,GO:0016798,GO:0008152,GO:0052861,GO:0052862
	Chitinase
1	TraesCS3D02G260300	6.13648	2.61741	0.0181124	up		Chitinase	GO:0005975,GO:0008061,GO:0004568,GO:0006032,GO:0016998,GO:0016787,GO:0016798,GO:0008152
2	TraesCS2D02G349400	45.6939	5.51393	0.000421436	up	Cht4	Chitinase II	GO:0005975,GO:0004568,GO:0006032,GO:0016998
3	TraesCS2B02G369100	55.5641	5.79608	0.0029706	up	Cht5	Chitinase IV	GO:0005975,GO:0008061,GO:0004568,GO:0006032,GO:0016998
	Peroxidase
1	TraesCS6A02G324200	0.0112559	-6.47318	5.91e-07	Down	PER56	Peroxidase	GO:0004601,GO:0020037,GO:0006979,GO:0042744,GO:0055114
2	TraesCS4A02G201700	0.011261	-6.47252	1.1e-10	Down	PER43	Peroxidase	GO:0046872,GO:0004601,GO:0020037,GO:0006979,GO:0005576,GO:0042744,GO:0055114
3	TraesCS4B02G176900	0.0114006	-6.45474	3.8e-05	Down	PER70	Peroxidase	GO:0046872,GO:0004601,GO:0020037,GO:0006979,GO:0005576,GO:0042744,GO:0055114
4	TraesCS5A02G516300	0.013196	-6.24376	3.16e-08	Down	GSVIVT00037159001	Peroxidase	GO:0046872,GO:0004601,GO:0020037,GO:0006979,GO:0005576,GO:0042744,GO:0055114
5	TraesCS2B02G615100	0.0148716	-6.0713	0.0244919	Down	Sb03g046810	Peroxidase	GO:0046872,GO:0004601,GO:0020037,GO:0006979,GO:0005576,GO:0042744,GO:0055114
6	TraesCS2D02G352500	0.0153354	-6.02699	1.2e-08	Down	PER43	Peroxidase	GO:0046872,GO:0004601,GO:0020037,GO:0006979,GO:0005576,GO:0042744,GO:0055114,GO:0016491,GO:0098869
7	TraesCS4B02G105800	0.0157882	-5.98501	0.000257016	Down	PER43	Peroxidase	GO:0046872,GO:0004601,GO:0020037,GO:0006979,GO:0005576,GO:0042744,GO:0055114
8	TraesCS2A02G355800	0.0165702	-5.91527	4.5e-06	Down	PER43	Peroxidase	GO:0046872,GO:0004601,GO:0020037,GO:0006979,GO:0005576,GO:0042744,GO:0055114
9	TraesCS2B02G372500	0.0192963	-5.69553	0.000543636	Down	PER43	Peroxidase	GO:0046872,GO:0004601,GO:0020037,GO:0006979,GO:0005576,GO:0042744,GO:0055114
10	TraesCS7D02G066400	0.0234953	-5.41148	8.03e-09	Down	Sb03g046810	Peroxidase	GO:0046872,GO:0004601,GO:0020037,GO:0006979,GO:0005576,GO:0042744,GO:0055114,GO:0016491,GO:0098869
11	TraesCS4A02G419300	0.0241392	-5.37248	1.12e-08	Down	Sb03g046810	Peroxidase	GO:0004601,GO:0020037,GO:0006979,GO:0042744,GO:0055114
12	TraesCS6B02G042500	0.0259295	-5.26926	3.25e-08	Down	PER45	Peroxidase	GO:0004601,GO:0020037,GO:0006979,GO:0042744,GO:0055114
13	TraesCS2D02G107900	0.0273063	-5.19462	0.0224274	Down		Peroxidase	GO:0046872,GO:0004601,GO:0020037,GO:0006979,GO:0005576,GO:0042744,GO:0055114,GO:0016491,GO:0098869
14	TraesCS6A02G029800	0.039296	-4.66947	8.35e-07	Down	PER45	Peroxidase	GO:0004601,GO:0020037,GO:0006979,GO:0042744,GO:0055114,GO:0046872
15	TraesCS2B02G125800	0.0453752	-4.46195	0.0233096	Down	PRX112	Peroxidase	GO:0046872,GO:0004601,GO:0020037,GO:0006979,GO:0005576,GO:0042744,GO:0055114
16	TraesCS2A02G573500	0.0474618	-4.39709	0.000236333	Down	PER12	Peroxidase	GO:0046872,GO:0004601,GO:0020037,GO:0006979,GO:0005576,GO:0042744,GO:0055114
17	TraesCS3D02G516900	0.0475982	-4.39295	0.00396749	Down	Sb03g046810	Peroxidase	GO:0004601,GO:0020037,GO:0006979,GO:0042744,GO:0055114
18	TraesCS6D02G034200	0.0477254	-4.3891	6.3e-06	Down	PER45	Peroxidase	GO:0046872,GO:0004601,GO:0020037,GO:0006979,GO:0042744,GO:0055114
19	TraesCS2B02G124300	0.0540802	-4.20875	0.000108918	Down	PNC1	Peroxidase	GO:0046872,GO:0004601,GO:0020037,GO:0006979,GO:0005576,GO:0042744,GO:0055114
20	TraesCS7A02G070900	0.0575733	-4.11846	0.00036772	Down	Sb03g046810	Peroxidase	GO:0004601,GO:0020037,GO:0006979,GO:0042744,GO:0055114
21	TraesCS7A02G262000	0.0591876	-4.07856	0.00483475	Down	PER55	Peroxidase	GO:0046872,GO:0004601,GO:0020037,GO:0006979,GO:0005576,GO:0042744,GO:0055114
22	TraesCS4D02G342600	0.0627163	-3.99501	0.000217451	Down	GSVIVT00037159001	Peroxidase	GO:0046872,GO:0004601,GO:0020037,GO:0006979,GO:0005576,GO:0042744,GO:0055114
23	TraesCS5A02G288200	0.0628823	-3.9912	0.0339775	Down	PER55	Peroxidase	GO:0046872,GO:0004601,GO:0020037,GO:0006979,GO:0005576,GO:0042744,GO:0055114
24	TraesCS2B02G530200	0.0629112	-3.99054	0.00141068	Down	PER50	Peroxidase	GO:0046872,GO:0004601,GO:0020037,GO:0006979,GO:0005576,GO:0042744,GO:0055114
25	TraesCS2A02G333500	0.07112	-3.8136	0.00253963	Down	PER41	Peroxidase	GO:0004601,GO:0020037,GO:0006979,GO:0042744,GO:0055114
26	TraesCS2B02G489800	0.0763156	-3.71188	0.0125122	Down	PER64	Peroxidase	GO:0046872,GO:0004601,GO:0020037,GO:0006979,GO:0005576,GO:0042744,GO:0055114,GO:0009505
27	TraesCS5A02G400600	0.0768657	-3.70152	0.000203523	Down	PER35	Peroxidase	GO:0046872,GO:0004601,GO:0020037,GO:0006979,GO:0005576,GO:0042744,GO:0055114
28	TraesCS4B02G347700	0.0850921	-3.55483	0.0154028	Down	GSVIVT00037159001	Peroxidase	GO:0046872,GO:0004601,GO:0020037,GO:0006979,GO:0005576,GO:0042744,GO:0055114
29	TraesCS6B02G042600	0.0854917	-3.54807	0.0284631	Down	PER45	Peroxidase	GO:0004601,GO:0020037,GO:0006979,GO:0042744,GO:0055114
30	TraesCS7B02G159300	0.0933188	-3.42169	0.0343039	Down	PER55	Peroxidase	GO:0046872,GO:0004601,GO:0020037,GO:0006979,GO:0005576,GO:0042744,GO:0055114
31	TraesCS1A02G319000	0.095877	-3.38267	0.0114744	Down	PRX74	Peroxidase	GO:0004601,GO:0020037,GO:0006979,GO:0042744,GO:0055114
32	TraesCS2D02G467000	0.102033	-3.29289	0.0144308	Down	PER64	Peroxidase	GO:0004601,GO:0020037,GO:0006979,GO:0042744,GO:0055114
33	TraesCS5D02G410600	0.1025	-3.2863	0.00132122	Down	PER35	Peroxidase	GO:0046872,GO:0004601,GO:0020037,GO:0006979,GO:0005576,GO:0042744,GO:0055114
34	TraesCS2A02G573700	0.10323	-3.27606	0.048613	Down	Sb03g046810	Peroxidase	GO:0046872,GO:0004601,GO:0020037,GO:0006979,GO:0005576,GO:0042744,GO:0055114
35	TraesCS3B02G215500	0.113975	-3.13321	0.00560721	Down	PRX74	Peroxidase	GO:0004601,GO:0020037,GO:0006979,GO:0042744,GO:0055114
36	TraesCS4D02G117100	0.116459	-3.10211	0.0193758	Down	GSVIVT00023967001	Peroxidase	GO:0046872,GO:0004601,GO:0020037,GO:0006979,GO:0005576,GO:0042744,GO:0055114
37	TraesCS3D02G189900	0.13053	-2.93754	0.0037609	Down	PRX74	Peroxidase	GO:0046872,GO:0004601,GO:0020037,GO:0006979,GO:0005576,GO:0042744,GO:0055114
38	TraesCS3D02G244200	0.136872	-2.8691	0.033496	Down	PER19	Peroxidase	GO:0046872,GO:0004601,GO:0020037,GO:0006979,GO:0005576,GO:0042744,GO:0055114
39	TraesCS2D02G327700	0.139694	-2.83966	0.0260973	Down	PER41	Peroxidase	GO:0004601,GO:0020037,GO:0006979,GO:0042744,GO:0055114
40	TraesCS2D02G153100	0.141579	-2.82032	0.0138996	Down	PER2	Peroxidase	GO:0046872,GO:0004601,GO:0020037,GO:0006979,GO:0042744,GO:0055114,GO:0016491,GO:0005576,GO:0098869
41	TraesCS2B02G278500	0.150559	-2.7316	0.0444278	Down	PER51	Peroxidase	GO:0046872,GO:0004601,GO:0020037,GO:0006979,GO:0005576,GO:0042744,GO:0055114
42	TraesCS1D02G318800	0.150926	-2.72809	0.0146169	Down	PRX74	Peroxidase	GO:0004601,GO:0020037,GO:0006979,GO:0042744,GO:0055114
43	TraesCS5B02G147200	0.154574	-2.69363	0.0320812	Down	GSVIVT00023967001	Peroxidase	GO:0046872,GO:0004601,GO:0020037,GO:0006979,GO:0005576,GO:0042744,GO:0055114
44	TraesCS2A02G502100	0.157357	-2.66788	0.0341333	Down	PER50	Peroxidase	GO:0046872,GO:0004601,GO:0020037,GO:0006979,GO:0005576,GO:0042744,GO:0055114,GO:0016491,GO:0098869
45	TraesCS2D02G502600	0.168164	-2.57206	0.0449978	Down	PER50	Peroxidase	GO:0046872,GO:0004601,GO:0020037,GO:0006979,GO:0005576,GO:0042744,GO:0055114
46	TraesCS1B02G331300	0.170303	-2.55382	0.0272873	Down	PRX74	Peroxidase	GO:0046872,GO:0004601,GO:0020037,GO:0006979,GO:0005576,GO:0042744,GO:0055114
47	TraesCS5B02G405400	0.173099	-2.53033	0.00926461	Down	PER35	Peroxidase	GO:0046872,GO:0004601,GO:0020037,GO:0006979,GO:0005576,GO:0042744,GO:0055114
48	TraesCS2B02G346800	0.209983	-2.25165	0.04352	Down	PER65	Peroxidase	GO:0004601,GO:0020037,GO:0006979,GO:0042744,GO:0055114
49	TraesCS6A02G118300	0.217051	-2.2039	0.0296546	Down	PER70	Peroxidase	GO:0004601,GO:0020037,GO:0006979,GO:0042744,GO:0055114
50	TraesCS6B02G146500	0.222516	-2.16802	0.0452851	Down	PER70	Peroxidase	GO:0046872,GO:0004601,GO:0020037,GO:0006979,GO:0005576,GO:0042744,GO:0055114
51	TraesCS2D02G584700	0.234053	-2.09509	0.0421398	Down	PER12	Peroxidase	GO:0046872,GO:0004601,GO:0020037,GO:0006979,GO:0005576,GO:0042744,GO:0055114,GO:0016491,GO:0098869
52	TraesCS4D02G116600	0.274984	-1.86258	0.0366659	Down	GSVIVT00023967001	Peroxidase	GO:0046872,GO:0004601,GO:0020037,GO:0006979,GO:0005576,GO:0042744,GO:0055114
53	TraesCS1B02G095800	4.07956	2.02841	0.0478639	Up	PER2	Peroxidase	GO:0046872,GO:0004601,GO:0020037,GO:0006979,GO:0005576,GO:0042744,GO:0055114
54	TraesCS1A02G077700	5.55073	2.47268	0.00179201	Up	PER2	Peroxidase	GO:0046872,GO:0004601,GO:0020037,GO:0006979,GO:0005576,GO:0042744,GO:0055114
55	TraesCS6B02G333800	5.7267	2.5177	0.0036478	Up	PER72	Peroxidase	GO:0046872,GO:0004601,GO:0020037,GO:0006979,GO:0005576,GO:0042744,GO:0055114
56	TraesCS7B02G099800	7.23639	2.85527	0.00912153	Up	PRX74	Peroxidase	GO:0046872,GO:0004601,GO:0020037,GO:0006979,GO:0005576,GO:0042744,GO:0055114
57	TraesCS7D02G420500	7.555	2.91743	0.000233886	Up	PER16	Peroxidase	GO:0004601,GO:0020037,GO:0006979,GO:0042744,GO:0055114
58	TraesCS5B02G405300	9.10477	3.18662	0.0133175	Up	PER50	Peroxidase	GO:0046872,GO:0004601,GO:0020037,GO:0006979,GO:0005576,GO:0042744,GO:0055114
59	TraesCS3A02G325100	9.29355	3.21623	0.000168103	Up	PRX74	Peroxidase	GO:0004601,GO:0020037,GO:0006979,GO:0055114,GO:0042744
60	TraesCS5D02G410500	12.0588	3.59201	0.00919878	Up	PER50	Peroxidase	GO:0046872,GO:0004601,GO:0020037,GO:0006979,GO:0005576,GO:0042744,GO:0055114
61	TraesCS2B02G615600	12.6355	3.65941	0.00555356	Up	Sb03g046810	Peroxidase	GO:0004601,GO:0020037,GO:0006979,GO:0042744,GO:0055114
62	TraesCS2D02G583200	14.0109	3.80848	3e-05	Up	Sb03g046810	Peroxidase	GO:0046872,GO:0004601,GO:0020037,GO:0006979,GO:0005576,GO:0042744,GO:0055114,GO:0016491,GO:0098869
63	TraesCS6D02G284700	15.9996	3.99997	5.44e-05	Up	PER72	Peroxidase	GO:0046872,GO:0004601,GO:0020037,GO:0006979,GO:0005576,GO:0042744,GO:0055114
64	TraesCS3B02G354000	16.4742	4.04213	7.74e-05	Up	PER56	Peroxidase	GO:0046872,GO:0004601,GO:0020037,GO:0006979,GO:0005576,GO:0042744,GO:0055114,GO:0016491,GO:0098869
65	TraesCS3D02G518200	18.3858	4.20052	0.00303772	Up	Sb03g046810	Peroxidase	GO:0004601,GO:0020037,GO:0006979,GO:0042744,GO:0055114
66	TraesCS3D02G318500	25.9956	4.7002	4e-08	Up	PER56	Peroxidase	GO:0046872,GO:0004601,GO:0020037,GO:0006979,GO:0005576,GO:0042744,GO:0055114
67	TraesCS7B02G251100	27.0318	4.75659	0.0446933	Up	PER1	Peroxidase	GO:0046872,GO:0004601,GO:0020037,GO:0006979,GO:0005576,GO:0042744,GO:0055114
68	TraesCS3A02G297100	30.6335	4.93704	0.00210794	Up	PER2	Peroxidase	GO:0046872,GO:0004601,GO:0020037,GO:0006979,GO:0005576,GO:0042744,GO:0055114
69	TraesCS4B02G233000	32.8377	5.03728	0.0167001	Up	pod	Peroxidase	GO:0046872,GO:0004601,GO:0020037,GO:0006979,GO:0005576,GO:0042744,GO:0055114
70	TraesCS3A02G297200	51.2095	5.67834	1.25e-06	Up	PER2	Peroxidase	GO:0046872,GO:0004601,GO:0020037,GO:0006979,GO:0005576,GO:0042744,GO:0055114
71	TraesCS5D02G046500	72.1929	6.17379	0.00297675	Up	PER2	Peroxidase	GO:0004601,GO:0020037,GO:0006979,GO:0042744,GO:0055114
72	TraesCS6D02G054400	121.336	6.92286	0.00683913	Up	PER70	Peroxidase	GO:0046872,GO:0004601,GO:0020037,GO:0006979,GO:0005576,GO:0042744,GO:0055114
73	TraesCS3D02G305300	528.676	9.04624	1.14e-07	Up	PER2	Peroxidase	GO:0046872,GO:0004601,GO:0020037,GO:0006979,GO:0005576,GO:0042744,GO:0055114
74	TraesCS1A02G342000	Inf	Inf	0.0389703	Up	PER2	Peroxidase	GO:0046872,GO:0004601,GO:0020037,GO:0006979,GO:0005576,GO:0042744,GO:0055114
75	TraesCS3A02G412400	Inf	Inf	0.0121814	Up	pod	Peroxidase	GO:0004601,GO:0020037,GO:0006979,GO:0042744,GO:0055114
76	TraesCS3B02G446500	Inf	Inf	0.000364332	Up	pod	Peroxidase	GO:0046872,GO:0004601,GO:0020037,GO:0006979,GO:0005576,GO:0042744,GO:0055114,GO:0016491,GO:0098869
77	TraesCS3D02G407200	Inf	Inf	0.0321127	Up	pod	Peroxidase	GO:0046872,GO:0004601,GO:0020037,GO:0006979,GO:0005576,GO:0042744,GO:0055114
78	TraesCS1D02G080300	0	-Inf	0.00244079	Down	GSVIVT00037159001	Peroxidase	GO:0046872,GO:0004601,GO:0020037,GO:0006979,GO:0005576,GO:0042744,GO:0055114
79	TraesCS2B02G614100	0	-Inf	0.00856573	Down	PER12	Peroxidase	GO:0004601,GO:0020037,GO:0006979,GO:0055114,GO:0046872,GO:0005576,GO:0042744
80	TraesCS2D02G583700	0	-Inf	0.0275598	Down	Sb03g046810	Peroxidase	GO:0046872,GO:0004601,GO:0020037,GO:0006979,GO:0005576,GO:0042744,GO:0055114,GO:0016491,GO:0098869
81	TraesCS3A02G180000	0	-Inf	0.00115033	Down	PER72	Peroxidase	GO:0004601,GO:0020037,GO:0006979,GO:0042744,GO:0055114
82	TraesCS4D02G102600	0	-Inf	0.00183247	Down	PER43	Peroxidase	GO:0046872,GO:0004601,GO:0020037,GO:0006979,GO:0005576,GO:0042744,GO:0055114
83	TraesCS4D02G178600	0	-Inf	0.00354336	Down	PER70	Peroxidase	GO:0046872,GO:0004601,GO:0020037,GO:0006979,GO:0005576,GO:0042744,GO:0055114
84	TraesCS6D02G054900	0	-Inf	0.047584	Down	PER70	Peroxidase	GO:0046872,GO:0004601,GO:0020037,GO:0006979,GO:0005576,GO:0042744,GO:0055114
85	TraesCS6D02G303900	0	-Inf	0.0032564	Down	PER56	Peroxidase	GO:0046872,GO:0004601,GO:0020037,GO:0006979,GO:0005576,GO:0042744,GO:0055114
86	TraesCS7D02G442200	0	-Inf	0.0257317	Down	PER39	Peroxidase	GO:0046872,GO:0004601,GO:0020037,GO:0006979,GO:0005576,GO:0042744,GO:0055114
	Glucanase
1	TraesCS6A02G093200	0.00302495	-8.36887	0.0276422	Down	GLU4	Endoglucanase [Source:UniProtKB/TrEMBL;Acc:A0A1D6ADY9]	GO:0004553,GO:0005975,GO:0003824,GO:0030245,GO:0008810
2	TraesCS4D02G065600	0.0498128	-4.32734	3.54e-06	Down	GLU2	Endoglucanase [Source:UniProtKB/TrEMBL;Acc:W5ESB9]	GO:0004553,GO:0005975,GO:0016021,GO:0003824,GO:0030245,GO:0008810,GO:0016787,GO:0016020,GO:0016798,GO:0008152,GO:0000272
3	TraesCS4B02G066700	0.0775772	-3.68822	8.81e-05	Down	GLU2	Endoglucanase [Source:UniProtKB/TrEMBL;Acc:A0A1D5XUQ1]	GO:0004553,GO:0005975,GO:0016021,GO:0003824,GO:0030245,GO:0008810
4	TraesCS4A02G248200	0.102452	-3.28698	0.000250707	Down	GLU2	Endoglucanase [Source:UniProtKB/TrEMBL;Acc:W5DL54]	GO:0004553,GO:0005975,GO:0016021,GO:0003824,GO:0030245,GO:0008810
5	TraesCS5D02G208900	0.118468	-3.07743	0.00146821	Down	GLU11	Endoglucanase [Source:UniProtKB/TrEMBL;Acc:A0A1D6S5B6]	GO:0004553,GO:0005975,GO:0003824,GO:0030245,GO:0008810
6	TraesCS5A02G202600	0.122729	-3.02645	0.0015105	Down	GLU11	Endoglucanase [Source:UniProtKB/TrEMBL;Acc:A0A1D5YQ71]	GO:0004553,GO:0005975,GO:0003824,GO:0030245,GO:0008810
7	TraesCS5B02G201100	0.14038	-2.83259	0.00532722	Down	GLU11	Endoglucanase [Source:UniProtKB/TrEMBL;Acc:W5F9C4]	GO:0004553,GO:0005975,GO:0003824,GO:0030245,GO:0008810
8	TraesCS6D02G291800	5.67606	2.50489	0.00165365	Up	GLU10	Endoglucanase [Source:UniProtKB/TrEMBL;Acc:A0A1D6B739]	GO:0004553,GO:0005975,GO:0003824,GO:0030245,GO:0008810
9	TraesCS6B02G342600	7.00086	2.80753	0.000431828	Up	GLU10	Endoglucanase [Source:UniProtKB/TrEMBL;Acc:A0A1D6AT76]	GO:0004553,GO:0005975,GO:0003824,GO:0030245,GO:0008810
10	TraesCS6A02G312400	10.7823	3.4306	0.0011377	Up	GLU10	Endoglucanase [Source:UniProtKB/TrEMBL;Acc:A0A1D6ABE6]	GO:0004553,GO:0005975,GO:0003824,GO:0030245,GO:0008810
11	TraesCS7B02G104600	11.7395	3.5533	0.000346707	Up	GLU10	Endoglucanase [Source:UniProtKB/TrEMBL;Acc:A0A1D6CJY3]	GO:0004553,GO:0005975,GO:0003824,GO:0030245,GO:0008810
12	TraesCS1D02G074700	13.375	3.74147	4.43e-05	Up	Os05g0129200	Endoglucanase [Source:UniProtKB/TrEMBL;Acc:A0A1D5T4H7]	GO:0004553,GO:0005975,GO:0003824,GO:0030245,GO:0008810
13	TraesCS1A02G072100	13.6278	3.76848	0.000548304	Up	Os05g0129200	Endoglucanase [Source:UniProtKB/TrEMBL;Acc:A0A1D5S0J4]	GO:0004553,GO:0005975,GO:0003824,GO:0030245,GO:0008810
14	TraesCS3A02G483000	22.6821	4.50348	0.0199371	Up		Beta-1,3-glucanase [Source:UniProtKB/TrEMBL;Acc:Q4JH28]	GO:0004553,GO:0005975,GO:0042973,GO:0016787,GO:0016798,GO:0008152
15	TraesCS6D02G275900	0	-Inf	0.00172098	Down	Os02g0733300	Endoglucanase [Source:UniProtKB/TrEMBL;Acc:A0A1D6B945]	GO:0004553,GO:0005975,GO:0003824,GO:0030245,GO:0008810
