# Supplementary material for: Transcriptomics Analysis of Wheat Tassel Response to Tilletia laevis Kühn, Which Causes Common Bunt of Wheat
Source: Front Plant Sci. 2022 Feb 22;13:823907. doi: 10.3389/fpls.2022.823907 (PMC8902468; doi:10.3389/fpls.2022.823907)
Supplement: Supplementary file 5 [file Table_5.xlsx]

## Sheet: Sheet1
Table S5. Differential expression of MYB transcription factor in wheat tassels after T. foetida infection
Number	Gene_id	Fold Change	log2FoldChange	pval	up_down	gene_symbol	description	GO_id
1	TraesCS1A02G129300	0.0116122	-6.42822	0.000304343	Down	MYB3R4	R1R2R3-MYB protein	GO:0003677,GO:0005634
2	TraesCS3B02G612200	0.117605	-3.08798	0.00253068	Down	MYBAS2	MYB proteinBL	GO:0003677
3	TraesCS3A02G535100	0.147342	-2.76276	0.0023832	Down	MYBAS2	MYB13 transcription factor	GO:0003677
4	TraesCS3D02G540600	0.245521	-2.02608	0.026901	Down	MYBAS2	MYB-related protein	GO:0003677
5	TraesCS3D02G377300	4.16499	2.05831	0.0119306	Up	MYB330	R2R3-MYB protein	GO:0003677,GO:0005634
6	TraesCS6B02G288500	4.37377	2.12888	0.0163249	Up	RVE1	MYB-related protein	GO:0005634,GO:0003677
7	TraesCS7B02G144300	4.82826	2.2715	0.0247251	Up		MYB-related protein	GO:0005515
8	TraesCS6B02G257000	5.55275	2.4732	0.0490251	Up	MYB30	Myb33	GO:0003677,GO:0005634
9	TraesCS4A02G452600	7.9947	2.99904	0.0284143	Up	MYBS1	MYB-related protein	GO:0005634,GO:0003677
10	TraesCS6A02G224400	9.56715	3.25809	0.000773529	Up	MYB30	MYB33	GO:0003677,GO:0005634
11	TraesCS2D02G209600	10.1971	3.35008	0.0470983	Up	MYB102	MYB transcription factor 74	GO:0003677,GO:0005634
12	TraesCS6D02G211400	43.7673	5.45178	0.00823198	Up	MYB30	MYB73	GO:0003677,GO:0005634
13	TraesCS5A02G087100	59.2455	5.88863	1.48e-09	Up	JAMYB	MYB transcription factor 79	GO:0003677
14	TraesCS2A02G206400	65.1509	6.02571	0.0175364	Up	MYB102	MYB transcription factor 80	GO:0003677,GO:0005634
