# Supplementary material for: Transcriptomics Analysis of Wheat Tassel Response to Tilletia laevis Kühn, Which Causes Common Bunt of Wheat
Source: Frontiers journal article supplement (doi:10.3389/fpls.2022.823907), 2022-02-22
Supplement: Table_2.xlsx [file Table_2.xlsx]

## Sheet: up-regulated
Table S3. Differentially expressed genes in T. foetida infected and control plants.
Number	gene_id	baseMean	baseMean_control_control	baseMean_case_infected	foldChange	log2FoldChange	pval	padj	up_down	expression_control1	expression_control2	expression_control3	expression_infected1	expression_infected2	expression_infected3	gene_symbol	description	GO_id	GO_term	pathway	pathway_description
1	TraesCS2D02G119700	158.311	95.1392	221.482	2.32798	1.21908	0.0466825	0.245517	Up	3.10154	2.92061	3.0097	3.62602	6.86538	12.9597	SRC2
2	TraesCS7D02G389700	528.896	308.417	749.375	2.42975	1.28081	0.0363046	0.20985	Up	36.5929	18.6084	8.75405	35.1671	44.8166	101.825	PRXIIE-1		GO:0016491,GO:0045454,GO:0005623	oxidoreductase activity|cell redox homeostasis|cell
3	TraesCS3A02G158600	316.813	181.408	452.219	2.49283	1.31779	0.0494297	0.254024	Up	3.62918	3.70177	3.73347	5.39638	10.1866	12.4599	BHLH13		GO:0046983	protein dimerization activity
4	TraesCS4A02G406200	1076.8	615.314	1538.28	2.49999	1.32192	0.0398014	0.222609	Up	13.3983	18.7295	22.4143	29.8268	33.02	101.874	At1g22440		GO:0016491,GO:0008270,GO:0055114	oxidoreductase activity|zinc ion binding|oxidation-reduction process	ko00982,ko00980,ko00680,ko01220,ko00071,ko00626,ko00350,ko01200,ko00830,ko00625,ko00010	Drug metabolism - cytochrome P450|Metabolism of xenobiotics by cytochrome P450|Methane metabolism|Degradation of aromatic compounds|Fatty acid degradation|Naphthalene degradation|Tyrosine metabolism|Carbon metabolism|Retinol metabolism|Chloroalkane and chloroalkene degradation|Glycolysis / Gluconeogenesis
5	TraesCS4D02G210700	132.881	75.6841	190.078	2.51146	1.32853	0.0479306	0.249327	Up	7.00948	2.0549	2.88601	5.59408	10.8409	15.7382	At5g06060		GO:0016491	oxidoreductase activity	ko00960	Tropane, piperidine and pyridine alkaloid biosynthesis
6	TraesCS1B02G337400	210.714	119.862	301.565	2.51593	1.33109	0.0480721	0.24969	Up	2.96043	4.70185	6.30537	8.85693	12.678	17.1898	SDI1		GO:0009658,GO:0010438,GO:0010439,GO:0005515	chloroplast organization|cellular response to sulfur starvation|regulation of glucosinolate biosynthetic process|protein binding
7	TraesCS7B02G113600	196.005	111.24	280.771	2.52402	1.33572	0.0405033	0.224971	Up	3.06991	1.31768	1.92753	2.34591	6.22506	8.47961	NPF3.1		GO:0016021,GO:0005886,GO:0022857,GO:0016020,GO:0055085,GO:0097708,GO:0010336	integral component of membrane|plasma membrane|transmembrane transporter activity|membrane|transmembrane transport|intracellular vesicle|gibberellic acid homeostasis
8	TraesCS3D02G445400	371.669	209.139	534.198	2.55428	1.35292	0.0406239	0.225275	Up	10.3066	11.3036	13.0903	22.9938	35.9657	46.4766	GST3		GO:0016740,GO:0004364,GO:0005515	transferase activity|glutathione transferase activity|protein binding	ko00982,ko00480,ko00980	Drug metabolism - cytochrome P450|Glutathione metabolism|Metabolism of xenobiotics by cytochrome P450
9	TraesCS7D02G265900	716.397	401.518	1031.28	2.56844	1.36089	0.0302099	0.18701	Up	28.5814	13.5572	11.8982	31.6404	40.4444	83.1041	SPDSYN1		GO:0016740,GO:0003824,GO:0006596,GO:0006595	transferase activity|catalytic activity|polyamine biosynthetic process|polyamine metabolic process	ko00330,ko00410,ko00480,ko00270	Arginine and proline metabolism|beta-Alanine metabolism|Glutathione metabolism|Cysteine and methionine metabolism
10	TraesCS6B02G117300	115.287	64.379	166.195	2.58151	1.36821	0.036913	0.212127	Up	11.9598	2.99611	8.47055	12.4844	24.9524	39.2481			GO:0098869	cellular oxidant detoxification
11	TraesCS3B02G025200	664.662	370.433	958.891	2.58857	1.37216	0.0412477	0.227396	Up	9.31924	9.8215	16.2796	23.0893	28.8957	41.6193	FBA3		GO:0003824,GO:0006096,GO:0004332	catalytic activity|glycolytic process|fructose-bisphosphate aldolase activity	ko00710,ko00680,ko01200,ko01230,ko00030,ko00051,ko00010	Carbon fixation in photosynthetic organisms|Methane metabolism|Carbon metabolism|Biosynthesis of amino acids|Pentose phosphate pathway|Fructose and mannose metabolism|Glycolysis / Gluconeogenesis
12	TraesCS3D02G431700	491.906	273.799	710.013	2.5932	1.37473	0.048486	0.251124	Up	15.5797	10.8884	13.5427	18.2937	61.6002	45.5156	NAC083		GO:0005634,GO:0003677,GO:0006355	nucleus|DNA binding|regulation of transcription, DNA-templated
13	TraesCS7B02G168100	559.133	310.926	807.34	2.59657	1.37661	0.0400676	0.223443	Up	12.7816	12.0165	15.3265	23.5841	36.4957	47.0304	RBL1	Rhomboid-like protein [Source:UniProtKB/TrEMBL;Acc:A0A1D6CE75]	GO:0016021,GO:0004252,GO:0006508	integral component of membrane|serine-type endopeptidase activity|proteolysis
14	TraesCS6B02G197300	914.73	504.264	1325.2	2.62798	1.39396	0.0434607	0.234939	Up	24.7048	14.1976	12.7593	37.0394	40.2084	61.0663	SAMS	S-adenosylmethionine synthase [Source:UniProtKB/TrEMBL;Acc:W5GBW4]	GO:0046872,GO:0005524,GO:0006556,GO:0006730,GO:0004478,GO:0000166,GO:0016740	metal ion binding|ATP binding|S-adenosylmethionine biosynthetic process|one-carbon metabolic process|methionine adenosyltransferase activity|nucleotide binding|transferase activity	ko01230,ko00270	Biosynthesis of amino acids|Cysteine and methionine metabolism
15	TraesCS5A02G017900	2377.02	1305.59	3448.46	2.6413	1.40125	0.031415	0.191475	Up	146.783	125.208	62.5257	284.596	177.633	446.867	tlp	Thaumatin-like protein [Source:UniProtKB/TrEMBL;Acc:Q8S4P7]
16	TraesCS3D02G287000	99.3814	54.4836	144.279	2.64812	1.40497	0.0345268	0.203137	Up	4.6759	4.58425	1.83944	9.64496	5.33471	15.8026	At1g17710		GO:0016791	phosphatase activity	ko00564	Glycerophospholipid metabolism
17	TraesCS3D02G219100	145.378	79.4588	211.296	2.65919	1.41099	0.0358568	0.208125	Up	2.79411	2.21689	2.09735	3.21592	6.85376	9.00989	BAT1		GO:0016021,GO:0022857,GO:0016020,GO:0055085,GO:0006865	integral component of membrane|transmembrane transporter activity|membrane|transmembrane transport|amino acid transport
18	TraesCS5B02G108100	80.9964	44.2631	117.73	2.65977	1.4113	0.0448924	0.239702	Up	1.79407	3.33111	5.74382	7.46174	6.37812	13.0725
19	TraesCS3D02G388000	49.9356	27.2778	72.5935	2.66127	1.41212	0.0414446	0.228042	Up	0.269964	0.830366	0.916347	1.53856	1.70749	3.48031	4CLL5		GO:0003824	catalytic activity
20	TraesCS4A02G055900	145.697	79.3553	212.038	2.672	1.41792	0.0463161	0.24443	Up	7.21111	5.29504	5.39298	17.2998	13.1633	23.8383
21	TraesCS5B02G431200	70.6319	38.1756	103.088	2.70037	1.43316	0.0383835	0.217442	Up	2.00271	1.38691	1.81097	1.91103	6.77521	7.69363	PUP1		GO:0016021,GO:0005215	integral component of membrane|transporter activity
22	TraesCS4D02G014300	355.85	192.171	519.528	2.70346	1.43481	0.0473768	0.247689	Up	26.8986	13.4005	8.98157	35.0513	57.8182	53.8101
23	TraesCS3B02G490600	499.865	269.391	730.339	2.71107	1.43886	0.0201533	0.143982	Up	12.6087	11.2572	18.9908	24.1271	37.2506	70.1687	GST3		GO:0005515	protein binding	ko00982,ko00480,ko00980	Drug metabolism - cytochrome P450|Glutathione metabolism|Metabolism of xenobiotics by cytochrome P450
24	TraesCS4B02G015300	357.881	192.745	523.017	2.71352	1.44016	0.0242553	0.162724	Up	3.81205	7.80046	5.90408	7.67806	23.5511	26.6603	NPC4		GO:0016788,GO:0003824	hydrolase activity, acting on ester bonds|catalytic activity	ko00562,ko02024,ko00565,ko00564	Inositol phosphate metabolism|Quorum sensing|Ether lipid metabolism|Glycerophospholipid metabolism
25	TraesCS1B02G265900	247.096	132.594	361.598	2.72712	1.44738	0.0243208	0.163067	Up	6.75837	4.51571	6.06704	9.25942	18.3872	27.677	GID1	GID1 protein [Source:UniProtKB/TrEMBL;Acc:I7HKW8]	GO:0016787,GO:0010331	hydrolase activity|gibberellin binding	ko04075	Plant hormone signal transduction
26	TraesCS3D02G388500	162.022	86.615	237.429	2.7412	1.45481	0.0338102	0.200417	Up	3.44774	4.03535	4.21208	6.03458	10.4215	12.3399	At3g57810
27	TraesCS3B02G395700	38.7792	20.6981	56.8604	2.74713	1.45793	0.0455157	0.241806	Up	1.83352	0.747665	0.345861	1.21894	2.45231	4.76173	AKR4C10		GO:0016491,GO:0055114	oxidoreductase activity|oxidation-reduction process
28	TraesCS3A02G327200	1256.69	668.962	1844.41	2.75712	1.46316	0.0490832	0.252998	Up	35.319	31.6908	33.0677	85.3602	76.0625	92.4781	GOS2	Putative translation initiation factor [Source:UniProtKB/TrEMBL;Acc:E6Y3A2]	GO:0003743,GO:0006413	translation initiation factor activity|translational initiation	ko03013	RNA transport
29	TraesCS1B02G150000	174.222	92.7407	255.704	2.7572	1.4632	0.049316	0.253651	Up	0.0989984	2.90954	3.66531	4.83159	6.42854	6.25057	At3g08650		GO:0016021,GO:0030001,GO:0016020,GO:0055085,GO:0046873	integral component of membrane|metal ion transport|membrane|transmembrane transport|metal ion transmembrane transporter activity
30	TraesCS2D02G387500	86.1735	45.8145	126.533	2.76184	1.46563	0.0485643	0.251366	Up	2.48509	2.87297	3.68173	4.72254	14.6244	9.75825
31	TraesCS4B02G287300	90.6497	48.1915	133.108	2.76206	1.46575	0.0431401	0.233892	Up	2.03704	1.35987	0.731793	3.18344	3.03751	5.60164	PBL3		GO:0005524,GO:0004672,GO:0004674,GO:0006468	ATP binding|protein kinase activity|protein serine/threonine kinase activity|protein phosphorylation
32	TraesCS3A02G332600	82.0924	43.5703	120.615	2.76827	1.46899	0.0308262	0.189477	Up	3.02469	1.59267	0.642472	1.99821	6.49807	8.82231	UGT87A1	Glycosyltransferase [Source:UniProtKB/TrEMBL;Acc:A0A1D5V9R9]	GO:0016758	transferase activity, transferring hexosyl groups
33	TraesCS6B02G278100	122.289	64.882	179.696	2.76958	1.46967	0.0466098	0.245324	Up	4.60367	2.53713	2.30935	2.9686	7.38781	10.0034	GPX6	Glutathione peroxidase [Source:UniProtKB/TrEMBL;Acc:A0A341WZ35]	GO:0006979,GO:0055114,GO:0004602	response to oxidative stress|oxidation-reduction process|glutathione peroxidase activity	ko00480,ko00590	Glutathione metabolism|Arachidonic acid metabolism
34	TraesCS5B02G411900	79.0123	41.8845	116.14	2.77286	1.47138	0.0376239	0.214749	Up	2.76767	1.38664	2.421	4.86293	7.14303	9.97738
35	TraesCS3D02G315700	164.218	86.9011	241.536	2.77943	1.47479	0.0427643	0.232619	Up	2.39678	1.5996	1.40244	3.25011	4.47669	6.7851	DGK5	Diacylglycerol kinase [Source:UniProtKB/TrEMBL;Acc:W5DDG6]	GO:0007165,GO:0016301,GO:0003951,GO:0004143,GO:0007205,GO:0005524	signal transduction|kinase activity|NAD+ kinase activity|diacylglycerol kinase activity|protein kinase C-activating G protein-coupled receptor signaling pathway|ATP binding	ko00564,ko04072,ko04070,ko00561	Glycerophospholipid metabolism|Phospholipase D signaling pathway|Phosphatidylinositol signaling system|Glycerolipid metabolism
36	TraesCS4A02G070700	119.29	63.0796	175.501	2.78222	1.47624	0.0435662	0.235256	Up	3.90746	4.41854	2.85117	7.69237	18.8449	14.1559
37	TraesCS5D02G191300	195.394	103.313	287.475	2.78256	1.47642	0.0223669	0.15444	Up	2.63388	3.03636	5.89651	6.26602	8.75426	16.9612	SLD2	Delta8-sphingolipid desaturase 2 [Source:UniProtKB/TrEMBL;Acc:W5FYY9]	GO:0016021,GO:0016491,GO:0006629,GO:0016020,GO:0055114	integral component of membrane|oxidoreductase activity|lipid metabolic process|membrane|oxidation-reduction process
38	TraesCS6D02G171800	1029.43	543.001	1515.87	2.79165	1.48112	0.0460958	0.243756	Up	10.1813	9.20719	10.9824	22.6616	28.7259	27.982	Os02g0218200	Aminopeptidase [Source:UniProtKB/TrEMBL;Acc:W5H4V8]	GO:0008270,GO:0004177,GO:0008237,GO:0006508	zinc ion binding|aminopeptidase activity|metallopeptidase activity|proteolysis
39	TraesCS2D02G319800	216.945	113.858	320.032	2.81079	1.49097	0.0477175	0.24883	Up	17.2801	7.23559	9.09309	29.5509	38.9143	35.2863	PLAT2		GO:0005515	protein binding
40	TraesCS3B02G414800	174.179	91.2648	257.093	2.817	1.49416	0.0474066	0.247792	Up	1.38068	1.65315	4.32299	7.11894	7.26366	8.3167	NPF5.10		GO:0016021,GO:0022857,GO:0016020,GO:0055085	integral component of membrane|transmembrane transporter activity|membrane|transmembrane transport
41	TraesCS5B02G371100	53.1655	27.8202	78.5108	2.82208	1.49676	0.0341579	0.201796	Up	0.555055	0.672156	1.12411	1.47317	3.94721	4.86752	DTX16	Protein DETOXIFICATION [Source:UniProtKB/TrEMBL;Acc:A0A341W0X0]	GO:0016020,GO:0055085,GO:0015297,GO:0006855	membrane|transmembrane transport|antiporter activity|drug transmembrane transport
42	TraesCS2B02G142000	58.1101	30.2837	85.9365	2.83772	1.50473	0.0305199	0.188245	Up	2.44553	0.55487	0.529443	1.92745	2.49772	5.82221	NET3A		GO:0003779	actin binding
43	TraesCS1B02G304800	854.516	445.031	1264	2.84025	1.50602	0.0211867	0.148531	Up	54.6357	36.7574	7.69072	72.5193	76.6167	151.534
44	TraesCS3A02G413600	35.0568	18.2388	51.8748	2.8442	1.50802	0.0438043	0.236013	Up	0.63509	0.682067	0.91704	1.57674	2.42809	3.87391	BT2		GO:0005634,GO:0008270,GO:0006355,GO:0004402,GO:0003712,GO:0005515	nucleus|zinc ion binding|regulation of transcription, DNA-templated|histone acetyltransferase activity|transcription coregulator activity|protein binding
45	TraesCS5D02G217200	70.9333	36.8465	105.02	2.85021	1.51107	0.0256439	0.169415	Up	0.730586	1.15796	0.975912	1.04102	4.1692	4.71167	CYP75B2		GO:0020037,GO:0004497,GO:0005506,GO:0016705,GO:0055114	heme binding|monooxygenase activity|iron ion binding|oxidoreductase activity, acting on paired donors, with incorporation or reduction of molecular oxygen|oxidation-reduction process
46	TraesCS4B02G278000	2207.03	1145.63	3268.42	2.85294	1.51245	0.0446618	0.238885	Up	56.4022	47.4559	51.941	147.165	122.785	142.305	ARD2	1,2-dihydroxy-3-keto-5-methylthiopentene dioxygenase [Source:UniProtKB/TrEMBL;Acc:W5E8D7]	GO:0005737,GO:0016491,GO:0005634,GO:0005506,GO:0055114,GO:0019509,GO:0010309,GO:0046872,GO:0008652,GO:0051213,GO:0009086	cytoplasm|oxidoreductase activity|nucleus|iron ion binding|oxidation-reduction process|L-methionine salvage from methylthioadenosine|acireductone dioxygenase [iron(II)-requiring] activity|metal ion binding|cellular amino acid biosynthetic process|dioxygenase activity|methionine biosynthetic process	ko00270	Cysteine and methionine metabolism
47	TraesCS1A02G330900	280.693	145.699	415.687	2.85306	1.51251	0.0365287	0.210675	Up	8.40661	9.79064	8.12004	25.7268	28.5965	31.9663	ITPK4	Inositol-tetrakisphosphate 1-kinase [Source:UniProtKB/TrEMBL;Acc:A0A341NRB4]	GO:0046872,GO:0005524,GO:0005622,GO:0000287,GO:0032957,GO:0047325,GO:0052725,GO:0052726	metal ion binding|ATP binding|intracellular|magnesium ion binding|inositol trisphosphate metabolic process|inositol tetrakisphosphate 1-kinase activity|inositol-1,3,4-trisphosphate 6-kinase activity|inositol-1,3,4-trisphosphate 5-kinase activity	ko00562,ko04070	Inositol phosphate metabolism|Phosphatidylinositol signaling system
48	TraesCS5A02G401200	54.0574	28.0535	80.0614	2.85389	1.51293	0.0258515	0.170295	Up	2.50246	2.25193	0.619431	2.57849	5.54717	10.6435			GO:0003676	nucleic acid binding
49	TraesCS6D02G302400	96.9805	50.0802	143.881	2.87301	1.52256	0.0376626	0.214878	Up	1.73951	1.17428	0.773938	2.16094	4.82146	4.78095	MTP3		GO:0016021,GO:0055085,GO:0008324,GO:0006812	integral component of membrane|transmembrane transport|cation transmembrane transporter activity|cation transport
50	TraesCS5B02G227600	1360.84	702.257	2019.42	2.87562	1.52387	0.0312196	0.190754	Up	18.3707	17.2542	22.9381	51.2376	71.6822	69.975			GO:0008233,GO:0006508	peptidase activity|proteolysis	ko04142	Lysosome
51	TraesCS3D02G290000	186.677	96.1756	277.179	2.88201	1.52707	0.0479211	0.24931	Up	4.42669	4.28571	3.66282	9.06806	14.6542	12.3851			GO:0005525,GO:0003924	GTP binding|GTPase activity	ko04144,ko04145	Endocytosis|Phagosome
52	TraesCS6A02G155500	1048.32	540.047	1556.59	2.88232	1.52723	0.0383611	0.217331	Up	9.78697	9.01622	5.68988	19.5229	21.5231	24.8918	ALDH5F1		GO:0016491,GO:0016620,GO:0055114,GO:0009013,GO:0009450	oxidoreductase activity|oxidoreductase activity, acting on the aldehyde or oxo group of donors, NAD or NADP as acceptor|oxidation-reduction process|succinate-semialdehyde dehydrogenase [NAD(P)+] activity|gamma-aminobutyric acid catabolic process	ko00250,ko00650	Alanine, aspartate and glutamate metabolism|Butanoate metabolism
53	TraesCS2A02G204400	162.605	83.7385	241.471	2.88363	1.52789	0.0266791	0.173535	Up	1.6244	2.24938	2.36676	4.0939	6.0731	8.40997	SPHK1		GO:0016301,GO:0003951	kinase activity|NAD+ kinase activity	ko00600,ko04020,ko04370,ko04071	Sphingolipid metabolism|Calcium signaling pathway|VEGF signaling pathway|Sphingolipid signaling pathway
54	TraesCS5A02G390700	184.552	95.021	274.084	2.88445	1.5283	0.0462548	0.244274	Up	12.4283	7.32037	11.5852	29.0485	29.0043	31.3976	SPAC1782.12c		GO:0016021,GO:0016020	integral component of membrane|membrane
55	TraesCS7D02G417100	98.9802	50.9144	147.046	2.8881	1.53012	0.0394371	0.221318	Up	2.48595	1.37246	1.79972	4.76184	5.68634	6.86873	EDR2
56	TraesCS1D02G254500	525.592	269.832	781.353	2.8957	1.53391	0.0264085	0.172502	Up	8.24879	5.00769	8.83561	14.3271	30.0019	29.5868	GID1	GID1 protein [Source:UniProtKB/TrEMBL;Acc:I7HZD6]	GO:0016787,GO:0010331	hydrolase activity|gibberellin binding	ko04075	Plant hormone signal transduction
57	TraesCS6D02G133500	254.504	130.604	378.404	2.89733	1.53472	0.0346201	0.203581	Up	5.32317	3.79378	2.27162	7.81048	14.3171	13.3185	CYP71D55		GO:0020037,GO:0004497,GO:0005506,GO:0016705,GO:0055114	heme binding|monooxygenase activity|iron ion binding|oxidoreductase activity, acting on paired donors, with incorporation or reduction of molecular oxygen|oxidation-reduction process
58	TraesCS5D02G503800	550.708	282.171	819.244	2.90336	1.53772	0.0300609	0.186448	Up	8.65446	6.81232	3.65266	11.3682	23.8155	22.7517	ASA1		GO:0009058,GO:0000162,GO:0004049	biosynthetic process|tryptophan biosynthetic process|anthranilate synthase activity	ko01230,ko02024,ko00400	Biosynthesis of amino acids|Quorum sensing|Phenylalanine, tyrosine and tryptophan biosynthesis
59	TraesCS5A02G168200	309.136	158.199	460.072	2.90819	1.54012	0.0214508	0.149845	Up	6.29485	7.96075	8.9314	14.2731	34.7129	34.8912	NSP2		GO:0005634,GO:0005829,GO:0010043,GO:0005515	nucleus|cytosol|response to zinc ion|protein binding
60	TraesCS3B02G253600	37.7229	19.2866	56.1592	2.91182	1.54192	0.0390746	0.219865	Up	0.454081	0.543271	0.996459	1.07987	1.8575	3.73989	At5g41800
61	TraesCS4B02G244400	207.277	105.974	308.579	2.91185	1.54193	0.0331439	0.198188	Up	1.45754	1.86857	3.75191	6.30939	7.32186	8.80742	DTX42	Protein DETOXIFICATION [Source:UniProtKB/TrEMBL;Acc:W5E135]	GO:0016021,GO:0016020,GO:0055085,GO:0015238,GO:0015297,GO:0006855,GO:0042910,GO:0042908,GO:0005381,GO:0015137,GO:0046873,GO:0006879,GO:0009737,GO:0016036,GO:0030001,GO:0055072,GO:0005886	integral component of membrane|membrane|transmembrane transport|GO_0015238|antiporter activity|drug transmembrane transport|xenobiotic transmembrane transporter activity|xenobiotic transport|iron ion transmembrane transporter activity|citrate transmembrane transporter activity|metal ion transmembrane transporter activity|cellular iron ion homeostasis|response to abscisic acid|cellular response to…
62	TraesCS1A02G421200	118.055	60.3503	175.76	2.91233	1.54218	0.0281741	0.179398	Up	3.61158	2.87356	0.589944	7.92206	3.32196	11.6676	SCPL50	Carboxypeptidase [Source:UniProtKB/TrEMBL;Acc:A0A1D5S077]	GO:0004185,GO:0006508	serine-type carboxypeptidase activity|proteolysis
63	TraesCS7D02G303500	199.639	102.016	297.262	2.91387	1.54293	0.0291732	0.183109	Up	2.28731	1.97493	2.51937	4.48698	5.51009	8.1465	NDB2		GO:0016491,GO:0005509,GO:0055114	oxidoreductase activity|calcium ion binding|oxidation-reduction process
64	TraesCS3D02G213200	928.481	473.993	1382.97	2.9177	1.54483	0.0495535	0.254306	Up	16.5012	14.9577	17.132	44.5554	49.7201	37.8178	Os01g0587000	V-type proton ATPase subunit [Source:UniProtKB/TrEMBL;Acc:B2BA42]	GO:0015991,GO:0015078,GO:0033179,GO:0006811,GO:1902600	GO_0015991|proton transmembrane transporter activity|proton-transporting V-type ATPase, V0 domain|ion transport|proton transmembrane transport	ko04145,ko00190,ko04142	Phagosome|Oxidative phosphorylation|Lysosome
65	TraesCS5D02G314100	436.388	222.57	650.206	2.92136	1.54664	0.0140916	0.113653	Up	9.26026	4.93937	9.36627	13.6726	24.7392	50.024	SCPL18		GO:0004185,GO:0006508	serine-type carboxypeptidase activity|proteolysis
66	TraesCS6D02G199200	295.587	150.708	440.465	2.92264	1.54727	0.0471533	0.246968	Up	14.4732	8.31858	6.42302	32.3735	37.2066	30.0443	BBX25		GO:0008270,GO:0005622	zinc ion binding|intracellular
67	TraesCS1D02G151500	926.912	471.663	1382.16	2.93039	1.5511	0.0328244	0.196923	Up	7.25127	11.2357	11.7267	20.5224	53.9431	32.7083	FAO1	Long-chain-alcohol oxidase [Source:UniProtKB/TrEMBL;Acc:A0A1D5SX67]	GO:0016020,GO:0055114,GO:0050660,GO:0016614,GO:0046577	membrane|oxidation-reduction process|flavin adenine dinucleotide binding|oxidoreductase activity, acting on CH-OH group of donors|long-chain-alcohol oxidase activity
68	TraesCS5B02G549500	57.1816	29.0931	85.2702	2.93094	1.55136	0.0464041	0.244708	Up	0.627704	0.575638	1.05728	2.06529	2.82589	2.80041	At4g15970
69	TraesCS1B02G175600	70.4797	35.8419	105.117	2.93281	1.55228	0.0406728	0.225384	Up	0.552598	0.701579	0.572043	1.69044	2.29368	2.58317			GO:0009055,GO:0015035,GO:0045454,GO:0005622,GO:0035556	electron transfer activity|protein disulfide oxidoreductase activity|cell redox homeostasis|intracellular|intracellular signal transduction
70	TraesCS3B02G356600	1205.67	612.984	1798.35	2.93377	1.55275	0.0429409	0.233263	Up	26.0921	34.5933	36.6635	87.2088	94.1355	82.2579	GOS2	Putative translation initiation factor [Source:UniProtKB/TrEMBL;Acc:E6Y3A2]	GO:0003743,GO:0006413	translation initiation factor activity|translational initiation	ko03013	RNA transport
71	TraesCS4A02G127400	162.554	82.6203	242.487	2.93496	1.55334	0.0328236	0.196923	Up	3.99564	3.8896	3.82098	10.9031	10.381	14.5878	V2		GO:0004385,GO:0048638,GO:0006163	guanylate kinase activity|regulation of developmental growth|purine nucleotide metabolic process	ko00230	Purine metabolism
72	TraesCS6A02G248000	648.766	329.704	967.827	2.93544	1.55358	0.0404998	0.224971	Up	12.6218	6.83744	7.03699	24.0373	31.8668	26.1872	SAM3	S-adenosylmethionine synthase [Source:UniProtKB/TrEMBL;Acc:A0A1D6B308]	GO:0046872,GO:0005524,GO:0006556,GO:0006730,GO:0004478,GO:0000166,GO:0016740	metal ion binding|ATP binding|S-adenosylmethionine biosynthetic process|one-carbon metabolic process|methionine adenosyltransferase activity|nucleotide binding|transferase activity	ko01230,ko00270	Biosynthesis of amino acids|Cysteine and methionine metabolism
73	TraesCS3D02G430300	128.649	65.3317	191.967	2.93834	1.555	0.0359041	0.208307	Up	4.53404	3.01828	3.80658	10.9632	14.2173	15.367	DCI1		GO:0003824	catalytic activity	ko04146	Peroxisome
74	TraesCS3D02G381800	160.175	81.2514	239.1	2.94271	1.55715	0.0479583	0.249406	Up	4.53857	4.32885	2.44821	14.1056	11.6301	11.6031	LIGB		GO:0016491,GO:0008270,GO:0055114,GO:0006725,GO:0008198,GO:0016701	oxidoreductase activity|zinc ion binding|oxidation-reduction process|cellular aromatic compound metabolic process|ferrous iron binding|oxidoreductase activity, acting on single donors with incorporation of molecular oxygen	ko00965	Betalain biosynthesis
75	TraesCS6D02G198700	301.674	152.982	450.366	2.94393	1.55774	0.045232	0.240842	Up	7.70639	6.14953	6.73837	17.7648	24.6946	17.8981	NIC1		GO:0003824,GO:0009737,GO:0019365,GO:0008936	catalytic activity|response to abscisic acid|pyridine nucleotide salvage|nicotinamidase activity
76	TraesCS3A02G331000	70.5135	35.7559	105.271	2.94416	1.55786	0.0335446	0.199376	Up	1.46243	0.51798	1.84782	2.06932	4.9557	5.37575	ISPE		GO:0005524,GO:0016114,GO:0050515	ATP binding|terpenoid biosynthetic process|4-(cytidine 5'-diphospho)-2-C-methyl-D-erythritol kinase activity	ko00900	Terpenoid backbone biosynthesis
77	TraesCS3D02G084600	1465.6	742.942	2188.25	2.94538	1.55845	0.0344044	0.202624	Up	20.211	24.0305	17.8439	38.2611	117.133	62.1652	CYP704C1		GO:0020037,GO:0005506,GO:0016705,GO:0055114	heme binding|iron ion binding|oxidoreductase activity, acting on paired donors, with incorporation or reduction of molecular oxygen|oxidation-reduction process
78	TraesCS4D02G112900	37.1638	18.8368	55.4909	2.94588	1.5587	0.0432736	0.23426	Up	0.58279	0.239675	0.237283	0.504539	1.04017	1.61793	EXO70A1	Exocyst subunit Exo70 family protein [Source:UniProtKB/TrEMBL;Acc:W5EP63]	GO:0015031,GO:0000145,GO:0006887	protein transport|exocyst|exocytosis
79	TraesCS2D02G366100	260.829	132.183	389.474	2.94648	1.55899	0.0291251	0.182967	Up	7.65504	5.73736	6.84077	16.9128	23.8624	26.0604	Os04g0533500		GO:0016021,GO:0055114,GO:0016020	integral component of membrane|oxidation-reduction process|membrane
80	TraesCS7B02G300200	381.648	193.358	569.939	2.94759	1.55954	0.0164555	0.126089	Up	3.4902	6.94541	7.26621	7.49787	28.1482	28.1064	At5g44410		GO:0016491,GO:0071949,GO:0055114,GO:0050660	oxidoreductase activity|FAD binding|oxidation-reduction process|flavin adenine dinucleotide binding
81	TraesCS7A02G518300	603.679	305.779	901.58	2.94847	1.55997	0.0492441	0.253428	Up	12.2857	11.5714	10.1172	37.1501	44.9211	29.5903	ADIPOR1		GO:0016021,GO:0009725,GO:0009651,GO:0009744,GO:0009788	integral component of membrane|response to hormone|response to salt stress|response to sucrose|negative regulation of abscisic acid-activated signaling pathway	ko04152	AMPK signaling pathway
82	TraesCS5B02G190300	383.072	193.928	572.216	2.95066	1.56104	0.0491236	0.253133	Up	4.91496	3.80789	3.97214	10.9784	15.8059	10.4476			GO:0016021	integral component of membrane
83	TraesCS2A02G355400	25131	12711.6	37550.4	2.95403	1.56268	0.0369782	0.212426	Up	517.09	411.063	421.981	1372.64	1407.12	1449.47	SAMDC		GO:0008295,GO:0004014,GO:0006597,GO:0016829,GO:0016831,GO:0006596,GO:0006557	spermidine biosynthetic process|adenosylmethionine decarboxylase activity|spermine biosynthetic process|lyase activity|carboxy-lyase activity|polyamine biosynthetic process|S-adenosylmethioninamine biosynthetic process	ko00330,ko00270	Arginine and proline metabolism|Cysteine and methionine metabolism
84	TraesCS7A02G416200	206.882	104.643	309.122	2.95407	1.5627	0.0467137	0.245629	Up	3.19179	2.9776	3.56514	8.81351	9.08817	8.54107	APEM9		GO:0016021,GO:0005622,GO:0015919	integral component of membrane|intracellular|peroxisomal membrane transport
85	TraesCS2D02G543900	52.872	26.7162	79.0278	2.95805	1.56465	0.0490092	0.252771	Up	2.02179	0.928642	1.19773	4.88339	3.21884	5.51437	ERF3	Salinity inducible transcription factor ERF4 [Source:UniProtKB/TrEMBL;Acc:I6U4A5]	GO:0003700,GO:0006351,GO:0005634,GO:0003677,GO:0006355	DNA-binding transcription factor activity|transcription, DNA-templated|nucleus|DNA binding|regulation of transcription, DNA-templated
86	TraesCS3B02G331100	5867.45	2964.1	8770.79	2.959	1.56511	0.046087	0.243741	Up	50.8721	57.8988	115.923	192.03	264.805	171.93	Os01g0760600	Aspartate aminotransferase [Source:UniProtKB/TrEMBL;Acc:A0A077S3V2]	GO:0030170,GO:0003824,GO:0006520,GO:0009058,GO:0008483,GO:0004069,GO:0016740	pyridoxal phosphate binding|catalytic activity|cellular amino acid metabolic process|biosynthetic process|transaminase activity|L-aspartate:2-oxoglutarate aminotransferase activity|transferase activity	ko00710,ko00400,ko00950,ko00350,ko01200,ko00330,ko01210,ko01230,ko00250,ko00220,ko00960,ko00270,ko00360	Carbon fixation in photosynthetic organisms|Phenylalanine, tyrosine and tryptophan biosynthesis|Isoquinoline alkaloid biosynthesis|Tyrosine metabolism|Carbon metabolism|Arginine and proline metabolism|2-Oxocarboxylic acid metabolism|Biosynthesis of amino acids|Alanine, aspartate and glutamate metabolism|Arginine biosynthesis|Tropane, piperidine and pyridine alkaloid biosynthesis|Cysteine and meth…
87	TraesCS4A02G092000	510.647	257.957	763.338	2.95917	1.56519	0.0249837	0.166301	Up	8.08419	11.4072	6.24047	13.3118	40.2196	30.8794
88	TraesCS7B02G052600	169.712	85.718	253.707	2.95978	1.56549	0.0436885	0.235678	Up	4.41462	4.28783	2.67052	11.3536	13.6717	11.2616	CCR1		GO:0003824,GO:0050662	catalytic activity|coenzyme binding	ko00940	Phenylpropanoid biosynthesis
89	TraesCS1A02G257200	263.832	133.208	394.455	2.9612	1.56618	0.044157	0.237135	Up	4.20598	3.88179	2.48998	6.5896	19.5593	8.9973	AATP1		GO:0016021,GO:0005524	integral component of membrane|ATP binding
90	TraesCS6B02G328700	950.256	479.561	1420.95	2.96302	1.56707	0.0267654	0.173673	Up	13.2647	10.4053	12.2661	13.0921	59.2669	42.6013	PYD1		GO:0005737,GO:0003824,GO:0055114,GO:0016627	cytoplasm|catalytic activity|oxidation-reduction process|oxidoreductase activity, acting on the CH-CH group of donors	ko00770,ko00240,ko00983,ko00410	Pantothenate and CoA biosynthesis|Pyrimidine metabolism|Drug metabolism - other enzymes|beta-Alanine metabolism
91	TraesCS5D02G168100	160.972	81.2106	240.733	2.96431	1.5677	0.049904	0.255438	Up	2.23813	1.30279	1.75612	4.65708	6.34725	5.01806	CRCK3		GO:0005524,GO:0004672,GO:0006468	ATP binding|protein kinase activity|protein phosphorylation
92	TraesCS1B02G236000	235.855	118.989	352.721	2.96432	1.5677	0.0422798	0.231082	Up	3.71412	4.09484	2.20359	9.02096	13.9202	9.97755	At3g56050		GO:0016021,GO:0005524,GO:0004672,GO:0006468	integral component of membrane|ATP binding|protein kinase activity|protein phosphorylation
93	TraesCS2A02G277900	401.296	202.178	600.414	2.96973	1.57033	0.0349246	0.20468	Up	10.2849	7.26326	9.1113	25.6041	24.7407	29.3369	CEQORH		GO:0016491,GO:0055114	oxidoreductase activity|oxidation-reduction process
94	TraesCS1A02G198800	116.153	58.5087	173.797	2.97045	1.57068	0.0398499	0.222761	Up	4.69694	5.17916	3.51188	11.958	14.671	14.6626	Os05g0344400	CASP-like protein [Source:UniProtKB/TrEMBL;Acc:W4ZM68]	GO:0016021,GO:0005886	integral component of membrane|plasma membrane
95	TraesCS7D02G429000	1368.87	689.266	2048.47	2.97195	1.57141	0.0270011	0.174509	Up	26.3088	57.6147	102.126	181.941	183.392	214.74	ATX1		GO:0046872,GO:0030001,GO:0019904,GO:0048046,GO:0009507,GO:0006878,GO:0009651,GO:0046686	metal ion binding|metal ion transport|protein domain specific binding|apoplast|chloroplast|cellular copper ion homeostasis|response to salt stress|response to cadmium ion
96	TraesCS3A02G210400	793.461	398.855	1188.07	2.97869	1.57468	0.0487377	0.251776	Up	14.8559	13.3381	15.5946	41.881	45.7116	33.2703	Os01g0587000	V-type proton ATPase subunit [Source:UniProtKB/TrEMBL;Acc:A0A341RZ73]	GO:0015078,GO:0033179	proton transmembrane transporter activity|proton-transporting V-type ATPase, V0 domain	ko04145,ko00190,ko04142	Phagosome|Oxidative phosphorylation|Lysosome
97	TraesCS2B02G049200	178.943	89.8718	268.014	2.98218	1.57637	0.0315181	0.191817	Up	1.57422	3.54432	5.18602	10.344	6.7871	12.763	AAT1		GO:0016747,GO:0003824	transferase activity, transferring acyl groups other than amino-acyl groups|catalytic activity	ko00900,ko01200,ko00071,ko00380,ko00310,ko00072,ko00620,ko00630,ko00720,ko00280,ko02020,ko01212,ko00650,ko00640,ko00362	Terpenoid backbone biosynthesis|Carbon metabolism|Fatty acid degradation|Tryptophan metabolism|Lysine degradation|Synthesis and degradation of ketone bodies|Pyruvate metabolism|Glyoxylate and dicarboxylate metabolism|Carbon fixation pathways in prokaryotes|Valine, leucine and isoleucine degradation|Two-component system|Fatty acid metabolism|Butanoate metabolism|Propanoate metabolism|Benzoate degr…
98	TraesCS1D02G426000	393.352	197.447	589.258	2.98439	1.57744	0.0368965	0.212048	Up	5.15763	4.02305	5.49293	12.622	14.9909	15.4772	At1g19450		GO:0016021,GO:0022857,GO:0016020,GO:0055085,GO:0005215	integral component of membrane|transmembrane transporter activity|membrane|transmembrane transport|transporter activity
99	TraesCS5A02G164400	320.923	161.025	480.822	2.98602	1.57822	0.0399023	0.22283	Up	8.98732	6.28813	8.39641	20.1207	24.536	21.6668			GO:0016491,GO:0005777,GO:0080026,GO:0080024,GO:0048767	oxidoreductase activity|peroxisome|response to indolebutyric acid|indolebutyric acid metabolic process|root hair elongation	ko00830,ko04146	Retinol metabolism|Peroxisome
100	TraesCS7D02G116300	270.34	135.539	405.142	2.98911	1.57972	0.0396247	0.222024	Up	1.55308	0.836187	1.93719	2.71165	5.51006	3.43704	ABCC10		GO:0016021,GO:0005524,GO:0042626,GO:0055085,GO:0016887	integral component of membrane|ATP binding|ATPase-coupled transmembrane transporter activity|transmembrane transport|ATPase activity
101	TraesCS3D02G142300	992.452	497.342	1487.56	2.99103	1.58064	0.0492664	0.253526	Up	16.2848	15.5825	14.8743	66.9297	64.81	45.0034	CSE		GO:0016021,GO:0005783,GO:0005794	integral component of membrane|endoplasmic reticulum|Golgi apparatus
102	TraesCS5D02G153500	528.113	264.56	791.666	2.99239	1.5813	0.0282053	0.179554	Up	8.78604	8.04085	18.1328	27.2295	58.9592	41.1598	AMC9		GO:0008234,GO:0048046	cysteine-type peptidase activity|apoplast
103	TraesCS4A02G206900	846.707	424.045	1269.37	2.99347	1.58182	0.0481435	0.249948	Up	31.9089	28.3807	31.4302	110.857	116.659	77.5971	VATP-P1	V-type proton ATPase proteolipid subunit [Source:UniProtKB/TrEMBL;Acc:B2BA43]	GO:0016021,GO:0015991,GO:0015078,GO:0005774,GO:0033179,GO:0016020,GO:0006811,GO:0033177,GO:1902600,GO:0005773	integral component of membrane|GO_0015991|proton transmembrane transporter activity|vacuolar membrane|proton-transporting V-type ATPase, V0 domain|membrane|ion transport|proton-transporting two-sector ATPase complex, proton-transporting domain|proton transmembrane transport|vacuole	ko04145,ko00190,ko04142	Phagosome|Oxidative phosphorylation|Lysosome
104	TraesCS7B02G177400	160.139	80.1839	240.093	2.99428	1.58221	0.0357938	0.207903	Up	6.47597	4.74772	6.17999	20.7213	15.0908	22.7058
105	TraesCS2D02G231600	60.9436	30.4802	91.4069	2.99889	1.58443	0.0483487	0.250688	Up	0.681231	0.328185	0.542833	0.941823	1.967	1.58634	PBF		GO:0005634,GO:0003677,GO:0006355	nucleus|DNA binding|regulation of transcription, DNA-templated
106	TraesCS1B02G228800	83.1268	41.516	124.738	3.00457	1.58716	0.0332432	0.198426	Up	2.13824	2.4035	1.87762	3.99933	10.6151	8.79546
107	TraesCS5B02G428000	1484.6	741.1	2228.1	3.00648	1.58808	0.0417584	0.229289	Up	21.2844	14.6225	17.3412	57.7851	54.3311	47.5864			GO:0046872,GO:0005524,GO:0006457,GO:0009408,GO:0031072,GO:0051082	metal ion binding|ATP binding|protein folding|response to heat|heat shock protein binding|unfolded protein binding	ko04141	Protein processing in endoplasmic reticulum
108	TraesCS4D02G221100	361.029	180.193	541.865	3.00713	1.58839	0.0476283	0.248607	Up	3.70806	4.86494	8.04365	17.8247	14.9167	12.513	CS2	Chorismate synthase [Source:UniProtKB/TrEMBL;Acc:W5EKD5]	GO:0005730,GO:0009073,GO:0004107,GO:0009423,GO:0009570	nucleolus|aromatic amino acid family biosynthetic process|chorismate synthase activity|chorismate biosynthetic process|chloroplast stroma	ko01230,ko00400	Biosynthesis of amino acids|Phenylalanine, tyrosine and tryptophan biosynthesis
109	TraesCS2B02G362700	377.695	188.413	566.977	3.00923	1.5894	0.0401233	0.223598	Up	6.10992	4.62616	4.80422	12.9843	16.4716	13.908	G6PDH	Glucose-6-phosphate 1-dehydrogenase [Source:UniProtKB/TrEMBL;Acc:A0A341QQM7]	GO:0055114,GO:0050661,GO:0006006,GO:0004345,GO:0016491,GO:0005975,GO:0016614,GO:0006098	oxidation-reduction process|NADP binding|glucose metabolic process|glucose-6-phosphate dehydrogenase activity|oxidoreductase activity|carbohydrate metabolic process|oxidoreductase activity, acting on CH-OH group of donors|pentose-phosphate shunt	ko01200,ko00480,ko00030	Carbon metabolism|Glutathione metabolism|Pentose phosphate pathway
110	TraesCS7B02G042100	294.157	146.737	441.577	3.0093	1.58943	0.0385411	0.218073	Up	4.82077	2.93245	5.32584	9.51825	17.6226	12.1218	SRG1		GO:0016491,GO:0055114,GO:0046872	oxidoreductase activity|oxidation-reduction process|metal ion binding
111	TraesCS3A02G279800	67.9613	33.9011	102.021	3.00938	1.58947	0.0309546	0.189886	Up	0	2.09739	1.7832	3.32687	4.41278	5.2008	RhGT1	Glycosyltransferase [Source:UniProtKB/TrEMBL;Acc:A0A1D5VF33]	GO:0016758	transferase activity, transferring hexosyl groups
112	TraesCS4B02G133700	243.801	121.576	366.026	3.01068	1.59009	0.0494826	0.2541	Up	1.82048	2.0741	2.08706	3.8974	5.97288	4.25919	LACS6		GO:0003824	catalytic activity	ko00071,ko00061,ko04146,ko02024,ko01212	Fatty acid degradation|Fatty acid biosynthesis|Peroxisome|Quorum sensing|Fatty acid metabolism
113	TraesCS3A02G416400	50.8389	25.3501	76.3276	3.01094	1.59022	0.042268	0.231081	Up	0.920836	1.98452	1.26875	4.64658	3.99624	6.21842
114	TraesCS6D02G033100	39.8967	19.8254	59.968	3.0248	1.59684	0.0406608	0.225355	Up	1.49166	2.54621	2.61764	4.77226	12.6307	7.13097	Os02g0532500		GO:0005576,GO:0030145,GO:0045735	extracellular region|manganese ion binding|nutrient reservoir activity
115	TraesCS6A02G143100	85.0455	42.2451	127.846	3.02629	1.59755	0.0481495	0.249962	Up	1.46606	1.2499	1.6345	2.77043	4.86999	4.47167
116	TraesCS1A02G333700	257.888	128.088	387.688	3.02674	1.59776	0.0473396	0.247587	Up	4.56821	3.48419	4.54927	11.0458	14.2937	10.184	PIP	Proline iminopeptidase [Source:UniProtKB/TrEMBL;Acc:A0A1D5RTN9]	GO:0005737,GO:0008233,GO:0004177,GO:0006508	cytoplasm|peptidase activity|aminopeptidase activity|proteolysis	ko00330	Arginine and proline metabolism
117	TraesCS2A02G548200	845.004	418.894	1271.11	3.03445	1.60144	0.0462798	0.244326	Up	7.03764	10.204	15.4644	37.4482	38.649	25.3704	PAO4		GO:0016491,GO:0055114	oxidoreductase activity|oxidation-reduction process	ko00330,ko00410	Arginine and proline metabolism|beta-Alanine metabolism
118	TraesCS5D02G271100	376.992	186.85	567.135	3.03524	1.60181	0.0380465	0.216329	Up	16.4918	9.82578	9.09508	31.9885	45.1626	34.4083	SAP1		GO:0003677,GO:0008270	DNA binding|zinc ion binding
119	TraesCS6A02G269000	43.971	21.7801	66.1618	3.03771	1.60299	0.0327626	0.196701	Up	1.16965	0.792701	0.383289	1.78082	2.32347	3.82165	PHL11		GO:0005634,GO:0003677	nucleus|DNA binding
120	TraesCS5B02G456700	401.662	198.846	604.478	3.03993	1.60404	0.0333772	0.198915	Up	33.6459	25.0513	34.3456	63.0966	155.367	88.3193
121	TraesCS5A02G194900	503.408	249.176	757.64	3.04058	1.60435	0.0330172	0.197582	Up	4.86262	4.37622	4.50322	11.8764	14.1121	14.5762			GO:0016021	integral component of membrane
122	TraesCS3A02G416300	1881.51	930.784	2832.24	3.04285	1.60542	0.0360048	0.208614	Up	22.3565	26.723	24.9455	86.9772	100.577	74.0356
123	TraesCS2B02G436300	130.681	64.6471	196.714	3.0429	1.60545	0.0460048	0.243445	Up	5.08491	2.15317	3.26958	11.3274	14.2563	10.5323	ERF1A		GO:0003700,GO:0006351,GO:0005634,GO:0003677,GO:0006355	DNA-binding transcription factor activity|transcription, DNA-templated|nucleus|DNA binding|regulation of transcription, DNA-templated
124	TraesCS5D02G282200	44.4967	21.9867	67.0066	3.04759	1.60767	0.046583	0.245247	Up	0.782587	0.674077	0.571091	1.92035	1.49572	2.70323	At3g20240		GO:0016021,GO:0022857,GO:0055085	integral component of membrane|transmembrane transporter activity|transmembrane transport
125	TraesCS2A02G460400	378.171	186.427	569.915	3.05704	1.61214	0.0490644	0.252958	Up	6.13694	4.74661	5.19818	16.3944	17.1282	11.7511	UEL-2		GO:0006012,GO:0003978	galactose metabolic process|UDP-glucose 4-epimerase activity	ko00520	Amino sugar and nucleotide sugar metabolism
126	TraesCS6B02G153900	975.102	480.005	1470.2	3.06289	1.61489	0.0449583	0.239926	Up	7.9857	7.84549	9.45662	21.8063	31.4374	17.4376	MFP		GO:0016491,GO:0055114,GO:0006631,GO:0003857,GO:0003824,GO:0005777,GO:0006635	oxidoreductase activity|oxidation-reduction process|fatty acid metabolic process|3-hydroxyacyl-CoA dehydrogenase activity|catalytic activity|peroxisome|fatty acid beta-oxidation	ko01212,ko00592,ko00071	Fatty acid metabolism|alpha-Linolenic acid metabolism|Fatty acid degradation
127	TraesCS3D02G284800	29.1421	14.3359	43.9482	3.06559	1.61617	0.0399018	0.22283	Up	0.543931	1.11249	1.60296	2.27362	4.74397	5.50193
128	TraesCS1D02G270500	289.653	142.458	436.848	3.0665	1.61659	0.0478852	0.249243	Up	4.21188	3.99471	4.49101	13.2711	11.4194	9.72319			GO:0030170,GO:0003824,GO:0009793,GO:0009058,GO:0033854,GO:0033853,GO:0009095,GO:0004069,GO:0009570	pyridoxal phosphate binding|catalytic activity|embryo development ending in seed dormancy|biosynthetic process|glutamate-prephenate aminotransferase activity|aspartate-prephenate aminotransferase activity|aromatic amino acid family biosynthetic process, prephenate pathway|L-aspartate:2-oxoglutarate aminotransferase activity|chloroplast stroma	ko00400,ko00950,ko00350,ko01230,ko00960,ko00360	Phenylalanine, tyrosine and tryptophan biosynthesis|Isoquinoline alkaloid biosynthesis|Tyrosine metabolism|Biosynthesis of amino acids|Tropane, piperidine and pyridine alkaloid biosynthesis|Phenylalanine metabolism
129	TraesCS1B02G339000	680.725	334.792	1026.66	3.06656	1.61662	0.0401813	0.223812	Up	28.7084	17.0025	28.7374	68.7084	84.7545	60.5398		Thioredoxin [Source:UniProtKB/TrEMBL;Acc:W5A566]	GO:0015035,GO:0045454,GO:0006662,GO:0005623	protein disulfide oxidoreductase activity|cell redox homeostasis|glycerol ether metabolic process|cell
130	TraesCS3A02G285900	2530.63	1243.69	3817.58	3.06956	1.61803	0.0297053	0.185261	Up	24.6386	15.2606	19.3511	42.695	73.0133	60.1572			GO:0051287,GO:0004471,GO:0055114,GO:0004470	NAD binding|malate dehydrogenase (decarboxylating) (NAD+) activity|oxidation-reduction process|malic enzyme activity	ko00710,ko01200,ko00620	Carbon fixation in photosynthetic organisms|Carbon metabolism|Pyruvate metabolism
131	TraesCS3A02G054200	111.837	54.9375	168.737	3.07144	1.61892	0.0371841	0.213119	Up	1.11875	1.03466	0.974824	2.75795	2.6126	3.36679	SPBC115.02c		GO:0005524	ATP binding
132	TraesCS7A02G409900	205.182	100.724	309.641	3.07415	1.62019	0.043647	0.235533	Up	2.92418	2.95796	2.86801	8.24197	11.1462	7.61104	At4g19185	WAT1-related protein [Source:UniProtKB/TrEMBL;Acc:A0A1D6SBS6]	GO:0016021,GO:0022857,GO:0016020	integral component of membrane|transmembrane transporter activity|membrane
133	TraesCS1A02G204200	289.99	142.356	437.625	3.07416	1.62019	0.0327197	0.196561	Up	5.9865	3.85984	3.11909	9.50483	15.7977	13.4933	iqw1		GO:0005515	protein binding
134	TraesCS5B02G517200	86.6557	42.5146	130.797	3.07652	1.6213	0.0429163	0.233208	Up	1.66302	1.39234	1.83226	4.211	7.21744	5.40368	ILL4		GO:0016787	hydrolase activity
135	TraesCS6D02G401200	159.162	78.0584	240.266	3.07803	1.62201	0.0363155	0.209868	Up	4.06852	2.22164	2.13576	5.6219	14.3714	9.44642			GO:0009507	chloroplast
136	TraesCS7B02G169800	595.819	291.952	899.687	3.08162	1.62369	0.0445297	0.238481	Up	16.1476	9.77923	16.4071	43.4357	41.7918	31.9883	APX4		GO:0016021,GO:0004601,GO:0020037,GO:0006979,GO:0055114,GO:0016020,GO:0098869	integral component of membrane|peroxidase activity|heme binding|response to oxidative stress|oxidation-reduction process|membrane|cellular oxidant detoxification	ko00480,ko00053	Glutathione metabolism|Ascorbate and aldarate metabolism
137	TraesCS3A02G391400	455.756	223.19	688.323	3.08403	1.62482	0.0279788	0.17868	Up	14.5782	6.53136	5.04807	13.0532	45.7903	28.1197	AIRP2
138	TraesCS1D02G351500	230.149	112.668	347.629	3.08541	1.62546	0.0382249	0.216928	Up	4.99299	4.27119	4.35983	13.1952	13.2735	12.3375	At3g47520		GO:0005975,GO:0016491,GO:0003824,GO:0055114,GO:0006099,GO:0016616,GO:0030060	carbohydrate metabolic process|oxidoreductase activity|catalytic activity|oxidation-reduction process|tricarboxylic acid cycle|oxidoreductase activity, acting on the CH-OH group of donors, NAD or NADP as acceptor|L-malate dehydrogenase activity	ko00710,ko01200,ko00630,ko00620,ko00020,ko00270	Carbon fixation in photosynthetic organisms|Carbon metabolism|Glyoxylate and dicarboxylate metabolism|Pyruvate metabolism|Citrate cycle (TCA cycle)|Cysteine and methionine metabolism
139	TraesCS5A02G512400	410.612	200.961	620.262	3.08647	1.62596	0.0459468	0.243289	Up	5.8836	5.15151	3.6275	16.0766	15.9389	11.6486
140	TraesCS7A02G438100	144.319	70.6058	218.033	3.08804	1.62669	0.0190942	0.13897	Up	5.74802	3.31549	4.26634	4.57349	14.7161	24.7145	DMP2
141	TraesCS2B02G048700	644.342	315.196	973.488	3.08852	1.62691	0.0302957	0.187309	Up	15.171	9.92703	11.359	31.2811	46.3613	40.456	B0616E02-H0507E05.7		GO:0046872,GO:0006527,GO:0009507,GO:0050897,GO:0004053,GO:0033389,GO:0008783,GO:0042742,GO:0016813,GO:0016787	metal ion binding|arginine catabolic process|chloroplast|cobalt ion binding|arginase activity|putrescine biosynthetic process from arginine, using agmatinase|agmatinase activity|defense response to bacterium|hydrolase activity, acting on carbon-nitrogen (but not peptide) bonds, in linear amidines|hydrolase activity	ko01230,ko00330,ko00220	Biosynthesis of amino acids|Arginine and proline metabolism|Arginine biosynthesis
142	TraesCS3A02G139000	111.279	54.4329	168.126	3.08868	1.62699	0.0403549	0.224504	Up	2.02978	2.33533	1.87607	5.76801	8.23868	6.24304	BZR2		GO:0003700,GO:0006351,GO:0009742	DNA-binding transcription factor activity|transcription, DNA-templated|brassinosteroid mediated signaling pathway
143	TraesCS1A02G090600	317.978	155.538	480.418	3.08876	1.62703	0.0478818	0.249243	Up	6.50694	3.73163	5.22967	15.5939	15.3957	11.8749	SPAC644.09	Pyridoxal phosphate homeostasis protein [Source:UniProtKB/TrEMBL;Acc:A0A1D5S534]	GO:0030170	pyridoxal phosphate binding
144	TraesCS5B02G427600	37.5276	18.3542	56.7009	3.08926	1.62726	0.0497094	0.254811	Up	0.858871	0.656298	0.929254	2.95377	2.25493	3.31719	SYP121		GO:0016021,GO:0006886,GO:0016020,GO:0005622,GO:0016192,GO:0005484	integral component of membrane|intracellular protein transport|membrane|intracellular|vesicle-mediated transport|SNAP receptor activity	ko04130	SNARE interactions in vesicular transport
145	TraesCS3B02G240000	291.407	142.443	440.371	3.09156	1.62833	0.0458758	0.243029	Up	4.44831	2.71055	3.00616	11.317	11.014	9.24351	PP2C06		GO:0046872,GO:0003824,GO:0004722,GO:0043169,GO:0016787,GO:0004721,GO:0006470	metal ion binding|catalytic activity|protein serine/threonine phosphatase activity|cation binding|hydrolase activity|phosphoprotein phosphatase activity|protein dephosphorylation	ko04075	Plant hormone signal transduction
146	TraesCS7D02G226900	254.461	124.365	384.558	3.09219	1.62863	0.0493234	0.253673	Up	13.1381	10.0839	9.96681	48.2045	36.5505	30.2802	Os06g0320000
147	TraesCS5A02G159600	171.512	83.7571	259.266	3.09545	1.63015	0.042549	0.231889	Up	3.89009	2.91175	3.73383	11.4277	14.2003	9.43803	MYB73		GO:0003677	DNA binding
148	TraesCS1A02G220200	720.701	351.897	1089.51	3.09609	1.63045	0.0359469	0.208384	Up	14.1909	11.67	8.41316	34.077	37.4666	30.5826	ATG3	Autophagy-related protein 3 [Source:UniProtKB/TrEMBL;Acc:W4ZQ08]	GO:0006914,GO:0005737,GO:0015031,GO:0005829	autophagy|cytoplasm|protein transport|cytosol	ko04140	Regulation of autophagy
149	TraesCS7B02G237200	204.558	99.8373	309.278	3.09782	1.63125	0.02277	0.156058	Up	9.33551	6.82109	7.84925	18.1594	34.2167	32.5244
150	TraesCS6A02G167300	680.54	332.112	1028.97	3.09826	1.63146	0.0451907	0.240688	Up	8.65752	8.50873	11.1513	28.9121	30.9817	20.4044	CSY4	Citrate synthase [Source:UniProtKB/TrEMBL;Acc:A0A1D6AIF0]	GO:0006099,GO:0004108,GO:0046912,GO:0006101	tricarboxylic acid cycle|citrate (Si)-synthase activity|transferase activity, transferring acyl groups, acyl groups converted into alkyl on transfer|citrate metabolic process	ko01230,ko00020,ko00630,ko01210,ko01200	Biosynthesis of amino acids|Citrate cycle (TCA cycle)|Glyoxylate and dicarboxylate metabolism|2-Oxocarboxylic acid metabolism|Carbon metabolism
151	TraesCS7A02G439200	282.646	137.906	427.385	3.0991	1.63185	0.0322116	0.19453	Up	20.1575	7.15317	0.65584	31.9805	33.391	32.6768	GMPM1		GO:0009793	embryo development ending in seed dormancy
152	TraesCS3D02G157400	41.9354	20.4556	63.4153	3.10015	1.63234	0.039144	0.220209	Up	1.34454	0.64325	0.0983964	1.32516	1.91293	2.98099	MTM1
153	TraesCS1A02G199600	43.5258	21.2142	65.8373	3.10345	1.63387	0.0473347	0.247578	Up	0.68355	0.868709	0.791701	2.25236	3.51816	2.80633	MADS56		GO:0003700,GO:0005634,GO:0003677,GO:0006355,GO:0046983,GO:0045944,GO:0000977,GO:0006351	DNA-binding transcription factor activity|nucleus|DNA binding|regulation of transcription, DNA-templated|protein dimerization activity|positive regulation of transcription by RNA polymerase II|RNA polymerase II regulatory region sequence-specific DNA binding|transcription, DNA-templated
154	TraesCS7B02G297700	33.7108	16.4292	50.9924	3.10378	1.63402	0.0473776	0.247689	Up	0.240413	0.409446	0.999721	1.71046	2.20481	2.43925	CCR1		GO:0003824,GO:0050662	catalytic activity|coenzyme binding
155	TraesCS3D02G536700	724.187	352.822	1095.55	3.10511	1.63464	0.0161729	0.124627	Up	12.7222	4.62795	14.2088	24.685	14.0148	35.1914			GO:0046872	metal ion binding
156	TraesCS2B02G040000	44.2522	21.5527	66.9518	3.10643	1.63526	0.048493	0.251144	Up	1.34743	0.95947	0.448854	1.62775	5.26572	2.94602	OPR4		GO:0016491,GO:0003824,GO:0010181,GO:0055114,GO:0016629	oxidoreductase activity|catalytic activity|FMN binding|oxidation-reduction process|12-oxophytodienoate reductase activity	ko00592	alpha-Linolenic acid metabolism
157	TraesCS3D02G408500	350.003	170.426	529.579	3.10737	1.6357	0.0351913	0.205686	Up	3.59289	3.73996	4.85545	13.0172	12.6278	12.0557	MRS2-F		GO:0016021	integral component of membrane
158	TraesCS3A02G537600	201.996	98.3522	305.64	3.10761	1.63581	0.0421474	0.230626	Up	2.71513	2.24168	2.3174	7.30806	8.61805	6.33675	P58B		GO:0005515	protein binding	ko04141	Protein processing in endoplasmic reticulum
159	TraesCS1B02G229000	415.64	202.154	629.126	3.11211	1.63789	0.0423702	0.231308	Up	8.42032	5.62581	3.5049	13.947	36.7825	14.3807	BAM3	Beta-amylase [Source:UniProtKB/TrEMBL;Acc:A0A1D5S9R7]	GO:0000272,GO:0016161,GO:0005983,GO:0000024,GO:0009409,GO:0102229,GO:0009570	polysaccharide catabolic process|beta-amylase activity|starch catabolic process|maltose biosynthetic process|response to cold|amylopectin maltohydrolase activity|chloroplast stroma	ko00500	Starch and sucrose metabolism
160	TraesCS6B02G113900	1245.94	605.191	1886.69	3.11752	1.6404	0.0288561	0.181962	Up	24.6607	26.0936	21.2339	84.4877	73.4711	80.5796	BI1	BAXI.2 [Source:UniProtKB/TrEMBL;Acc:C0LF36]	GO:0016021,GO:0016020	integral component of membrane|membrane
161	TraesCS2D02G211800	222.855	108.144	337.567	3.12145	1.64222	0.035461	0.206644	Up	6.97072	3.34793	1.14698	12.3184	14.1334	12.3122			GO:0016021,GO:0016020	integral component of membrane|membrane
162	TraesCS7B02G256700	72.6643	35.2256	110.103	3.12565	1.64416	0.0461303	0.243865	Up	0.637378	0.605871	0.65409	1.28345	2.91724	1.64471	PCMP-E55		GO:0071949	FAD binding
163	TraesCS2D02G335300	1713.85	829.796	2597.9	3.13077	1.64652	0.0469493	0.24635	Up	4.12171	14.3272	16.1633	39.3148	36.7986	22.3832	cao1	Amine oxidase [Source:UniProtKB/TrEMBL;Acc:A0A341RMH3]	GO:0005507,GO:0048038,GO:0055114,GO:0009308,GO:0008131	copper ion binding|quinone binding|oxidation-reduction process|amine metabolic process|primary amine oxidase activity	ko00260,ko00950,ko00350,ko00410,ko00960,ko00360	Glycine, serine and threonine metabolism|Isoquinoline alkaloid biosynthesis|Tyrosine metabolism|beta-Alanine metabolism|Tropane, piperidine and pyridine alkaloid biosynthesis|Phenylalanine metabolism
164	TraesCS2D02G452300	119.027	57.6257	180.428	3.13104	1.64664	0.0454599	0.241621	Up	2.68332	1.70657	1.72817	5.54293	11.9414	5.59068	PUP11		GO:0016021,GO:0005215,GO:0016020,GO:0015211,GO:0015860	integral component of membrane|transporter activity|membrane|purine nucleoside transmembrane transporter activity|purine nucleoside transmembrane transport
165	TraesCS4A02G078300	142.656	69.0469	216.266	3.13216	1.64716	0.0178649	0.133181	Up	3.39269	1.35425	2.97733	7.57363	6.86625	13.626	At1g01500		GO:0016021	integral component of membrane
166	TraesCS6D02G028000	218.05	105.463	330.636	3.1351	1.64851	0.0487331	0.251773	Up	4.19184	3.77233	3.39323	11.2922	13.9717	8.19258			GO:0016021	integral component of membrane
167	TraesCS3A02G382100	99.4985	48.1177	150.879	3.13563	1.64876	0.0397955	0.222608	Up	1.3836	1.37662	2.33596	5.06444	7.65295	5.70837	NPF5.10		GO:0016021,GO:0022857,GO:0016020,GO:0055085	integral component of membrane|transmembrane transporter activity|membrane|transmembrane transport
168	TraesCS6A02G370500	203.492	98.3872	308.598	3.13656	1.64918	0.0492309	0.253396	Up	1.14879	2.92796	2.19651	6.59272	7.77593	4.42338	At5g35200		GO:0005545,GO:0030136,GO:0048268,GO:0030276,GO:0005543	1-phosphatidylinositol binding|clathrin-coated vesicle|clathrin coat assembly|clathrin binding|phospholipid binding
169	TraesCS4B02G052300	388.6	187.81	589.391	3.13824	1.64996	0.0101164	0.0909283	Up	3.72975	4.48069	7.58662	9.40811	18.7185	28.8211	GAD1	Glutamate decarboxylase [Source:UniProtKB/TrEMBL;Acc:W5EDT9]	GO:0030170,GO:0003824,GO:0004351,GO:0006536,GO:0019752,GO:0016831	pyridoxal phosphate binding|catalytic activity|glutamate decarboxylase activity|glutamate metabolic process|carboxylic acid metabolic process|carboxy-lyase activity	ko00410,ko00430,ko00650,ko00250,ko02024	beta-Alanine metabolism|Taurine and hypotaurine metabolism|Butanoate metabolism|Alanine, aspartate and glutamate metabolism|Quorum sensing
170	TraesCS7A02G254500	371.813	179.666	563.96	3.13894	1.65028	0.0404232	0.224722	Up	8.41491	6.53139	4.64914	28.6167	22.3182	18.8864
171	TraesCS7A02G060700	243.479	117.613	369.345	3.14034	1.65092	0.0351418	0.20554	Up	4.77816	4.34281	3.76958	13.6327	23.7032	13.4393	XBOS36		GO:0005515	protein binding
172	TraesCS5D02G303600	522.451	252.293	792.609	3.14162	1.65151	0.0430885	0.233739	Up	8.52651	6.08125	5.90713	21.9235	20.0641	15.3108	SPAC29B12.11c
173	TraesCS2B02G218900	184.416	89.0068	279.825	3.14386	1.65254	0.043244	0.234163	Up	1.61068	1.20333	1.25405	4.25538	4.3208	3.25093	MGP		GO:0003676	nucleic acid binding
174	TraesCS5A02G326100	3859.11	1862.38	5855.84	3.14428	1.65273	0.0439077	0.236367	Up	88.4143	61.5563	55.9209	228.781	299.425	150.485	CCP1		GO:0008234,GO:0006508,GO:0008233	cysteine-type peptidase activity|proteolysis|peptidase activity	ko04142,ko04210	Lysosome|Apoptosis
175	TraesCS4A02G494700	1305.41	629.62	1981.21	3.14667	1.65383	0.0272638	0.175687	Up	7.81869	9.90466	12.8363	29.8392	35.6168	32.4678	ACX1	Acyl-coenzyme A oxidase [Source:UniProtKB/TrEMBL;Acc:W5DVJ7]	GO:0071949,GO:0055114,GO:0006631,GO:0016627,GO:0050660,GO:0003997,GO:0005777,GO:0006635	FAD binding|oxidation-reduction process|fatty acid metabolic process|oxidoreductase activity, acting on the CH-CH group of donors|flavin adenine dinucleotide binding|acyl-CoA oxidase activity|peroxisome|fatty acid beta-oxidation	ko04024,ko00592,ko00071,ko04146,ko01040,ko01212	cAMP signaling pathway|alpha-Linolenic acid metabolism|Fatty acid degradation|Peroxisome|Biosynthesis of unsaturated fatty acids|Fatty acid metabolism
176	TraesCS4B02G188100	46.9519	22.6373	71.2666	3.1482	1.65453	0.0476691	0.248726	Up	0.424975	0.939812	0.356508	2.24669	1.33515	1.9968	XXT1		GO:0016021,GO:0016757	integral component of membrane|transferase activity, transferring glycosyl groups
177	TraesCS6B02G192900	527.482	254.24	800.724	3.14948	1.65512	0.0477603	0.24883	Up	21.8725	18.1054	18.172	65.2523	65.3136	43.1618	SAP4		GO:0003677,GO:0008270	DNA binding|zinc ion binding
178	TraesCS1D02G213900	278.601	134.277	422.926	3.14964	1.65519	0.0353583	0.206286	Up	2.71066	2.17592	3.18264	9.72942	8.44811	7.25733	At1g63370	Flavin-containing monooxygenase [Source:UniProtKB/TrEMBL;Acc:A0A1D6DDM0]	GO:0055114,GO:0004499,GO:0050660,GO:0050661	oxidation-reduction process|N,N-dimethylaniline monooxygenase activity|flavin adenine dinucleotide binding|NADP binding
179	TraesCS2B02G314700	59.5335	28.6887	90.3783	3.15031	1.65549	0.0290058	0.182561	Up	0.558998	0.477742	0.556966	1.39636	1.21912	2.29774	SPBC18H10.05		GO:0005515	protein binding
180	TraesCS1B02G213600	327.23	157.685	496.776	3.15042	1.65555	0.026212	0.171807	Up	0.983099	1.6078	5.0607	7.13784	13.3798	8.71899	ERD3		GO:0016021,GO:0008168	integral component of membrane|methyltransferase activity
181	TraesCS5D02G297200	335.184	161.42	508.948	3.15293	1.65669	0.0139207	0.112909	Up	4.43935	3.98071	4.84905	8.49175	12.7818	19.1565	PAT07	S-acyltransferase [Source:UniProtKB/TrEMBL;Acc:A0A341WHM6]			ko04391	Hippo signaling pathway - fly
182	TraesCS7A02G195700	67.2303	32.3683	102.092	3.15408	1.65722	0.0396386	0.222087	Up	1.29611	2.68452	1.72242	5.55414	7.7737	6.08071			GO:0016021	integral component of membrane
183	TraesCS6B02G343600	29.879	14.3852	45.3728	3.15413	1.65724	0.0404117	0.224705	Up	0.306724	0.996251	0.762795	1.37437	3.36973	3.02332	CXE15		GO:0016787	hydrolase activity
184	TraesCS2A02G192500	46.0441	22.1593	69.9289	3.15574	1.65798	0.0359081	0.20831	Up	0.751008	0.885379	0.550496	1.9287	2.55654	2.94569	At4g10955
185	TraesCS7B02G146400	451.925	217.422	686.429	3.15714	1.65862	0.0412994	0.227572	Up	16.3446	10.1342	11.955	44.4874	52.0527	31.9784	SAP1		GO:0003677,GO:0008270	DNA binding|zinc ion binding
186	TraesCS1D02G053700	1617.86	778.109	2457.61	3.15844	1.65921	0.0326305	0.196187	Up	37.2883	27.4431	33.2257	126.161	129.357	100.676
187	TraesCS1B02G044800	41.1658	19.793	62.5386	3.15963	1.65976	0.020154	0.143982	Up	0.0263099	1.00717	0.781696	1.4353	2.53876	3.89975	At4g32285		GO:0005545,GO:0030136,GO:0048268,GO:0030276,GO:0005543	1-phosphatidylinositol binding|clathrin-coated vesicle|clathrin coat assembly|clathrin binding|phospholipid binding
188	TraesCS6B02G346700	96.8554	46.5639	147.147	3.16011	1.65997	0.0207918	0.146784	Up	3.25903	2.03506	1.45534	5.49289	10.0937	11.8964	HSP24.1				ko04141	Protein processing in endoplasmic reticulum
189	TraesCS5A02G500000	65.2966	31.3838	99.2093	3.16116	1.66046	0.0314743	0.191676	Up	0.256292	0.720943	1.49495	1.52384	2.97755	3.0237	BSK1-2		GO:0005524,GO:0004672,GO:0006468,GO:0005515	ATP binding|protein kinase activity|protein phosphorylation|protein binding	ko04075	Plant hormone signal transduction
190	TraesCS7A02G344600	205.932	98.8973	312.968	3.16457	1.66201	0.046926	0.246276	Up	3.67014	3.02304	4.01448	13.5242	10.8613	8.65056	PHR2
191	TraesCS3A02G531200	665.564	319.352	1011.78	3.16822	1.66367	0.0100714	0.0906766	Up	22.4246	25.9516	44.2826	66.8754	75.9168	158.857	MT2C		GO:0046872	metal ion binding
192	TraesCS6B02G069800	122.541	58.7907	186.291	3.16871	1.6639	0.0304462	0.187892	Up	1.61506	1.48714	1.3534	3.41027	5.97134	4.21783	PIX13		GO:0005524,GO:0004672,GO:0004674,GO:0006468	ATP binding|protein kinase activity|protein serine/threonine kinase activity|protein phosphorylation
193	TraesCS2B02G239600	933.99	447.83	1420.15	3.17118	1.66502	0.0349859	0.204932	Up	63.2556	54.4065	43.7756	207.892	190.433	142.324	H2A-4	Protein H2A.7 [Source:UniProtKB/Swiss-Prot;Acc:Q43312]	GO:0005634,GO:0003677,GO:0000786,GO:0046982,GO:0005694	nucleus|DNA binding|nucleosome|protein heterodimerization activity|chromosome
194	TraesCS6D02G096300	297.806	142.739	452.874	3.17275	1.66573	0.0330139	0.197582	Up	7.12432	4.29163	4.62579	19.8537	14.4768	16.6415	NAM-A1		GO:0005634,GO:0003677,GO:0006355	nucleus|DNA binding|regulation of transcription, DNA-templated
195	TraesCS6A02G234600	158.298	75.8641	240.732	3.1732	1.66594	0.0474998	0.248166	Up	1.72461	1.57034	1.65169	4.35589	5.84346	3.44413			GO:0016021	integral component of membrane
196	TraesCS6B02G291400	59.3567	28.4427	90.2707	3.17377	1.6662	0.0263017	0.172092	Up	1.25216	0.836039	1.50689	2.31666	5.99705	5.58529
197	TraesCS6D02G379900	253.192	121.234	385.151	3.17693	1.66763	0.0270893	0.17495	Up	2.35013	1.99472	1.53044	5.55336	5.59271	6.66273	LPA1
198	TraesCS7A02G329800	550.821	263.735	837.908	3.17709	1.6677	0.0463501	0.244535	Up	3.66858	3.59978	3.90795	11.6811	10.5955	7.08144
199	TraesCS2D02G503000	3687.96	1765.43	5610.49	3.17798	1.66811	0.0308678	0.189631	Up	21.7716	17.427	29.2831	54.5405	97.6814	57.4642	ha1	Plasma membrane ATPase [Source:UniProtKB/TrEMBL;Acc:A0A1D5UMU8]	GO:0016021,GO:0046872,GO:0005524,GO:0005886,GO:0000166,GO:0008553,GO:0120029,GO:0016020,GO:0006811	integral component of membrane|metal ion binding|ATP binding|plasma membrane|nucleotide binding|proton-exporting ATPase activity, phosphorylative mechanism|proton export across plasma membrane|membrane|ion transport	ko00190	Oxidative phosphorylation
200	TraesCS2B02G195600	909.81	435.298	1384.32	3.18017	1.66911	0.0290914	0.182817	Up	14.1315	17.5767	19.547	53.1986	67.856	49.0259	TIFY10B				ko04075	Plant hormone signal transduction
201	TraesCS3A02G075600	398.179	190.455	605.904	3.18135	1.66964	0.0464298	0.244779	Up	3.48914	3.03025	2.6513	12.5811	8.44355	6.71565
202	TraesCS4B02G097000	289.625	138.408	440.842	3.18509	1.67133	0.0390156	0.219687	Up	8.52692	6.33092	6.98737	26.5347	21.1346	20.1457	NIFU2		GO:0005506,GO:0051536,GO:0016226	iron ion binding|iron-sulfur cluster binding|iron-sulfur cluster assembly
203	TraesCS6A02G276700	323.477	154.536	492.419	3.18644	1.67195	0.0426317	0.232166	Up	2.78839	2.28252	2.5062	8.59852	8.28053	5.74601	HSP70-17		GO:0005524	ATP binding	ko04141	Protein processing in endoplasmic reticulum
204	TraesCS5A02G097100	125.328	59.8439	190.813	3.18851	1.67288	0.0442423	0.237466	Up	1.29424	1.21593	1.64206	3.85069	5.11526	3.16278	VIL1		GO:0005515	protein binding
205	TraesCS7A02G408600	306.897	146.542	467.253	3.18853	1.67289	0.0454084	0.241476	Up	3.51893	3.72563	2.82685	13.7043	12.8393	8.31964	SKIP31		GO:0005515	protein binding
206	TraesCS4B02G371300	223.245	106.542	339.949	3.19075	1.67389	0.0459733	0.243381	Up	4.47249	4.42489	4.20125	11.7013	18.6989	8.87628	pdf1		GO:0098599	palmitoyl hydrolase activity	ko04142,ko00062,ko01212	Lysosome|Fatty acid elongation|Fatty acid metabolism
207	TraesCS1D02G206900	223.729	106.757	340.701	3.19137	1.67417	0.0479393	0.249356	Up	2.79295	2.35791	2.07896	8.36355	8.54021	5.00678	BSK1-2		GO:0005524,GO:0004672,GO:0006468,GO:0005515	ATP binding|protein kinase activity|protein phosphorylation|protein binding	ko04075	Plant hormone signal transduction
208	TraesCS2D02G596000	383.077	182.779	583.376	3.19171	1.67433	0.0446266	0.238772	Up	5.04915	3.99911	5.65289	15.3298	15.9102	9.8825	EXO70A1	Exocyst subunit Exo70 family protein [Source:UniProtKB/TrEMBL;Acc:A0A1D5UPG4]	GO:0015031,GO:0000145,GO:0006887	protein transport|exocyst|exocytosis
209	TraesCS4D02G301700	173.478	82.6928	264.263	3.19572	1.67614	0.0282076	0.179554	Up	5.90103	5.26492	4.22361	12.5401	22.8977	17.4217
210	TraesCS4D02G276400	2330.29	1110.62	3549.96	3.19637	1.67644	0.0265889	0.173246	Up	56.6505	47.3884	50.3389	165.026	132.983	155.219	ARD2	1,2-dihydroxy-3-keto-5-methylthiopentene dioxygenase [Source:UniProtKB/TrEMBL;Acc:W5DWS0]	GO:0005737,GO:0016491,GO:0005634,GO:0005506,GO:0055114,GO:0019509,GO:0010309,GO:0046872,GO:0008652,GO:0051213,GO:0009086	cytoplasm|oxidoreductase activity|nucleus|iron ion binding|oxidation-reduction process|L-methionine salvage from methylthioadenosine|acireductone dioxygenase [iron(II)-requiring] activity|metal ion binding|cellular amino acid biosynthetic process|dioxygenase activity|methionine biosynthetic process	ko00270	Cysteine and methionine metabolism
211	TraesCS7D02G142400	195.005	92.9268	297.083	3.19696	1.6767	0.0234244	0.159193	Up	6.08151	3.14434	1.16586	4.73626	14.5805	22.778	SRG1		GO:0046872,GO:0016491,GO:0055114	metal ion binding|oxidoreductase activity|oxidation-reduction process
212	TraesCS4B02G213700	219.752	104.648	334.856	3.19983	1.678	0.0337778	0.200319	Up	2.69894	3.24806	3.24643	8.24871	11.2169	8.82126	PXN		GO:0016021,GO:0005774,GO:0005777,GO:0044375,GO:0043132,GO:0016020	integral component of membrane|vacuolar membrane|peroxisome|regulation of peroxisome size|NAD transport|membrane	ko04146	Peroxisome
213	TraesCS7B02G345700	368.448	175.427	561.469	3.20059	1.67834	0.0317968	0.192912	Up	8.33959	7.95503	7.46667	30.1949	36.8918	25.4086	DJ1E				ko00620	Pyruvate metabolism
214	TraesCS6A02G136700	3188.81	1518.01	4859.6	3.20129	1.67865	0.0471572	0.246972	Up	93.8498	95.1363	71.9544	342.456	281.164	157.839			GO:0005515	protein binding
215	TraesCS4D02G061800	890.208	423.597	1356.82	3.20309	1.67947	0.0240742	0.161899	Up	13.0323	9.47974	10.3037	30.1833	28.3979	35.8626	ISPH		GO:0046872,GO:0046429,GO:0019288,GO:0050992,GO:0051745,GO:0009570	metal ion binding|4-hydroxy-3-methylbut-2-en-1-yl diphosphate synthase activity|isopentenyl diphosphate biosynthetic process, methylerythritol 4-phosphate pathway|dimethylallyl diphosphate biosynthetic process|4-hydroxy-3-methylbut-2-en-1-yl diphosphate reductase activity|chloroplast stroma	ko00900	Terpenoid backbone biosynthesis
216	TraesCS6A02G357200	1371.46	652.094	2090.83	3.20633	1.68092	0.0306767	0.188849	Up	13.8357	10.9002	20.8648	44.606	51.7657	39.4918	Os02g0794700		GO:0005737,GO:0030145,GO:0005622,GO:0004177,GO:0019538,GO:0008235,GO:0006508	cytoplasm|manganese ion binding|intracellular|aminopeptidase activity|protein metabolic process|metalloexopeptidase activity|proteolysis
217	TraesCS7D02G129700	193.649	92.0701	295.229	3.20657	1.68103	0.0329644	0.197381	Up	2.09064	1.75896	3.0949	7.46297	9.93492	7.00256	DTX27	Protein DETOXIFICATION [Source:UniProtKB/TrEMBL;Acc:A0A1D6CXT8]	GO:0016021,GO:0016020,GO:0055085,GO:0015238,GO:0015297,GO:0006855	integral component of membrane|membrane|transmembrane transport|GO_0015238|antiporter activity|drug transmembrane transport
218	TraesCS7A02G385900	583.863	277.337	890.389	3.2105	1.6828	0.0418781	0.229569	Up	7.34477	5.05857	6.38971	22.3979	20.3915	14.5087			GO:0009639,GO:0009959	response to red or far red light|negative gravitropism
219	TraesCS4D02G302500	142.19	67.5149	216.866	3.21212	1.68353	0.0471512	0.246968	Up	1.75847	1.83132	2.50838	7.54569	10.8448	4.98946	DTX27	Protein DETOXIFICATION [Source:UniProtKB/TrEMBL;Acc:A0A1D5Y283]	GO:0016021,GO:0016020,GO:0055085,GO:0015238,GO:0015297,GO:0006855	integral component of membrane|membrane|transmembrane transport|GO_0015238|antiporter activity|drug transmembrane transport
220	TraesCS5B02G489100	88.6839	42.1083	135.259	3.21218	1.68355	0.0424728	0.231568	Up	0.673205	0.645677	0.89034	2.2205	3.38352	2.12748			GO:0005515	protein binding
221	TraesCS4B02G254300	64.6858	30.7046	98.667	3.21343	1.68411	0.0413365	0.227682	Up	1.05976	1.29412	0.856545	2.49688	5.1556	3.18342	NRAMP2		GO:0016021,GO:0030001,GO:0016020,GO:0046873	integral component of membrane|metal ion transport|membrane|metal ion transmembrane transporter activity	ko04142	Lysosome
222	TraesCS2D02G338000	169.56	80.4616	258.657	3.21467	1.68467	0.0391022	0.220002	Up	3.93531	1.94781	1.88204	9.79079	5.31276	7.39059			GO:0004553,GO:0005975	hydrolase activity, hydrolyzing O-glycosyl compounds|carbohydrate metabolic process
223	TraesCS5B02G494500	117.917	55.9549	179.88	3.21474	1.6847	0.0377027	0.214967	Up	1.55124	0.920185	1.02755	4.14321	4.54499	3.57226	SCL9
224	TraesCS7A02G335400	821.846	389.889	1253.8	3.21579	1.68517	0.0356455	0.207343	Up	2.52821	2.54663	2.04785	10.3151	15.2087	5.5606	ATX1		GO:0046872,GO:0030001	metal ion binding|metal ion transport
225	TraesCS5A02G048900	120.863	57.3331	184.393	3.21618	1.68535	0.0437425	0.235805	Up	4.38565	3.30096	3.93312	13.9488	10.9681	11.0538	LOL2
226	TraesCS1D02G214100	110.937	52.604	169.271	3.21783	1.68609	0.0367224	0.211396	Up	0.963184	0.809922	1.269	3.08265	2.91216	2.78519	ORP2A
227	TraesCS4D02G040900	372.473	176.528	568.419	3.22	1.68706	0.0443258	0.237708	Up	8.1216	7.31042	6.85647	22.1521	25.2507	16.1212	Os03g0708100		GO:0005886,GO:0048244,GO:0055114	plasma membrane|phytanoyl-CoA dioxygenase activity|oxidation-reduction process	ko04146	Peroxisome
228	TraesCS6B02G357000	174.411	82.6476	266.174	3.22059	1.68732	0.0497007	0.254811	Up	2.59421	2.55251	3.31049	10.5009	10.4089	5.71269
229	TraesCS3B02G364500	79.6694	37.7487	121.59	3.22104	1.68753	0.0390205	0.219699	Up	1.2796	0.394189	1.24028	2.82812	3.63441	2.91517	LECRK41		GO:0016021,GO:0030246,GO:0005524,GO:0004672,GO:0006468,GO:0016020	integral component of membrane|carbohydrate binding|ATP binding|protein kinase activity|protein phosphorylation|membrane
230	TraesCS6A02G328700	110.775	52.4707	169.08	3.22237	1.68812	0.0208603	0.147002	Up	3.8474	3.7499	4.42774	9.27842	18.2116	16.8832	SAUR32		GO:0009733	response to auxin	ko04075	Plant hormone signal transduction
231	TraesCS3B02G393800	54.0256	25.582	82.4691	3.22372	1.68873	0.0465812	0.245247	Up	0.340382	0.749485	0.972317	2.53271	2.83225	2.00907	NFD4		GO:0016021,GO:0055085,GO:0016020,GO:0005887	integral component of membrane|transmembrane transport|membrane|integral component of plasma membrane
232	TraesCS4D02G169600	158.562	75.0803	242.044	3.2238	1.68876	0.0418252	0.229478	Up	3.13696	2.37738	2.80525	10.2005	7.75559	6.86662			GO:0005515	protein binding
233	TraesCS1B02G047900	28.0831	13.296	42.8702	3.22429	1.68898	0.0268037	0.173806	Up	0	0.508827	0.372846	1.14694	0.709039	1.99051	CHX20		GO:0016021,GO:0055085,GO:0005783,GO:0015299,GO:0006885,GO:0030007,GO:0030104,GO:0006812,GO:0006623	integral component of membrane|transmembrane transport|endoplasmic reticulum|solute:proton antiporter activity|regulation of pH|cellular potassium ion homeostasis|water homeostasis|cation transport|protein targeting to vacuole
234	TraesCS5B02G283800	414.551	196.25	632.851	3.22471	1.68917	0.0269905	0.174504	Up	5.55135	3.5369	5.21715	9.60182	21.4816	13.8138	PYD3		GO:0006807	nitrogen compound metabolic process	ko00770,ko00240,ko00983,ko00410	Pantothenate and CoA biosynthesis|Pyrimidine metabolism|Drug metabolism - other enzymes|beta-Alanine metabolism
235	TraesCS7B02G332200	367.27	173.84	560.699	3.22536	1.68946	0.0328627	0.197051	Up	6.00478	4.3481	4.5386	16.4563	16.7363	14.4034
236	TraesCS3A02G208700	860.546	407.101	1313.99	3.22768	1.6905	0.0422743	0.231082	Up	6.52546	8.48817	10.6549	37.6147	36.7664	19.3396	CHUP1
237	TraesCS6A02G222800	2243.72	1060.58	3426.86	3.23114	1.69204	0.0267283	0.173595	Up	25.3279	20.2733	26.0977	71.0342	96.1313	69.164	ZB8		GO:0005737,GO:0003824,GO:0006559,GO:0016841	cytoplasm|catalytic activity|L-phenylalanine catabolic process|ammonia-lyase activity	ko00940,ko00360	Phenylpropanoid biosynthesis|Phenylalanine metabolism
238	TraesCS1B02G253200	27.3205	12.9105	41.7305	3.23229	1.69256	0.049869	0.255347	Up	0.542453	0.438817	1.12186	0.561572	4.83189	2.45792	SRS7
239	TraesCS2D02G264300	468.465	221.29	715.641	3.23396	1.6933	0.0470429	0.246647	Up	3.89828	2.48355	4.44268	11.3643	12.2782	6.66951			GO:0008017,GO:0000226,GO:0004674,GO:0099738,GO:0046777,GO:0009819,GO:0045926,GO:0005515	microtubule binding|microtubule cytoskeleton organization|protein serine/threonine kinase activity|cell cortex region|protein autophosphorylation|drought recovery|negative regulation of growth|protein binding
240	TraesCS5D02G439400	67.1189	31.7046	102.533	3.23401	1.69332	0.0478904	0.249248	Up	0.842063	0.754103	1.8552	4.19206	4.58227	3.29285
241	TraesCS5A02G159000	330.862	156.223	505.5	3.23575	1.6941	0.0461866	0.244027	Up	3.14276	3.2691	3.6243	14.413	10.5738	7.22155	CXIP4		GO:0003676,GO:0008270	nucleic acid binding|zinc ion binding
242	TraesCS3D02G287400	553.965	261.544	846.386	3.23612	1.69426	0.0367077	0.211387	Up	19.2558	16.5573	20.0424	78.7267	64.3796	49.648	At5g11770		GO:0046872,GO:0048038,GO:0008137,GO:0055114,GO:0051539,GO:0051536	metal ion binding|quinone binding|NADH dehydrogenase (ubiquinone) activity|oxidation-reduction process|4 iron, 4 sulfur cluster binding|iron-sulfur cluster binding	ko00190	Oxidative phosphorylation
243	TraesCS7D02G435200	1065.98	503.243	1628.71	3.23642	1.6944	0.0365761	0.210827	Up	44.3681	51.0266	41.6143	198.439	164.738	120.054			GO:0016021	integral component of membrane
244	TraesCS2B02G261500	190.718	90.0294	291.407	3.2368	1.69457	0.0454479	0.241574	Up	3.37727	2.50624	2.63499	8.74431	11.4313	6.55486	RE		GO:0016021	integral component of membrane
245	TraesCS5B02G194400	433.149	204.256	662.042	3.24124	1.69654	0.0285912	0.180961	Up	6.90445	6.13771	7.32454	22.1864	19.2518	20.5194	TIF34		GO:0005515	protein binding	ko03013	RNA transport
246	TraesCS2D02G183700	285.436	134.6	436.273	3.24125	1.69655	0.0478765	0.249243	Up	6.90197	4.63355	5.81577	21.2358	27.4585	11.7495	AFP-D1		GO:0007165,GO:0005634	signal transduction|nucleus
247	TraesCS2B02G507200	51.1923	24.132	78.2526	3.24269	1.69719	0.0262314	0.171921	Up	2.98206	1.40136	2.47585	5.78145	8.71097	12.0261
248	TraesCS4D02G209500	144.813	68.2547	221.372	3.24332	1.69747	0.0446288	0.238772	Up	3.62012	3.18093	3.55594	14.3185	11.7274	9.11057	RHC2A		GO:0061630,GO:0016567	ubiquitin protein ligase activity|protein ubiquitination
249	TraesCS7D02G337900	43.3191	20.4172	66.221	3.2434	1.69751	0.0394121	0.221235	Up	1.29603	0.912525	0.873173	1.94196	4.21667	3.5557	PAI1		GO:0003824,GO:0004640,GO:0006568	catalytic activity|phosphoribosylanthranilate isomerase activity|tryptophan metabolic process	ko01230,ko00400	Biosynthesis of amino acids|Phenylalanine, tyrosine and tryptophan biosynthesis
250	TraesCS1D02G150400	318.892	150.25	487.533	3.24481	1.69813	0.0477329	0.24883	Up	2.77105	2.35454	2.73571	8.72894	9.02728	4.91019	BRO1		GO:0005515	protein binding	ko04144	Endocytosis
251	TraesCS3D02G442100	375.863	177.039	574.686	3.2461	1.69871	0.0344271	0.202699	Up	4.39345	4.35328	4.30835	16.7643	14.2229	11.5677	Os01g0505400		GO:0003824,GO:0000287,GO:0030976	catalytic activity|magnesium ion binding|thiamine pyrophosphate binding	ko04146	Peroxisome
252	TraesCS1A02G203400	293.281	138.119	448.444	3.2468	1.69902	0.0449495	0.239901	Up	4.02505	2.96362	2.87224	12.0663	10.5436	6.89036	BSK1-2		GO:0005524,GO:0004672,GO:0006468,GO:0005515	ATP binding|protein kinase activity|protein phosphorylation|protein binding	ko04075	Plant hormone signal transduction
253	TraesCS6A02G213100	466.848	219.809	713.888	3.24776	1.69944	0.0267648	0.173673	Up	12.8302	8.92484	13.2251	41.1766	40.8349	36.7956	KCR1		GO:0016021	integral component of membrane	ko01212,ko01040,ko00062,ko00140	Fatty acid metabolism|Biosynthesis of unsaturated fatty acids|Fatty acid elongation|Steroid hormone biosynthesis
254	TraesCS3A02G172900	370.28	174.326	566.235	3.24815	1.69962	0.04356	0.235254	Up	7.13895	6.02149	7.30217	26.023	29.1909	14.4526	SAR1A		GO:0006886,GO:0005622,GO:0005525,GO:0005783,GO:0005794,GO:0016192,GO:0000166,GO:0015031	intracellular protein transport|intracellular|GTP binding|endoplasmic reticulum|Golgi apparatus|vesicle-mediated transport|nucleotide binding|protein transport	ko04141	Protein processing in endoplasmic reticulum
255	TraesCS3D02G292300	343.268	161.596	524.941	3.24847	1.69976	0.0338102	0.200417	Up	16.1432	13.2944	9.80755	40.2465	48.2367	34.07	At4g28440				ko03430,ko03030,ko03460,ko03440,ko03420	Mismatch repair|DNA replication|Fanconi anemia pathway|Homologous recombination|Nucleotide excision repair
256	TraesCS2B02G429100	901.954	424.465	1379.44	3.24984	1.70037	0.0315722	0.191986	Up	22.8972	22.1161	31.683	79.0295	96.7438	61.0148	CSA	Glutathione peroxidase [Source:UniProtKB/TrEMBL;Acc:W5BE96]	GO:0006979,GO:0055114,GO:0004602,GO:0016491,GO:0004601,GO:0098869	response to oxidative stress|oxidation-reduction process|glutathione peroxidase activity|oxidoreductase activity|peroxidase activity|cellular oxidant detoxification	ko00480,ko00590	Glutathione metabolism|Arachidonic acid metabolism
257	TraesCS6B02G251800	166.422	78.3174	254.527	3.24994	1.70041	0.0319969	0.193715	Up	6.87578	3.32444	3.82967	14.3145	16.7365	14.7312
258	TraesCS2B02G304600	923.371	434.48	1412.26	3.25047	1.70065	0.0334504	0.199129	Up	4.76739	3.92044	7.07114	16.384	15.7569	12.2055	ML4		GO:0003676	nucleic acid binding
259	TraesCS6A02G344800	546.768	257.193	836.342	3.2518	1.70124	0.0317644	0.192788	Up	3.58846	2.35347	3.15785	10.0142	9.20422	8.43095	STY8		GO:0005524,GO:0004672,GO:0006468,GO:0005515	ATP binding|protein kinase activity|protein phosphorylation|protein binding
260	TraesCS3A02G302400	62.8507	29.5357	96.1656	3.25591	1.70306	0.0320067	0.19376	Up	3.17555	1.78403	1.86227	6.19752	9.42465	8.75407	PDCB1
261	TraesCS4B02G294000	86.7652	40.7603	132.77	3.25734	1.70369	0.0449624	0.239932	Up	2.64132	2.02771	1.04923	4.93278	10.0114	4.71811
262	TraesCS3D02G320600	1662.69	780.873	2544.5	3.25854	1.70422	0.0267118	0.17359	Up	55.8258	53.4518	56.1685	184.162	164.519	149.504	GOS2	Putative translation initiation factor [Source:UniProtKB/TrEMBL;Acc:E6Y3A2]	GO:0003743,GO:0006413	translation initiation factor activity|translational initiation	ko03013	RNA transport
263	TraesCS1B02G469200	109.941	51.628	168.254	3.25896	1.70441	0.039245	0.220638	Up	2.95329	4.01509	2.23862	10.733	14.2332	9.70428			GO:0016021	integral component of membrane
264	TraesCS4D02G054500	171.534	80.4821	262.587	3.26267	1.70605	0.0493676	0.253851	Up	2.71139	2.01409	3.14675	11.4387	8.85506	5.71484	ADK2
265	TraesCSU02G016900	116.154	54.4858	177.822	3.26363	1.70648	0.0443104	0.237687	Up	1.41139	1.24853	1.11911	4.68462	3.60548	3.15371	CPK4		GO:0005524,GO:0004672,GO:0005509,GO:0006468	ATP binding|protein kinase activity|calcium ion binding|protein phosphorylation
266	TraesCS7D02G387700	32.223	15.1134	49.3327	3.26416	1.70671	0.0236055	0.159983	Up	0.612648	1.26182	2.04917	3.44941	4.11587	7.77828	GDU1		GO:0016021,GO:0080143	integral component of membrane|regulation of amino acid export
267	TraesCS6B02G326500	756.181	354.637	1157.72	3.26453	1.70687	0.0204427	0.145299	Up	20.2955	14.1052	18.8918	40.4507	92.0784	63.4089	PXG5	Caleosin [Source:UniProtKB/TrEMBL;Acc:X4Y244]	GO:0005509	calcium ion binding
268	TraesCS5D02G100500	316.762	148.53	484.994	3.26529	1.70721	0.0399058	0.22283	Up	3.18876	2.70205	3.13087	10.8912	9.43187	6.92417		PAPA-1-like conserved region family protein 5D1a [Source:UniProtKB/TrEMBL;Acc:A0A0H3WMU0]	GO:0031011,GO:0006338	Ino80 complex|chromatin remodeling
269	TraesCS3D02G124100	356.587	167.115	546.058	3.26756	1.70822	0.0479888	0.249484	Up	2.50443	2.31516	1.7636	8.24173	6.89692	3.86689	GTE8		GO:0005515	protein binding
270	TraesCS3A02G202800	688.348	322.505	1054.19	3.26875	1.70874	0.024087	0.16192	Up	6.44714	7.18537	9.61473	21.5126	33.9632	24.7518	CAX1a	Vacuolar cation/proton exchanger [Source:UniProtKB/TrEMBL;Acc:A0A1D5V4B3]	GO:0016021,GO:0055085,GO:0008324,GO:0005774,GO:0015369,GO:0006812,GO:0006816	integral component of membrane|transmembrane transport|cation transmembrane transporter activity|vacuolar membrane|calcium:proton antiporter activity|cation transport|calcium ion transport
271	TraesCS4A02G035500	2679.53	1255.09	4103.97	3.26985	1.70923	0.0468763	0.246132	Up	17.2712	17.1899	24.1001	78.6266	67.7611	36.4456	CDC48D		GO:0005524,GO:0016787	ATP binding|hydrolase activity	ko04141	Protein processing in endoplasmic reticulum
272	TraesCS3D02G136100	149.056	69.803	228.308	3.27075	1.70962	0.0351199	0.205457	Up	4.28374	2.5155	2.53611	12.2479	11.4989	9.79519	PP2A1
273	TraesCS1B02G434000	3617.88	1693.98	5541.79	3.27147	1.70994	0.0255686	0.169057	Up	43.0888	39.676	57.6018	121.623	210.092	127.93			GO:0006629,GO:0004190,GO:0006508	lipid metabolic process|aspartic-type endopeptidase activity|proteolysis
274	TraesCS4A02G203300	143.886	67.3584	220.413	3.27224	1.71028	0.0444468	0.238181	Up	1.57692	1.39317	1.80878	5.4272	5.4931	3.64368	OsI_37456	Pyruvate kinase [Source:UniProtKB/TrEMBL;Acc:A0A341TN51]	GO:0003824,GO:0000287,GO:0006096,GO:0004743,GO:0030955,GO:0016301	catalytic activity|magnesium ion binding|glycolytic process|pyruvate kinase activity|potassium ion binding|kinase activity	ko01200,ko00620,ko00230,ko01230,ko00010	Carbon metabolism|Pyruvate metabolism|Purine metabolism|Biosynthesis of amino acids|Glycolysis / Gluconeogenesis
275	TraesCS6A02G059600	179.196	83.8743	274.517	3.27296	1.71059	0.0183801	0.135633	Up	4.35213	2.44843	2.95936	7.99115	11.0792	12.8357	gto2		GO:0004364,GO:0005515	glutathione transferase activity|protein binding
276	TraesCS5A02G199700	594.631	278.249	911.014	3.2741	1.7111	0.0285038	0.180551	Up	6.10914	4.73269	6.65336	16.0614	22.4849	15.8608	AAE17		GO:0016021,GO:0003824	integral component of membrane|catalytic activity
277	TraesCS1B02G248300	243.674	113.965	373.384	3.27631	1.71207	0.0361029	0.209031	Up	3.79577	1.8633	0.888111	5.56522	9.71179	5.5363	DGK1	Diacylglycerol kinase [Source:UniProtKB/TrEMBL;Acc:A0A096UKE0]	GO:0007165,GO:0016301,GO:0035556,GO:0004143,GO:0016021,GO:0005524,GO:0005622,GO:0003951,GO:0007205	signal transduction|kinase activity|intracellular signal transduction|diacylglycerol kinase activity|integral component of membrane|ATP binding|intracellular|NAD+ kinase activity|protein kinase C-activating G protein-coupled receptor signaling pathway
278	TraesCS1A02G380900	101.982	47.6884	156.276	3.27702	1.71238	0.013189	0.108691	Up	1.47095	1.71166	1.22788	3.29222	4.40837	7.52623	DTX14	Protein DETOXIFICATION [Source:UniProtKB/TrEMBL;Acc:A0A1D5RWF9]	GO:0016021,GO:0016020,GO:0055085,GO:0015238,GO:0015297,GO:0006855	integral component of membrane|membrane|transmembrane transport|GO_0015238|antiporter activity|drug transmembrane transport
279	TraesCS6A02G299100	55.5212	25.9569	85.0856	3.27796	1.7128	0.0493108	0.25364	Up	0.660025	0.42295	0.920593	2.65855	3.16642	2.08492	At1g14780
280	TraesCS7A02G071100	2388.45	1116.38	3660.53	3.27893	1.71323	0.0323517	0.195038	Up	17.0534	16.0899	26.6806	77.6623	51.5774	50.7291			GO:0003824,GO:0004802	catalytic activity|transketolase activity	ko00710,ko01200,ko01230,ko00030,ko01051	Carbon fixation in photosynthetic organisms|Carbon metabolism|Biosynthesis of amino acids|Pentose phosphate pathway|Biosynthesis of ansamycins
281	TraesCS2D02G595900	137.033	64.0483	210.018	3.27905	1.71328	0.0482007	0.250196	Up	3.41476	3.37933	1.91559	14.0378	12.4711	7.23838
282	TraesCS7A02G017600	228.007	106.542	349.473	3.28016	1.71377	0.0431551	0.233919	Up	3.50431	2.2776	2.12436	9.20323	8.7315	6.44907	RVE8		GO:0003677	DNA binding
283	TraesCS7A02G465500	235.692	110.129	361.255	3.28028	1.71382	0.0428402	0.232937	Up	1.90832	1.5864	1.48015	4.90118	6.33791	3.3538	GRDP2
284	TraesCS7D02G160100	749.259	350.085	1148.43	3.28044	1.71389	0.0210717	0.147958	Up	10.4387	11.7441	18.336	45.6837	62.3961	49.9548	IDS3		GO:0016491,GO:0055114	oxidoreductase activity|oxidation-reduction process
285	TraesCS1B02G053400	28.3906	13.2614	43.5198	3.28168	1.71444	0.0409904	0.226445	Up	0.0101881	0.222018	0.209361	0.449703	0.769944	0.73033	Os04g0620700		GO:0003676,GO:0003723,GO:0008270	nucleic acid binding|RNA binding|zinc ion binding
286	TraesCS4D02G361000	105.622	49.3359	161.909	3.28176	1.71447	0.0318714	0.193233	Up	1.38713	1.42259	1.27307	5.08287	4.49199	4.8538	At1g12200	Flavin-containing monooxygenase [Source:UniProtKB/TrEMBL;Acc:A0A1D5XX95]	GO:0055114,GO:0004499,GO:0050660,GO:0050661	oxidation-reduction process|N,N-dimethylaniline monooxygenase activity|flavin adenine dinucleotide binding|NADP binding
287	TraesCS6A02G285100	492.638	230.091	755.185	3.28211	1.71462	0.0408313	0.225878	Up	6.19604	4.54592	5.44084	19.8166	19.6433	11.7842	TMN12	Transmembrane 9 superfamily member [Source:UniProtKB/TrEMBL;Acc:A0A341WVU8]	GO:0016021	integral component of membrane
288	TraesCS5A02G076600	156.006	72.8274	239.185	3.28427	1.71557	0.0499417	0.255573	Up	2.14008	1.95755	2.32104	9.36461	8.31407	4.71974	Os01g0295700		GO:0046872,GO:0003824,GO:0004722,GO:0043169,GO:0006470	metal ion binding|catalytic activity|protein serine/threonine phosphatase activity|cation binding|protein dephosphorylation
289	TraesCS7A02G188200	53.2059	24.8334	81.5785	3.28503	1.71591	0.0230131	0.157296	Up	1.36499	0.46583	0.425353	2.41506	2.79134	4.42235	AAP6		GO:0016021	integral component of membrane
290	TraesCS6B02G289500	97.7708	45.6269	149.915	3.28567	1.71619	0.00935219	0.0864657	Up	0.213683	2.53453	3.13702	3.64105	7.26727	12.193	BRG1
291	TraesCS2D02G555000	1344.12	626.858	2061.38	3.28843	1.7174	0.0355568	0.207067	Up	23.8205	18.2953	15.4802	74.0731	64.4313	50.5194	OsI_17963	Anamorsin homolog [Source:UniProtKB/TrEMBL;Acc:A0A1D5UR98]	GO:0046872,GO:0005737,GO:0009055,GO:0051537,GO:0008168,GO:0051539,GO:0051536,GO:0016226,GO:0005758,GO:0005739,GO:0032259,GO:0022900	metal ion binding|cytoplasm|electron transfer activity|2 iron, 2 sulfur cluster binding|methyltransferase activity|4 iron, 4 sulfur cluster binding|iron-sulfur cluster binding|iron-sulfur cluster assembly|mitochondrial intermembrane space|mitochondrion|methylation|electron transport chain
292	TraesCS1B02G373100	143.985	67.1336	220.837	3.28952	1.71788	0.0438288	0.23604	Up	1.64797	2.52181	1.73412	8.82858	7.29997	5.1176	At1g74320				ko00564	Glycerophospholipid metabolism
293	TraesCS2A02G401400	230.396	107.394	353.398	3.29066	1.71838	0.0352228	0.205788	Up	6.34338	5.49065	3.94723	18.3248	18.8831	14.0642	At1g12760		GO:0016021	integral component of membrane
294	TraesCS2A02G331600	609.986	284.281	935.691	3.29142	1.71871	0.035321	0.206178	Up	16.7599	12.4464	8.08231	36.9192	45.4249	27.7102	RAB2A	Small GTP-binding protein [Source:UniProtKB/TrEMBL;Acc:Q5I5K7]	GO:0005525,GO:0003924	GTP binding|GTPase activity	ko04152	AMPK signaling pathway
295	TraesCS1B02G206000	371.025	172.837	569.213	3.29335	1.71956	0.0339367	0.200963	Up	4.68855	5.0468	4.46232	13.7506	15.8761	11.4121	CHY1		GO:0003860	3-hydroxyisobutyryl-CoA hydrolase activity	ko01200,ko00640,ko00410,ko00280	Carbon metabolism|Propanoate metabolism|beta-Alanine metabolism|Valine, leucine and isoleucine degradation
296	TraesCS4A02G135100	1327.56	618.385	2036.74	3.29364	1.71968	0.0415229	0.228367	Up	11.8061	10.5089	10.7496	35.7354	34.9383	19.6162	VSR1		GO:0016021,GO:0005509,GO:0016020	integral component of membrane|calcium ion binding|membrane
297	TraesCS7A02G410200	174.348	81.1696	267.527	3.29591	1.72068	0.0394319	0.221318	Up	4.95209	4.89556	4.08212	18.3682	16.8112	12.5056	RER1A	Protein RER1 [Source:UniProtKB/TrEMBL;Acc:A0A1D6SBT2]	GO:0016021,GO:0016020	integral component of membrane|membrane
298	TraesCS5D02G274400	139.564	64.9637	214.164	3.29667	1.72101	0.0492166	0.25338	Up	1.68416	1.72536	0.951365	5.72311	8.66326	3.04135			GO:0005515	protein binding
299	TraesCS3A02G416900	437.498	203.606	671.39	3.2975	1.72137	0.0371605	0.213061	Up	5.29912	3.45651	4.3587	15.8151	14.9949	10.0987	Os01g0911100		GO:0003676,GO:0005524,GO:0004386	nucleic acid binding|ATP binding|helicase activity	ko03040	Spliceosome
300	TraesCS1B02G104800	85.1375	39.6113	130.664	3.29864	1.72187	0.0359224	0.208311	Up	0	2.12741	2.30508	6.41894	5.16687	4.52649			GO:0005515	protein binding
301	TraesCS3B02G392100	81.4659	37.9001	125.032	3.29897	1.72202	0.0260662	0.171146	Up	1.52696	2.42113	2.31324	6.43308	7.31798	7.77602	ERG1
302	TraesCS3D02G494600	146.071	67.9407	224.202	3.29996	1.72245	0.00769887	0.0756505	Up	1.03308	1.33339	1.8781	1.90594	4.40189	8.49532	RR4		GO:0005622,GO:0000160,GO:0005634	intracellular|phosphorelay signal transduction system|nucleus	ko04075	Plant hormone signal transduction
303	TraesCS7D02G507900	580.488	269.996	890.98	3.29998	1.72246	0.0370773	0.212675	Up	7.81445	6.63127	7.61992	23.6445	29.271	15.0216	ACPEPP	Purple acid phosphatase [Source:UniProtKB/TrEMBL;Acc:W5I3D6]	GO:0046872,GO:0016787,GO:0003993	metal ion binding|hydrolase activity|acid phosphatase activity
304	TraesCS7A02G380600	252.826	117.593	388.06	3.30003	1.72248	0.034655	0.203681	Up	7.72366	7.6351	9.36306	23.2738	24.8734	17.8726	VPS32.1		GO:0007034	vacuolar transport	ko04144	Endocytosis
305	TraesCS1D02G081400	420.351	195.485	645.216	3.30058	1.72272	0.039715	0.222406	Up	5.36756	4.03896	3.9502	14.9297	15.3262	9.94724	PTI1		GO:0005524,GO:0004672,GO:0006468,GO:0004674	ATP binding|protein kinase activity|protein phosphorylation|protein serine/threonine kinase activity
306	TraesCS2A02G356300	653.163	303.65	1002.68	3.30208	1.72338	0.0430908	0.233739	Up	4.50122	4.23788	4.68387	16.7628	14.4697	8.30783	PDS5		GO:0007064	mitotic sister chromatid cohesion
307	TraesCS3B02G601800	1722.15	800.55	2643.75	3.30241	1.72352	0.015946	0.123401	Up	49.1448	36.8955	55.9914	137.75	190.776	153.803	MT2C		GO:0046872	metal ion binding
308	TraesCS1B02G187900	330.424	153.59	507.259	3.30269	1.72364	0.0439536	0.236439	Up	3.44047	3.36697	3.67712	12.854	13.2916	6.90961			GO:0003676	nucleic acid binding
309	TraesCS7A02G352500	129.149	60.0111	198.288	3.30419	1.7243	0.0394688	0.221414	Up	1.31073	1.45371	1.06112	5.46263	5.72516	3.25932	OFUT8
310	TraesCS7D02G011600	338.352	157.17	519.534	3.30556	1.7249	0.0371442	0.212982	Up	2.77494	2.73317	3.04767	10.3407	8.95658	6.66058	At3g13930	Acetyltransferase component of pyruvate dehydrogenase complex [Source:UniProtKB/TrEMBL;Acc:A0A1D6D186]	GO:0016746,GO:0005759,GO:0006090,GO:0004742,GO:0045254	transferase activity, transferring acyl groups|mitochondrial matrix|pyruvate metabolic process|dihydrolipoyllysine-residue acetyltransferase activity|pyruvate dehydrogenase complex	ko00020,ko01200,ko00620,ko00010	Citrate cycle (TCA cycle)|Carbon metabolism|Pyruvate metabolism|Glycolysis / Gluconeogenesis
311	TraesCS4D02G202200	586.071	272.176	899.967	3.30656	1.72533	0.0455444	0.241869	Up	2.52443	1.96805	2.61023	10.2192	8.34724	4.81281	ECA4		GO:0016021,GO:0000166,GO:0016787	integral component of membrane|nucleotide binding|hydrolase activity
312	TraesCS3B02G215900	172.926	80.2576	265.594	3.30927	1.72651	0.0469372	0.246312	Up	1.74459	1.30174	1.87449	6.63348	7.72532	3.5375	SPAC22A12.14c
313	TraesCS7B02G288800	451.799	209.585	694.013	3.31137	1.72743	0.0355923	0.207168	Up	6.46354	4.58111	5.8193	21.6719	22.2312	13.9679			GO:0009639,GO:0009959	response to red or far red light|negative gravitropism
314	TraesCS4D02G304600	172.196	79.8747	264.518	3.31167	1.72756	0.0327906	0.196825	Up	2.70934	2.35036	1.77686	6.54617	6.26095	6.43461	At5g64970		GO:0016021,GO:0022857,GO:0055085	integral component of membrane|transmembrane transporter activity|transmembrane transport
315	TraesCS2B02G514400	36.2366	16.8057	55.6674	3.3124	1.72788	0.0201265	0.143856	Up	0.0949355	0.400398	1.40989	1.46423	3.07549	3.95196	UGT88B1		GO:0016758	transferase activity, transferring hexosyl groups
316	TraesCS5B02G184700	911.126	422.515	1399.74	3.31287	1.72808	0.0332804	0.198562	Up	9.32464	8.96651	17.1691	38.2273	45.8104	27.3978	At2g25737		GO:0016021	integral component of membrane
317	TraesCS2A02G360300	138.844	64.3857	213.302	3.31287	1.72808	0.0438218	0.23604	Up	1.09699	0.857886	0.775935	2.97773	3.0802	2.0398	At5g63930		GO:0005524,GO:0004672,GO:0006468,GO:0005515,GO:0016021	ATP binding|protein kinase activity|protein phosphorylation|protein binding|integral component of membrane
318	TraesCS6D02G220300	41.8863	19.4184	64.3541	3.31407	1.7286	0.0414054	0.227925	Up	1.30163	0.275988	0.192939	1.13546	1.33379	2.28897	PVA12		GO:0016021,GO:0005789	integral component of membrane|endoplasmic reticulum membrane
319	TraesCS1B02G217500	138.965	64.3573	213.573	3.31855	1.73055	0.0420179	0.230135	Up	1.38179	1.81736	1.43998	5.52665	5.29344	3.2864	BSK1-2		GO:0005524,GO:0004672,GO:0006468,GO:0005515	ATP binding|protein kinase activity|protein phosphorylation|protein binding	ko04075	Plant hormone signal transduction
320	TraesCS1D02G259000	426.72	197.596	655.843	3.31911	1.7308	0.0303885	0.187678	Up	4.36402	2.87457	3.43605	12.8901	12.5223	9.22913	MED26B		GO:0005634	nucleus
321	TraesCS2A02G115400	266.583	123.428	409.737	3.31964	1.73103	0.0173642	0.130818	Up	5.22009	3.96163	4.14989	14.4068	15.0015	18.129	SRC2
322	TraesCS2D02G038300	57.3096	26.5206	88.0986	3.32189	1.732	0.0408974	0.226118	Up	0.537258	0.654597	1.32513	3.39646	3.1607	2.74283	At4g15970
323	TraesCS6A02G221700	316.714	146.552	486.877	3.32221	1.73214	0.0463695	0.244606	Up	1.58522	1.45695	1.73279	5.26159	6.3034	2.70969	UPF2		GO:0003723,GO:0000184,GO:0005515	RNA binding|nuclear-transcribed mRNA catabolic process, nonsense-mediated decay|protein binding	ko03015,ko03013	mRNA surveillance pathway|RNA transport
324	TraesCS7B02G465000	225.669	104.405	346.934	3.32297	1.73247	0.0424163	0.231465	Up	9.02259	6.46357	7.79643	33.1887	31.4832	17.1882	SPAC24H6.02c		GO:0008270	zinc ion binding
325	TraesCS3D02G241900	75.4148	34.8853	115.944	3.32359	1.73274	0.0187078	0.137167	Up	0.452853	0.950205	0.730453	1.40804	2.19765	2.78146	At2g42960		GO:0016021,GO:0005524,GO:0004672,GO:0004674,GO:0006468	integral component of membrane|ATP binding|protein kinase activity|protein serine/threonine kinase activity|protein phosphorylation
326	TraesCS3D02G162100	32.163	14.8772	49.4488	3.32381	1.73284	0.0376389	0.214789	Up	0.381794	0.851461	1.51298	2.87483	4.30456	4.0249			GO:0047617	acyl-CoA hydrolase activity
327	TraesCS7B02G177100	203.516	94.1173	312.915	3.32473	1.73324	0.0372188	0.213227	Up	3.66673	2.51621	3.76999	12.4412	9.42551	8.41175
328	TraesCS5B02G054700	45.115	20.86	69.37	3.3255	1.73357	0.0477662	0.24883	Up	0.409773	0.351104	0.625049	1.74575	1.25587	1.30138	DEGP14		GO:0005515	protein binding
329	TraesCS7A02G453600	1472.76	680.788	2264.73	3.32663	1.73406	0.0380644	0.21638	Up	44.1493	38.5953	33.4331	134.442	144.477	70.9275			GO:0005515	protein binding
330	TraesCS5A02G497400	744.068	343.812	1144.32	3.32834	1.7348	0.0357806	0.207842	Up	22.6017	14.3316	11.9478	55.5815	63.5345	38.0125	HIR1	Hypersensitive response protein [Source:UniProtKB/TrEMBL;Acc:A5HE90]
331	TraesCS6B02G377500	559.939	258.678	861.2	3.32923	1.73519	0.0371033	0.212793	Up	3.53101	1.91172	2.45651	9.70654	8.44587	6.08231	SIS8		GO:0005524,GO:0004672,GO:0006468,GO:0005515	ATP binding|protein kinase activity|protein phosphorylation|protein binding
332	TraesCS5A02G469200	209.123	96.5667	321.68	3.33117	1.73603	0.0466312	0.245395	Up	3.50769	2.2824	2.50379	9.26619	12.1602	5.18553	STY13		GO:0005524,GO:0004672,GO:0004674,GO:0006468	ATP binding|protein kinase activity|protein serine/threonine kinase activity|protein phosphorylation
333	TraesCS7B02G221700	209.286	96.5525	322.019	3.33517	1.73776	0.0298407	0.18583	Up	4.64878	3.28982	3.16515	11.7676	15.9893	10.8138			GO:0016021,GO:0016020,GO:0008375	integral component of membrane|membrane|acetylglucosaminyltransferase activity
334	TraesCS1B02G019100	498.414	229.899	766.929	3.33594	1.73809	0.039853	0.222761	Up	0.673076	14.9869	13.872	33.955	42.2504	18.3824	RABD1		GO:0005525,GO:0003924	GTP binding|GTPase activity
335	TraesCS1B02G441900	326.953	150.792	503.114	3.33648	1.73833	0.0471488	0.246968	Up	4.09828	3.16281	1.19683	8.89757	12.03	4.97676	ura7	CTP synthase [Source:UniProtKB/TrEMBL;Acc:W5A6G0]	GO:0005524,GO:0006541,GO:0006241,GO:0006221,GO:0003883,GO:0044210	ATP binding|glutamine metabolic process|CTP biosynthetic process|pyrimidine nucleotide biosynthetic process|CTP synthase activity|'de novo' CTP biosynthetic process	ko00240	Pyrimidine metabolism
336	TraesCS7B02G224800	131.417	60.6053	202.228	3.3368	1.73847	0.0391621	0.220295	Up	7.18531	3.38678	2.99179	16.946	17.6405	12.6587
337	TraesCS2D02G396500	254.267	117.218	391.317	3.33838	1.73915	0.0384122	0.21753	Up	2.48329	1.23997	1.33594	6.30211	6.87249	4.16272	SBT1.3		GO:0046872,GO:0030001,GO:0006801	metal ion binding|metal ion transport|superoxide metabolic process
338	TraesCS3A02G103000	395.658	182.288	609.028	3.34103	1.74029	0.0321657	0.194385	Up	4.19705	3.87473	6.41188	14.5089	17.5877	11.5523	HIP1
339	TraesCS5B02G057800	274.557	126.442	422.672	3.34281	1.74106	0.0230624	0.157518	Up	9.25129	7.64251	7.28907	22.6442	26.6687	24.9262	GSTZ1		GO:0005737,GO:0003824,GO:0009072,GO:0005515	cytoplasm|catalytic activity|aromatic amino acid family metabolic process|protein binding	ko00350,ko00643	Tyrosine metabolism|Styrene degradation
340	TraesCS3B02G158500	381.674	175.725	587.623	3.34398	1.74157	0.0475342	0.248232	Up	3.66692	3.20299	8.97071	18.3295	33.3983	10.5759	GLCAT14A		GO:0016020,GO:0008375	membrane|acetylglucosaminyltransferase activity
341	TraesCS6D02G228800	303.447	139.659	467.236	3.34555	1.74224	0.0278718	0.178267	Up	10.6225	5.37912	6.22869	24.4392	21.9773	21.7054	GPX6	Glutathione peroxidase [Source:UniProtKB/TrEMBL;Acc:A0A341XVY3]	GO:0006979,GO:0055114,GO:0004602	response to oxidative stress|oxidation-reduction process|glutathione peroxidase activity	ko00480,ko00590	Glutathione metabolism|Arachidonic acid metabolism
342	TraesCS6A02G327900	24.9681	11.4898	38.4464	3.34614	1.7425	0.0341222	0.20163	Up	0.545595	0	0.25162	1.13267	2.58251	3.56025
343	TraesCS2D02G493700	310.704	142.956	478.452	3.34684	1.7428	0.0203354	0.144845	Up	8.79608	4.06669	2.55045	12.6317	16.3886	17.6901			GO:0005524,GO:0004672,GO:0006468,GO:0004674,GO:0000166,GO:0016301,GO:0016310	ATP binding|protein kinase activity|protein phosphorylation|protein serine/threonine kinase activity|nucleotide binding|kinase activity|phosphorylation	ko04075	Plant hormone signal transduction
344	TraesCS5A02G409800	311.399	143.266	479.532	3.34716	1.74294	0.0476525	0.248704	Up	4.15883	3.265	3.10628	12.309	11.8271	5.69376	CIGR2
345	TraesCS6B02G299500	56.4919	25.9883	86.9956	3.34749	1.74308	0.0425257	0.231793	Up	2.66926	0.778455	1.008	4.30537	4.69165	4.87989	LPPE2		GO:0016021	integral component of membrane
346	TraesCS5B02G427700	105.148	48.3674	161.929	3.34789	1.74325	0.0453685	0.241312	Up	3.07131	2.55086	3.3347	12.3693	12.2567	7.14173
347	TraesCS5A02G355100	112.472	51.7183	173.227	3.34943	1.74392	0.0372296	0.21327	Up	4.76145	3.08856	3.40581	13.8222	13.4864	10.6283
348	TraesCS7A02G328600	47.5198	21.8502	73.1893	3.34959	1.74398	0.0429468	0.233272	Up	1.6883	1.57695	0.166318	3.95751	2.89815	4.31987	CFIS1		GO:0005849,GO:0006378,GO:0003729	mRNA cleavage factor complex|mRNA polyadenylation|mRNA binding	ko03015	mRNA surveillance pathway
349	TraesCS2B02G053600	459.57	211.293	707.848	3.35008	1.7442	0.0386559	0.218445	Up	4.92204	4.02297	6.26823	15.3861	16.3844	8.25749	At4g26910		GO:0016746,GO:0006099,GO:0004149,GO:0045252	transferase activity, transferring acyl groups|tricarboxylic acid cycle|dihydrolipoyllysine-residue succinyltransferase activity|oxoglutarate dehydrogenase complex	ko00020,ko01200,ko00310	Citrate cycle (TCA cycle)|Carbon metabolism|Lysine degradation
350	TraesCS3A02G118900	443.962	204.112	683.813	3.35019	1.74424	0.0483664	0.25074	Up	1.57833	1.34634	1.40915	4.95615	5.43046	2.07691
351	TraesCS7D02G224700	121.893	56.0237	187.762	3.35148	1.7448	0.0373016	0.213441	Up	2.7233	2.21763	1.72493	7.97006	7.86522	5.68624	IBR5		GO:0008138,GO:0004725,GO:0016791,GO:0016311,GO:0006470	protein tyrosine/serine/threonine phosphatase activity|protein tyrosine phosphatase activity|phosphatase activity|dephosphorylation|protein dephosphorylation	ko04010	MAPK signaling pathway
352	TraesCS4A02G089700	94.879	43.5872	146.171	3.35353	1.74568	0.042574	0.231979	Up	1.27725	1.19865	1.09986	3.76377	3.40865	2.803	CRPK1		GO:0005524,GO:0004672,GO:0006468	ATP binding|protein kinase activity|protein phosphorylation
353	TraesCS5A02G266400	180.605	82.9686	278.241	3.35356	1.74569	0.0450003	0.240023	Up	2.53927	2.56365	2.17335	8.30576	8.18512	4.3179	EML3		GO:0050832	defense response to fungus
354	TraesCS4B02G032200	137.784	63.2857	212.282	3.35434	1.74603	0.037245	0.21327	Up	6.72427	4.52801	3.65886	23.2761	19.8864	14.5615
355	TraesCS7A02G381300	682.613	313.37	1051.86	3.35659	1.747	0.0409723	0.226376	Up	10.0886	8.5368	6.44016	27.8765	24.1391	14.8166	RGLG2
356	TraesCS1D02G114300	83.093	38.1286	128.057	3.35856	1.74784	0.0401657	0.223779	Up	2.00339	1.20323	0.794199	4.06259	4.42665	3.45303	ATG18D		GO:0005515	protein binding
357	TraesCS7D02G323000	170.189	78.0891	262.289	3.35884	1.74796	0.0300052	0.186289	Up	2.05388	2.26863	2.3463	5.78169	9.17595	5.54857	PAT08	S-acyltransferase [Source:UniProtKB/TrEMBL;Acc:A0A1D6CTA0]	GO:0016021,GO:0019706	integral component of membrane|protein-cysteine S-palmitoyltransferase activity	ko04391	Hippo signaling pathway - fly
358	TraesCS1D02G265100	306.722	140.733	472.711	3.35893	1.748	0.0405216	0.224971	Up	5.00481	4.28093	4.78001	17.4937	14.7826	10.5234	SKP2A		GO:0005515	protein binding	ko04110,ko04120,ko04068,ko04150	Cell cycle|Ubiquitin mediated proteolysis|FoxO signaling pathway|mTOR signaling pathway
359	TraesCS7B02G175200	306.842	140.729	472.955	3.36074	1.74878	0.0282803	0.179846	Up	8.61268	4.11155	3.56612	13.3694	36.9053	15.6844	CYP89A9		GO:0020037,GO:0005506,GO:0016705,GO:0055114	heme binding|iron ion binding|oxidoreductase activity, acting on paired donors, with incorporation or reduction of molecular oxygen|oxidation-reduction process
360	TraesCS2D02G452500	156.427	71.7334	241.121	3.36135	1.74904	0.0125419	0.105159	Up	7.13422	8.16255	5.23023	13.6864	28.804	33.2321			GO:0004857,GO:0043086	enzyme inhibitor activity|negative regulation of catalytic activity
361	TraesCS2D02G388400	545.554	250.175	840.932	3.36137	1.74905	0.0393619	0.221046	Up	3.23996	3.14316	3.37513	14.4081	11.431	6.99968	LIF2		GO:0003676,GO:0003723	nucleic acid binding|RNA binding
362	TraesCS2B02G338600	121.993	55.9271	188.06	3.36259	1.74957	0.015767	0.122442	Up	3.06968	2.38236	1.38852	4.04065	12.0362	10.0369	MST1		GO:0016021,GO:0022857,GO:0016020,GO:0055085,GO:0005215	integral component of membrane|transmembrane transporter activity|membrane|transmembrane transport|transporter activity
363	TraesCS2D02G063000	478.949	219.552	738.346	3.36297	1.74974	0.0302823	0.18724	Up	23.3877	11.2198	9.89761	53.9975	64.9686	40.4987	HIPP27		GO:0046872,GO:0030001	metal ion binding|metal ion transport
364	TraesCS4A02G091300	1533.39	702.666	2364.12	3.36449	1.75039	0.0352819	0.206051	Up	19.2933	16.7781	13.3465	68.9308	52.3505	38.8965	SR45A		GO:0003676,GO:0003723,GO:0043484,GO:0009644	nucleic acid binding|RNA binding|regulation of RNA splicing|response to high light intensity
365	TraesCS6A02G346200	133.409	61.1085	205.709	3.36629	1.75116	0.0364472	0.210316	Up	1.57113	1.27364	1.97911	5.06879	7.34315	3.63227	YOR059C
366	TraesCS7A02G177900	259.689	118.938	400.44	3.36681	1.75138	0.0291752	0.183109	Up	2.51846	2.35116	2.64707	9.82129	8.31111	8.07319	PABN3		GO:0003676,GO:0003723	nucleic acid binding|RNA binding	ko03015	mRNA surveillance pathway
367	TraesCS3D02G375800	365.103	167.21	562.997	3.36701	1.75147	0.0079326	0.0771521	Up	3.8614	5.22215	6.37069	8.70901	25.1023	29.6242	NPF5.10		GO:0022857,GO:0016020,GO:0055085	transmembrane transporter activity|membrane|transmembrane transport
368	TraesCS5B02G494300	156.69	71.7595	241.62	3.36708	1.7515	0.0480421	0.249583	Up	0.825953	0.602166	0.888632	3.08093	2.66832	1.49569	RGA5		GO:0005524,GO:0004672,GO:0043531,GO:0006468	ATP binding|protein kinase activity|ADP binding|protein phosphorylation
369	TraesCS2B02G341400	306.169	140.217	472.121	3.36708	1.7515	0.0376828	0.214916	Up	3.789	3.84022	7.38653	17.8286	28.4551	9.94074	ARB_05372	Aldose 1-epimerase [Source:UniProtKB/TrEMBL;Acc:A0A1D5U2W1]	GO:0005975,GO:0030246,GO:0003824,GO:0016853,GO:0019318,GO:0004034	carbohydrate metabolic process|carbohydrate binding|catalytic activity|isomerase activity|hexose metabolic process|aldose 1-epimerase activity	ko00052,ko00010	Galactose metabolism|Glycolysis / Gluconeogenesis
370	TraesCS1B02G294600	231.117	105.84	356.393	3.36728	1.75158	0.0257405	0.169828	Up	2.53769	1.59778	1.97994	6.38866	8.56511	6.58196	RIBA3		GO:0009507,GO:0003935,GO:0008686,GO:0009231	chloroplast|GTP cyclohydrolase II activity|3,4-dihydroxy-2-butanone-4-phosphate synthase activity|riboflavin biosynthetic process	ko00740	Riboflavin metabolism
371	TraesCS5A02G166000	225.237	103.138	347.336	3.36768	1.75175	0.0390595	0.21981	Up	4.67406	3.87763	4.1527	14.2273	16.2785	8.79691	ppk13		GO:0005524,GO:0004672,GO:0006468	ATP binding|protein kinase activity|protein phosphorylation
372	TraesCS2A02G182500	54.6291	24.9966	84.2616	3.37092	1.75314	0.0253642	0.16808	Up	1.15021	0.503943	0.798432	1.25249	4.44436	3.34902	At5g39410		GO:0016021,GO:0016491,GO:0055114	integral component of membrane|oxidoreductase activity|oxidation-reduction process
373	TraesCS1A02G264900	186.396	85.2568	287.534	3.37257	1.75385	0.0442254	0.237407	Up	4.41992	3.41936	2.12016	12.7158	9.56517	5.90708	SKP2A		GO:0005515	protein binding	ko04110,ko04120,ko04068,ko04150	Cell cycle|Ubiquitin mediated proteolysis|FoxO signaling pathway|mTOR signaling pathway
374	TraesCS6A02G150000	36.887	16.8659	56.908	3.37414	1.75452	0.0212725	0.148944	Up	0.541018	0.316379	0.453104	0.682821	1.71427	2.58531	CER3		GO:0016021,GO:0016491,GO:0005506,GO:0055114,GO:0008610,GO:0046184,GO:0043447,GO:0010025	integral component of membrane|oxidoreductase activity|iron ion binding|oxidation-reduction process|lipid biosynthetic process|aldehyde biosynthetic process|alkane biosynthetic process|wax biosynthetic process
375	TraesCS2A02G300100	270.552	123.68	417.423	3.37502	1.7549	0.0385686	0.218167	Up	1.52801	1.28033	1.63745	5.63139	5.15451	3.31183	SEC5B		GO:0000145,GO:0006893	exocyst|Golgi to plasma membrane transport	ko04014	Ras signaling pathway
376	TraesCS3D02G474500	771.204	352.544	1189.86	3.37508	1.75492	0.0311791	0.190623	Up	68.9757	55.1729	76.3813	297.886	301.465	163.776
377	TraesCS4B02G057100	235.1	107.472	362.728	3.37509	1.75492	0.0435395	0.235238	Up	3.55592	1.94681	1.64673	8.199	8.72653	4.48468			GO:0016021	integral component of membrane
378	TraesCS2D02G383200	47.8695	21.8571	73.8818	3.38022	1.75712	0.0303537	0.187563	Up	2.35702	1.6206	2.44887	7.7737	6.29186	9.53363	SAUR36		GO:0009733	response to auxin	ko04075	Plant hormone signal transduction
379	TraesCS3D02G457400	327.312	149.432	505.191	3.38073	1.75734	0.0298648	0.185893	Up	5.3628	3.06873	2.76659	12.1256	13.7654	9.7253	RLCK185		GO:0005524,GO:0004672,GO:0006468	ATP binding|protein kinase activity|protein phosphorylation
380	TraesCS7B02G393600	205.071	93.5826	316.559	3.38267	1.75816	0.025168	0.167139	Up	10.5103	8.44203	7.39384	36.2601	38.0135	30.9715	dph3
381	TraesCS1B02G107100	176.639	80.6067	272.671	3.38273	1.75819	0.0255445	0.168967	Up	0.117242	2.94774	2.48141	5.39354	7.14049	5.06768	XBOS34		GO:0005515	protein binding
382	TraesCS3B02G264900	155.176	70.7827	239.569	3.38457	1.75897	0.0389246	0.21939	Up	2.92097	2.15226	1.77322	8.05076	9.66713	5.35558	At1g28600		GO:0016788	hydrolase activity, acting on ester bonds
383	TraesCS3D02G267000	130.461	59.4949	201.428	3.38563	1.75943	0.0386943	0.218615	Up	2.31218	1.52587	1.39852	5.425	7.26955	4.09	WSD1		GO:0004144,GO:0045017	diacylglycerol O-acyltransferase activity|glycerolipid biosynthetic process
384	TraesCS1A02G259000	149.117	67.9918	230.243	3.38634	1.75972	0.019996	0.143217	Up	2.37735	2.80822	4.84069	9.41696	11.7733	11.8646	IPI1		GO:0016787,GO:0008299,GO:0004452	hydrolase activity|isoprenoid biosynthetic process|isopentenyl-diphosphate delta-isomerase activity	ko00900	Terpenoid backbone biosynthesis
385	TraesCS7D02G365000	122.33	55.7441	188.916	3.38899	1.76086	0.046113	0.243815	Up	2.6806	1.93505	1.98266	8.65124	11.2851	4.34932	At1g29670		GO:0016788	hydrolase activity, acting on ester bonds
386	TraesCS3A02G337100	447.386	203.773	690.999	3.39102	1.76172	0.0253505	0.168017	Up	10.6805	9.63035	12.1041	42.6928	38.4114	31.93	RER3		GO:0016021	integral component of membrane
387	TraesCS4D02G096400	141.011	64.2163	217.807	3.39176	1.76204	0.032829	0.196923	Up	1.53699	1.24532	1.44228	5.71413	5.0925	3.90935	PAD4		GO:0005737,GO:0005634,GO:0016787,GO:0006629,GO:0010105,GO:0010150,GO:0031348,GO:2000022,GO:0010310,GO:0009862,GO:0009625,GO:0080142,GO:0002213,GO:1900426,GO:0010225,GO:0009816,GO:0001666,GO:0010618,GO:0010942,GO:0050829,GO:0060866,GO:0071327,GO:0080151,GO:1900367,GO:1901183	cytoplasm|nucleus|hydrolase activity|lipid metabolic process|negative regulation of ethylene-activated signaling pathway|leaf senescence|negative regulation of defense response|regulation of jasmonic acid mediated signaling pathway|regulation of hydrogen peroxide metabolic process|systemic acquired resistance, salicylic acid mediated signaling pathway|response to insect|regulation of salicylic ac…
388	TraesCS1A02G418300	265.122	120.691	409.553	3.39339	1.76273	0.0190116	0.138697	Up	2.78626	2.89631	3.77875	9.88813	11.3262	11.0073	At1g19450		GO:0016021,GO:0022857,GO:0016020,GO:0055085,GO:0005215	integral component of membrane|transmembrane transporter activity|membrane|transmembrane transport|transporter activity
389	TraesCS5B02G078700	49.2934	22.4367	76.15	3.39399	1.76298	0.0354155	0.206429	Up	0.649666	0.488154	0.483918	1.98872	1.91841	2.27388	NRAMP6		GO:0016021,GO:0030001,GO:0016020,GO:0046873	integral component of membrane|metal ion transport|membrane|metal ion transmembrane transporter activity	ko04142	Lysosome
390	TraesCS4A02G049700	84.4071	38.4118	130.402	3.39485	1.76335	0.0464883	0.244976	Up	1.26726	0.892159	0.824494	3.40093	3.32252	2.22737			GO:0016021,GO:0016020,GO:0048193,GO:0016192	integral component of membrane|membrane|Golgi vesicle transport|vesicle-mediated transport
391	TraesCS5B02G015700	76.8112	34.9515	118.671	3.3953	1.76354	0.0280979	0.179098	Up	0.798491	2.41744	5.54032	20.1582	11.5602	18.3103	tlp
392	TraesCS7D02G359100	140.199	63.7895	216.609	3.39568	1.7637	0.0210026	0.14768	Up	2.63529	1.88549	1.58119	5.09678	7.12334	7.14885
393	TraesCS1A02G250500	15.2341	6.92994	23.5383	3.39662	1.7641	0.0457903	0.242749	Up	0.923715	0.710006	0.0636683	1.12404	1.87751	3.74073	PM19L		GO:0016021	integral component of membrane
394	TraesCS3B02G431600	139.347	63.386	215.307	3.39677	1.76416	0.031184	0.190638	Up	0.718863	2.57342	2.74088	6.52414	6.29501	5.2292
395	TraesCS6A02G242900	292.851	133.196	452.506	3.39731	1.76439	0.0418686	0.229569	Up	1.934	1.43134	1.66388	6.72531	4.89536	3.38907	OsI_021818		GO:0006352,GO:0005669	DNA-templated transcription, initiation|transcription factor TFIID complex	ko03022	Basal transcription factors
396	TraesCS7B02G270000	423.55	192.624	654.476	3.39768	1.76455	0.0307616	0.189225	Up	7.64152	7.65053	8.03392	24.3632	37.2373	17.952	At1g29670		GO:0016788	hydrolase activity, acting on ester bonds
397	TraesCS5D02G322800	282.074	128.277	435.87	3.39789	1.76464	0.0431213	0.233847	Up	2.96081	2.55998	2.31827	10.0524	11.2588	5.03889	GYP7
398	TraesCS7A02G319500	315.988	143.637	488.338	3.39982	1.76546	0.0364979	0.210542	Up	2.43094	2.31906	2.50975	9.494	8.45964	5.09451	At1g09600		GO:0005524,GO:0004672,GO:0006468	ATP binding|protein kinase activity|protein phosphorylation
399	TraesCS7D02G381900	61.7862	28.0581	95.5144	3.40417	1.7673	0.0374025	0.213847	Up	0.636975	1.07148	0.375596	3.51025	4.08277	2.40012	PBL19		GO:0005524,GO:0004672,GO:0006468,GO:0004674	ATP binding|protein kinase activity|protein phosphorylation|protein serine/threonine kinase activity
400	TraesCS4B02G044300	129.872	58.9704	200.774	3.40467	1.76751	0.0240757	0.161899	Up	4.48105	4.18095	3.40351	8.16069	19.2332	13.655			GO:0016021	integral component of membrane	ko00982,ko00480,ko00980	Drug metabolism - cytochrome P450|Glutathione metabolism|Metabolism of xenobiotics by cytochrome P450
401	TraesCS5B02G138700	344.764	156.529	532.999	3.40511	1.7677	0.0141492	0.113943	Up	4.70918	2.72587	1.09158	7.60521	8.37773	12.569	ASD1		GO:0046373,GO:0046556	L-arabinose metabolic process|alpha-L-arabinofuranosidase activity	ko00520	Amino sugar and nucleotide sugar metabolism
402	TraesCS5A02G073800	1025.31	465.005	1585.61	3.40988	1.76972	0.0339881	0.201134	Up	49.918	34.878	47.6527	174.88	165.052	92.7737	RPL40B		GO:0005515	protein binding	ko03010	Ribosome
403	TraesCS1B02G146700	76.0766	34.5001	117.653	3.41023	1.76987	0.0394475	0.221356	Up	0.280575	1.0904	1.789	3.59651	4.30483	2.19155
404	TraesCS5A02G166200	121.878	55.247	188.51	3.41213	1.77067	0.0382317	0.216935	Up	0.671036	1.00806	0.983842	2.45494	3.68325	1.76893	At1g78280		GO:0005515	protein binding
405	TraesCS3D02G188900	99.9808	45.3066	154.655	3.41352	1.77126	0.0140642	0.113583	Up	1.0017	0.609408	0.753727	2.07757	3.64747	4.15389	agdD		GO:0004553,GO:0005975,GO:0030246,GO:0003824	hydrolase activity, hydrolyzing O-glycosyl compounds|carbohydrate metabolic process|carbohydrate binding|catalytic activity
406	TraesCS7B02G277400	35.4838	16.074	54.8936	3.41506	1.77191	0.0406763	0.225384	Up	0.657681	0.655744	0.351169	1.45061	2.76172	1.58778	At3g47200		GO:0016021	integral component of membrane
407	TraesCS6A02G266700	143.456	64.9597	221.953	3.41678	1.77264	0.0418884	0.229601	Up	2.01521	1.73632	1.62164	6.01242	10.7773	3.71546	4CL2		GO:0003824,GO:0016207,GO:0010584	catalytic activity|4-coumarate-CoA ligase activity|pollen exine formation	ko00940,ko00130,ko00360	Phenylpropanoid biosynthesis|Ubiquinone and other terpenoid-quinone biosynthesis|Phenylalanine metabolism
408	TraesCS5D02G137000	35.4274	16.0371	54.8177	3.41819	1.77323	0.0361375	0.209156	Up	0.0856	0.44678	1.18438	2.2732	2.09839	2.32253	CYP94C1		GO:0020037,GO:0005506,GO:0016705,GO:0055114	heme binding|iron ion binding|oxidoreductase activity, acting on paired donors, with incorporation or reduction of molecular oxygen|oxidation-reduction process
409	TraesCS3B02G536200	136.385	61.6968	211.073	3.42114	1.77448	0.00988486	0.0894424	Up	5.29712	3.42697	4.11956	9.93808	21.0718	26.2238	CML15		GO:0005509	calcium ion binding
410	TraesCS3A02G024100	66.9547	30.2879	103.622	3.42121	1.77451	0.0294904	0.184423	Up	0.109985	1.46856	0.915292	2.1229	2.76259	2.3658	Ot07g01880		GO:0003676,GO:0005524,GO:0000166,GO:0004813,GO:0006419,GO:0004812,GO:0043039	nucleic acid binding|ATP binding|nucleotide binding|alanine-tRNA ligase activity|alanyl-tRNA aminoacylation|aminoacyl-tRNA ligase activity|tRNA aminoacylation
411	TraesCS6B02G214600	182.315	82.4707	282.159	3.42132	1.77455	0.0363212	0.209878	Up	6.17712	5.51334	5.74596	21.5525	37.4972	14.4626	Os02g0219900	CASP-like protein [Source:UniProtKB/TrEMBL;Acc:A0A341X7R5]
412	TraesCS6D02G320600	81.7977	36.9984	126.597	3.42169	1.77471	0.0399036	0.22283	Up	0.927347	0.679555	1.61699	4.5247	3.40237	2.95664	GSVIVT00026920001		GO:0005975,GO:0016021,GO:0005576,GO:0004650,GO:0071555	carbohydrate metabolic process|integral component of membrane|extracellular region|polygalacturonase activity|cell wall organization
413	TraesCS6B02G399500	152.688	69.0371	236.338	3.42335	1.77541	0.0464632	0.244914	Up	2.689	2.554	2.9314	9.55346	10.2787	4.77606	RLF		GO:0046872,GO:0020037	metal ion binding|heme binding
414	TraesCS1D02G109600	694.384	313.9	1074.87	3.42424	1.77578	0.0277534	0.177737	Up	9.11029	6.50884	10.8586	36.6306	29.1763	24.3451	FLBR	Dihydrolipoyl dehydrogenase [Source:UniProtKB/TrEMBL;Acc:W5A874]	GO:0016491,GO:0009055,GO:0045454,GO:0055114,GO:0050660,GO:0004148,GO:0005623,GO:0016668,GO:0000166,GO:0022900	oxidoreductase activity|electron transfer activity|cell redox homeostasis|oxidation-reduction process|flavin adenine dinucleotide binding|dihydrolipoyl dehydrogenase activity|cell|oxidoreductase activity, acting on a sulfur group of donors, NAD(P) as acceptor|nucleotide binding|electron transport chain	ko00260,ko01200,ko00630,ko00620,ko00020,ko00280,ko00640,ko00010	Glycine, serine and threonine metabolism|Carbon metabolism|Glyoxylate and dicarboxylate metabolism|Pyruvate metabolism|Citrate cycle (TCA cycle)|Valine, leucine and isoleucine degradation|Propanoate metabolism|Glycolysis / Gluconeogenesis
415	TraesCS3B02G208300	221.103	99.9098	342.295	3.42605	1.77654	0.0397676	0.222576	Up	2.56863	1.84765	1.44778	5.88899	7.90512	3.61655	NAC074		GO:0016021,GO:0005634,GO:0003677,GO:0006355,GO:0016020	integral component of membrane|nucleus|DNA binding|regulation of transcription, DNA-templated|membrane
416	TraesCS2B02G183700	404.786	182.887	626.685	3.42663	1.77679	0.0392879	0.22077	Up	7.3245	4.19659	6.11882	18.8789	22.5624	10.3625			GO:0016021	integral component of membrane
417	TraesCS7B02G190300	121.168	54.7019	187.634	3.43011	1.77825	0.0314165	0.191475	Up	1.49847	0.738515	1.09693	3.54623	4.83506	3.04156	ACX2	Acyl-coenzyme A oxidase [Source:UniProtKB/TrEMBL;Acc:A0A1D6CHU0]	GO:0071949,GO:0055114,GO:0006631,GO:0016627,GO:0003997,GO:0005777,GO:0006635	FAD binding|oxidation-reduction process|fatty acid metabolic process|oxidoreductase activity, acting on the CH-CH group of donors|acyl-CoA oxidase activity|peroxisome|fatty acid beta-oxidation	ko04024,ko00592,ko00071,ko04146,ko01040,ko01212	cAMP signaling pathway|alpha-Linolenic acid metabolism|Fatty acid degradation|Peroxisome|Biosynthesis of unsaturated fatty acids|Fatty acid metabolism
418	TraesCS7A02G162000	385.182	173.893	596.472	3.43011	1.77826	0.0408764	0.226035	Up	5.95302	4.10965	3.38706	16.9144	16.6466	7.88961	CID7
419	TraesCS3B02G322100	116.614	52.638	180.589	3.43078	1.77854	0.0126374	0.105678	Up	2.25885	4.53465	2.56819	10.0841	7.62969	15.2338	At1g17710		GO:0016791	phosphatase activity	ko00564	Glycerophospholipid metabolism
420	TraesCS3B02G251100	181.786	82.0368	281.535	3.43181	1.77897	0.0409477	0.226303	Up	2.24624	1.69361	4.44369	14.7988	9.78447	8.34565	AT5		GO:0016747	transferase activity, transferring acyl groups other than amino-acyl groups
421	TraesCS7D02G004100	388.804	175.441	602.168	3.43231	1.77918	0.0204124	0.145135	Up	4.37808	3.6549	4.3407	12.3317	19.3471	13.4573	HGO		GO:0055114,GO:0006559,GO:0004411,GO:0006570,GO:0005829,GO:1902000,GO:0006572	oxidation-reduction process|L-phenylalanine catabolic process|homogentisate 1,2-dioxygenase activity|tyrosine metabolic process|cytosol|homogentisate catabolic process|tyrosine catabolic process	ko00350,ko00643	Tyrosine metabolism|Styrene degradation
422	TraesCS7D02G014900	225.572	101.774	349.369	3.43278	1.77938	0.0267851	0.173744	Up	2.77443	3.26123	1.89893	7.92535	10.4284	7.17508	RVE8		GO:0005634,GO:0003677	nucleus|DNA binding
423	TraesCS1A02G209400	103.681	46.7705	160.592	3.43362	1.77973	0.0259076	0.170485	Up	1.70505	1.15728	0.948125	4.27888	6.63998	4.53726	SCL6
424	TraesCS5A02G251600	36.1426	16.3035	55.9817	3.43372	1.77977	0.047455	0.247964	Up	0.228441	0.431771	0.375168	1.18813	1.0638	1.08548	OFUT34		GO:0016021,GO:0016757,GO:0006004	integral component of membrane|transferase activity, transferring glycosyl groups|fucose metabolic process
425	TraesCS5A02G014300	549.546	247.877	851.214	3.43401	1.7799	0.0240856	0.16192	Up	10.5722	9.8079	10.3055	33.5652	41.1065	29.5426	Os12g0632700	Malate dehydrogenase [Source:UniProtKB/TrEMBL;Acc:A0A1D5YVJ9]	GO:0005975,GO:0016491,GO:0003824,GO:0055114,GO:0006099,GO:0016616,GO:0006108,GO:0030060,GO:0019752,GO:0016615	carbohydrate metabolic process|oxidoreductase activity|catalytic activity|oxidation-reduction process|tricarboxylic acid cycle|oxidoreductase activity, acting on the CH-OH group of donors, NAD or NADP as acceptor|malate metabolic process|L-malate dehydrogenase activity|carboxylic acid metabolic process|malate dehydrogenase activity	ko00710,ko01200,ko00630,ko00620,ko00020,ko00270	Carbon fixation in photosynthetic organisms|Carbon metabolism|Glyoxylate and dicarboxylate metabolism|Pyruvate metabolism|Citrate cycle (TCA cycle)|Cysteine and methionine metabolism
426	TraesCS7A02G327700	80.9203	36.4715	125.369	3.43745	1.78134	0.0364264	0.210266	Up	0.991794	0.647128	0.505305	2.79593	2.92392	2.01955	SWC2		GO:0005634,GO:0006355,GO:0006338,GO:0043486	nucleus|regulation of transcription, DNA-templated|chromatin remodeling|histone exchange
427	TraesCS7D02G277500	346.027	155.937	536.117	3.43804	1.78159	0.0335163	0.199319	Up	6.54371	4.31357	2.68635	14.0054	22.1647	9.8293	MDAR4		GO:0016491,GO:0055114,GO:0050660	oxidoreductase activity|oxidation-reduction process|flavin adenine dinucleotide binding	ko00053	Ascorbate and aldarate metabolism
428	TraesCS3A02G201100	308.066	138.785	477.347	3.43946	1.78218	0.0225175	0.155065	Up	11.7572	7.34816	8.25398	24.3841	37.2093	26.3708	VHA-F	V-type proton ATPase subunit F [Source:UniProtKB/TrEMBL;Acc:B2B9T8]	GO:0015991,GO:0033180,GO:0046961,GO:0006811,GO:1902600,GO:0034220	GO_0015991|proton-transporting V-type ATPase, V1 domain|proton-transporting ATPase activity, rotational mechanism|ion transport|proton transmembrane transport|ion transmembrane transport	ko04145,ko00190,ko04150	Phagosome|Oxidative phosphorylation|mTOR signaling pathway
429	TraesCS4D02G181300	321.395	144.772	498.018	3.44001	1.78241	0.023103	0.157714	Up	9.15643	6.70564	7.49116	31.0934	34.3924	24.4844	NIFU1		GO:0005506,GO:0009507,GO:0051536,GO:0016226	iron ion binding|chloroplast|iron-sulfur cluster binding|iron-sulfur cluster assembly
430	TraesCS4A02G262700	748.149	336.984	1159.31	3.44026	1.78252	0.0300413	0.186436	Up	10.5368	8.24696	7.59222	27.7639	40.7977	18.9593	NPF8.3		GO:0016021,GO:0006857,GO:0022857,GO:0016020,GO:0055085,GO:0005215	integral component of membrane|oligopeptide transport|transmembrane transporter activity|membrane|transmembrane transport|transporter activity
431	TraesCS7D02G457800	113.715	51.2186	176.212	3.44039	1.78257	0.0275931	0.177042	Up	0.908857	0.826463	0.33419	2.98423	2.17678	2.32113	MCSU3	Molybdenum cofactor sulfurase [Source:UniProtKB/TrEMBL;Acc:A0A1D6CLD6]	GO:0030170,GO:0003824,GO:0016829,GO:0030151,GO:0006777,GO:0008265,GO:0102867	pyridoxal phosphate binding|catalytic activity|lyase activity|molybdenum ion binding|Mo-molybdopterin cofactor biosynthetic process|Mo-molybdopterin cofactor sulfurase activity|molybdenum cofactor sulfurtransferase activity
432	TraesCS7B02G312600	19.7228	8.88232	30.5633	3.44092	1.78279	0.0376854	0.214916	Up	0.436798	0.149545	0.296204	0.501766	1.36584	1.59008	NPF8.3		GO:0016021,GO:0022857,GO:0016020,GO:0055085	integral component of membrane|transmembrane transporter activity|membrane|transmembrane transport
433	TraesCS3D02G315100	92.1113	41.4818	142.741	3.44105	1.78285	0.0428773	0.233086	Up	2.93139	1.94237	1.61366	10.0656	13.3541	6.09655
434	TraesCS3D02G536600	865.435	389.715	1341.16	3.44138	1.78299	0.00682725	0.0699071	Up	25.0824	23.688	49.1967	64.1331	93.9541	158.708	MT2C		GO:0046872	metal ion binding
435	TraesCS2B02G371400	95.1605	42.8488	147.472	3.44169	1.78312	0.0346724	0.203739	Up	1.8319	1.7888	1.81029	6.73521	10.7951	5.34983	SDR1
436	TraesCS7D02G377900	96.4539	43.4237	149.484	3.44245	1.78344	0.0164095	0.125821	Up	1.1066	1.40426	1.45953	3.43231	7.43503	6.87646	NPF8.3		GO:0006857,GO:0022857,GO:0016020,GO:0055085,GO:0005215,GO:0016021	oligopeptide transport|transmembrane transporter activity|membrane|transmembrane transport|transporter activity|integral component of membrane
437	TraesCS6A02G261100	68.5437	30.857	106.23	3.44267	1.78353	0.0298866	0.185986	Up	0.892	0.807417	0.794527	2.62404	2.84807	2.63694	RVE1		GO:0005634,GO:0003677	nucleus|DNA binding
438	TraesCS2D02G549400	125.417	56.4374	194.396	3.44445	1.78427	0.0360339	0.208734	Up	2.12029	2.53722	2.20918	10.0225	7.67044	5.8105	Os04g0671100		GO:0005524,GO:0004017,GO:0006139,GO:0019205,GO:0016776,GO:0016301,GO:0016310,GO:0016740,GO:0046940	ATP binding|adenylate kinase activity|nucleobase-containing compound metabolic process|nucleobase-containing compound kinase activity|phosphotransferase activity, phosphate group as acceptor|kinase activity|phosphorylation|transferase activity|nucleoside monophosphate phosphorylation	ko00230	Purine metabolism
439	TraesCS1D02G310300	331.075	148.921	513.23	3.44633	1.78506	0.0188491	0.137991	Up	19.2493	13.8367	15.0892	43.2329	83.6585	56.4234	ICY	Cysteine proteinase inhibitor [Source:UniProtKB/TrEMBL;Acc:A0A1D6DHK4]	GO:0004869	cysteine-type endopeptidase inhibitor activity
440	TraesCS5B02G326500	2000.63	899.787	3101.48	3.44691	1.7853	0.0247336	0.165021	Up	42.3138	31.6229	30.9956	132.452	157.652	98.5421	CCP1		GO:0008234,GO:0006508	cysteine-type peptidase activity|proteolysis	ko04142,ko04210	Lysosome|Apoptosis
441	TraesCS6A02G089400	92.2223	41.4632	142.981	3.44839	1.78592	0.0432719	0.23426	Up	0.976942	0.897858	0.343233	2.80515	2.99385	1.51143	CPK4		GO:0005524,GO:0004672,GO:0005509,GO:0006468	ATP binding|protein kinase activity|calcium ion binding|protein phosphorylation
442	TraesCS4B02G132800	218.9	98.4103	339.389	3.44872	1.78606	0.0361772	0.20931	Up	4.91501	4.34502	5.16702	21.0237	19.6104	10.6442	CML50		GO:0005509	calcium ion binding
443	TraesCS2D02G359000	46.1714	20.7564	71.5864	3.44889	1.78613	0.049182	0.253287	Up	0.534674	0.8632	0.598021	2.69221	3.33714	1.7863	UGT92A1	Glycosyltransferase [Source:UniProtKB/TrEMBL;Acc:A0A1D5URJ9]	GO:0016021,GO:0016758	integral component of membrane|transferase activity, transferring hexosyl groups
444	TraesCS6B02G116800	81.8199	36.782	126.858	3.44892	1.78614	0.0217745	0.151407	Up	2.33106	2.44227	1.73642	4.49145	7.83581	8.79244	RTNLB22		GO:0016021	integral component of membrane
445	TraesCS7D02G475900	1467.45	659.615	2275.28	3.44941	1.78635	0.0342674	0.20216	Up	12.7626	9.42495	13.0037	46.3079	46.9993	23.988			GO:0005524,GO:0046034,GO:0033180,GO:0046961,GO:1902600	ATP binding|ATP metabolic process|proton-transporting V-type ATPase, V1 domain|proton-transporting ATPase activity, rotational mechanism|proton transmembrane transport	ko04145,ko00190,ko04150	Phagosome|Oxidative phosphorylation|mTOR signaling pathway
446	TraesCS7A02G012000	1218.66	547.763	1889.57	3.4496	1.78643	0.018248	0.134957	Up	11.5649	12.1698	13.7078	43.4068	49.5902	41.44	G6PGH1	6-phosphogluconate dehydrogenase, decarboxylating [Source:UniProtKB/TrEMBL;Acc:W5HFZ6]	GO:0016491,GO:0055114,GO:0050661,GO:0004616,GO:0006098,GO:0019521	oxidoreductase activity|oxidation-reduction process|NADP binding|phosphogluconate dehydrogenase (decarboxylating) activity|pentose-phosphate shunt|D-gluconate metabolic process	ko01200,ko00480,ko00030	Carbon metabolism|Glutathione metabolism|Pentose phosphate pathway
447	TraesCS6A02G360100	478.502	215.069	741.935	3.44975	1.78649	0.0383595	0.217331	Up	2.77024	2.19633	2.2077	8.25809	9.65309	4.33805	VPS15		GO:0005524,GO:0004672,GO:0006468,GO:0005515	ATP binding|protein kinase activity|protein phosphorylation|protein binding	ko04140	Regulation of autophagy
448	TraesCS7B02G164500	98.9252	44.463	153.387	3.44977	1.7865	0.0334595	0.199168	Up	1.17053	0.901777	0.891351	3.30924	4.02603	2.74282	PHR		GO:0016021,GO:0071949,GO:0006281,GO:0009650,GO:0000719,GO:0003904	integral component of membrane|FAD binding|DNA repair|UV protection|photoreactive repair|deoxyribodipyrimidine photo-lyase activity
449	TraesCS2B02G250100	106.683	47.9449	165.421	3.45023	1.78669	0.0365227	0.21067	Up	2.06377	1.06842	1.73961	7.04969	4.51273	4.65518	Os07g0507000		GO:0003824,GO:0004722,GO:0006470	catalytic activity|protein serine/threonine phosphatase activity|protein dephosphorylation
450	TraesCS7A02G095800	60.8791	27.3491	94.409	3.45199	1.78743	0.042462	0.231557	Up	0.259894	0.289145	0.244211	0.889148	0.962151	0.63294	RGA1		GO:0043531	ADP binding
451	TraesCS1D02G220000	60.6181	27.2288	94.0073	3.4525	1.78764	0.0499537	0.255602	Up	0.655339	0.609898	0.36397	1.84483	1.87354	1.08304	ABCE2		GO:0005524,GO:0016887	ATP binding|ATPase activity
452	TraesCS1A02G201400	49.1638	22.0767	76.2509	3.45391	1.78823	0.0458827	0.243046	Up	0.822534	0.166271	0.370868	1.20571	3.21235	1.4262	PMI1
453	TraesCS7D02G358200	992.883	445.833	1539.93	3.45406	1.78829	0.0337609	0.200248	Up	11.6972	7.75865	9.15452	31.8211	37.6024	18.3377
454	TraesCS4A02G027800	2418.91	1085.94	3751.89	3.45497	1.78867	0.0203738	0.144944	Up	46.5529	37.6	45.2811	150.632	135.852	130.227	ARD2	1,2-dihydroxy-3-keto-5-methylthiopentene dioxygenase [Source:UniProtKB/TrEMBL;Acc:W5DWS0]	GO:0005737,GO:0016491,GO:0005634,GO:0005506,GO:0055114,GO:0019509,GO:0010309,GO:0046872,GO:0008652,GO:0051213,GO:0009086	cytoplasm|oxidoreductase activity|nucleus|iron ion binding|oxidation-reduction process|L-methionine salvage from methylthioadenosine|acireductone dioxygenase [iron(II)-requiring] activity|metal ion binding|cellular amino acid biosynthetic process|dioxygenase activity|methionine biosynthetic process	ko00270	Cysteine and methionine metabolism
455	TraesCS3B02G267400	866.573	389.013	1344.13	3.45524	1.78879	0.027935	0.178486	Up	11.8252	10.3588	16.8853	49.6406	46.0196	31.8113	VATE		GO:0015991,GO:0033178,GO:0046961,GO:1902600	GO_0015991|proton-transporting two-sector ATPase complex, catalytic domain|proton-transporting ATPase activity, rotational mechanism|proton transmembrane transport	ko04145,ko00190,ko04150	Phagosome|Oxidative phosphorylation|mTOR signaling pathway
456	TraesCS6B02G386200	77.8103	34.9265	120.694	3.45565	1.78896	0.0336323	0.199778	Up	0.990434	1.03532	0.549979	3.68138	3.41136	2.92435	ATG18B		GO:0005515	protein binding
457	TraesCS1A02G399600	230.421	103.423	357.418	3.45588	1.78905	0.0347423	0.203985	Up	8.28311	7.32143	4.95697	28.7523	27.5202	20.1485	At1g29970
458	TraesCS4A02G498700	73.6228	33.0368	114.209	3.45702	1.78953	0.0432252	0.234106	Up	0.99018	0.644681	1.04378	3.63678	3.68084	2.15751	PUB12	RING-type E3 ubiquitin transferase [Source:UniProtKB/TrEMBL;Acc:A0A341U091]	GO:0004842,GO:0016567,GO:0005515	ubiquitin-protein transferase activity|protein ubiquitination|protein binding
459	TraesCS3A02G189500	29.9867	13.4552	46.5183	3.45728	1.78964	0.0407381	0.22558	Up	0.350403	0.600217	0.676207	1.59944	1.62901	1.96559			GO:0016021,GO:0016020	integral component of membrane|membrane
460	TraesCS2D02G288100	70.0477	31.4249	108.67	3.4581	1.78998	0.0336416	0.199807	Up	1.07799	0.883224	0.86882	3.04675	4.05673	3.03888
461	TraesCS1A02G230500	122.839	55.0671	190.61	3.46141	1.79136	0.0337053	0.200037	Up	1.74435	2.31787	1.42458	6.27482	9.99424	4.52034	CSE
462	TraesCS5A02G148000	281.453	126.163	436.744	3.46174	1.7915	0.0156794	0.122033	Up	0.877446	1.06619	5.61907	8.10715	8.33929	9.37019	CIPK15	Non-specific serine/threonine protein kinase [Source:UniProtKB/TrEMBL;Acc:A0A1D5YC72]	GO:0005524,GO:0004672,GO:0004674,GO:0007165,GO:0006468	ATP binding|protein kinase activity|protein serine/threonine kinase activity|signal transduction|protein phosphorylation	ko04140,ko04152,ko04068,ko04151,ko04150	Regulation of autophagy|AMPK signaling pathway|FoxO signaling pathway|PI3K-Akt signaling pathway|mTOR signaling pathway
463	TraesCS6B02G245900	408.259	182.974	633.545	3.46249	1.79181	0.034341	0.202415	Up	4.46272	4.37935	3.21676	15.6925	13.3319	8.85403	ARI8	RBR-type E3 ubiquitin transferase [Source:UniProtKB/TrEMBL;Acc:A0A1D6AA87]	GO:0004842,GO:0016567,GO:0046872	ubiquitin-protein transferase activity|protein ubiquitination|metal ion binding
464	TraesCS7A02G470400	236.964	106.183	367.745	3.46333	1.79216	0.023576	0.159881	Up	2.19075	1.76158	1.25752	5.3588	4.64043	5.33692	MCSU3	Molybdenum cofactor sulfurase [Source:UniProtKB/TrEMBL;Acc:A0A1D6BMJ2]	GO:0030170,GO:0003824,GO:0016829,GO:0030151,GO:0006777,GO:0008265,GO:0102867	pyridoxal phosphate binding|catalytic activity|lyase activity|molybdenum ion binding|Mo-molybdopterin cofactor biosynthetic process|Mo-molybdopterin cofactor sulfurase activity|molybdenum cofactor sulfurtransferase activity
465	TraesCS2D02G284500	300.408	134.567	466.248	3.46479	1.79277	0.0308367	0.189513	Up	8.80285	6.93696	5.80931	27.2779	21.5379	16.8392	MUB4	Membrane-anchored ubiquitin-fold protein [Source:UniProtKB/TrEMBL;Acc:W5B7G0]	GO:0005886,GO:0016020	plasma membrane|membrane
466	TraesCS5A02G284600	410.972	184.069	637.876	3.46542	1.79303	0.0171266	0.129509	Up	6.04107	5.39443	7.13252	10.6693	32.7887	18.2777	PYD3		GO:0006807,GO:0005829,GO:0043562,GO:0006212,GO:0003837	nitrogen compound metabolic process|cytosol|cellular response to nitrogen levels|uracil catabolic process|beta-ureidopropionase activity	ko00770,ko00240,ko00983,ko00410	Pantothenate and CoA biosynthesis|Pyrimidine metabolism|Drug metabolism - other enzymes|beta-Alanine metabolism
467	TraesCS6A02G395100	119.586	53.5604	185.612	3.46548	1.79305	0.0279793	0.17868	Up	1.05172	4.62368	3.75905	12.638	13.756	9.30962	SPAC24H6.02c		GO:0008270	zinc ion binding
468	TraesCS7A02G116100	62.0444	27.7883	96.3005	3.4655	1.79307	0.0393818	0.221112	Up	1.81781	0.77822	0.75639	5.53346	4.54532	3.8864					ko03018	RNA degradation
469	TraesCS3A02G238700	639.291	286.263	992.319	3.46646	1.79346	0.0304744	0.188008	Up	13.0797	12.7173	18.407	56.9823	53.3476	32.7776	VATE	Vacuolar proton ATPase subunit E [Source:UniProtKB/TrEMBL;Acc:Q2XP43]	GO:0015991,GO:0033178,GO:0046961,GO:1902600	GO_0015991|proton-transporting two-sector ATPase complex, catalytic domain|proton-transporting ATPase activity, rotational mechanism|proton transmembrane transport	ko04145,ko00190,ko04150	Phagosome|Oxidative phosphorylation|mTOR signaling pathway
470	TraesCS7A02G304800	156.701	70.1674	243.234	3.46648	1.79347	0.0236265	0.160032	Up	2.67746	3.20414	3.79887	12.7796	14.1609	10.6797	PP2B10		GO:0005515	protein binding
471	TraesCS2A02G177200	46.8213	20.9642	72.6784	3.46678	1.7936	0.0429069	0.233173	Up	0.97022	0.777566	0.536951	2.19229	3.33307	1.86044			GO:0003824,GO:0050662	catalytic activity|coenzyme binding
472	TraesCS6D02G038500	843.027	377.398	1308.66	3.46758	1.79393	0.0146022	0.116386	Up	20.7869	12.3305	17.6664	56.2856	73.5026	69.3441	IDS3		GO:0046872,GO:0016491,GO:0055114	metal ion binding|oxidoreductase activity|oxidation-reduction process
473	TraesCS7D02G476700	87.973	39.3825	136.563	3.46761	1.79394	0.0237311	0.16054	Up	6.64928	2.39986	4.08677	14.5292	17.7324	14.6272	dph3
474	TraesCS6B02G213700	975.01	436.339	1513.68	3.46905	1.79454	0.0126788	0.105914	Up	7.07561	5.54131	7.34522	18.9174	22.0622	28.0153	Os02g0218200	Aminopeptidase [Source:UniProtKB/TrEMBL;Acc:A0A1D6B0C9]	GO:0008270,GO:0004177,GO:0008237,GO:0006508	zinc ion binding|aminopeptidase activity|metallopeptidase activity|proteolysis
475	TraesCS7D02G286800	212.743	95.1773	330.309	3.47045	1.79512	0.0366968	0.21134	Up	2.16681	1.39664	1.98738	6.06474	6.43864	3.1543	TH2
476	TraesCS7B02G168000	424.145	189.675	658.615	3.47234	1.79591	0.0332288	0.1984	Up	3.27907	3.13841	3.6346	12.5289	11.1906	7.70032	PUX8		GO:0005515	protein binding
477	TraesCS5B02G184100	199.465	89.1845	309.745	3.47308	1.79621	0.0171012	0.12939	Up	3.06357	3.20057	2.44288	9.50826	10.7238	11.2157	NIFS1		GO:0005524,GO:0008270,GO:0030170,GO:0003824,GO:0005739,GO:0031071,GO:0044571	ATP binding|zinc ion binding|pyridoxal phosphate binding|catalytic activity|mitochondrion|cysteine desulfurase activity|[2Fe-2S] cluster assembly	ko00730,ko04122	Thiamine metabolism|Sulfur relay system
478	TraesCS1B02G327300	146.078	65.2972	226.859	3.47425	1.7967	0.0358142	0.207976	Up	1.46767	1.16754	1.26479	5.97225	5.41465	3.23744	RING1A
479	TraesCS3A02G318400	172.017	76.8784	267.155	3.47504	1.79703	0.040276	0.224168	Up	2.49508	2.5175	2.22104	7.94929	11.1678	4.04113	KMS1
480	TraesCS7B02G018300	269.725	120.522	418.928	3.47595	1.79741	0.0397855	0.222597	Up	8.11006	5.61429	4.7456	23.6867	22.7416	11.6326			GO:0043130,GO:0000813,GO:0043162	ubiquitin binding|ESCRT I complex|ubiquitin-dependent protein catabolic process via the multivesicular body sorting pathway
481	TraesCS3D02G249300	192.487	85.9413	299.033	3.4795	1.79888	0.0260686	0.171148	Up	6.51328	3.97844	5.54501	23.5356	28.7092	18.9942	CDA1	Cytidine deaminase [Source:UniProtKB/TrEMBL;Acc:A0A1D5WLC9]	GO:0008270,GO:0016787,GO:0003824,GO:0004126,GO:0009972	zinc ion binding|hydrolase activity|catalytic activity|cytidine deaminase activity|cytidine deamination	ko00983,ko00240	Drug metabolism - other enzymes|Pyrimidine metabolism
482	TraesCS6D02G293300	210.84	94.1215	327.559	3.48018	1.79916	0.0240747	0.161899	Up	5.29217	4.94173	6.12367	17.7801	25.2977	16.5968	PHOS34
483	TraesCS2D02G387800	847.211	378.191	1316.23	3.48034	1.79923	0.0191923	0.139494	Up	7.7342	8.56595	12.5672	30.5016	48.5026	30.0796	YSL16		GO:0016021,GO:0055085,GO:0016020	integral component of membrane|transmembrane transport|membrane
484	TraesCS2A02G503200	431.104	192.331	669.877	3.48294	1.80031	0.0498751	0.255356	Up	4.03064	2.37688	2.20148	12.4242	9.26463	5.98532	KAKU4
485	TraesCS1D02G340500	138.384	61.7151	215.054	3.48462	1.801	0.012944	0.10719	Up	1.9558	2.59144	2.86839	4.78144	8.848	10.6797	GGH1	Gamma-glutamyl hydrolase [Source:UniProtKB/TrEMBL;Acc:A0A341PYT2]	GO:0016787,GO:0008242	hydrolase activity|omega peptidase activity	ko00790	Folate biosynthesis
486	TraesCS2D02G194200	410.744	183.176	638.313	3.4847	1.80103	0.0286367	0.181138	Up	7.14426	4.47795	2.62665	18.5444	14.9939	13.1367
487	TraesCS7A02G311000	355.258	158.431	552.085	3.4847	1.80104	0.0295958	0.184865	Up	3.12533	3.28162	3.71924	10.7926	11.187	7.56236	WDR26		GO:0005515	protein binding
488	TraesCS4B02G299700	498.969	222.506	775.432	3.48499	1.80115	0.0203187	0.144765	Up	19.6971	9.56935	8.01398	48.8907	57.1419	44.9302	RAP2-3		GO:0003700,GO:0006351,GO:0005634,GO:0003677,GO:0006355	DNA-binding transcription factor activity|transcription, DNA-templated|nucleus|DNA binding|regulation of transcription, DNA-templated
489	TraesCS2B02G214300	35.005	15.6097	54.4002	3.48502	1.80117	0.0372404	0.21327	Up	0.534249	0.544722	0.48113	1.82348	2.34679	2.0962	At4g10955
490	TraesCS7A02G489500	1463.05	652.347	2273.75	3.4855	1.80136	0.0311111	0.190439	Up	14.3868	12.6559	14.6521	52.4923	59.5649	28.8001			GO:0005524,GO:0046034,GO:0033180,GO:0046961,GO:1902600	ATP binding|ATP metabolic process|proton-transporting V-type ATPase, V1 domain|proton-transporting ATPase activity, rotational mechanism|proton transmembrane transport	ko04145,ko00190,ko04150	Phagosome|Oxidative phosphorylation|mTOR signaling pathway
491	TraesCS3D02G105300	269.025	119.931	418.119	3.48632	1.80171	0.0368845	0.212005	Up	3.27806	2.92386	3.12087	11.3914	11.2129	5.81433	ZFP1
492	TraesCS6D02G081700	86.594	38.5813	134.607	3.48891	1.80278	0.0368736	0.211992	Up	1.46141	0.751993	1.54453	3.96671	2.54613	3.45483	RBP45		GO:0003676,GO:0003723	nucleic acid binding|RNA binding
493	TraesCS2B02G521800	123.13	54.8592	191.4	3.48894	1.80279	0.0141902	0.11421	Up	4.42217	0.973988	0.992058	4.4538	6.83381	9.00014			GO:0005524,GO:0004672,GO:0004674,GO:0006468,GO:0000166,GO:0016301,GO:0016310	ATP binding|protein kinase activity|protein serine/threonine kinase activity|protein phosphorylation|nucleotide binding|kinase activity|phosphorylation	ko04075	Plant hormone signal transduction
494	TraesCS2D02G101000	447.008	199.155	694.861	3.48904	1.80283	0.0245083	0.163968	Up	15.0165	2.94527	17.8824	52.0194	36.7688	33.7273	R40G3	Stress responsive protein 2 [Source:UniProtKB/TrEMBL;Acc:Q4U0C9]
495	TraesCS1A02G213400	361.327	160.946	561.709	3.49003	1.80324	0.0299658	0.186163	Up	4.25322	2.16073	2.39359	10.6273	10.8335	7.18524	At1g26850		GO:0016021,GO:0008168,GO:0005774,GO:0009505,GO:0005802,GO:0005768	integral component of membrane|methyltransferase activity|vacuolar membrane|plant-type cell wall|trans-Golgi network|endosome
496	TraesCS2A02G224000	1141.29	508.081	1774.5	3.49256	1.80429	0.0264426	0.172659	Up	40.1763	40.4314	43.2545	169.337	163.374	102.401	ATG8A	Autophagy-related protein [Source:UniProtKB/TrEMBL;Acc:Q7XY24]	GO:0006914,GO:0005737	autophagy|cytoplasm	ko04068,ko04140,ko04139	FoxO signaling pathway|Regulation of autophagy|Regulation of mitophagy - yeast
497	TraesCS5D02G087400	16.7567	7.45614	26.0573	3.49475	1.80519	0.0483969	0.250824	Up	0.0702951	0.649323	0.337474	0.883951	0.704332	1.19448
498	TraesCS6A02G353800	1710.14	760.682	2659.6	3.49633	1.80584	0.046477	0.244947	Up	30.9542	27.7108	24.0606	129.634	110.261	59.0594	SPAPB1A10.07c		GO:0016021,GO:0016020	integral component of membrane|membrane
499	TraesCS6D02G203000	335.742	149.317	522.167	3.49704	1.80613	0.0346826	0.203768	Up	6.49061	4.59297	6.8647	29.0185	27.9898	12.8928	HCT2		GO:0016747	transferase activity, transferring acyl groups other than amino-acyl groups	ko00940,ko00945,ko00941	Phenylpropanoid biosynthesis|Stilbenoid, diarylheptanoid and gingerol biosynthesis|Flavonoid biosynthesis
500	TraesCS4B02G006600	396.129	176.072	616.187	3.49963	1.8072	0.0236809	0.16028	Up	5.81989	7.85617	5.25122	16.0152	41.0184	16.4513	At5g03610		GO:0016788	hydrolase activity, acting on ester bonds
501	TraesCS4D02G285600	330.8	147.031	514.568	3.49971	1.80724	0.0309452	0.189874	Up	13.8794	8.78306	7.84496	40.0265	47.7321	23.5554
502	TraesCS2A02G496200	131.161	58.2889	204.032	3.50036	1.8075	0.0338496	0.200581	Up	3.18663	2.86549	3.23288	15.6104	12.4408	8.71193	MOT2		GO:0016021,GO:0015098,GO:0090414,GO:0009705,GO:0015689	integral component of membrane|molybdate ion transmembrane transporter activity|molybdate ion export from vacuole|plant-type vacuole membrane|molybdate ion transport
503	TraesCS1B02G318400	304.855	135.44	474.271	3.50171	1.80806	0.0439429	0.236413	Up	3.80974	2.82492	4.04959	14.4231	11.3345	6.97087	SPAC24B11.08c		GO:0016021	integral component of membrane
504	TraesCS7D02G535700	134.214	59.6272	208.8	3.50176	1.80808	0.0445596	0.238562	Up	1.02089	0.994025	1.19017	4.7501	4.33167	2.29413	LAZ1		GO:0016021,GO:0009626	integral component of membrane|plant-type hypersensitive response
505	TraesCS1B02G099600	543.313	241.345	845.281	3.50238	1.80834	0.0156975	0.122127	Up	1.73746	8.48707	10.7695	17.2869	35.0944	21.7988	RAP		GO:0006629,GO:0004190,GO:0006508	lipid metabolic process|aspartic-type endopeptidase activity|proteolysis
506	TraesCS2B02G250400	178.324	79.166	277.482	3.50507	1.80944	0.0295561	0.184704	Up	1.08735	0.800908	1.20758	3.76983	4.42652	2.48618	FPP
507	TraesCS1A02G420500	220.596	97.9184	343.273	3.5057	1.8097	0.0496803	0.254756	Up	1.77634	1.32007	1.26438	6.49636	4.65894	3.31679	zuo1		GO:0003677	DNA binding
508	TraesCS3D02G285700	2832.54	1257.11	4407.97	3.50643	1.81	0.0163445	0.12549	Up	24.9447	14.0644	17.9393	51.5962	69.102	60.9865		Malic enzyme [Source:UniProtKB/TrEMBL;Acc:A0A1D5WEU7]	GO:0046872,GO:0051287,GO:0004471,GO:0055114,GO:0004470	metal ion binding|NAD binding|malate dehydrogenase (decarboxylating) (NAD+) activity|oxidation-reduction process|malic enzyme activity	ko00710,ko01200,ko00620	Carbon fixation in photosynthetic organisms|Carbon metabolism|Pyruvate metabolism
509	TraesCS5D02G313900	209.604	93.0228	326.186	3.50652	1.81004	0.0224482	0.154761	Up	4.07567	2.70491	4.35823	11.3682	12.985	11.1944	Os09g0520200		GO:0003824	catalytic activity
510	TraesCS1A02G373000	84.9223	37.6811	132.164	3.50743	1.81041	0.0412945	0.22756	Up	1.69429	1.64173	1.33424	6.99692	7.2027	4.11816	LPP2		GO:0016021	integral component of membrane
511	TraesCS2B02G474200	179.713	79.7284	279.697	3.50813	1.8107	0.035554	0.207066	Up	6.57377	10.7031	6.76352	24.587	41.8443	12.1599			GO:0004857	enzyme inhibitor activity
512	TraesCS2A02G201800	132.046	58.5719	205.52	3.50886	1.811	0.0325218	0.195724	Up	1.78341	1.38383	1.61211	5.82149	5.39604	4.00752	NAM-B2		GO:0005634,GO:0003677,GO:0006355	nucleus|DNA binding|regulation of transcription, DNA-templated
513	TraesCS7B02G346600	40.1814	17.8223	62.5405	3.50911	1.81111	0.0423534	0.231279	Up	0.741622	0.89915	0.387228	1.77304	2.62038	1.70207	HCC1		GO:0005507,GO:0045454,GO:0005743,GO:0006825,GO:0006878,GO:0008535	copper ion binding|cell redox homeostasis|mitochondrial inner membrane|copper ion transport|cellular copper ion homeostasis|respiratory chain complex IV assembly
514	TraesCS5B02G104500	205.378	91.0717	319.684	3.51024	1.81157	0.0275736	0.176996	Up	1.21194	1.24931	1.78125	2.89598	5.84033	3.88271	GSH2	Glutathione synthetase [Source:UniProtKB/TrEMBL;Acc:A0A341V8M9]	GO:0005524,GO:0016874,GO:0004363,GO:0006750	ATP binding|ligase activity|glutathione synthase activity|glutathione biosynthetic process	ko00480,ko00270	Glutathione metabolism|Cysteine and methionine metabolism
515	TraesCS1A02G210200	820.844	363.973	1277.71	3.51046	1.81166	0.0314758	0.191676	Up	8.59956	8.34356	10.0665	36.2676	33.0695	18.3354	AIM32
516	TraesCS7D02G278400	221.225	98.0932	344.356	3.5105	1.81167	0.0208765	0.147078	Up	1.97523	2.31651	2.94451	6.66754	11.3926	7.53525	URH1				ko00240,ko00760	Pyrimidine metabolism|Nicotinate and nicotinamide metabolism
517	TraesCS3B02G486100	311.787	138.145	485.429	3.51391	1.81308	0.022228	0.153681	Up	3.50108	3.30993	4.52769	14.037	15.8225	12.0826	Os01g0505400		GO:0003824,GO:0000287,GO:0030976	catalytic activity|magnesium ion binding|thiamine pyrophosphate binding	ko04146	Peroxisome
518	TraesCS2A02G134400	226.166	100.208	352.124	3.51391	1.81308	0.0309071	0.189771	Up	3.113	3.36592	2.77594	15.2587	13.5201	8.08753	PNS1
519	TraesCS7B02G175000	214.293	94.9128	333.673	3.51557	1.81376	0.034508	0.203055	Up	1.29854	1.51959	1.10024	4.92255	5.87781	2.95479	MTM1		GO:0004725,GO:0016311	protein tyrosine phosphatase activity|dephosphorylation	ko00562,ko04070	Inositol phosphate metabolism|Phosphatidylinositol signaling system
520	TraesCS2B02G261000	611.001	270.556	951.446	3.51663	1.81419	0.0297681	0.18545	Up	4.88949	3.63856	4.14246	15.6956	12.9282	8.70112	FTIP7
521	TraesCS2B02G197000	83.3177	36.8896	129.746	3.51714	1.8144	0.0401856	0.223821	Up	1.02569	0.625037	1.42186	6.08718	4.65339	2.64307	RIPK		GO:0005524,GO:0004672,GO:0006468	ATP binding|protein kinase activity|protein phosphorylation
522	TraesCS4D02G185100	216.522	95.8491	337.196	3.51799	1.81475	0.0271655	0.175275	Up	4.68543	3.38878	4.10007	13.9508	18.1451	10.9627
523	TraesCS3A02G300600	66.1811	29.2912	103.071	3.51884	1.8151	0.0411355	0.226949	Up	0.881138	0.602908	0.487672	1.80207	3.59032	1.46894
524	TraesCS5A02G109000	186.714	82.6381	290.791	3.51885	1.8151	0.0313169	0.191127	Up	3.12791	3.55974	3.83739	14.3137	17.4035	7.34885	PAE1	Proteasome endopeptidase complex [Source:UniProtKB/TrEMBL;Acc:A0A341V571]	GO:0004298,GO:0005839,GO:0051603	threonine-type endopeptidase activity|proteasome core complex|proteolysis involved in cellular protein catabolic process	ko03050	Proteasome
525	TraesCS1A02G400600	27.5038	12.1711	42.8366	3.51953	1.81538	0.0405663	0.225096	Up	0.704062	1.10329	0.593306	3.44115	2.94639	3.3113	At1g71180		GO:0016491,GO:0051287,GO:0055114,GO:0050661	oxidoreductase activity|NAD binding|oxidation-reduction process|NADP binding
526	TraesCS5B02G106800	300.783	133.048	468.519	3.52143	1.81616	0.0259755	0.170761	Up	6.175	5.37773	6.43226	27.4097	26.6078	17.4334	PLT5		GO:0016021,GO:0022857,GO:0016020,GO:0055085,GO:0005215	integral component of membrane|transmembrane transporter activity|membrane|transmembrane transport|transporter activity
527	TraesCS1D02G322000	86.3259	38.1831	134.469	3.52168	1.81626	0.0291449	0.183034	Up	0.853304	1.06064	0.971569	2.94626	6.47237	2.89345	CNGC4		GO:0016021,GO:0016020,GO:0055085,GO:0005216,GO:0006811	integral component of membrane|membrane|transmembrane transport|ion channel activity|ion transport
528	TraesCS2B02G602700	249.471	110.334	388.608	3.5221	1.81644	0.0249528	0.166137	Up	7.89096	7.24305	4.85893	29.6602	35.2012	21.4955
529	TraesCS3D02G183900	147.828	65.3723	230.284	3.52265	1.81666	0.0395233	0.221611	Up	1.47584	1.60372	1.27605	4.70538	5.65745	2.5343	NAC074		GO:0016021,GO:0005634,GO:0003677,GO:0006355	integral component of membrane|nucleus|DNA binding|regulation of transcription, DNA-templated
530	TraesCS3A02G347400	60.8491	26.9043	94.7939	3.52337	1.81696	0.0169305	0.128571	Up	1.65531	0.659961	1.40986	13.2051	3.56965	9.52873	HIPP45		GO:0046872,GO:0030001	metal ion binding|metal ion transport
531	TraesCS4A02G117900	187.293	82.7885	291.797	3.52461	1.81746	0.0425396	0.231853	Up	0.782937	0.847752	0.995703	4.02896	3.71574	1.67154	SPCC126.07c		GO:0046872	metal ion binding
532	TraesCS5A02G357000	253.146	111.857	394.435	3.52624	1.81813	0.0334838	0.199252	Up	2.90709	1.31465	1.51617	7.50434	7.70769	4.24993	PHOX1		GO:0005515	protein binding
533	TraesCS4D02G179700	153.484	67.8142	239.154	3.5266	1.81828	0.0315836	0.192026	Up	1.52599	1.21185	1.48691	4.38476	7.62492	3.18316	CIPK31	Non-specific serine/threonine protein kinase [Source:UniProtKB/TrEMBL;Acc:K7SGP0]	GO:0005524,GO:0004672,GO:0004674,GO:0007165,GO:0006468,GO:0000166,GO:0016301,GO:0016310,GO:0016740	ATP binding|protein kinase activity|protein serine/threonine kinase activity|signal transduction|protein phosphorylation|nucleotide binding|kinase activity|phosphorylation|transferase activity
534	TraesCS5B02G372000	58.6692	25.9058	91.4326	3.52943	1.81943	0.0372162	0.213227	Up	1.14593	1.02773	1.28436	3.54182	5.21761	2.98064	Os07g0688000		GO:0016787	hydrolase activity	ko00230,ko00564	Purine metabolism|Glycerophospholipid metabolism
535	TraesCS7B02G094900	203.745	89.9608	317.53	3.52964	1.81952	0.0280821	0.179054	Up	5.18256	4.41338	3.03311	18.0042	14.936	12.2788	ATL24		GO:0016021	integral component of membrane
536	TraesCS7A02G517900	458.825	202.574	715.077	3.52996	1.81965	0.0237589	0.160658	Up	7.10602	4.72666	5.79369	18.7103	22.6925	13.832	ACPEPP	Purple acid phosphatase [Source:UniProtKB/TrEMBL;Acc:W5H8B8]	GO:0046872,GO:0016787,GO:0003993,GO:0005829,GO:0055062,GO:0005773,GO:0009505	metal ion binding|hydrolase activity|acid phosphatase activity|cytosol|phosphate ion homeostasis|vacuole|plant-type cell wall
537	TraesCS3D02G246000	117.384	51.806	182.962	3.53167	1.82035	0.0395678	0.221768	Up	0.542606	0.371155	0.676549	1.76365	2.4921	0.966302	CALS12		GO:0016020,GO:0000148,GO:0003843,GO:0006075	membrane|1,3-beta-D-glucan synthase complex|1,3-beta-D-glucan synthase activity|(1->3)-beta-D-glucan biosynthetic process
538	TraesCS7D02G356800	118.744	52.3979	185.089	3.53238	1.82064	0.0382062	0.216868	Up	1.48222	1.12471	1.00651	4.33337	4.97962	2.49577	HDAC1	Histone deacetylase [Source:UniProtKB/TrEMBL;Acc:A0A341Z0C1]	GO:0016575,GO:0004407	histone deacetylation|histone deacetylase activity	ko04330,ko04110	Notch signaling pathway|Cell cycle
539	TraesCS2B02G215800	715.754	315.831	1115.68	3.53252	1.8207	0.0269385	0.174316	Up	17.6689	16.8687	17.4952	77.2838	69.1004	41.0751
540	TraesCS7D02G248900	314.016	138.542	489.489	3.53314	1.82095	0.0413839	0.227881	Up	2.35344	1.86782	3.20987	9.80119	10.2896	4.22639			GO:0005515	protein binding
541	TraesCS5A02G384600	401.22	176.996	625.443	3.53365	1.82116	0.0240694	0.161897	Up	18.7284	9.29594	10.3299	41.7123	87.7831	36.9461	FLZ10
542	TraesCS6B02G434700	842.789	371.605	1313.97	3.53594	1.82209	0.0306002	0.188609	Up	3.95374	3.41732	3.89345	13.8594	15.183	7.47674			GO:0016021	integral component of membrane
543	TraesCS1B02G266200	317.898	140.165	495.631	3.53605	1.82214	0.0256999	0.169645	Up	3.16029	2.43843	2.76333	10.5585	10.739	7.66096
544	TraesCS3A02G234900	151.767	66.9124	236.621	3.53629	1.82224	0.0288453	0.181922	Up	4.18871	2.77913	2.03494	10.8515	9.48772	8.57148	At1g28600		GO:0016788	hydrolase activity, acting on ester bonds
545	TraesCS4A02G001900	53.2139	23.4595	82.9683	3.53666	1.82239	0.026155	0.171603	Up	1.00571	1.63942	2.35402	4.48537	7.86018	6.53598
546	TraesCS1D02G067900	398.141	175.504	620.779	3.53712	1.82257	0.0343988	0.202618	Up	5.68973	2.72923	2.03841	12.4536	14.0201	6.62293	ycf45		GO:0005524	ATP binding
547	TraesCS7B02G083600	249.69	110.06	389.319	3.53733	1.82266	0.0237999	0.1608	Up	6.65382	4.30526	5.81163	21.7951	22.6415	17.9763	PABN3		GO:0003676,GO:0003723	nucleic acid binding|RNA binding	ko03015	mRNA surveillance pathway
548	TraesCS1A02G236100	22.3197	9.83817	34.8013	3.53738	1.82268	0.0434514	0.234905	Up	0.0364241	0.11026	0.235636	0.417826	0.636557	0.784929	BON3		GO:0005544,GO:0060548	calcium-dependent phospholipid binding|negative regulation of cell death
549	TraesCS2A02G168100	236.75	104.347	369.153	3.53775	1.82283	0.0350501	0.20513	Up	3.99276	3.36499	2.67766	11.1559	13.3643	6.13838	YSC84		GO:0046872	metal ion binding
550	TraesCS2D02G298000	278.307	122.644	433.97	3.53844	1.82311	0.0292651	0.183544	Up	1.90454	1.44948	1.89433	5.95419	7.21253	3.81083	SEC5B		GO:0000145,GO:0006893	exocyst|Golgi to plasma membrane transport	ko04014	Ras signaling pathway
551	TraesCS7A02G490400	176.563	77.8079	275.319	3.53844	1.82311	0.0378631	0.215561	Up	7.70495	7.90371	6.62473	38.8791	37.0548	15.9923
552	TraesCS6B02G259600	201.157	88.636	313.678	3.53894	1.82332	0.0472761	0.247394	Up	1.20096	0.604085	0.836041	3.44947	2.76685	1.254	UPF2		GO:0003723,GO:0000184,GO:0005515	RNA binding|nuclear-transcribed mRNA catabolic process, nonsense-mediated decay|protein binding	ko03015,ko03013	mRNA surveillance pathway|RNA transport
553	TraesCS5D02G084900	37.5623	16.5493	58.5753	3.53945	1.82353	0.0362699	0.209667	Up	0.724205	0.269194	0.465973	1.08679	2.44716	1.67025	NRAMP6		GO:0030001,GO:0016020,GO:0046873	metal ion transport|membrane|metal ion transmembrane transporter activity	ko04142	Lysosome
554	TraesCS1A02G202300	228.011	100.421	355.602	3.54111	1.8242	0.0283331	0.179996	Up	3.55208	2.62932	4.06032	14.2139	10.484	8.3242	PP2C27		GO:0046872,GO:0003824,GO:0004722,GO:0043169,GO:0006470	metal ion binding|catalytic activity|protein serine/threonine phosphatase activity|cation binding|protein dephosphorylation
555	TraesCS4A02G415500	373.312	164.403	582.222	3.54143	1.82433	0.0460001	0.243445	Up	9.38127	9.66364	11.2089	45.2721	42.4032	18.2316
556	TraesCS7D02G136300	148.943	65.5705	232.316	3.543	1.82497	0.035177	0.205648	Up	3.66699	2.95996	3.23573	14.0893	13.54	7.23663	VAMP711		GO:0016021,GO:0016192	integral component of membrane|vesicle-mediated transport	ko04130	SNARE interactions in vesicular transport
557	TraesCS7B02G069500	206.368	90.7731	321.964	3.5469	1.82656	0.0181767	0.134641	Up	2.3706	2.91352	2.32834	10.5648	7.81542	9.46084	FAP2		GO:0016872	intramolecular lyase activity
558	TraesCS1B02G111300	42.6048	18.7388	66.4707	3.54722	1.82669	0.0461524	0.243926	Up	0.0351296	1.2402	1.17047	3.30096	4.59473	1.82106			GO:0016021,GO:0005515	integral component of membrane|protein binding
559	TraesCS6A02G282000	131.089	57.647	204.532	3.548	1.82701	0.0286749	0.181276	Up	1.32185	1.39625	1.30285	3.85528	3.2321	2.81343	MKRN		GO:0046872	metal ion binding
560	TraesCS7D02G439300	2228.63	980.021	3477.25	3.54813	1.82706	0.0171624	0.1297	Up	33.6692	24.7994	23.9746	73.2994	128.831	84.4812	CYP72A15		GO:0016021,GO:0020037,GO:0004497,GO:0005506,GO:0016705,GO:0055114	integral component of membrane|heme binding|monooxygenase activity|iron ion binding|oxidoreductase activity, acting on paired donors, with incorporation or reduction of molecular oxygen|oxidation-reduction process
561	TraesCS2A02G444300	65.9889	29.0174	102.96	3.54823	1.8271	0.0484483	0.251005	Up	2.1079	0.95823	1.65518	7.0773	5.97509	3.00453	AE7		GO:0106035	protein maturation by [4Fe-4S] cluster transfer
562	TraesCS5D02G191500	545.939	239.929	851.949	3.55084	1.82816	0.0216889	0.150956	Up	5.99915	5.02499	10.047	20.0221	34.7422	17.9046	At2g25737		GO:0016021	integral component of membrane
563	TraesCS4B02G318800	192.643	84.6423	300.644	3.55194	1.82861	0.0236183	0.160019	Up	6.39843	3.75705	1.5808	12.7368	20.8049	12.0396
564	TraesCS6B02G173100	149.908	65.8439	233.973	3.55344	1.82922	0.0331969	0.198347	Up	1.2669	1.34054	1.27893	4.55689	5.6774	2.68584	PAT24	S-acyltransferase [Source:UniProtKB/TrEMBL;Acc:A0A1D6AWD0]	GO:0016021,GO:0019706,GO:0005515	integral component of membrane|protein-cysteine S-palmitoyltransferase activity|protein binding
565	TraesCS2B02G307400	228.619	100.414	356.825	3.55353	1.82925	0.0170947	0.129371	Up	3.13734	4.0613	2.61234	9.14676	14.7748	11.1702			GO:0016021	integral component of membrane
566	TraesCS3A02G404300	234.572	102.966	366.179	3.55632	1.83038	0.0226149	0.155389	Up	3.09957	4.13882	4.28911	16.3165	15.6254	11.4375
567	TraesCS7B02G277000	515.478	226.205	804.752	3.55762	1.83091	0.0255861	0.169121	Up	8.33497	6.10863	6.68058	25.7636	31.8031	18.2956	HO1		GO:0055114,GO:0004392,GO:0006788,GO:0016491,GO:0009536	oxidation-reduction process|heme oxygenase (decyclizing) activity|heme oxidation|oxidoreductase activity|plastid	ko00860	Porphyrin and chlorophyll metabolism
568	TraesCS7B02G169200	22.2233	9.75154	34.695	3.5579	1.83103	0.0180859	0.134229	Up	0.18282	0.696692	0.402472	0.697236	1.28654	2.968	SRS1
569	TraesCS2A02G433000	443.366	194.54	692.192	3.5581	1.83111	0.0274452	0.176439	Up	14.8039	12.1254	9.00699	54.5851	59.3239	29.7754	WRKY11		GO:0003700,GO:0043565,GO:0005634,GO:0006355,GO:0003677	DNA-binding transcription factor activity|sequence-specific DNA binding|nucleus|regulation of transcription, DNA-templated|DNA binding
570	TraesCS6D02G357900	25.1359	11.0272	39.2446	3.5589	1.83143	0.0475757	0.2484	Up	0.544506	0.138478	0.830304	0.792544	1.66678	4.23451	At1g16250		GO:0005515	protein binding
571	TraesCS7D02G501700	237.477	104.18	370.773	3.55896	1.83146	0.0457811	0.242733	Up	3.67165	3.98177	3.68685	16.9082	14.6356	7.12226	IGPS		GO:0003824,GO:0006568,GO:0004425	catalytic activity|tryptophan metabolic process|indole-3-glycerol-phosphate synthase activity	ko01230,ko00400	Biosynthesis of amino acids|Phenylalanine, tyrosine and tryptophan biosynthesis
572	TraesCS5B02G194900	243.364	106.73	379.997	3.56035	1.83202	0.0332153	0.198367	Up	3.22433	2.72454	1.81358	10.6594	10.0206	5.49406			GO:0005682	U5 snRNP
573	TraesCS2D02G414600	227.469	99.7577	355.18	3.56043	1.83205	0.0186765	0.137	Up	3.52503	1.94627	2.71832	9.23855	10.951	9.17711	ERF1A		GO:0003700,GO:0006351,GO:0005634,GO:0003677,GO:0006355	DNA-binding transcription factor activity|transcription, DNA-templated|nucleus|DNA binding|regulation of transcription, DNA-templated
574	TraesCS2D02G234800	341.584	149.758	533.409	3.5618	1.83261	0.0300038	0.186289	Up	2.47595	2.04253	2.13797	8.09967	7.10623	4.55092	FTIP7
575	TraesCS7A02G528700	193.339	84.7563	301.922	3.56224	1.83278	0.027311	0.175873	Up	7.48937	2.8611	2.0593	17.854	23.5491	13.5805	ATJ11
576	TraesCS2B02G304300	66.5997	29.1846	104.015	3.56403	1.83351	0.0397715	0.222581	Up	0.749259	0.730559	0.373268	2.82079	0.955954	2.29438
577	TraesCS2B02G452900	237.005	103.846	370.163	3.56453	1.83371	0.0402031	0.223887	Up	7.8224	5.95189	4.71864	27.9759	24.8155	12.0921
578	TraesCS7D02G265500	407.776	178.661	636.89	3.56479	1.83382	0.0192469	0.139738	Up	8.07455	3.63202	3.15762	14.7706	22.4209	15.7299
579	TraesCS6A02G382600	1032.97	452.562	1613.39	3.565	1.8339	0.0290014	0.182561	Up	30.1198	14.7417	21.7215	82.0754	114.674	46.019	SWEET13	Bidirectional sugar transporter SWEET [Source:UniProtKB/TrEMBL;Acc:W5G951]	GO:0016021,GO:0005886,GO:0008643	integral component of membrane|plasma membrane|carbohydrate transport
580	TraesCS2B02G417000	96.9441	42.466	151.422	3.56573	1.8342	0.0290528	0.182713	Up	1.03349	0.38779	0.440762	2.01559	2.70155	1.78468	SBT1.3		GO:0046872,GO:0030001,GO:0006801	metal ion binding|metal ion transport|superoxide metabolic process
581	TraesCS4D02G294100	162.737	71.2728	254.201	3.56658	1.83454	0.0223229	0.15422	Up	1.40196	0.983156	1.1676	3.69023	5.80003	3.52556	Os03g0179900	Lipoxygenase [Source:UniProtKB/TrEMBL;Acc:A0A1D6RZL5]	GO:0046872,GO:0016491,GO:0016702,GO:0055114,GO:0031408,GO:0005515	metal ion binding|oxidoreductase activity|oxidoreductase activity, acting on single donors with incorporation of molecular oxygen, incorporation of two atoms of oxygen|oxidation-reduction process|oxylipin biosynthetic process|protein binding	ko00591,ko00592	Linoleic acid metabolism|alpha-Linolenic acid metabolism
582	TraesCS6B02G297900	700.965	306.953	1094.98	3.56725	1.83481	0.0287987	0.181714	Up	2.91067	3.50953	4.03145	12.5375	14.6437	6.87098	YAK1		GO:0005524,GO:0004672,GO:0006468,GO:0016021	ATP binding|protein kinase activity|protein phosphorylation|integral component of membrane
583	TraesCS7D02G524400	733.359	321.108	1145.61	3.56767	1.83498	0.0177284	0.132533	Up	20.4015	11.6514	10.4421	44.4248	81.1089	46.9233	OPR1		GO:0016491,GO:0003824,GO:0010181,GO:0055114	oxidoreductase activity|catalytic activity|FMN binding|oxidation-reduction process	ko00592	alpha-Linolenic acid metabolism
584	TraesCS1D02G236000	116.751	51.1184	182.384	3.56787	1.83506	0.0315985	0.192073	Up	4.46635	2.49036	1.71209	11.477	12.7429	7.76241			GO:0031146,GO:0005515	SCF-dependent proteasomal ubiquitin-dependent protein catabolic process|protein binding
585	TraesCS7B02G170700	31.9957	14.0085	49.983	3.56806	1.83514	0.0401744	0.223789	Up	1.97118	1.13203	2.17354	5.9852	6.9802	6.78273
586	TraesCS4A02G124100	38.7376	16.9586	60.5167	3.5685	1.83532	0.0227177	0.155841	Up	3.63693	4.02307	0.81754	8.73972	13.6491	14.2002
587	TraesCS3B02G565200	738.536	323.286	1153.79	3.56893	1.83549	0.0237601	0.160658	Up	7.53082	6.83898	10.079	36.7472	29.3264	21.6805	G6PGH1	6-phosphogluconate dehydrogenase, decarboxylating [Source:UniProtKB/TrEMBL;Acc:W5CQC7]	GO:0016491,GO:0055114,GO:0050661,GO:0009737,GO:0004616,GO:0006098,GO:0009651,GO:0019521,GO:0009409,GO:0009414	oxidoreductase activity|oxidation-reduction process|NADP binding|response to abscisic acid|phosphogluconate dehydrogenase (decarboxylating) activity|pentose-phosphate shunt|response to salt stress|D-gluconate metabolic process|response to cold|response to water deprivation	ko01200,ko00480,ko00030	Carbon metabolism|Glutathione metabolism|Pentose phosphate pathway
588	TraesCS4A02G274700	380.846	166.709	594.982	3.56898	1.83551	0.0251181	0.166919	Up	7.92568	7.39624	5.59164	27.3723	30.7931	17.3854
589	TraesCS7A02G122000	179.861	78.7298	280.992	3.56907	1.83555	0.0113085	0.0982261	Up	2.75771	3.36837	4.09837	6.60444	12.2039	14.949	MADS1		GO:0003700,GO:0006351,GO:0005634,GO:0003677,GO:0006355,GO:0046983,GO:0045944,GO:0000977	DNA-binding transcription factor activity|transcription, DNA-templated|nucleus|DNA binding|regulation of transcription, DNA-templated|protein dimerization activity|positive regulation of transcription by RNA polymerase II|RNA polymerase II regulatory region sequence-specific DNA binding
590	TraesCS5D02G145000	44.7717	19.593	69.9504	3.57017	1.83599	0.0480642	0.249673	Up	0.355428	0.35208	0.319204	1.02719	1.58588	0.689906	HESO1
591	TraesCS1B02G363100	264.075	115.551	412.599	3.57071	1.83621	0.0280978	0.179098	Up	4.11378	2.9655	4.15607	15.4053	12.7888	9.17187	At3g47520		GO:0005975,GO:0016491,GO:0003824,GO:0055114,GO:0006099,GO:0016616,GO:0030060	carbohydrate metabolic process|oxidoreductase activity|catalytic activity|oxidation-reduction process|tricarboxylic acid cycle|oxidoreductase activity, acting on the CH-OH group of donors, NAD or NADP as acceptor|L-malate dehydrogenase activity	ko00710,ko01200,ko00630,ko00620,ko00020,ko00270	Carbon fixation in photosynthetic organisms|Carbon metabolism|Glyoxylate and dicarboxylate metabolism|Pyruvate metabolism|Citrate cycle (TCA cycle)|Cysteine and methionine metabolism
592	TraesCS3D02G465600	110.467	48.3278	172.605	3.57155	1.83655	0.0222728	0.153949	Up	1.20042	0.683525	1.02313	3.32758	3.30874	3.2666	THIM		GO:0004417,GO:0009228	hydroxyethylthiazole kinase activity|thiamine biosynthetic process	ko00730	Thiamine metabolism
593	TraesCS5A02G092600	49.3833	21.5955	77.1711	3.57347	1.83733	0.0322682	0.19475	Up	0.649749	0.463936	0.296777	1.13668	2.10483	1.46314	PFK5	ATP-dependent 6-phosphofructokinase [Source:UniProtKB/TrEMBL;Acc:A0A1D5YTS4]	GO:0046872,GO:0005737,GO:0005524,GO:0006096,GO:0006002,GO:0003872	metal ion binding|cytoplasm|ATP binding|glycolytic process|fructose 6-phosphate metabolic process|6-phosphofructokinase activity	ko00680,ko03018,ko00052,ko01200,ko04152,ko01230,ko00030,ko00051,ko00010	Methane metabolism|RNA degradation|Galactose metabolism|Carbon metabolism|AMPK signaling pathway|Biosynthesis of amino acids|Pentose phosphate pathway|Fructose and mannose metabolism|Glycolysis / Gluconeogenesis
594	TraesCS4D02G036200	329.472	144.079	514.865	3.57349	1.83733	0.028082	0.179054	Up	6.63513	6.61188	6.00776	24.5934	28.9481	14.5894
595	TraesCS4B02G112500	35.4005	15.4777	55.3233	3.57439	1.8377	0.0403151	0.224339	Up	0.916783	0.682928	0.622611	2.68903	3.91438	2.69542
596	TraesCS7B02G265500	1155.69	505.232	1806.16	3.5749	1.8379	0.0258176	0.170113	Up	9.93878	8.71226	9.36121	34.2536	35.0471	20.3312			GO:0005524,GO:0015991,GO:0046034,GO:0033180,GO:1902600,GO:0006811	ATP binding|GO_0015991|ATP metabolic process|proton-transporting V-type ATPase, V1 domain|proton transmembrane transport|ion transport	ko04145,ko00190,ko04150	Phagosome|Oxidative phosphorylation|mTOR signaling pathway
597	TraesCS4B02G325100	1656.91	724.252	2589.56	3.5755	1.83814	0.0263728	0.172354	Up	31.878	23.0181	23.0511	101.428	96.6308	60.0225	HIR1	Hypersensitive response protein [Source:UniProtKB/TrEMBL;Acc:A5HE90]
598	TraesCS5D02G443300	50.3882	22.025	78.7514	3.57554	1.83816	0.0466569	0.245459	Up	0.973348	0.283386	0.438734	1.92835	2.66523	1.39682	At2g32040		GO:0016021	integral component of membrane
599	TraesCS6D02G252200	252.504	110.355	394.654	3.57623	1.83844	0.0301274	0.186686	Up	4.02336	2.89858	2.85364	12.1024	12.49	7.7791			GO:0016021	integral component of membrane
600	TraesCS2D02G324700	424.115	185.339	662.89	3.57664	1.8386	0.0135759	0.110902	Up	3.23587	4.47114	13.6037	21.089	38.6984	25.6643	NAC100	RNAC1 transcription factor [Source:UniProtKB/TrEMBL;Acc:A0A1D5UHY0]	GO:0005634,GO:0003677,GO:0006355	nucleus|DNA binding|regulation of transcription, DNA-templated
601	TraesCS7B02G297200	157.863	68.9752	246.751	3.57739	1.83891	0.0190198	0.138728	Up	2.28252	2.13108	1.68704	5.65073	8.35205	7.12495	At1g65240		GO:0004190,GO:0006508	aspartic-type endopeptidase activity|proteolysis
602	TraesCS1A02G240200	100.208	43.7675	156.649	3.57911	1.8396	0.0302639	0.18717	Up	2.84134	2.24529	3.07644	13.2003	13.7926	7.88879
603	TraesCS4B02G133400	1170.95	511.39	1830.5	3.57946	1.83974	0.021358	0.149353	Up	29.9012	22.4329	23.7487	113.699	107.349	69.6295	UBL5		GO:0006464,GO:0005515	cellular protein modification process|protein binding
604	TraesCS5A02G405000	88.9478	38.8356	139.06	3.58073	1.84025	0.0437475	0.235805	Up	2.36216	1.62279	1.50901	7.83036	6.97271	3.54056	PP2A10		GO:0016021	integral component of membrane
605	TraesCS5B02G080200	2596.54	1133.6	4059.48	3.58105	1.84038	0.0267074	0.17359	Up	24.9424	24.3649	21.7952	91.533	88.7181	47.5918			GO:0005515	protein binding
606	TraesCS2A02G292900	349.452	152.561	546.343	3.58115	1.84042	0.0291614	0.183069	Up	4.73862	2.174	2.37978	13.516	11.2564	7.81946	NIN3		GO:0003824,GO:0033926	catalytic activity|glycopeptide alpha-N-acetylgalactosaminidase activity
607	TraesCS5B02G237700	837.217	365.501	1308.93	3.5812	1.84044	0.00934924	0.0864484	Up	45.5693	34.7144	30.1597	138.828	129.259	186.466			GO:0005509	calcium ion binding	ko04015,ko04014,ko04070,ko04024,ko04114,ko04020,ko04022	Rap1 signaling pathway|Ras signaling pathway|Phosphatidylinositol signaling system|cAMP signaling pathway|Oocyte meiosis|Calcium signaling pathway|cGMP-PKG signaling pathway
608	TraesCS1A02G005500	296.073	129.229	462.917	3.58214	1.84082	0.0333035	0.198608	Up	6.29922	4.827	3.82535	20.5853	23.724	10.2437
609	TraesCS3D02G230200	104.831	45.7559	163.906	3.58218	1.84084	0.020541	0.1457	Up	0.409743	1.61588	1.26224	4.59293	5.64589	3.91422	PLIP1		GO:0006629,GO:0019432,GO:0052739,GO:0015908,GO:0009534	lipid metabolic process|triglyceride biosynthetic process|phosphatidylserine 1-acylhydrolase activity|fatty acid transport|chloroplast thylakoid
610	TraesCS2D02G224700	29.1948	12.7405	45.6491	3.58298	1.84116	0.0287554	0.181519	Up	0.659052	0.907639	1.6705	2.97515	5.93449	5.26982	GSTU6		GO:0005515	protein binding
611	TraesCS2A02G042100	242.345	105.743	378.946	3.58366	1.84143	0.0385381	0.218071	Up	2.66894	3.14787	2.495	12.0769	9.14883	5.6218	At5g64460
612	TraesCS7B02G201500	371.449	162.039	580.858	3.58468	1.84184	0.0320809	0.194035	Up	6.03082	5.61494	2.64335	17.4807	15.6176	9.70098	At3g47420		GO:0016021,GO:0022857,GO:0055085	integral component of membrane|transmembrane transporter activity|transmembrane transport
613	TraesCS2A02G505800	1606.14	700.566	2511.71	3.58527	1.84208	0.0259286	0.170578	Up	10.9737	9.45069	8.96748	39.8069	34.2165	23.2203	CPR	NADPH--cytochrome P450 reductase [Source:UniProtKB/TrEMBL;Acc:A0A1D5T886]	GO:0016021,GO:0016491,GO:0010181,GO:0055114,GO:0005789,GO:0050660,GO:0050661,GO:0003958	integral component of membrane|oxidoreductase activity|FMN binding|oxidation-reduction process|endoplasmic reticulum membrane|flavin adenine dinucleotide binding|NADP binding|NADPH-hemoprotein reductase activity
614	TraesCS6B02G074300	174.435	76.0757	272.794	3.58582	1.8423	0.0363106	0.209855	Up	1.60527	1.75707	2.02844	7.1794	6.67444	3.24766	BON3		GO:0005544,GO:0060548	calcium-dependent phospholipid binding|negative regulation of cell death
615	TraesCS7B02G192000	471.086	205.329	736.843	3.5886	1.84342	0.0160269	0.123848	Up	23.3575	18.4926	14.5038	74.4515	91.7702	72.6649	Os06g0320000
616	TraesCS5A02G535000	41.8894	18.2568	65.5221	3.58892	1.84355	0.0408884	0.226085	Up	0.936796	0.65661	0.702219	3.20943	4.20502	1.90064	SCL6
617	TraesCS2B02G174500	277.687	121.014	434.36	3.58933	1.84371	0.0475214	0.248204	Up	5.20487	3.49696	2.89048	15.7133	26.9813	7.05321
618	TraesCS3A02G041700	413.535	180.14	646.93	3.59126	1.84449	0.0194383	0.140638	Up	21.1776	10.7076	7.59623	56.406	70.2168	46.772
619	TraesCS3A02G330600	152.565	66.4531	238.677	3.59167	1.84465	0.0294152	0.184096	Up	0.962974	1.57338	1.37512	4.83841	5.24153	2.95158	Os01g0801600	Glycerol-3-phosphate dehydrogenase [NAD(+)] [Source:UniProtKB/TrEMBL;Acc:A0A1D5V5L9]	GO:0005975,GO:0016491,GO:0051287,GO:0055114,GO:0016616,GO:0009331,GO:0006072,GO:0046168,GO:0004367	carbohydrate metabolic process|oxidoreductase activity|NAD binding|oxidation-reduction process|oxidoreductase activity, acting on the CH-OH group of donors, NAD or NADP as acceptor|glycerol-3-phosphate dehydrogenase complex|glycerol-3-phosphate metabolic process|glycerol-3-phosphate catabolic process|glycerol-3-phosphate dehydrogenase [NAD+] activity	ko00564,ko04011	Glycerophospholipid metabolism|MAPK signaling pathway - yeast
620	TraesCS1B02G267100	431.571	187.919	675.222	3.59315	1.84525	0.023415	0.159175	Up	15.2981	9.96752	11.2154	41.4531	56.2738	32.3878	Os05g0409300	Cysteine proteinase inhibitor [Source:UniProtKB/TrEMBL;Acc:A0A1D5SC35]	GO:0004869	cysteine-type endopeptidase inhibitor activity
621	TraesCS3B02G152200	41.6973	18.1485	65.2461	3.59513	1.84604	0.0291162	0.182925	Up	1.52597	0.609809	0.364089	1.26318	5.73177	3.607	GSTA1		GO:0016740,GO:0004364,GO:0005515	transferase activity|glutathione transferase activity|protein binding	ko00982,ko00480,ko00980	Drug metabolism - cytochrome P450|Glutathione metabolism|Metabolism of xenobiotics by cytochrome P450
622	TraesCS1D02G039000	72.9292	31.7396	114.119	3.59547	1.84618	0.017061	0.129208	Up	0.669425	0.375871	0.867962	2.69667	1.48213	2.44251	CHX20		GO:0016021,GO:0055085,GO:0015299,GO:0006812	integral component of membrane|transmembrane transport|solute:proton antiporter activity|cation transport
623	TraesCS7D02G342900	481.774	209.594	753.953	3.59721	1.84688	0.0169791	0.128808	Up	25.4727	18.6216	28.445	72.7121	112.21	73.4822	ATX1		GO:0046872,GO:0030001	metal ion binding|metal ion transport
624	TraesCS7D02G155100	66.4771	28.9112	104.043	3.59871	1.84748	0.046597	0.245289	Up	2.36296	1.16091	1.11305	6.93255	7.44752	3.33279	MKK5		GO:0005524,GO:0004672,GO:0006468	ATP binding|protein kinase activity|protein phosphorylation
625	TraesCS7D02G359500	1470.72	639.553	2301.88	3.59921	1.84768	0.0289124	0.182173	Up	9.78891	9.25011	10.3213	38.9483	51.1428	18.1095	Os06g0573600	Beta-galactosidase [Source:UniProtKB/TrEMBL;Acc:A0A1D6CMU2]	GO:0004553,GO:0005975,GO:0004565	hydrolase activity, hydrolyzing O-glycosyl compounds|carbohydrate metabolic process|beta-galactosidase activity
626	TraesCS1B02G224600	203.767	88.586	318.948	3.60044	1.84817	0.022465	0.154837	Up	2.49613	2.0736	2.07296	9.39861	6.69258	6.37748	At1g62600	Flavin-containing monooxygenase [Source:UniProtKB/TrEMBL;Acc:A0A341P5M6]	GO:0055114,GO:0004499,GO:0050660,GO:0050661	oxidation-reduction process|N,N-dimethylaniline monooxygenase activity|flavin adenine dinucleotide binding|NADP binding
627	TraesCS3A02G251600	868.87	377.699	1360.04	3.60086	1.84834	0.0308348	0.189513	Up	8.05688	6.29826	6.0003	25.4336	30.76	12.0241	CKL2		GO:0005524,GO:0004672,GO:0004674,GO:0006468	ATP binding|protein kinase activity|protein serine/threonine kinase activity|protein phosphorylation	ko04011,ko04392	MAPK signaling pathway - yeast|Hippo signaling pathway -multiple species
628	TraesCS1B02G196400	270.294	117.494	423.094	3.601	1.8484	0.0429542	0.233273	Up	6.25164	3.7271	3.11095	21.5974	17.3581	9.20595	PP2A13		GO:0005515	protein binding
629	TraesCS4A02G028400	110.232	47.9159	172.547	3.60105	1.84842	0.0471856	0.247016	Up	2.97893	2.6455	2.39398	10.638	13.2927	3.59572
630	TraesCS7D02G399800	94.6758	41.1477	148.204	3.60176	1.8487	0.0372391	0.21327	Up	4.02781	3.57125	4.47114	21.6858	14.5474	9.63804			GO:0016787,GO:0005618	hydrolase activity|cell wall
631	TraesCS1A02G337900	37.3356	16.217	58.4542	3.6045	1.8498	0.0299121	0.186055	Up	0	1.52652	0.331976	2.57029	2.09666	2.43125			GO:0016021	integral component of membrane
632	TraesCS3A02G268000	44.5242	19.3371	69.7112	3.60504	1.85002	0.0302143	0.187021	Up	1.43611	0.996353	1.05955	3.81898	4.62022	4.60236	At1g79260
633	TraesCS1A02G107600	284.381	123.501	445.261	3.60532	1.85013	0.0330943	0.197921	Up	3.9223	3.14792	3.74731	11.8376	13.9013	6.39857	RHG1A
634	TraesCS3A02G279500	71.8702	31.1906	112.55	3.60846	1.85138	0.0184193	0.135785	Up	0.0505637	1.23192	1.73861	2.54669	6.0077	3.78478	RhGT1	Glycosyltransferase [Source:UniProtKB/TrEMBL;Acc:A0A1D5V634]	GO:0016758	transferase activity, transferring hexosyl groups
635	TraesCS6D02G166700	563.321	244.443	882.198	3.60901	1.8516	0.0280713	0.179054	Up	8.70582	7.56378	6.27056	31.5134	27.0897	15.9857	RPT6A		GO:0005737,GO:0005524,GO:0016787,GO:0030163,GO:0000166	cytoplasm|ATP binding|hydrolase activity|protein catabolic process|nucleotide binding	ko03050	Proteasome
636	TraesCS7A02G212200	178.041	77.2457	278.836	3.60973	1.85189	0.0421553	0.230633	Up	3.25587	2.75651	3.56374	15.6612	13.2754	6.5341	AVT6A		GO:0016021	integral component of membrane
637	TraesCS7B02G214400	95.4501	41.3999	149.5	3.61112	1.85245	0.0287053	0.181411	Up	1.05997	0.658755	1.28907	4.22648	3.16251	2.85528	Os08g0121900		GO:0016021	integral component of membrane
638	TraesCS2A02G065100	505.571	219.279	791.862	3.6112	1.85248	0.0283902	0.180178	Up	4.46872	3.55533	3.41904	14.4083	13.5155	7.72749	ceg1		GO:0005634,GO:0008138,GO:0004725,GO:0016791,GO:0016311,GO:0004484,GO:0004651,GO:0006370,GO:0006470	nucleus|protein tyrosine/serine/threonine phosphatase activity|protein tyrosine phosphatase activity|phosphatase activity|dephosphorylation|mRNA guanylyltransferase activity|polynucleotide 5'-phosphatase activity|7-methylguanosine mRNA capping|protein dephosphorylation	ko03015	mRNA surveillance pathway
639	TraesCS7A02G245100	391.939	169.97	613.907	3.61185	1.85274	0.0207928	0.146784	Up	19.7321	11.5473	12.3368	62.5218	68.5367	43.7428	SAP11		GO:0003677,GO:0008270	DNA binding|zinc ion binding
640	TraesCS2B02G095500	114.285	49.5552	179.015	3.61244	1.85297	0.0327475	0.196641	Up	0.446712	0.439911	0.780989	2.07941	2.19225	1.15575	NET2A		GO:0003779	actin binding
641	TraesCS5D02G531600	133.7	57.9444	209.456	3.61478	1.85391	0.0268432	0.173952	Up	1.57398	1.03231	1.18512	3.77956	5.24974	3.03191	ALB4		GO:0016021,GO:0032977,GO:0009535,GO:0072598,GO:0009658	integral component of membrane|membrane insertase activity|chloroplast thylakoid membrane|protein localization to chloroplast|chloroplast organization	ko02024,ko03070,ko03060	Quorum sensing|Bacterial secretion system|Protein export
642	TraesCS5B02G286000	31.0616	13.4576	48.6657	3.61623	1.85449	0.026474	0.172734	Up	0.325183	0.263406	0.775509	1.67726	1.67587	2.23105	TGA1		GO:0046872,GO:0005634,GO:0003677	metal ion binding|nucleus|DNA binding
643	TraesCS7D02G432800	1079.11	467.481	1690.74	3.6167	1.85467	0.0422678	0.231081	Up	20.0379	20.1612	24.9368	65.0114	176.875	57.5796	BX6		GO:0016491,GO:0055114	oxidoreductase activity|oxidation-reduction process
644	TraesCS6D02G312800	167.31	72.462	262.158	3.61786	1.85514	0.0351585	0.205584	Up	2.45724	2.25342	2.3869	9.55921	12.6712	3.87976	BZIP23		GO:0003700,GO:0006355,GO:0009414,GO:0009651,GO:0009738,GO:0005634	DNA-binding transcription factor activity|regulation of transcription, DNA-templated|response to water deprivation|response to salt stress|abscisic acid-activated signaling pathway|nucleus	ko04075	Plant hormone signal transduction
645	TraesCS7A02G402500	166.048	71.9088	260.187	3.61829	1.85531	0.0188699	0.138087	Up	3.87779	2.36951	2.38887	8.46509	8.84254	9.52767	Os06g0617800		GO:0000287,GO:0004749,GO:0009116,GO:0009156,GO:0009165,GO:0044249	magnesium ion binding|ribose phosphate diphosphokinase activity|nucleoside metabolic process|ribonucleoside monophosphate biosynthetic process|nucleotide biosynthetic process|cellular biosynthetic process	ko00230,ko01230,ko00030,ko01200	Purine metabolism|Biosynthesis of amino acids|Pentose phosphate pathway|Carbon metabolism
646	TraesCS6D02G263600	71.7111	31.0492	112.373	3.6192	1.85567	0.0311993	0.190714	Up	2.30053	0.350582	2.51033	6.24907	9.8259	5.69223
647	TraesCS4D02G066400	272.368	117.924	426.811	3.61936	1.85574	0.0239697	0.161511	Up	4.21643	4.02108	5.07734	26.1363	28.0945	11.4585
648	TraesCS2D02G464300	574.866	248.861	900.871	3.61998	1.85598	0.0326086	0.196085	Up	3.69194	3.79069	4.17149	14.5197	17.0073	6.93921	sec27		GO:0005515	protein binding
649	TraesCS6A02G165800	43.6394	18.8896	68.3893	3.62048	1.85618	0.0239642	0.161502	Up	0.328519	0.243139	0.537794	0.783342	1.50705	1.25171	TGA10		GO:0003700,GO:0006351,GO:0043565,GO:0006355	DNA-binding transcription factor activity|transcription, DNA-templated|sequence-specific DNA binding|regulation of transcription, DNA-templated	ko04075	Plant hormone signal transduction
650	TraesCS6A02G254200	105.588	45.6864	165.489	3.62229	1.8569	0.0420826	0.230413	Up	3.64693	1.72713	1.19584	9.59691	10.5521	4.29257
651	TraesCS6A02G362500	48.9208	21.1655	76.676	3.62269	1.85706	0.0303433	0.187531	Up	0.426662	0.578473	0.538534	1.82721	1.52416	1.77495
652	TraesCS3A02G250100	39.5967	17.1243	62.0691	3.62461	1.85783	0.0361215	0.209086	Up	0.595641	1.43645	0.480934	2.86074	3.31233	2.59815	RTE1
653	TraesCS2D02G277600	47.7502	20.6496	74.8509	3.62481	1.85791	0.0287045	0.181411	Up	0.657518	0.571359	0.683913	2.85279	1.8727	2.81074	DTX16	Protein DETOXIFICATION [Source:UniProtKB/TrEMBL;Acc:A0A1D5ULF3]	GO:0016021,GO:0016020,GO:0055085,GO:0015238,GO:0015297,GO:0006855,GO:0042910,GO:0042908	integral component of membrane|membrane|transmembrane transport|GO_0015238|antiporter activity|drug transmembrane transport|xenobiotic transmembrane transporter activity|xenobiotic transport
654	TraesCS3B02G266100	815.034	352.326	1277.74	3.62658	1.85861	0.0245304	0.164035	Up	7.68478	7.0134	5.96137	24.6244	28.0406	15.0862	LACS4		GO:0003824	catalytic activity	ko00071,ko00061,ko04146,ko02024,ko01212	Fatty acid degradation|Fatty acid biosynthesis|Peroxisome|Quorum sensing|Fatty acid metabolism
655	TraesCS4D02G211300	378.805	163.743	593.868	3.62683	1.85871	0.0483361	0.25064	Up	5.00848	3.30044	2.09776	15.2102	12.8708	6.87943	ATG1C		GO:0005524,GO:0004672,GO:0006468	ATP binding|protein kinase activity|protein phosphorylation
656	TraesCS6A02G305400	257.129	111.131	403.127	3.62748	1.85897	0.014498	0.115832	Up	5.21664	3.1201	5.70018	18.3578	14.3138	19.1328	SK1				ko01230,ko00400	Biosynthesis of amino acids|Phenylalanine, tyrosine and tryptophan biosynthesis
657	TraesCS3A02G237700	723.872	312.809	1134.93	3.6282	1.85926	0.0249387	0.166112	Up	4.7897	3.67858	3.9725	14.2227	17.3271	9.23229	LACS4		GO:0003824	catalytic activity	ko00071,ko00061,ko04146,ko02024,ko01212	Fatty acid degradation|Fatty acid biosynthesis|Peroxisome|Quorum sensing|Fatty acid metabolism
658	TraesCS2A02G031000	123.196	53.2355	193.157	3.62836	1.85932	0.0356534	0.207368	Up	0.959479	1.02624	0.814844	3.57594	3.55542	1.78861	RGA1		GO:0043531	ADP binding
659	TraesCS2B02G465400	57.9205	25.0226	90.8185	3.62946	1.85976	0.0390001	0.219615	Up	1.42931	1.27959	0.74807	5.37195	3.70595	3.1951	AE7		GO:0106035	protein maturation by [4Fe-4S] cluster transfer
660	TraesCS5D02G444200	119.265	51.5102	187.021	3.63075	1.86027	0.0351432	0.20554	Up	4.56022	2.09133	3.02187	16.301	19.9817	7.69593	HIDM		GO:0016787	hydrolase activity
661	TraesCS2A02G249400	266.238	114.924	417.552	3.63328	1.86127	0.0302188	0.187021	Up	5.42098	4.58202	5.95591	24.4798	25.9547	11.4322			GO:0016020,GO:0008375	membrane|acetylglucosaminyltransferase activity
662	TraesCS2D02G493600	1038.59	448.302	1628.88	3.63344	1.86133	0.0488335	0.252124	Up	18.8925	11.0992	12.2169	67.1859	51.4334	28.448	SHM4	Serine hydroxymethyltransferase [Source:UniProtKB/TrEMBL;Acc:A0A1D5UPW5]	GO:0030170,GO:0003824,GO:0019264,GO:0004372,GO:0035999,GO:0016740,GO:0006730	pyridoxal phosphate binding|catalytic activity|glycine biosynthetic process from serine|glycine hydroxymethyltransferase activity|tetrahydrofolate interconversion|transferase activity|one-carbon metabolic process	ko00260,ko00680,ko01200,ko00630,ko00460,ko00670,ko01230	Glycine, serine and threonine metabolism|Methane metabolism|Carbon metabolism|Glyoxylate and dicarboxylate metabolism|Cyanoamino acid metabolism|One carbon pool by folate|Biosynthesis of amino acids
663	TraesCS6D02G090700	501.702	216.53	786.875	3.63402	1.86157	0.0262918	0.172077	Up	4.78625	4.56819	5.4938	22.8279	24.5046	11.2607			GO:0016757	transferase activity, transferring glycosyl groups
664	TraesCS2A02G157800	722.577	311.771	1133.38	3.63531	1.86208	0.0232132	0.158222	Up	14.9038	12.6746	10.9267	44.6338	52.2431	27.6131	BHLH062		GO:0046983	protein dimerization activity
665	TraesCS4A02G247400	470.355	202.903	737.806	3.63625	1.86245	0.037872	0.215584	Up	13.0243	15.0223	13.4357	84.7506	65.7415	35.6485
666	TraesCS6B02G252500	33.5716	14.4789	52.6643	3.63731	1.86287	0.0314069	0.191475	Up	0.850217	0.368785	0.308688	1.27288	2.56124	1.9579
667	TraesCS3B02G039700	300.194	129.469	470.919	3.63732	1.86288	0.0129473	0.107196	Up	6.20829	4.06454	4.66404	13.6089	22.3491	18.6668	ENDO2		GO:0003676,GO:0016788,GO:0004519,GO:0006308,GO:0090305	nucleic acid binding|hydrolase activity, acting on ester bonds|endonuclease activity|DNA catabolic process|nucleic acid phosphodiester bond hydrolysis
668	TraesCS3D02G375000	207.46	89.4474	325.473	3.63871	1.86343	0.0480421	0.249583	Up	3.17591	1.32957	2.4384	10.1372	8.1774	4.55176	Os01g0871200		GO:0003700,GO:0005634,GO:0003676,GO:0010447,GO:0010044,GO:0006355,GO:0043565	DNA-binding transcription factor activity|nucleus|nucleic acid binding|response to acidic pH|response to aluminum ion|regulation of transcription, DNA-templated|sequence-specific DNA binding
669	TraesCS4B02G181900	252.555	108.879	396.231	3.63918	1.86361	0.026247	0.171953	Up	3.30445	4.3491	6.53211	19.5219	27.104	10.2465
670	TraesCS1B02G446400	18.787	8.09899	29.4749	3.63933	1.86367	0.0487188	0.251773	Up	1.26207	0.281088	0.758394	2.34163	3.47332	3.44243	CML14		GO:0005509	calcium ion binding
671	TraesCS2B02G281000	230.189	99.1975	361.18	3.64102	1.86434	0.0295272	0.184552	Up	5.20824	2.1827	4.49677	17.7316	12.9619	8.51474	MADS15		GO:0003700,GO:0006351,GO:0005634,GO:0003677,GO:0006355,GO:0046983,GO:0045944,GO:0000977	DNA-binding transcription factor activity|transcription, DNA-templated|nucleus|DNA binding|regulation of transcription, DNA-templated|protein dimerization activity|positive regulation of transcription by RNA polymerase II|RNA polymerase II regulatory region sequence-specific DNA binding
672	TraesCS2A02G291700	118.627	51.1098	186.144	3.64204	1.86475	0.0318556	0.193152	Up	2.09879	1.35823	0.664058	6.23398	4.38837	3.46782	ASIL2		GO:0005737,GO:0006221,GO:0009041,GO:0033862	cytoplasm|pyrimidine nucleotide biosynthetic process|uridylate kinase activity|UMP kinase activity
673	TraesCS1B02G291700	216.093	93.0959	339.09	3.64238	1.86488	0.0249622	0.166172	Up	15.4827	8.23231	4.44685	28.6449	50.8574	23.775
674	TraesCS3D02G204000	261.615	112.682	410.547	3.64341	1.86529	0.0194825	0.140748	Up	9.6576	6.58737	8.73556	27.9399	26.4649	24.5583	VHA-F	V-type proton ATPase subunit F [Source:UniProtKB/TrEMBL;Acc:B2B9T8]	GO:0015991,GO:0033180,GO:0046961,GO:0006811,GO:1902600,GO:0034220	GO_0015991|proton-transporting V-type ATPase, V1 domain|proton-transporting ATPase activity, rotational mechanism|ion transport|proton transmembrane transport|ion transmembrane transport	ko04145,ko00190,ko04150	Phagosome|Oxidative phosphorylation|mTOR signaling pathway
675	TraesCS4A02G053700	294.528	126.829	462.228	3.6445	1.86572	0.0298769	0.185948	Up	2.23635	1.53513	2.23226	7.53759	7.35337	3.84498			GO:0005516	calmodulin binding
676	TraesCS5D02G112200	52.3803	22.5465	82.2142	3.64643	1.86648	0.0348174	0.204321	Up	0.603245	0.298326	1.24355	1.7206	3.11734	1.64466	FBL14
677	TraesCS6D02G348500	134.498	57.8927	211.103	3.64645	1.86649	0.034281	0.202195	Up	3.17548	1.89634	2.4339	10.1889	11.236	5.19929	RLF		GO:0046872,GO:0020037	metal ion binding|heme binding
678	TraesCS4A02G357200	932.619	401.414	1463.82	3.64666	1.86658	0.0408007	0.225774	Up	12.3417	11.1799	11.5994	51.2315	52.0439	22.3904	ETFA		GO:0005507,GO:0009055,GO:0050660,GO:0005739	copper ion binding|electron transfer activity|flavin adenine dinucleotide binding|mitochondrion
679	TraesCS6B02G282100	97.0508	41.7715	152.33	3.64675	1.86661	0.0140365	0.113481	Up	2.2784	1.24869	0.931636	4.78785	4.98039	7.02751	At4g17550		GO:0016021,GO:0022857,GO:0055085,GO:0005774,GO:0055062	integral component of membrane|transmembrane transporter activity|transmembrane transport|vacuolar membrane|phosphate ion homeostasis
680	TraesCS7D02G263900	273.851	117.8	429.902	3.64941	1.86766	0.0281438	0.179225	Up	4.54081	3.93635	4.23583	16.5918	15.7981	9.45131	Os08g0536000	Pyruvate dehydrogenase E1 component subunit beta [Source:UniProtKB/TrEMBL;Acc:A0A1D6DE75]	GO:0003824,GO:0006096,GO:0004739,GO:0006086,GO:0005759	catalytic activity|glycolytic process|pyruvate dehydrogenase (acetyl-transferring) activity|acetyl-CoA biosynthetic process from pyruvate|mitochondrial matrix	ko04066,ko01200,ko00620,ko00020,ko00010	HIF-1 signaling pathway|Carbon metabolism|Pyruvate metabolism|Citrate cycle (TCA cycle)|Glycolysis / Gluconeogenesis
681	TraesCS1B02G271700	853.665	367.207	1340.12	3.64951	1.8677	0.0141058	0.113708	Up	10.4315	9.86584	9.46219	32.0897	35.5304	32.6694	GDI1	Guanosine nucleotide diphosphate dissociation inhibitor [Source:UniProtKB/TrEMBL;Acc:A0A1D5SSE7]	GO:0005622,GO:0015031,GO:0005092,GO:0007264,GO:0005093,GO:0050790	intracellular|protein transport|GDP-dissociation inhibitor activity|small GTPase mediated signal transduction|Rab GDP-dissociation inhibitor activity|regulation of catalytic activity
682	TraesCS7B02G294200	27.4353	11.8014	43.0693	3.64952	1.86771	0.0399076	0.22283	Up	0.455759	0.882167	1.99414	4.41759	6.06884	4.31524	GDU4		GO:0080143	regulation of amino acid export
683	TraesCS7B02G434400	367.611	158.116	577.105	3.64988	1.86785	0.0151479	0.119299	Up	5.01884	4.50301	5.3851	19.1579	23.1893	17.9048	ADIPOR1		GO:0016021,GO:0009725,GO:0009651,GO:0009744,GO:0009788	integral component of membrane|response to hormone|response to salt stress|response to sucrose|negative regulation of abscisic acid-activated signaling pathway	ko04152	AMPK signaling pathway
684	TraesCS3B02G360600	119.015	51.187	186.843	3.65021	1.86798	0.0316424	0.192281	Up	1.13513	1.07017	1.29722	5.00862	4.5171	2.68534	Os01g0801600	Glycerol-3-phosphate dehydrogenase [NAD(+)] [Source:UniProtKB/TrEMBL;Acc:A0A1D5VXN5]	GO:0005975,GO:0016491,GO:0051287,GO:0055114,GO:0016616,GO:0009331,GO:0006072,GO:0046168,GO:0004367	carbohydrate metabolic process|oxidoreductase activity|NAD binding|oxidation-reduction process|oxidoreductase activity, acting on the CH-OH group of donors, NAD or NADP as acceptor|glycerol-3-phosphate dehydrogenase complex|glycerol-3-phosphate metabolic process|glycerol-3-phosphate catabolic process|glycerol-3-phosphate dehydrogenase [NAD+] activity	ko00564,ko04011	Glycerophospholipid metabolism|MAPK signaling pathway - yeast
685	TraesCS1B02G150500	571.111	245.582	896.64	3.65109	1.86833	0.0423379	0.231244	Up	0.396632	2.57329	3.40451	8.51445	7.52331	4.25581	SPBC29A10.10c
686	TraesCS7D02G128300	351.288	151.048	551.527	3.65135	1.86843	0.0257853	0.169984	Up	4.59588	5.64457	4.49623	19.017	22.3247	10.658	At3g15890		GO:0005524,GO:0004672,GO:0006468	ATP binding|protein kinase activity|protein phosphorylation
687	TraesCS2A02G190900	336.923	144.849	528.996	3.65206	1.86871	0.0208138	0.146866	Up	6.47489	4.30765	3.1985	17.3715	24.3372	13.131
688	TraesCS4D02G185400	426.335	183.277	669.393	3.65236	1.86883	0.0379502	0.215889	Up	22.6353	14.2847	17.4175	87.7781	79.6693	36.9585	CP12-1
689	TraesCS7B02G392600	1421.68	611.153	2232.2	3.65244	1.86886	0.0254856	0.168689	Up	13.4886	10.7391	14.8638	52.1509	56.6735	27.3062			GO:0005524,GO:0015991,GO:0005886,GO:0005794,GO:0046034,GO:0033180,GO:0005618,GO:0048046,GO:0005774,GO:0046961,GO:1902600,GO:0009651,GO:0007030,GO:0000325,GO:0009555,GO:0009506,GO:0009941,GO:0002020	ATP binding|GO_0015991|plasma membrane|Golgi apparatus|ATP metabolic process|proton-transporting V-type ATPase, V1 domain|cell wall|apoplast|vacuolar membrane|proton-transporting ATPase activity, rotational mechanism|proton transmembrane transport|response to salt stress|Golgi organization|plant-type vacuole|pollen development|plasmodesma|chloroplast envelope|protease binding	ko04145,ko00190,ko04150	Phagosome|Oxidative phosphorylation|mTOR signaling pathway
690	TraesCS1D02G275800	267.529	114.986	420.072	3.65324	1.86918	0.0131656	0.108554	Up	6.77336	5.65926	6.6081	23.2998	20.423	24.4029	FDX6	Ferredoxin [Source:UniProtKB/TrEMBL;Acc:A0A1D5SYP6]	GO:0009055,GO:0051537,GO:0051536,GO:0022900,GO:0046872,GO:0009507	electron transfer activity|2 iron, 2 sulfur cluster binding|iron-sulfur cluster binding|electron transport chain|metal ion binding|chloroplast	ko00195	Photosynthesis
691	TraesCS1B02G131300	554.278	238.21	870.345	3.6537	1.86936	0.0171648	0.1297	Up	2.45254	6.4998	9.36542	25.5589	22.9298	18.7382	FLBR	Dihydrolipoyl dehydrogenase [Source:UniProtKB/TrEMBL;Acc:W5A874]	GO:0016491,GO:0009055,GO:0045454,GO:0055114,GO:0050660,GO:0004148,GO:0005623,GO:0016668,GO:0000166,GO:0022900	oxidoreductase activity|electron transfer activity|cell redox homeostasis|oxidation-reduction process|flavin adenine dinucleotide binding|dihydrolipoyl dehydrogenase activity|cell|oxidoreductase activity, acting on a sulfur group of donors, NAD(P) as acceptor|nucleotide binding|electron transport chain	ko00260,ko01200,ko00630,ko00620,ko00020,ko00280,ko00640,ko00010	Glycine, serine and threonine metabolism|Carbon metabolism|Glyoxylate and dicarboxylate metabolism|Pyruvate metabolism|Citrate cycle (TCA cycle)|Valine, leucine and isoleucine degradation|Propanoate metabolism|Glycolysis / Gluconeogenesis
692	TraesCS1B02G243700	200.699	86.2528	315.146	3.65374	1.86938	0.0174214	0.131046	Up	3.07238	2.8727	2.36114	8.80303	12.8382	9.69764	CSE
693	TraesCS7A02G129300	129.191	55.5212	202.861	3.65376	1.86938	0.0326438	0.196208	Up	1.61137	1.99239	1.87027	7.53092	7.76546	3.54357	At3g15890		GO:0005524,GO:0004672,GO:0006468	ATP binding|protein kinase activity|protein phosphorylation
694	TraesCS2A02G318800	1819.17	781.757	2856.58	3.65405	1.8695	0.021022	0.147725	Up	49.3612	38.3257	13.3054	120.08	156.867	86.3987
695	TraesCS3A02G409200	342.168	147.017	537.32	3.65482	1.8698	0.0230111	0.157296	Up	3.51055	3.15028	2.87226	9.49278	16.3842	7.21625	GUX1	Hexosyltransferase [Source:UniProtKB/TrEMBL;Acc:A0A1D5VEI1]	GO:0016021,GO:0016757	integral component of membrane|transferase activity, transferring glycosyl groups
696	TraesCS2A02G041100	487.611	209.475	765.747	3.65555	1.87009	0.0229787	0.157174	Up	5.08566	4.71739	7.12289	21.1895	21.5413	13.3049	At4g26910		GO:0016746,GO:0006099,GO:0004149,GO:0045252	transferase activity, transferring acyl groups|tricarboxylic acid cycle|dihydrolipoyllysine-residue succinyltransferase activity|oxoglutarate dehydrogenase complex	ko00020,ko01200,ko00310	Citrate cycle (TCA cycle)|Carbon metabolism|Lysine degradation
697	TraesCS5D02G455700	421.837	181.162	662.512	3.65702	1.87067	0.0229189	0.156845	Up	26.0008	9.72065	6.8068	75.8951	71.1106	30.9352
698	TraesCS3D02G531400	88.7357	38.086	139.385	3.65975	1.87175	0.031272	0.190987	Up	1.89189	1.85511	1.70638	5.71127	8.36523	3.83828
699	TraesCS5B02G448300	52.0942	22.3571	81.8313	3.66019	1.87192	0.0462759	0.244321	Up	0.932305	1.35037	1.628	7.6023	6.0192	3.85336
700	TraesCS1D02G047900	1539.97	660.663	2419.28	3.66189	1.87259	0.0216724	0.150867	Up	9.57184	9.32658	10.8047	43.5755	42.4397	25.5418	ECA4		GO:0016021,GO:0005524,GO:0016787,GO:0000166	integral component of membrane|ATP binding|hydrolase activity|nucleotide binding
701	TraesCS1B02G209700	193.965	83.191	304.74	3.66313	1.87308	0.0374045	0.213847	Up	3.36741	2.42	2.50701	5.75	19.583	8.5858	TKPR1
702	TraesCS6A02G314000	329.57	141.334	517.806	3.6637	1.8733	0.019245	0.139738	Up	3.57579	3.50888	5.86618	15.9531	14.6244	12.8308	PHOS34
703	TraesCS6A02G360900	615.394	263.838	966.951	3.66495	1.87379	0.0370402	0.212584	Up	14.1109	9.42468	14.1465	57.2788	63.3641	23.7414
704	TraesCS6D02G205200	127.91	54.8265	200.993	3.66598	1.8742	0.0215256	0.150197	Up	4.65799	2.01201	3.02339	10.8352	13.8794	10.4209
705	TraesCS7D02G305600	90.0519	38.5878	141.516	3.66738	1.87475	0.0225745	0.155231	Up	1.00273	1.23332	0.852287	4.86626	4.83021	3.89892	RGLG4		GO:0004842,GO:0005737,GO:0005634,GO:0009611,GO:0042742,GO:0009867	ubiquitin-protein transferase activity|cytoplasm|nucleus|response to wounding|defense response to bacterium|jasmonic acid mediated signaling pathway
706	TraesCS2B02G419400	314.923	134.922	494.924	3.66822	1.87508	0.0228901	0.156702	Up	8.36315	5.0804	5.77446	26.432	24.9989	17.4258	At1g12760		GO:0016021,GO:0016020	integral component of membrane|membrane
707	TraesCS2B02G234800	41.7913	17.8993	65.6833	3.66961	1.87563	0.0287669	0.181557	Up	0.614067	0.860813	0.925707	0.630487	3.57903	6.89015	CYCD6-1		GO:0005634,GO:0051726	nucleus|regulation of cell cycle
708	TraesCS3D02G298600	368.993	158.034	579.952	3.66979	1.8757	0.0346322	0.2036	Up	7.67742	4.80797	1.72209	22.7642	22.5555	9.61531	UAM1		GO:0016866,GO:0071669	intramolecular transferase activity|plant-type cell wall organization or biogenesis	ko00520	Amino sugar and nucleotide sugar metabolism
709	TraesCS3A02G056100	378.098	161.895	594.301	3.67091	1.87614	0.0237505	0.160636	Up	5.72865	3.86168	3.4534	21.715	17.6652	11.4823	DIVARICATA		GO:0005634,GO:0003677	nucleus|DNA binding
710	TraesCS5D02G109600	144.677	61.9405	227.413	3.67148	1.87636	0.0253304	0.167912	Up	2.10711	0.832345	1.41012	4.91042	5.54866	3.81673	VIL1	PHD finger protein [Source:UniProtKB/TrEMBL;Acc:U6C7W3]	GO:0005515	protein binding
711	TraesCS6D02G224000	105.617	45.2159	166.018	3.67167	1.87644	0.0199482	0.143003	Up	2.22693	1.00276	1.19454	5.3265	5.85278	5.43218
712	TraesCS5A02G227700	573.479	245.473	901.485	3.67244	1.87674	0.0297289	0.18535	Up	1.9543	2.15099	3.02969	11.3288	10.9344	5.02984			GO:0016021,GO:0003735,GO:0006412,GO:0005840	integral component of membrane|structural constituent of ribosome|translation|ribosome
713	TraesCS5B02G239300	66.1414	28.307	103.976	3.67314	1.87701	0.0267591	0.17366	Up	0.775117	1.47486	1.3441	5.97167	5.67319	4.06561	TCEA1		GO:0016787	hydrolase activity
714	TraesCS5D02G432800	129.729	55.5128	203.946	3.67386	1.8773	0.0242138	0.162527	Up	1.7126	1.90227	2.00341	5.35112	9.22477	5.12705	PEX13		GO:0016021,GO:0005777,GO:0016560	integral component of membrane|peroxisome|protein import into peroxisome matrix, docking	ko01200,ko00630,ko04146	Carbon metabolism|Glyoxylate and dicarboxylate metabolism|Peroxisome
715	TraesCS7A02G082500	55.5439	23.7618	87.326	3.67505	1.87777	0.0364903	0.210514	Up	0	2.76628	1.34268	5.97247	6.60442	2.92382	APS1		GO:0003993	acid phosphatase activity
716	TraesCS4B02G267400	215.222	92.0677	338.375	3.67529	1.87786	0.028025	0.178833	Up	2.65278	1.63829	1.37458	8.33242	8.71537	4.82874	BIPP2C1		GO:0003824	catalytic activity
717	TraesCS7A02G034300	196.884	84.2155	309.553	3.67572	1.87803	0.014875	0.117787	Up	6.57569	1.31826	2.73687	11.0956	14.7228	13.8841	GSTU6		GO:0005515	protein binding	ko00982,ko00480,ko00980	Drug metabolism - cytochrome P450|Glutathione metabolism|Metabolism of xenobiotics by cytochrome P450
718	TraesCS3D02G213000	575.153	245.926	904.379	3.67744	1.8787	0.0388606	0.219137	Up	3.67788	4.13387	3.92596	17.5125	16.5364	7.30867	NRG2		GO:0071249	cellular response to nitrate
719	TraesCS7B02G278800	449.336	192.096	706.576	3.67825	1.87902	0.0253015	0.167775	Up	6.59125	4.22577	3.32314	21.4126	19.5445	11.6281	EBF1		GO:0005515	protein binding	ko04075	Plant hormone signal transduction
720	TraesCS3A02G341000	1529.96	653.507	2406.41	3.6823	1.88061	0.0170763	0.129288	Up	11.1115	12.2431	21.0501	57.9523	58.0488	41.7322			GO:0046872,GO:0005737,GO:0003824,GO:0030145,GO:0004619,GO:0006007	metal ion binding|cytoplasm|catalytic activity|manganese ion binding|phosphoglycerate mutase activity|glucose catabolic process	ko00260,ko01200,ko00680,ko01230,ko00010	Glycine, serine and threonine metabolism|Carbon metabolism|Methane metabolism|Biosynthesis of amino acids|Glycolysis / Gluconeogenesis
721	TraesCS2A02G298600	80.7268	34.4761	126.978	3.68306	1.8809	0.0393019	0.220833	Up	2.8651	1.31974	1.08772	6.89801	11.9836	3.70608	PUB27	RING-type E3 ubiquitin transferase [Source:UniProtKB/TrEMBL;Acc:A0A1D5TFD9]	GO:0004842,GO:0016567	ubiquitin-protein transferase activity|protein ubiquitination
722	TraesCS4D02G052400	615.165	262.616	967.714	3.6849	1.88163	0.0247962	0.165356	Up	7.12769	6.07919	5.30461	22.3239	29.675	12.6049	NPF8.3		GO:0006857,GO:0022857,GO:0016020,GO:0055085,GO:0005215,GO:0016021	oligopeptide transport|transmembrane transporter activity|membrane|transmembrane transport|transporter activity|integral component of membrane
723	TraesCS1B02G213800	101.577	43.3629	159.791	3.68496	1.88165	0.0186894	0.137054	Up	4.82491	2.04185	3.06146	10.4815	12.9396	12.0418	Os05g0344400	CASP-like protein [Source:UniProtKB/TrEMBL;Acc:W5A6H3]	GO:0016021,GO:0005886	integral component of membrane|plasma membrane
724	TraesCS4D02G094500	991.975	423.404	1560.55	3.68571	1.88194	0.0129213	0.107102	Up	14.6256	11.1295	9.7341	41.9325	43.5221	42.5365	ALDH3I1	Aldehyde dehydrogenase [Source:UniProtKB/TrEMBL;Acc:W5ES52]	GO:0016491,GO:0006081,GO:0016620,GO:0055114	oxidoreductase activity|cellular aldehyde metabolic process|oxidoreductase activity, acting on the aldehyde or oxo group of donors, NAD or NADP as acceptor|oxidation-reduction process	ko00561,ko00071,ko00380,ko00310,ko00040,ko00410,ko00340,ko00620,ko00330,ko00903,ko00280,ko00625,ko00053,ko00010	Glycerolipid metabolism|Fatty acid degradation|Tryptophan metabolism|Lysine degradation|Pentose and glucuronate interconversions|beta-Alanine metabolism|Histidine metabolism|Pyruvate metabolism|Arginine and proline metabolism|Limonene and pinene degradation|Valine, leucine and isoleucine degradation|Chloroalkane and chloroalkene degradation|Ascorbate and aldarate metabolism|Glycolysis / Gluconeog…
725	TraesCS5B02G361100	97.437	41.5754	153.299	3.68725	1.88254	0.0212282	0.148762	Up	1.48709	1.29979	1.92479	7.02711	6.14919	5.55454	PUP5		GO:0016021,GO:0005215	integral component of membrane|transporter activity
726	TraesCS5D02G331600	231.04	98.5266	363.553	3.6899	1.88358	0.0256699	0.169489	Up	3.11051	2.61832	2.99743	14.7539	12.7109	7.35745	BBR
727	TraesCS1A02G215500	425.844	181.594	670.095	3.69007	1.88365	0.0459828	0.243399	Up	6.98098	6.7193	4.12681	18.1364	46.0105	13.7997	BAM3	Beta-amylase [Source:UniProtKB/TrEMBL;Acc:A0A1D5RW46]	GO:0000272,GO:0016161,GO:0005983,GO:0000024,GO:0009409,GO:0102229,GO:0009570	polysaccharide catabolic process|beta-amylase activity|starch catabolic process|maltose biosynthetic process|response to cold|amylopectin maltohydrolase activity|chloroplast stroma	ko00500	Starch and sucrose metabolism
728	TraesCS4D02G197900	367.854	156.838	578.87	3.69088	1.88397	0.0119668	0.101944	Up	5.3404	3.87091	6.25559	14.7602	18.5668	19.0422	iqw1		GO:0005515	protein binding
729	TraesCS4D02G142900	63.3254	26.9966	99.6542	3.69136	1.88415	0.0373158	0.213477	Up	0.826137	1.36138	1.34298	5.29793	5.94586	2.61169	JAMYB		GO:0003677	DNA binding
730	TraesCS2A02G523400	367.297	156.549	578.045	3.69242	1.88457	0.0162528	0.12505	Up	4.10604	3.59334	4.7674	17.9236	12.0544	14.8421	SK3				ko01230,ko00400	Biosynthesis of amino acids|Phenylalanine, tyrosine and tryptophan biosynthesis
731	TraesCS2D02G571300	117.875	50.2014	185.549	3.69609	1.886	0.0445994	0.238711	Up	0.579277	0.480446	0.30245	1.70902	2.21029	0.744973	FAB1D		GO:0005524,GO:0016307,GO:0000166,GO:0016301,GO:0016310,GO:0016740,GO:0046488,GO:0046854	ATP binding|phosphatidylinositol phosphate kinase activity|nucleotide binding|kinase activity|phosphorylation|transferase activity|phosphatidylinositol metabolic process|phosphatidylinositol phosphorylation	ko00562,ko04810,ko04070,ko04145	Inositol phosphate metabolism|Regulation of actin cytoskeleton|Phosphatidylinositol signaling system|Phagosome
732	TraesCS2D02G429700	119.656	50.9426	188.37	3.6977	1.88663	0.0231002	0.157708	Up	1.07391	0.960599	1.99509	5.34104	6.60041	3.70377	CYP99A2		GO:0020037,GO:0004497,GO:0005506,GO:0016705,GO:0055114,GO:0016491,GO:0046872	heme binding|monooxygenase activity|iron ion binding|oxidoreductase activity, acting on paired donors, with incorporation or reduction of molecular oxygen|oxidation-reduction process|oxidoreductase activity|metal ion binding
733	TraesCS7B02G305800	83.7753	35.6384	131.912	3.7014	1.88807	0.0230835	0.157622	Up	1.5918	0.611365	1.27301	3.61873	3.62003	3.86224
734	TraesCS2A02G412300	367.313	156.242	578.383	3.70184	1.88824	0.0190227	0.138728	Up	4.29319	5.62501	4.26018	15.0519	28.1922	11.8812	SCPL18		GO:0004185,GO:0006508	serine-type carboxypeptidase activity|proteolysis
735	TraesCS7B02G392700	110.176	46.8481	173.504	3.70355	1.88891	0.0280747	0.179054	Up	1.65042	1.78475	1.01555	6.07956	5.0459	3.64118			GO:0016020,GO:0008375	membrane|acetylglucosaminyltransferase activity
736	TraesCS3D02G279800	40.3582	17.1606	63.5557	3.70359	1.88892	0.0229512	0.157039	Up	1.04182	0.478565	0.320312	1.61109	3.00126	2.79176	RhGT1	Glycosyltransferase [Source:UniProtKB/TrEMBL;Acc:A0A1D5WMI2]	GO:0016758	transferase activity, transferring hexosyl groups
737	TraesCS6A02G321900	23.5656	10.0169	37.1142	3.70516	1.88953	0.0356457	0.207343	Up	0.139338	0.172348	0.200789	0.468066	0.151596	0.758383	EDR1		GO:0005524,GO:0004672,GO:0006468	ATP binding|protein kinase activity|protein phosphorylation
738	TraesCS5B02G464500	1515.16	643.999	2386.32	3.70547	1.88966	0.0293632	0.183871	Up	12.5821	12.6479	18.1622	64.6027	57.7032	31.02	PL10A	RNA helicase [Source:UniProtKB/TrEMBL;Acc:A0A096USR9]	GO:0003676,GO:0005524,GO:0004386	nucleic acid binding|ATP binding|helicase activity
739	TraesCS1B02G128100	136.752	58.1234	215.381	3.70557	1.8897	0.0181784	0.134641	Up	0.324332	1.92275	2.43036	5.30055	5.93756	4.85085	TOPP9	Serine/threonine-protein phosphatase [Source:UniProtKB/TrEMBL;Acc:A0A341P1S3]	GO:0016787	hydrolase activity	ko04024,ko03015,ko04810,ko04114,ko04510,ko04390,ko04022,ko04113	cAMP signaling pathway|mRNA surveillance pathway|Regulation of actin cytoskeleton|Oocyte meiosis|Focal adhesion|Hippo signaling pathway|cGMP-PKG signaling pathway|Meiosis - yeast
740	TraesCS7D02G182700	46.823	19.8954	73.7507	3.70692	1.89022	0.0334904	0.199252	Up	1.03317	0.425721	0.941973	3.52558	3.25623	2.56704	ERF060		GO:0003700,GO:0003677,GO:0006355	DNA-binding transcription factor activity|DNA binding|regulation of transcription, DNA-templated
741	TraesCS2A02G309500	40.7201	17.3014	64.1388	3.70714	1.89031	0.0462759	0.244321	Up	1.10383	0.656639	0.452228	2.38509	1.40788	1.83992	CID7		GO:0005737	cytoplasm
742	TraesCS3B02G215400	822.319	349.267	1295.37	3.70882	1.89096	0.0130709	0.10794	Up	20.6958	15.1477	12.937	61.174	64.5125	57.7308	Os01g0270100	Cysteine proteinase inhibitor [Source:UniProtKB/TrEMBL;Acc:W5CQ97]	GO:0004869,GO:0030414,GO:0010466,GO:0010951	cysteine-type endopeptidase inhibitor activity|peptidase inhibitor activity|negative regulation of peptidase activity|negative regulation of endopeptidase activity
743	TraesCS5D02G211200	454.414	192.948	715.88	3.71023	1.89151	0.0240588	0.161839	Up	4.37629	4.55361	5.31712	19.3832	22.1418	9.84903	TIFY6B				ko04075	Plant hormone signal transduction
744	TraesCS6A02G177600	576.869	244.935	908.803	3.71038	1.89157	0.0218277	0.151671	Up	6.94305	5.3599	5.79263	26.8659	22.75	15.1309	RPT6A		GO:0005737,GO:0005524,GO:0016787,GO:0030163,GO:0000166	cytoplasm|ATP binding|hydrolase activity|protein catabolic process|nucleotide binding	ko03050	Proteasome
745	TraesCS4D02G052500	478.478	203.114	753.842	3.71142	1.89197	0.00561452	0.0611475	Up	3.8367	5.03488	7.44	13.3697	26.5469	29.5797	GAD1	Glutamate decarboxylase [Source:UniProtKB/TrEMBL;Acc:W5DRS3]	GO:0030170,GO:0003824,GO:0004351,GO:0006536,GO:0019752,GO:0016831,GO:0016829	pyridoxal phosphate binding|catalytic activity|glutamate decarboxylase activity|glutamate metabolic process|carboxylic acid metabolic process|carboxy-lyase activity|lyase activity	ko00410,ko00430,ko00650,ko00250,ko02024	beta-Alanine metabolism|Taurine and hypotaurine metabolism|Butanoate metabolism|Alanine, aspartate and glutamate metabolism|Quorum sensing
746	TraesCS4B02G132000	30.2478	12.8389	47.6567	3.71191	1.89216	0.0371388	0.212966	Up	0.319704	0.244072	0.471824	1.24444	1.18136	1.10688	PK1		GO:0005524,GO:0004672,GO:0048544,GO:0006468	ATP binding|protein kinase activity|recognition of pollen|protein phosphorylation
747	TraesCS3A02G466700	48.6493	20.6393	76.6593	3.71424	1.89307	0.0458764	0.243029	Up	1.00016	0.76437	0.49035	3.47821	2.60873	1.74775	THIM		GO:0004417,GO:0009228	hydroxyethylthiazole kinase activity|thiamine biosynthetic process	ko00730	Thiamine metabolism
748	TraesCS2B02G209100	1493.3	633.325	2353.28	3.71576	1.89366	0.0193814	0.140397	Up	53.8367	36.7306	28.8718	154.598	172.435	105.868			GO:0003723,GO:0003746,GO:0043022,GO:0045905,GO:0006452,GO:0045901	RNA binding|translation elongation factor activity|ribosome binding|positive regulation of translational termination|translational frameshifting|positive regulation of translational elongation
749	TraesCS1A02G182300	109.831	46.5737	173.088	3.71645	1.89392	0.0275898	0.177042	Up	2.07773	1.12322	1.63838	7.71856	8.59995	4.43817	At2g46620		GO:0016021,GO:0005524	integral component of membrane|ATP binding
750	TraesCS5B02G196600	47.747	20.2453	75.2488	3.71686	1.89408	0.00785192	0.0766093	Up	0.370381	0.168807	0.855928	0.858123	1.83803	3.47639	PBL28		GO:0005524,GO:0004672,GO:0004674,GO:0006468	ATP binding|protein kinase activity|protein serine/threonine kinase activity|protein phosphorylation
751	TraesCS5B02G149700	155.112	65.7539	244.471	3.71797	1.89451	0.0310156	0.190145	Up	0.811009	0.892691	0.994524	3.21434	3.54724	1.51422
752	TraesCS3D02G285500	78.819	33.411	124.227	3.71815	1.89458	0.0378581	0.215548	Up	1.0439	0.811711	0.886728	3.78074	4.90477	1.67815	Os01g0723600		GO:0000287,GO:0004749,GO:0009116,GO:0009165	magnesium ion binding|ribose phosphate diphosphokinase activity|nucleoside metabolic process|nucleotide biosynthetic process
753	TraesCS2B02G202700	323.866	137.244	510.488	3.71956	1.89513	0.0239907	0.161612	Up	7.93258	5.10149	4.81604	26.3416	30.1663	14.7523	AFP-B1	Ninja-family protein 2 [Source:UniProtKB/Swiss-Prot;Acc:B1B5D4]	GO:0007165,GO:0005634	signal transduction|nucleus
754	TraesCS4B02G214600	112.942	47.8575	178.026	3.71992	1.89527	0.0207432	0.146602	Up	1.26438	1.3324	1.231	3.46618	3.94491	3.51505	CRPK1		GO:0005524,GO:0004672,GO:0006468	ATP binding|protein kinase activity|protein phosphorylation
755	TraesCS5B02G137000	302.187	128.003	476.372	3.72156	1.89591	0.0207881	0.146784	Up	2.26944	2.18047	2.50496	8.80952	8.38144	5.63822	GFA1		GO:1901135,GO:0097367,GO:0004360,GO:1901137	carbohydrate derivative metabolic process|carbohydrate derivative binding|glutamine-fructose-6-phosphate transaminase (isomerizing) activity|carbohydrate derivative biosynthetic process	ko00250,ko00520	Alanine, aspartate and glutamate metabolism|Amino sugar and nucleotide sugar metabolism
756	TraesCS3B02G256600	302.707	128.21	477.203	3.72204	1.89609	0.0267035	0.17359	Up	3.53114	3.11993	4.15132	14.6961	13.7834	6.73285	nem1		GO:0016791,GO:0016311	phosphatase activity|dephosphorylation
757	TraesCS5D02G168600	320.894	135.906	505.883	3.72231	1.8962	0.0284589	0.180437	Up	4.69606	2.9051	2.94394	13.5995	13.6442	6.86347
758	TraesCS5A02G506600	58.6806	24.8492	92.5119	3.72294	1.89644	0.0333574	0.198865	Up	0.457979	0.496469	0.472648	1.8761	1.59897	1.09941	NPGR2		GO:0005515	protein binding
759	TraesCS5A02G247600	90.2892	38.2283	142.35	3.72369	1.89673	0.0294359	0.184209	Up	3.2857	3.31189	1.52028	10.1997	15.5734	6.69406	PUP1		GO:0016021,GO:0005215	integral component of membrane|transporter activity
760	TraesCS2D02G117200	92.3235	39.088	145.559	3.72387	1.8968	0.0299633	0.186163	Up	0.64334	0.535011	0.694533	1.84341	2.37897	1.32086	RLCK185		GO:0005524,GO:0004672,GO:0004674,GO:0006468,GO:0000166	ATP binding|protein kinase activity|protein serine/threonine kinase activity|protein phosphorylation|nucleotide binding
761	TraesCS7A02G257200	98.3792	41.6475	155.111	3.72437	1.897	0.034682	0.203768	Up	0.9615	0.792032	1.18366	3.20916	5.40388	1.77686	RIN4
762	TraesCS7B02G207100	51.2378	21.69	80.7856	3.72455	1.89707	0.0438214	0.23604	Up	1.27729	0.874056	0.907324	4.53216	4.70521	2.16061	PUB8	RING-type E3 ubiquitin transferase [Source:UniProtKB/TrEMBL;Acc:A0A1D6C1V9]	GO:0004842,GO:0016567	ubiquitin-protein transferase activity|protein ubiquitination
763	TraesCS3A02G252800	266.457	112.789	420.124	3.72485	1.89718	0.0265363	0.173027	Up	1.92453	1.39242	1.2492	5.88574	5.03629	3.10143	IST1		GO:0015031	protein transport	ko04144	Endocytosis
764	TraesCS1A02G077200	499.882	211.562	788.201	3.72562	1.89748	0.0226892	0.155726	Up	6.70903	4.55316	4.70703	20.2098	20.0412	11.5423	ASK3		GO:0005524,GO:0004672,GO:0006468,GO:0004674,GO:0000166,GO:0016301,GO:0016310	ATP binding|protein kinase activity|protein phosphorylation|protein serine/threonine kinase activity|nucleotide binding|kinase activity|phosphorylation	ko04110,ko04390,ko04340,ko04550,ko04341,ko04151,ko04510,ko04310,ko04012,ko04150	Cell cycle|Hippo signaling pathway|Hedgehog signaling pathway|Signaling pathways regulating pluripotency of stem cells|Hedgehog signaling pathway - fly|PI3K-Akt signaling pathway|Focal adhesion|Wnt signaling pathway|ErbB signaling pathway|mTOR signaling pathway
765	TraesCS6A02G318400	151.285	64.0263	238.543	3.7257	1.89751	0.0104008	0.0926631	Up	0.702791	1.26075	1.56905	3.16725	5.12344	4.93606	QUA2		GO:0008168	methyltransferase activity
766	TraesCS4B02G321000	99.7949	42.2297	157.36	3.72629	1.89774	0.0374427	0.214019	Up	0.717749	1.05935	0.904802	3.02408	2.69146	1.37627	KEA5		GO:0016021,GO:0055085,GO:0015299,GO:0006812	integral component of membrane|transmembrane transport|solute:proton antiporter activity|cation transport
767	TraesCSU02G122000	313.894	132.794	494.994	3.72754	1.89823	0.0108828	0.0957226	Up	7.45218	2.86104	5.13449	18.7356	14.7583	21.1143	gto2		GO:0004364,GO:0005515	glutathione transferase activity|protein binding
768	TraesCS7B02G296400	453.214	191.689	714.739	3.72864	1.89865	0.0470074	0.246542	Up	3.96215	2.84986	2.73738	14.4783	10.9129	6.54988
769	TraesCS7B02G299000	173.851	73.5289	274.173	3.72878	1.8987	0.0238963	0.161166	Up	2.33511	2.03126	3.05655	10.5417	7.64955	6.26925	ARP1		GO:0003676,GO:0003723,GO:0003729,GO:0007281	nucleic acid binding|RNA binding|mRNA binding|germ cell development
770	TraesCS7D02G295900	138.13	58.4179	217.842	3.72902	1.8988	0.0161457	0.124478	Up	1.92508	1.20599	2.47346	5.14528	8.82897	6.5108	MPK2		GO:0005524,GO:0004672,GO:0004713,GO:0006468	ATP binding|protein kinase activity|protein tyrosine kinase activity|protein phosphorylation
771	TraesCS1B02G157300	24.7788	10.4777	39.0799	3.72981	1.8991	0.0494706	0.254099	Up	0.402323	0.227299	0.286057	1.14866	2.0136	0.996058	LECRK41		GO:0016021,GO:0030246,GO:0005524,GO:0004672,GO:0006468	integral component of membrane|carbohydrate binding|ATP binding|protein kinase activity|protein phosphorylation
772	TraesCS5D02G378500	134.114	56.7012	211.527	3.73055	1.89939	0.0460066	0.243445	Up	1.59308	1.01882	0.869337	6.02147	5.49525	2.48518	At3g49055
773	TraesCS2D02G176000	161.163	68.1313	254.194	3.73095	1.89954	0.0133918	0.109865	Up	0.989567	1.67182	1.74069	1.84994	4.37601	10.8704	KAS2		GO:0016747,GO:0003824,GO:0006633,GO:0016740	transferase activity, transferring acyl groups other than amino-acyl groups|catalytic activity|fatty acid biosynthetic process|transferase activity	ko00061,ko01212,ko00780	Fatty acid biosynthesis|Fatty acid metabolism|Biotin metabolism
774	TraesCS5D02G261400	180.374	76.2306	284.518	3.73234	1.90008	0.0137234	0.111824	Up	4.30145	2.63105	2.0059	7.92055	22.4175	12.0544	At3g22730		GO:0005515	protein binding
775	TraesCS1B02G126800	25.8186	10.909	40.7281	3.73343	1.9005	0.0455011	0.241744	Up	0.0214281	0.53185	0.235203	1.09402	0.875679	0.767411	RPC53		GO:0003677,GO:0006383,GO:0003899,GO:0005666	DNA binding|transcription by RNA polymerase III|DNA-directed 5'-3' RNA polymerase activity|RNA polymerase III complex	ko00230,ko00240,ko03020	Purine metabolism|Pyrimidine metabolism|RNA polymerase
776	TraesCS7A02G324800	90.4951	38.234	142.756	3.73375	1.90063	0.0324899	0.195606	Up	2.12235	1.37152	1.21529	6.65454	6.03485	3.54046	UDP-GALT1		GO:0016021	integral component of membrane
777	TraesCS5B02G112500	1750.2	739.449	2760.96	3.7338	1.90065	0.0260535	0.171076	Up	12.3926	6.94907	8.4107	37.3541	40.135	17.5285	CLPC2		GO:0005524,GO:0019538,GO:0005515	ATP binding|protein metabolic process|protein binding
778	TraesCS3A02G338500	62.4664	26.3909	98.542	3.73394	1.9007	0.0320357	0.193877	Up	1.06548	0.988152	0.698064	2.76239	2.70708	1.95581	SKIP24		GO:0005515	protein binding
779	TraesCS2D02G154500	78.8803	33.3036	124.457	3.73704	1.9019	0.0351497	0.205557	Up	1.56097	0.764676	0.642682	4.42349	6.17737	2.37015
780	TraesCS2B02G183300	392.542	165.661	619.423	3.73911	1.90269	0.0246574	0.164669	Up	6.49333	4.89042	6.21911	20.2908	28.4224	11.1295	BHLH062		GO:0046983	protein dimerization activity
781	TraesCS6B02G214000	31.3539	13.231	49.4767	3.73946	1.90283	0.0398962	0.22283	Up	0.436369	0.56803	0.575756	0.877426	2.30566	1.54674	ATG8A	Autophagy-related protein [Source:UniProtKB/TrEMBL;Acc:A0A1D6AZ93]	GO:0006914,GO:0005737	autophagy|cytoplasm	ko04068,ko04140,ko04139	FoxO signaling pathway|Regulation of autophagy|Regulation of mitophagy - yeast
782	TraesCS7A02G364400	236.059	99.5845	372.534	3.74088	1.90338	0.0238833	0.161105	Up	3.49639	4.00084	4.76902	17.8892	15.3882	9.85688	PP2A1		GO:0016787	hydrolase activity	ko03015,ko04390,ko04530,ko04391,ko04114,ko04152,ko04350,ko04071,ko04151,ko04111,ko04013,ko04113	mRNA surveillance pathway|Hippo signaling pathway|Tight junction|Hippo signaling pathway - fly|Oocyte meiosis|AMPK signaling pathway|TGF-beta signaling pathway|Sphingolipid signaling pathway|PI3K-Akt signaling pathway|Cell cycle - yeast|MAPK signaling pathway - fly|Meiosis - yeast
783	TraesCS4D02G301000	219.071	92.4138	345.728	3.74108	1.90346	0.0198783	0.14268	Up	1.05908	1.08567	2.18639	3.7676	7.48507	3.29154			GO:0016021	integral component of membrane
784	TraesCS2A02G343900	555.406	234.109	876.702	3.74484	1.9049	0.0168264	0.128134	Up	5.67255	7.34003	10.2449	31.5567	39.6684	22.4019	ARB_05372	Aldose 1-epimerase [Source:UniProtKB/TrEMBL;Acc:A0A1D5TBS2]	GO:0005975,GO:0030246,GO:0003824,GO:0016853,GO:0019318,GO:0004034	carbohydrate metabolic process|carbohydrate binding|catalytic activity|isomerase activity|hexose metabolic process|aldose 1-epimerase activity	ko00052,ko00010	Galactose metabolism|Glycolysis / Gluconeogenesis
785	TraesCS7B02G271200	109.725	46.2482	173.202	3.74505	1.90498	0.0143475	0.115003	Up	1.96432	1.03655	1.45365	4.14531	9.12855	5.89627	AAP3		GO:0016021	integral component of membrane
786	TraesCS3A02G467100	141.432	59.5795	223.285	3.74768	1.906	0.0309814	0.189979	Up	1.32737	0.708822	0.59087	4.02183	3.1697	2.10897	At3g61800		GO:0009411	response to UV
787	TraesCS2D02G400400	263.939	111.149	416.729	3.74929	1.90662	0.0427603	0.232613	Up	1.69397	1.58592	1.30465	7.52815	5.93419	3.36799	ETL1		GO:0005524,GO:0006974,GO:0071494	ATP binding|cellular response to DNA damage stimulus|cellular response to UV-C	ko04550	Signaling pathways regulating pluripotency of stem cells
788	TraesCS1B02G068500	1306.86	550.284	2063.44	3.74977	1.9068	0.0111534	0.0973113	Up	4.07734	26.5429	38.4106	89.6233	100.275	81.0257
789	TraesCS6A02G144900	165.769	69.7781	261.76	3.75131	1.9074	0.0283109	0.179955	Up	1.10832	1.64716	1.06516	5.31022	5.15206	2.76995	PAT24	S-acyltransferase [Source:UniProtKB/TrEMBL;Acc:A0A1D6AJE6]	GO:0016021,GO:0019706,GO:0005515	integral component of membrane|protein-cysteine S-palmitoyltransferase activity|protein binding
790	TraesCS3A02G116200	22.1756	9.33397	35.0172	3.75159	1.9075	0.0403462	0.224481	Up	0.290064	0.284536	0.451075	0.737261	2.37421	1.3693	WRKY13		GO:0003700,GO:0043565,GO:0005634,GO:0006355	DNA-binding transcription factor activity|sequence-specific DNA binding|nucleus|regulation of transcription, DNA-templated
791	TraesCS3A02G453200	461.254	194.139	728.368	3.75178	1.90757	0.0469553	0.246365	Up	7.12159	6.84496	6.43709	33.3597	30.1267	13.3562	ATG18A		GO:0005515	protein binding
792	TraesCS3D02G381400	224.318	94.3961	354.24	3.7527	1.90793	0.00751162	0.0744356	Up	3.25422	2.39619	3.36245	10.2512	12.0664	17.2098	AAP6		GO:0016021	integral component of membrane
793	TraesCS4B02G306400	173.556	73.0324	274.079	3.75284	1.90798	0.017742	0.132574	Up	2.68537	2.53024	1.23912	7.08577	8.66963	6.57868	At5g64970		GO:0016021,GO:0022857,GO:0055085	integral component of membrane|transmembrane transporter activity|transmembrane transport
794	TraesCSU02G080700	1095.08	460.778	1729.38	3.75317	1.90811	0.0332058	0.198351	Up	8.5452	7.7767	8.59842	40.6278	30.1725	19.0046	RPT1A		GO:0005737,GO:0005524,GO:0016787,GO:0030163,GO:0000166	cytoplasm|ATP binding|hydrolase activity|protein catabolic process|nucleotide binding	ko03050	Proteasome
795	TraesCS1B02G207100	54.561	22.9571	86.165	3.75331	1.90816	0.032946	0.197353	Up	0.548726	0.550878	0.596808	2.91166	2.04831	1.84892	NMD3	60S ribosomal export protein NMD3 [Source:UniProtKB/TrEMBL;Acc:A0A1D5SCD2]	GO:0005737,GO:0005634,GO:0000055,GO:0043023	cytoplasm|nucleus|ribosomal large subunit export from nucleus|ribosomal large subunit binding	ko03008,ko03013	Ribosome biogenesis in eukaryotes|RNA transport
796	TraesCS5B02G325800	192.133	80.8397	303.426	3.75342	1.90821	0.0250648	0.166634	Up	2.5739	2.25248	1.41548	11.0181	7.05371	6.53163	BBR
797	TraesCS3A02G255000	347.447	146.137	548.757	3.75508	1.90884	0.0278741	0.178268	Up	3.28039	1.67744	1.73734	9.09296	8.78879	4.08491	SFH8		GO:0016021	integral component of membrane
798	TraesCS4B02G182600	266.125	111.921	420.33	3.75561	1.90905	0.020959	0.147477	Up	7.31502	4.5357	5.38394	23.6482	22.7177	15.1514	ECHIA		GO:0003824	catalytic activity
799	TraesCS7D02G279900	758.695	319.053	1198.34	3.75592	1.90917	0.0131681	0.108564	Up	7.52043	6.69416	12.7206	35.0221	45.5476	30.7195	SCPL51	Carboxypeptidase [Source:UniProtKB/TrEMBL;Acc:A0A1D6CYB3]	GO:0004185,GO:0006508	serine-type carboxypeptidase activity|proteolysis
800	TraesCS2B02G240800	166.204	69.8879	262.521	3.75632	1.90932	0.0286246	0.181138	Up	1.70093	1.21301	1.465	5.2586	8.14534	2.79438	CRK6		GO:0016021,GO:0005524,GO:0004672,GO:0006468,GO:0016020,GO:0016301,GO:0016310	integral component of membrane|ATP binding|protein kinase activity|protein phosphorylation|membrane|kinase activity|phosphorylation
801	TraesCS4D02G205200	64.61	27.1645	102.055	3.75694	1.90956	0.0301368	0.18673	Up	0.739155	1.76511	1.0429	0.182223	2.08789	1.83766	ORRM6		GO:0003676	nucleic acid binding
802	TraesCS6A02G327500	45.1923	18.9955	71.389	3.7582	1.91004	0.0366455	0.211136	Up	1.09675	0.36931	0.228306	1.85815	1.72366	1.42449	MEKK1		GO:0005524,GO:0004672,GO:0006468	ATP binding|protein kinase activity|protein phosphorylation
803	TraesCS6B02G296300	55.7731	23.4413	88.1049	3.75853	1.91017	0.0234217	0.159193	Up	0.91564	0.792275	0.638027	2.70188	3.56631	2.72621	PHL11		GO:0005634,GO:0003677	nucleus|DNA binding
804	TraesCS5B02G243100	635.375	267.018	1003.73	3.75905	1.91037	0.0253234	0.167879	Up	7.28074	5.41641	6.57915	21.9905	28.8741	11.514	BCA5	Carbonic anhydrase [Source:UniProtKB/TrEMBL;Acc:A0A341VDR1]	GO:0008270,GO:0004089,GO:0015976	zinc ion binding|carbonate dehydratase activity|carbon utilization	ko00910	Nitrogen metabolism
805	TraesCS7D02G211900	3664.81	1539.87	5789.75	3.75991	1.9107	0.019262	0.13981	Up	41.7804	30.6609	44.0139	150.864	168.271	91.6352	ALDH2B7		GO:0016491,GO:0016620,GO:0055114	oxidoreductase activity|oxidoreductase activity, acting on the aldehyde or oxo group of donors, NAD or NADP as acceptor|oxidation-reduction process	ko00561,ko00071,ko00380,ko00310,ko00040,ko00410,ko00340,ko00620,ko00330,ko00903,ko00280,ko00625,ko00053,ko00010	Glycerolipid metabolism|Fatty acid degradation|Tryptophan metabolism|Lysine degradation|Pentose and glucuronate interconversions|beta-Alanine metabolism|Histidine metabolism|Pyruvate metabolism|Arginine and proline metabolism|Limonene and pinene degradation|Valine, leucine and isoleucine degradation|Chloroalkane and chloroalkene degradation|Ascorbate and aldarate metabolism|Glycolysis / Gluconeog…
806	TraesCS6D02G353700	53.1423	22.3263	83.9582	3.76051	1.91093	0.0332916	0.198597	Up	0.832531	0.749477	0.684448	2.85505	3.19687	1.96999	CAD5		GO:0016491,GO:0008270,GO:0055114	oxidoreductase activity|zinc ion binding|oxidation-reduction process	ko00940	Phenylpropanoid biosynthesis
807	TraesCS6B02G279100	59.6532	25.0512	94.2551	3.7625	1.91169	0.0184469	0.135912	Up	1.18782	0.567816	0.859432	3.27361	3.57367	3.85531	VP15	Molybdopterin synthase sulfur carrier subunit [Source:UniProtKB/TrEMBL;Acc:A0A1D6S9X3]	GO:0000166,GO:0006777,GO:0005829,GO:0019008,GO:0030366	nucleotide binding|Mo-molybdopterin cofactor biosynthetic process|cytosol|molybdopterin synthase complex|molybdopterin synthase activity
808	TraesCS6A02G098300	167.989	70.5413	265.437	3.76286	1.91183	0.0201201	0.143856	Up	6.12466	2.71102	3.00647	13.6283	13.6648	11.4482	Os02g0134000		GO:0006629,GO:0003824,GO:0009058,GO:0005829,GO:0015937,GO:0019915,GO:0009651,GO:0080020,GO:0004595	lipid metabolic process|catalytic activity|biosynthetic process|cytosol|coenzyme A biosynthetic process|lipid storage|response to salt stress|regulation of coenzyme A biosynthetic process|pantetheine-phosphate adenylyltransferase activity	ko00770	Pantothenate and CoA biosynthesis
809	TraesCS2D02G431000	346.746	145.574	547.919	3.76386	1.91221	0.0156368	0.121761	Up	8.6655	8.42415	8.88503	38.037	49.3581	28.4412	WRKY11		GO:0003700,GO:0043565,GO:0005634,GO:0006355,GO:0003677	DNA-binding transcription factor activity|sequence-specific DNA binding|nucleus|regulation of transcription, DNA-templated|DNA binding
810	TraesCS1B02G429400	62.8641	26.3865	99.3417	3.76486	1.9126	0.0142863	0.114702	Up	2.22863	1.98768	2.6369	8.59653	15.623	13.752
811	TraesCS1A02G308900	868.894	364.636	1373.15	3.76582	1.91296	0.0209708	0.147544	Up	14.0866	12.6295	8.59861	41.0685	54.3457	27.1451	KINB1		GO:0005515	protein binding	ko04152,ko04068	AMPK signaling pathway|FoxO signaling pathway
812	TraesCS6A02G166500	119.992	50.3388	189.645	3.76737	1.91356	0.0289541	0.182321	Up	1.96552	1.59359	1.71994	7.64374	6.38039	4.3323	NSE4A		GO:0005634,GO:0006281,GO:0030915	nucleus|DNA repair|Smc5-Smc6 complex
813	TraesCS7B02G286200	142.268	59.6598	224.875	3.7693	1.91429	0.0382005	0.21685	Up	2.69794	2.67427	2.9192	11.4724	12.17	4.78673	fmp32		GO:0016021	integral component of membrane
814	TraesCS3A02G125500	129.44	54.2633	204.617	3.77081	1.91488	0.0256979	0.169645	Up	3.93296	1.37379	1.52516	10.0927	13.4925	6.41329	UGT73C5	Glycosyltransferase [Source:UniProtKB/TrEMBL;Acc:A0A1D5VIJ9]	GO:0016758,GO:0016740,GO:0016757	transferase activity, transferring hexosyl groups|transferase activity|transferase activity, transferring glycosyl groups
815	TraesCS3A02G274000	118.966	49.8616	188.07	3.77184	1.91527	0.0297153	0.185304	Up	1.19293	0.99702	1.44231	4.63156	5.62283	2.4729	HT1		GO:0005524,GO:0004672,GO:0006468	ATP binding|protein kinase activity|protein phosphorylation
816	TraesCS3D02G412300	5127.63	2149.02	8106.24	3.77207	1.91536	0.0114856	0.0992163	Up	322.589	220.199	374.79	1270.94	1225.98	1063.83
817	TraesCS2A02G288300	171.997	72.0224	271.972	3.77621	1.91694	0.0272968	0.17581	Up	3.00369	1.97067	2.53743	9.38471	12.3642	5.03102	Os04g0398600		GO:0006486,GO:0016757	protein glycosylation|transferase activity, transferring glycosyl groups
818	TraesCS2A02G369700	304.667	127.56	481.774	3.77685	1.91718	0.0128552	0.106839	Up	7.7088	5.08168	7.1262	24.0592	36.9152	24.9202	Os04g0533500		GO:0016021,GO:0055114	integral component of membrane|oxidation-reduction process
819	TraesCS6D02G198600	229.546	96.0908	363.001	3.77769	1.9175	0.0209722	0.147544	Up	2.10622	1.60323	1.61476	7.51467	6.94486	4.99431	ARI8	RBR-type E3 ubiquitin transferase [Source:UniProtKB/TrEMBL;Acc:A0A341XCU6]	GO:0004842,GO:0016567	ubiquitin-protein transferase activity|protein ubiquitination
820	TraesCS4D02G317500	69.8489	29.227	110.471	3.77976	1.91829	0.0268054	0.173806	Up	0.741247	0.402517	0.685662	2.22812	1.86523	1.84474	KEA5		GO:0016021,GO:0055085,GO:0015299,GO:0006812	integral component of membrane|transmembrane transport|solute:proton antiporter activity|cation transport
821	TraesCS4A02G120900	283.461	118.548	448.375	3.78221	1.91923	0.0237622	0.160658	Up	7.72141	4.6342	3.77525	21.6824	23.5624	12.6089
822	TraesCS5D02G013300	632.855	264.644	1001.07	3.7827	1.91942	0.018244	0.134957	Up	7.14331	2.80226	5.08404	18.0627	19.017	12.9797	BLH7		GO:0005634,GO:0003677,GO:0006355	nucleus|DNA binding|regulation of transcription, DNA-templated
823	TraesCS5A02G306900	502.112	209.907	794.317	3.78413	1.91996	0.016271	0.125139	Up	6.65336	6.19829	8.21259	22.7515	29.9848	17.8912	Os09g0520200
824	TraesCS3D02G260200	254.037	106.185	401.889	3.78481	1.92022	0.0212686	0.148936	Up	2.934	2.28345	1.79111	9.60745	12.0239	6.59754	SR30		GO:0003676,GO:0003723	nucleic acid binding|RNA binding	ko03040	Spliceosome
825	TraesCS7A02G516600	298.09	124.52	471.659	3.78781	1.92136	0.0225329	0.155131	Up	3.81981	4.03649	3.32569	15.5459	14.7882	7.93773	At1g67300		GO:0016021,GO:0022857,GO:0016020,GO:0055085,GO:0005215	integral component of membrane|transmembrane transporter activity|membrane|transmembrane transport|transporter activity
826	TraesCS6D02G171900	120.173	50.1879	190.159	3.78893	1.92179	0.015624	0.121708	Up	1.63808	1.69811	1.46688	7.0377	6.19406	6.73026
827	TraesCS7D02G051200	595.133	248.489	941.777	3.79002	1.92221	0.0225613	0.155204	Up	17.126	14.6815	10.4197	50.6908	61.5566	26.3815	PEX11-5		GO:0005779,GO:0016559	integral component of peroxisomal membrane|peroxisome fission
828	TraesCS7B02G243500	1091.16	455.504	1726.81	3.79099	1.92258	0.0210991	0.148047	Up	9.75406	8.74108	8.88334	39.7795	36.5177	21.2794	PI4KG4		GO:0016301,GO:0005515	kinase activity|protein binding
829	TraesCS6B02G263700	47.7335	19.9155	75.5516	3.7936	1.92357	0.0398319	0.22272	Up	0.946786	1.12419	0.959714	4.26209	3.80961	2.43242	BRO1				ko04144	Endocytosis
830	TraesCS7B02G161100	475.624	198.369	752.879	3.79534	1.92423	0.0186292	0.136734	Up	8.35615	6.61649	6.69379	26.9348	26.9846	17.6129	Os08g0536000	Pyruvate dehydrogenase E1 component subunit beta [Source:UniProtKB/TrEMBL;Acc:A0A1D6DBW7]	GO:0003824,GO:0006096,GO:0004739,GO:0006086,GO:0005759	catalytic activity|glycolytic process|pyruvate dehydrogenase (acetyl-transferring) activity|acetyl-CoA biosynthetic process from pyruvate|mitochondrial matrix	ko04066,ko01200,ko00620,ko00020,ko00010	HIF-1 signaling pathway|Carbon metabolism|Pyruvate metabolism|Citrate cycle (TCA cycle)|Glycolysis / Gluconeogenesis
831	TraesCS1D02G154900	186.135	77.6254	294.644	3.79572	1.92437	0.0255246	0.168863	Up	1.91216	2.11748	3.36482	13.6997	10.8305	5.61203	UXT1		GO:0016021	integral component of membrane
832	TraesCS7B02G365600	21.1507	8.81859	33.4829	3.79685	1.9248	0.0297587	0.185446	Up	0.410725	0.403927	0.475437	1.19989	1.97607	2.39755	At3g13620		GO:0016021,GO:0022857,GO:0016020,GO:0055085	integral component of membrane|transmembrane transporter activity|membrane|transmembrane transport
833	TraesCS4D02G301200	166.177	69.2805	263.073	3.79722	1.92494	0.0208404	0.146952	Up	3.14669	2.52924	2.26362	9.57723	10.8542	6.87767	VPS37-2		GO:0015031,GO:0032509,GO:0000813	protein transport|endosome transport via multivesicular body sorting pathway|ESCRT I complex	ko04144	Endocytosis
834	TraesCS7B02G119000	393.025	163.834	622.217	3.79786	1.92519	0.0388258	0.219087	Up	7.51271	7.27752	6.92382	32.8497	28.0698	14.3603	AVT6A		GO:0016021	integral component of membrane
835	TraesCS6A02G311800	425.31	177.256	673.364	3.79883	1.92555	0.0335467	0.199376	Up	6.25584	5.83108	7.69627	30.1919	27.0532	13.7936	Os02g0739600	Pyruvate dehydrogenase E1 component subunit alpha [Source:UniProtKB/TrEMBL;Acc:A0A341X2B1]	GO:0004739,GO:0043231,GO:0006086,GO:0016624,GO:0016491,GO:0055114	pyruvate dehydrogenase (acetyl-transferring) activity|intracellular membrane-bounded organelle|acetyl-CoA biosynthetic process from pyruvate|oxidoreductase activity, acting on the aldehyde or oxo group of donors, disulfide as acceptor|oxidoreductase activity|oxidation-reduction process	ko04066,ko01200,ko00620,ko00020,ko00010	HIF-1 signaling pathway|Carbon metabolism|Pyruvate metabolism|Citrate cycle (TCA cycle)|Glycolysis / Gluconeogenesis
836	TraesCS6D02G213500	153.735	64.0718	243.399	3.79884	1.92556	0.0436528	0.235549	Up	1.6688	0.742423	0.805927	3.10392	5.78324	1.81977
837	TraesCS2B02G379100	52.1463	21.7301	82.5625	3.79944	1.92579	0.0278282	0.178073	Up	0.679735	1.13902	0.624591	2.45927	5.74145	2.41704	At3g47200		GO:0016021	integral component of membrane
838	TraesCS2D02G392600	23.7744	9.90686	37.6419	3.79958	1.92584	0.0399985	0.223213	Up	0.636647	0.750922	1.27067	3.36002	5.09366	2.9719	ATL70		GO:0008270	zinc ion binding
839	TraesCS7D02G214900	100.121	41.704	158.538	3.80151	1.92657	0.0239758	0.161539	Up	0.88347	0.619576	1.86604	5.19186	4.48563	3.20937	CRLK2		GO:0005524,GO:0004672,GO:0006468,GO:0016021	ATP binding|protein kinase activity|protein phosphorylation|integral component of membrane
840	TraesCS5B02G160900	268.261	111.729	424.794	3.80199	1.92676	0.0230481	0.157433	Up	4.07499	2.36471	1.75182	10.2973	11.9117	6.08372
841	TraesCS5A02G546600	113.543	47.2892	179.797	3.80207	1.92678	0.0299282	0.1861	Up	2.01638	1.16454	1.26483	6.85484	6.67595	3.37327	Os03g0107900		GO:0006486,GO:0016757	protein glycosylation|transferase activity, transferring glycosyl groups
842	TraesCS2B02G363000	358.198	149.119	567.277	3.80418	1.92759	0.0220906	0.153046	Up	4.37699	2.92601	2.7742	14.8092	14.4167	8.31062	SKIP14		GO:0005515	protein binding
843	TraesCS1A02G236500	106.713	44.4246	169.001	3.80422	1.9276	0.0192075	0.139553	Up	1.665	1.44938	1.85398	6.20967	6.412	4.99408			GO:0016787,GO:0006629	hydrolase activity|lipid metabolic process
844	TraesCS7A02G195300	56.9633	23.7113	90.2153	3.80474	1.9278	0.0389912	0.219581	Up	0.693554	0.84372	0.786965	3.51484	4.19415	1.6207
845	TraesCS2D02G265700	77.3371	32.1631	122.511	3.80907	1.92944	0.00706738	0.0715248	Up	0.424608	0.468135	0.724258	1.27031	2.68869	3.3158	GLR3.5	Glutamate receptor [Source:UniProtKB/TrEMBL;Acc:A0A1D5UU28]	GO:0016021,GO:0004970,GO:0016020,GO:0006811,GO:0034220,GO:0015276	integral component of membrane|ionotropic glutamate receptor activity|membrane|ion transport|ion transmembrane transport|ligand-gated ion channel activity
846	TraesCS3A02G371200	83.603	34.7597	132.446	3.81034	1.92992	0.0468097	0.24594	Up	1.78583	0.759245	1.38589	1.24846	6.16912	11.4841	CYP94C1		GO:0016021,GO:0020037,GO:0005506,GO:0016705,GO:0055114	integral component of membrane|heme binding|iron ion binding|oxidoreductase activity, acting on paired donors, with incorporation or reduction of molecular oxygen|oxidation-reduction process
847	TraesCS7B02G360600	149.737	62.2339	237.24	3.81206	1.93057	0.0264874	0.172793	Up	1.61793	2.93936	2.89194	10.6542	9.07063	4.65396	TOM2AH2		GO:0016021,GO:0016020	integral component of membrane|membrane
848	TraesCS3D02G316200	43.1847	17.948	68.4214	3.81221	1.93063	0.0216043	0.150578	Up	0.433024	0.474521	0.587492	2.02404	1.07361	2.13305	DLO1		GO:0046872,GO:0016491,GO:0055114	metal ion binding|oxidoreductase activity|oxidation-reduction process
849	TraesCS5B02G000100	476.505	197.942	755.067	3.81458	1.93152	0.0206673	0.146337	Up	8.33713	4.9784	5.30768	31.0912	23.6688	16.192	SUT2		GO:0005801,GO:0008515,GO:0005887,GO:0009705,GO:0015770	cis-Golgi network|sucrose transmembrane transporter activity|integral component of plasma membrane|plant-type vacuole membrane|sucrose transport
850	TraesCS7A02G432000	102.268	42.4826	162.054	3.8146	1.93153	0.0182056	0.134768	Up	1.7561	0.968354	0.86116	4.27632	3.9312	3.93662
851	TraesCS5B02G319100	31.3485	13.0182	49.6788	3.81612	1.9321	0.0372373	0.21327	Up	1.26288	1.14738	0.770016	5.2375	4.41662	2.72729
852	TraesCS5A02G112000	59.2108	24.5671	93.8546	3.82033	1.9337	0.0168789	0.128397	Up	3.15281	2.88911	2.37457	11.736	12.3923	12.7863			GO:0016021	integral component of membrane
853	TraesCS5A02G072200	92.0968	38.1922	146.001	3.8228	1.93463	0.0196471	0.141553	Up	1.11969	1.0815	1.05839	4.64681	3.98962	3.71959	NRAMP6		GO:0016021,GO:0030001,GO:0016020,GO:0046873	integral component of membrane|metal ion transport|membrane|metal ion transmembrane transporter activity	ko04142	Lysosome
854	TraesCS2D02G500400	181.638	75.3021	287.973	3.82424	1.93517	0.0126454	0.105713	Up	2.89747	2.68818	2.64828	9.05396	11.8571	9.70662	Os04g0659500		GO:0046872,GO:0003824,GO:0004722,GO:0043169,GO:0016787,GO:0004721,GO:0006470	metal ion binding|catalytic activity|protein serine/threonine phosphatase activity|cation binding|hydrolase activity|phosphoprotein phosphatase activity|protein dephosphorylation
855	TraesCS4D02G159500	537.104	222.611	851.597	3.82549	1.93565	0.0178226	0.13299	Up	4.67172	5.42766	7.60082	23.1266	25.1386	13.9902	CGS1		GO:0030170,GO:0003824	pyridoxal phosphate binding|catalytic activity	ko01230,ko00920,ko00270,ko00450	Biosynthesis of amino acids|Sulfur metabolism|Cysteine and methionine metabolism|Selenocompound metabolism
856	TraesCS1B02G194300	16.5363	6.85157	26.2209	3.827	1.93621	0.0413315	0.22767	Up	0.24978	0.428223	0.287127	0.435642	2.32851	1.48703	GSTU6		GO:0005515	protein binding
857	TraesCS7A02G120000	158.436	65.6419	251.229	3.82727	1.93632	0.0266214	0.17335	Up	4.93098	2.90852	2.44171	12.5485	14.0004	6.58351			GO:0043130,GO:0000813,GO:0043162	ubiquitin binding|ESCRT I complex|ubiquitin-dependent protein catabolic process via the multivesicular body sorting pathway
858	TraesCS4A02G149700	251.309	104.088	398.529	3.82877	1.93688	0.01964	0.141527	Up	3.14091	1.6797	1.98563	8.72918	9.26763	5.78471	SPAC26H5.04		GO:0005515	protein binding
859	TraesCS7D02G416900	465.401	192.759	738.042	3.82883	1.93691	0.0176546	0.132216	Up	11.5842	8.17792	7.28859	31.2436	38.636	21.7202	LRR1		GO:0005515	protein binding
860	TraesCS4D02G023700	152.014	62.9555	241.072	3.82925	1.93706	0.025426	0.168378	Up	2.56586	1.87723	1.97362	8.95782	8.60277	5.21941	B'BETA	Serine/threonine protein phosphatase 2A regulatory subunit [Source:UniProtKB/TrEMBL;Acc:A0A341UBH2]	GO:0007165,GO:0019888,GO:0000159	signal transduction|protein phosphatase regulator activity|protein phosphatase type 2A complex	ko03015,ko04114,ko04152,ko04071,ko04151,ko04113	mRNA surveillance pathway|Oocyte meiosis|AMPK signaling pathway|Sphingolipid signaling pathway|PI3K-Akt signaling pathway|Meiosis - yeast
861	TraesCS5D02G095200	150.866	62.4684	239.264	3.83016	1.9374	0.0405325	0.224971	Up	2.38995	4.10939	4.81531	14.9831	28.4189	7.36774	Os12g0568700	CASP-like protein [Source:UniProtKB/TrEMBL;Acc:W5G3T5]	GO:0016021,GO:0005886	integral component of membrane|plasma membrane
862	TraesCS2A02G285900	96.1476	39.8076	152.487	3.83061	1.93757	0.0111168	0.0971087	Up	1.30029	1.4261	1.54812	5.99083	5.59606	7.26024	GDPD2		GO:0006629,GO:0008081	lipid metabolic process|phosphoric diester hydrolase activity
863	TraesCS1B02G299600	23.4675	9.71526	37.2198	3.83107	1.93775	0.0433155	0.234408	Up	0	0	0	0	0	1.34614
864	TraesCS4A02G236800	376.595	155.891	597.299	3.83151	1.93791	0.0229138	0.156837	Up	5.77727	4.07082	3.50907	20.9245	17.9421	10.152
865	TraesCS7B02G283200	731.452	302.768	1160.14	3.83176	1.93801	0.0113155	0.0982379	Up	8.41407	7.03035	6.50468	23.8244	28.6659	26.0372	RGLG2
866	TraesCS1B02G247200	162.283	67.1573	257.408	3.83291	1.93844	0.021162	0.148423	Up	1.857	1.73244	1.96934	7.69452	10.0362	5.64227			GO:0016787,GO:0006629	hydrolase activity|lipid metabolic process
867	TraesCS2D02G174200	61.3178	25.3746	97.2611	3.83301	1.93848	0.0147485	0.11711	Up	1.33893	0.725719	0.663333	2.54171	3.29881	3.89826
868	TraesCS4D02G056300	108.728	44.9832	172.472	3.83414	1.9389	0.0179811	0.133736	Up	4.22593	2.32341	4.56577	15.5692	18.0829	14.1164
869	TraesCS6D02G254500	177.387	73.3639	281.409	3.8358	1.93953	0.0190846	0.13897	Up	2.08442	1.33853	1.03	4.08128	6.29532	3.54193	TTM1		GO:0005524,GO:0016301	ATP binding|kinase activity
870	TraesCS4B02G016000	456.388	188.747	724.029	3.83598	1.9396	0.0263418	0.172237	Up	4.02022	2.86388	3.14725	15.4023	13.068	7.38597	At5g47430		GO:0005634,GO:0003676,GO:0008270,GO:0016567,GO:0061630,GO:0006397	nucleus|nucleic acid binding|zinc ion binding|protein ubiquitination|ubiquitin protein ligase activity|mRNA processing
871	TraesCS6A02G182500	904.962	374.249	1435.68	3.83615	1.93966	0.011174	0.0973966	Up	6.39807	6.2281	7.27228	24.1824	25.414	22.916	Os02g0218200	Aminopeptidase [Source:UniProtKB/TrEMBL;Acc:A0A341WJA0]	GO:0008270,GO:0008237,GO:0006508	zinc ion binding|metallopeptidase activity|proteolysis
872	TraesCS4A02G268800	67.1253	27.7412	106.509	3.83938	1.94087	0.0339557	0.201008	Up	1.59128	1.59242	1.21688	8.64865	6.51671	3.85599	At4g39670		GO:0005737,GO:0005634,GO:0120013,GO:0120009	cytoplasm|nucleus|lipid transfer activity|intermembrane lipid transfer
873	TraesCS4D02G336500	56.4348	23.323	89.5465	3.83941	1.94089	0.0361677	0.209286	Up	0.446633	0.455424	0.338556	1.83807	1.90223	0.949042
874	TraesCS4A02G179800	354.222	146.384	562.06	3.83962	1.94096	0.0126325	0.105648	Up	5.90139	5.61031	8.21387	24.5541	25.896	21.9288	SMO2-1		GO:0016021,GO:0016491,GO:0005506,GO:0055114,GO:0008610	integral component of membrane|oxidoreductase activity|iron ion binding|oxidation-reduction process|lipid biosynthetic process	ko00100	Steroid biosynthesis
875	TraesCS3B02G416400	128.44	53.0786	203.802	3.83963	1.94097	0.0116038	0.0998928	Up	2.8593	2.60085	3.0353	8.69526	17.0676	11.7949	MYB330		GO:0003677,GO:0005634	DNA binding|nucleus
876	TraesCS7D02G380700	271.773	112.223	431.323	3.84345	1.9424	0.0176903	0.132372	Up	3.12496	2.44284	2.63606	11.9099	9.39992	7.77097	At3g51130
877	TraesCS3D02G426600	626.507	258.659	994.354	3.84426	1.94271	0.0219542	0.152431	Up	4.00499	2.7586	3.11618	13.126	16.1343	6.57278	HK3		GO:0000160,GO:0007165,GO:0000155,GO:0016772,GO:0016310	phosphorelay signal transduction system|signal transduction|phosphorelay sensor kinase activity|transferase activity, transferring phosphorus-containing groups|phosphorylation	ko04075	Plant hormone signal transduction
878	TraesCS4A02G079600	128.855	53.1921	204.519	3.84491	1.94295	0.0259669	0.170761	Up	1.34774	1.32004	1.20164	5.94481	5.84999	3.01314
879	TraesCS1D02G190100	23.497	9.69822	37.2959	3.84564	1.94322	0.0307362	0.189113	Up	1.6009	0.148158	0.212814	1.84049	2.94392	2.91768	GSTU6		GO:0005515	protein binding
880	TraesCS5D02G388400	139.369	57.505	221.233	3.8472	1.94381	0.0422216	0.230874	Up	1.596	1.37669	1.09	5.29059	5.14099	2.85967	FBL17		GO:0005515	protein binding
881	TraesCS1B02G194900	195.809	80.7911	310.826	3.84729	1.94384	0.00919859	0.0854501	Up	5.29121	2.01607	5.27295	7.79713	25.9457	17.3403	GSTU17		GO:0005515	protein binding	ko00982,ko00480,ko00980	Drug metabolism - cytochrome P450|Glutathione metabolism|Metabolism of xenobiotics by cytochrome P450
882	TraesCS6A02G299200	2098.36	865.672	3331.05	3.84794	1.94409	0.00865511	0.0819407	Up	35.8827	22.621	18.7107	61.7718	136.965	102.427	PYD1		GO:0005737,GO:0003824,GO:0055114,GO:0016627	cytoplasm|catalytic activity|oxidation-reduction process|oxidoreductase activity, acting on the CH-CH group of donors	ko00770,ko00240,ko00983,ko00410	Pantothenate and CoA biosynthesis|Pyrimidine metabolism|Drug metabolism - other enzymes|beta-Alanine metabolism
883	TraesCS3A02G244600	271.499	111.979	431.019	3.84911	1.94452	0.0181311	0.134415	Up	2.7636	3.01353	2.97949	11.282	13.2515	7.41499	At1g74320				ko00564	Glycerophospholipid metabolism
884	TraesCS7B02G255800	110.463	45.5578	175.368	3.84936	1.94462	0.0158055	0.122586	Up	0.760548	0.837416	1.32114	4.47933	2.79208	3.67714	FATB1	Acyl-[acyl-carrier-protein] hydrolase [Source:UniProtKB/TrEMBL;Acc:A0A1D6C7W2]	GO:0006633,GO:0009507,GO:0016790,GO:0016297,GO:0000036	fatty acid biosynthetic process|chloroplast|thiolester hydrolase activity|acyl-[acyl-carrier-protein] hydrolase activity|acyl carrier activity	ko00061,ko01212	Fatty acid biosynthesis|Fatty acid metabolism
885	TraesCS1A02G226300	151.313	62.4052	240.222	3.84939	1.94463	0.0229407	0.156981	Up	2.2399	1.92945	2.37302	8.69087	10.0267	4.71097	NDT1		GO:0022857,GO:0055085,GO:0016021,GO:0005739,GO:0051724,GO:0031969	transmembrane transporter activity|transmembrane transport|integral component of membrane|mitochondrion|NAD transmembrane transporter activity|chloroplast membrane
886	TraesCS2D02G553000	292.16	120.493	463.827	3.84941	1.94464	0.0194846	0.14075	Up	2.01751	1.53669	1.35362	6.09793	6.5088	4.01239	VPS41	Vacuolar protein sorting-associated protein 41 homolog [Source:UniProtKB/TrEMBL;Acc:A0A1D5US33]	GO:0006886,GO:0016192,GO:0046907,GO:0005515,GO:0009630,GO:0042144,GO:0035542,GO:0033263,GO:0030897,GO:0005770,GO:0015031	intracellular protein transport|vesicle-mediated transport|intracellular transport|protein binding|gravitropism|vacuole fusion, non-autophagic|regulation of SNARE complex assembly|CORVET complex|HOPS complex|late endosome|protein transport
887	TraesCS1B02G427700	281.217	115.979	446.455	3.84946	1.94466	0.0208077	0.146851	Up	9.06888	8.17241	6.66562	33.0961	35.7244	18.2385	At1g29970		GO:0016021	integral component of membrane
888	TraesCS5D02G387900	53.069	21.8865	84.2515	3.84948	1.94466	0.0314814	0.191681	Up	0.52487	0.399542	1.68748	4.87343	4.0989	2.53516	CIPK7	Non-specific serine/threonine protein kinase [Source:UniProtKB/TrEMBL;Acc:A0A1D5ZQ44]	GO:0005524,GO:0004672,GO:0004674,GO:0007165,GO:0006468	ATP binding|protein kinase activity|protein serine/threonine kinase activity|signal transduction|protein phosphorylation
889	TraesCS1B02G272600	25.8723	10.6682	41.0764	3.85036	1.94499	0.0427545	0.232613	Up	0.527337	0.409262	0.271674	1.40326	1.85468	1.35999	NAC035		GO:0005634,GO:0003677,GO:0006355	nucleus|DNA binding|regulation of transcription, DNA-templated
890	TraesCS5B02G502700	890.551	367.159	1413.94	3.85104	1.94525	0.00280201	0.0378109	Up	9.71084	7.8567	5.75752	16.7328	25.036	52.3735	ASA1		GO:0009058,GO:0000162,GO:0004049	biosynthetic process|tryptophan biosynthetic process|anthranilate synthase activity	ko01230,ko02024,ko00400	Biosynthesis of amino acids|Quorum sensing|Phenylalanine, tyrosine and tryptophan biosynthesis
891	TraesCS3D02G042600	154.354	63.6339	245.075	3.85133	1.94536	0.0224375	0.1547	Up	1.35436	1.59633	1.68471	6.93417	6.60468	3.73935	Os01g0970400		GO:0005737,GO:0003723,GO:0003743,GO:0006413	cytoplasm|RNA binding|translation initiation factor activity|translational initiation	ko04066,ko03013,ko04151,ko04150	HIF-1 signaling pathway|RNA transport|PI3K-Akt signaling pathway|mTOR signaling pathway
892	TraesCS4B02G039100	133.882	55.1805	212.583	3.8525	1.94579	0.0208154	0.146866	Up	3.87266	4.01992	1.68741	10.0583	15.5032	8.72277
893	TraesCS2A02G320400	375.327	154.648	596.005	3.85394	1.94634	0.01207	0.102529	Up	3.83974	2.66836	2.27211	9.39202	11.8878	9.96162	G6PDH	Glucose-6-phosphate 1-dehydrogenase [Source:UniProtKB/TrEMBL;Acc:A0A096ULE7]	GO:0055114,GO:0050661,GO:0006006,GO:0006098,GO:0004345,GO:0016491,GO:0005975,GO:0016614	oxidation-reduction process|NADP binding|glucose metabolic process|pentose-phosphate shunt|glucose-6-phosphate dehydrogenase activity|oxidoreductase activity|carbohydrate metabolic process|oxidoreductase activity, acting on CH-OH group of donors	ko01200,ko00480,ko00030	Carbon metabolism|Glutathione metabolism|Pentose phosphate pathway
894	TraesCS3D02G250800	155.921	64.2443	247.597	3.85399	1.94635	0.0304317	0.187831	Up	2.85977	1.61014	1.90016	10.6805	8.13816	5.12071	At3g02090		GO:0046872,GO:0004222,GO:0003824,GO:0006508	metal ion binding|metalloendopeptidase activity|catalytic activity|proteolysis
895	TraesCS1D02G133600	41.9225	17.2639	66.5811	3.85667	1.94735	0.0337296	0.200121	Up	1.27532	0.646877	0.344773	3.07841	3.00099	2.13789
896	TraesCS3B02G194100	76.686	31.579	121.793	3.85677	1.94739	0.0343311	0.202374	Up	0.949491	0.972209	1.19796	5.31984	5.89944	1.9478
897	TraesCS1A02G095600	40.5738	16.7019	64.4457	3.85858	1.94807	0.0130189	0.107643	Up	0.200374	0.0973474	1.70741	1.67819	3.48184	3.75556	At5g64700	WAT1-related protein [Source:UniProtKB/TrEMBL;Acc:W4ZWK7]	GO:0016021,GO:0022857,GO:0016020	integral component of membrane|transmembrane transporter activity|membrane
898	TraesCS2B02G491000	3842.02	1581.53	6102.51	3.85863	1.94809	0.0178127	0.132953	Up	61.204	36.2646	44.0286	236.553	268.349	122.987			GO:0046872,GO:0016491,GO:0055114,GO:0004097,GO:0046148	metal ion binding|oxidoreductase activity|oxidation-reduction process|catechol oxidase activity|pigment biosynthetic process	ko00950,ko00350	Isoquinoline alkaloid biosynthesis|Tyrosine metabolism
899	TraesCS2D02G541900	44.4954	18.3122	70.6786	3.85964	1.94847	0.0436948	0.23568	Up	0.872146	0.41606	0.281658	2.54328	1.15949	1.82107	At5g50100		GO:0015035,GO:0005739,GO:0042246,GO:0055114	protein disulfide oxidoreductase activity|mitochondrion|tissue regeneration|oxidation-reduction process
900	TraesCS6D02G093400	30.0442	12.364	47.7245	3.85997	1.94859	0.0104405	0.0929341	Up	0.370149	0.402249	0.372474	0.575648	1.4626	2.67503	IQM3		GO:0005515	protein binding
901	TraesCS3B02G068900	373.424	153.599	593.25	3.86234	1.94948	0.0191106	0.139038	Up	5.31017	6.49024	6.51644	27.1407	35.4663	13.7731	DIVARICATA		GO:0005634,GO:0003677	nucleus|DNA binding
902	TraesCS2D02G490300	109.857	45.179	174.535	3.86318	1.94979	0.0231975	0.15817	Up	1.65864	0.855409	1.80964	5.72545	5.90448	3.65799
903	TraesCS4A02G313600	226.172	93.0086	359.336	3.86347	1.9499	0.0225858	0.155269	Up	5.51533	3.91002	2.72111	18.6601	18.1719	9.59207	UBC4	Ubiquitin-conjugating enzyme E2-23 kDa [Source:UniProtKB/Swiss-Prot;Acc:P16577]	GO:0005524,GO:0016740,GO:0016567,GO:0000166	ATP binding|transferase activity|protein ubiquitination|nucleotide binding	ko04120	Ubiquitin mediated proteolysis
904	TraesCS3B02G008700	544.525	223.88	865.169	3.86443	1.95026	0.0191653	0.139355	Up	4.76434	4.61465	5.71011	19.9534	25.7455	11.0274	At5g47720		GO:0016747,GO:0003824,GO:0016740,GO:0016746	transferase activity, transferring acyl groups other than amino-acyl groups|catalytic activity|transferase activity|transferase activity, transferring acyl groups	ko00900,ko01200,ko00071,ko00380,ko00310,ko00072,ko00620,ko00630,ko00720,ko00280,ko02020,ko01212,ko00650,ko00640,ko00362	Terpenoid backbone biosynthesis|Carbon metabolism|Fatty acid degradation|Tryptophan metabolism|Lysine degradation|Synthesis and degradation of ketone bodies|Pyruvate metabolism|Glyoxylate and dicarboxylate metabolism|Carbon fixation pathways in prokaryotes|Valine, leucine and isoleucine degradation|Two-component system|Fatty acid metabolism|Butanoate metabolism|Propanoate metabolism|Benzoate degr…
905	TraesCS1D02G199300	272.131	111.88	432.382	3.8647	1.95036	0.0178917	0.133319	Up	6.42517	4.66082	3.3446	22.0348	24.2383	13.0825	XTH28	Xyloglucan endotransglucosylase/hydrolase [Source:UniProtKB/TrEMBL;Acc:A0A341PJL2]	GO:0004553,GO:0005975,GO:0005618,GO:0010411,GO:0016762,GO:0042546,GO:0048046,GO:0006073	hydrolase activity, hydrolyzing O-glycosyl compounds|carbohydrate metabolic process|cell wall|xyloglucan metabolic process|xyloglucan:xyloglucosyl transferase activity|cell wall biogenesis|apoplast|cellular glucan metabolic process
906	TraesCS2A02G182700	136.787	56.2278	217.345	3.86545	1.95064	0.0207355	0.146574	Up	1.60667	1.23288	1.34578	4.47141	6.45517	3.31442	WRKY3		GO:0003700,GO:0043565,GO:0006355	DNA-binding transcription factor activity|sequence-specific DNA binding|regulation of transcription, DNA-templated
907	TraesCS7B02G278900	47.4018	19.4838	75.3198	3.86576	1.95075	0.0413678	0.227825	Up	0.190557	0.174589	0.176835	0.642517	1.0477	0.343453	RDR3	RNA-dependent RNA polymerase [Source:UniProtKB/TrEMBL;Acc:A0A341YY57]	GO:0003968	RNA-directed 5'-3' RNA polymerase activity
908	TraesCS5A02G268100	327.283	134.506	520.06	3.86643	1.951	0.0293417	0.183867	Up	2.35511	2.21817	3.19881	12.03	8.8439	5.55078			GO:0005524,GO:0006457,GO:0051082	ATP binding|protein folding|unfolded protein binding
909	TraesCS7B02G364100	36.1766	14.8639	57.4893	3.8677	1.95148	0.0409051	0.226145	Up	0.403986	0.399786	0.345764	1.67264	1.78746	1.04082	CRPK1		GO:0005524,GO:0004672,GO:0006468	ATP binding|protein kinase activity|protein phosphorylation
910	TraesCS3D02G255900	296.689	121.888	471.491	3.86823	1.95167	0.0195976	0.141312	Up	1.79563	1.31393	1.1961	5.4417	4.7677	3.64272	SFH6		GO:0016021	integral component of membrane
911	TraesCS2D02G219800	133.589	54.878	212.3	3.86858	1.9518	0.0240391	0.161775	Up	1.56333	1.09039	1.82991	7.2668	6.68759	3.33524	LECRK41		GO:0016021,GO:0030246,GO:0005524,GO:0004672,GO:0006468,GO:0004674,GO:0016020,GO:0000166	integral component of membrane|carbohydrate binding|ATP binding|protein kinase activity|protein phosphorylation|protein serine/threonine kinase activity|membrane|nucleotide binding
912	TraesCS6B02G389200	1282.26	526.666	2037.85	3.86934	1.95209	0.0165768	0.126764	Up	13.3131	9.24787	12.293	49.9242	54.9992	30.8013	Os02g0794700		GO:0005737,GO:0030145,GO:0005622,GO:0004177,GO:0019538,GO:0008235,GO:0006508	cytoplasm|manganese ion binding|intracellular|aminopeptidase activity|protein metabolic process|metalloexopeptidase activity|proteolysis
913	TraesCS2D02G291100	277.352	113.879	440.824	3.871	1.95271	0.0181438	0.134485	Up	3.42065	2.14134	1.88807	11.2889	9.26437	7.50102	NIN3		GO:0003824,GO:0033926	catalytic activity|glycopeptide alpha-N-acetylgalactosaminidase activity
914	TraesCS6A02G035800	330.079	135.445	524.712	3.87397	1.95381	0.0212855	0.148989	Up	6.09746	5.95013	4.47841	27.1051	24.6149	13.3028			GO:0003676,GO:0003723	nucleic acid binding|RNA binding
915	TraesCS4D02G074000	115.196	47.2676	183.125	3.87422	1.95391	0.0259954	0.170849	Up	1.76114	1.89739	1.69776	8.00849	6.894	3.98907	APRF1		GO:0005737,GO:0005634,GO:0009827,GO:0005515	cytoplasm|nucleus|plant-type cell wall modification|protein binding	ko03015	mRNA surveillance pathway
916	TraesCS2A02G323300	97.8191	40.1343	155.504	3.87458	1.95404	0.00641411	0.0670394	Up	3.67065	2.54602	2.23622	9.46515	10.4404	17.3362	MSRA2-1		GO:0055114,GO:0008113	oxidation-reduction process|peptide-methionine (S)-S-oxide reductase activity
917	TraesCS5A02G258100	347.356	142.495	552.216	3.87535	1.95433	0.0457234	0.24255	Up	3.46619	2.02821	2.37422	11.1897	11.867	4.27976	WRKY2		GO:0003700,GO:0043565,GO:0005634,GO:0006355	DNA-binding transcription factor activity|sequence-specific DNA binding|nucleus|regulation of transcription, DNA-templated
918	TraesCS6B02G285600	293.582	120.424	466.741	3.87581	1.9545	0.0168314	0.128148	Up	3.91228	3.01814	3.47498	13.1021	21.9602	9.39632	ATG13A		GO:0006914,GO:1990316,GO:0000045	autophagy|Atg1/ULK1 kinase complex|autophagosome assembly	ko04140	Regulation of autophagy
919	TraesCS1B02G277600	62.8751	25.7889	99.9613	3.87614	1.95462	0.019073	0.138942	Up	2.08589	2.91399	1.1536	11.3034	9.50166	7.80889			GO:0016021	integral component of membrane
920	TraesCS6A02G350700	134.618	55.2132	214.022	3.87629	1.95467	0.019395	0.140462	Up	8.77847	1.26546	1.93992	11.9186	22.9588	11.2125	DHN3	Dehydrin WZY2 [Source:UniProtKB/TrEMBL;Acc:B0LXL4]	GO:0009415	response to water
921	TraesCS3D02G457600	66.288	27.1863	105.39	3.87657	1.95478	0.0153879	0.12039	Up	0	0	0	0	0	0
922	TraesCS3B02G407500	29.4476	12.0761	46.8191	3.87702	1.95495	0.0435447	0.235251	Up	0.860003	0.421483	1.17797	4.88498	4.37291	3.37588
923	TraesCS6D02G070000	52.0519	21.3443	82.7595	3.87736	1.95508	0.0428235	0.232878	Up	0.495065	0.539054	0.419694	1.7558	2.31075	0.760204	STY46		GO:0005524,GO:0004672,GO:0006468	ATP binding|protein kinase activity|protein phosphorylation
924	TraesCS4D02G322000	1776.79	728.383	2825.2	3.87873	1.95559	0.0194698	0.140708	Up	44.6232	28.5019	35.8645	155.507	161.412	82.0795	HIR1	Hypersensitive response protein [Source:UniProtKB/TrEMBL;Acc:A5HE90]
925	TraesCS1B02G179500	460.917	188.929	732.904	3.87926	1.95578	0.0458364	0.242881	Up	2.71583	2.07312	1.62972	9.56159	10.0787	3.69742	VIII-1		GO:0005524,GO:0003774,GO:0016459,GO:0051015,GO:0005515,GO:0003779	ATP binding|motor activity|myosin complex|actin filament binding|protein binding|actin binding
926	TraesCS6A02G085200	61.2966	25.1235	97.4697	3.87962	1.95592	0.0260225	0.170964	Up	1.81526	3.08059	1.32071	9.5818	9.24397	6.95729	RTNLB23
927	TraesCS7B02G434100	692.787	283.931	1101.64	3.87997	1.95605	0.0173088	0.130548	Up	9.42705	8.30453	8.96404	35.062	37.652	21.0405	ACPEPP	Purple acid phosphatase [Source:UniProtKB/TrEMBL;Acc:A0A1D6C5P9]	GO:0046872,GO:0016787,GO:0003993,GO:0016311	metal ion binding|hydrolase activity|acid phosphatase activity|dephosphorylation
928	TraesCS3A02G228200	230.925	94.5989	367.25	3.88218	1.95687	0.0118777	0.101428	Up	3.7261	2.04944	1.92293	9.50189	10.6491	9.63199	CYP72A13		GO:0020037,GO:0004497,GO:0005506,GO:0016705,GO:0055114	heme binding|monooxygenase activity|iron ion binding|oxidoreductase activity, acting on paired donors, with incorporation or reduction of molecular oxygen|oxidation-reduction process
929	TraesCS2A02G583800	427.661	175.16	680.161	3.88308	1.9572	0.0207214	0.146548	Up	3.96709	3.20848	3.53689	15.6752	15.402	8.09972	EXO70A1	Exocyst subunit Exo70 family protein [Source:UniProtKB/TrEMBL;Acc:A0A1D5T8M2]	GO:0015031,GO:0000145,GO:0006887	protein transport|exocyst|exocytosis
930	TraesCS3D02G343800	636.933	260.838	1013.03	3.88374	1.95745	0.0482746	0.250482	Up	10.158	5.18945	6.67437	38.8478	30.9876	14.7662	ABCI8		GO:0016226	iron-sulfur cluster assembly
931	TraesCS5A02G163600	400.921	164.166	637.676	3.88434	1.95767	0.0326778	0.196349	Up	5.89034	2.97945	1.8233	14.5174	13.122	7.01648
932	TraesCS4A02G180000	157.162	64.349	249.975	3.88468	1.9578	0.0227346	0.155943	Up	2.47686	1.5526	1.15882	7.47502	7.64312	4.23995
933	TraesCS3B02G197300	46.1408	18.8763	73.4052	3.88874	1.9593	0.0239352	0.161372	Up	0.659168	0.286622	0.460066	1.12639	2.1671	1.31822	At5g54860		GO:0016021,GO:0016020	integral component of membrane|membrane
934	TraesCS3B02G337700	376.715	154.1	599.331	3.88923	1.95948	0.0325524	0.195843	Up	3.1751	2.64322	3.23068	14.8315	13.898	6.2177	NPR2		GO:0005515	protein binding	ko04075	Plant hormone signal transduction
935	TraesCS6A02G129100	221.631	90.586	352.676	3.89327	1.96098	0.0309369	0.189866	Up	3.23286	3.41818	3.19052	18.1307	16.519	7.27824	OR23		GO:0005515	protein binding
936	TraesCS2B02G217300	34.6605	14.1526	55.1683	3.89811	1.96277	0.0302419	0.187078	Up	0.411852	0.103086	0.214822	1.03418	1.02188	1.26853	Os10g0369500	Protein yippee-like [Source:UniProtKB/TrEMBL;Acc:A0A1D6DLC9]	GO:0046872	metal ion binding
937	TraesCS5A02G192500	234.812	95.8573	373.766	3.8992	1.96318	0.0146431	0.116545	Up	5.26852	5.83688	4.65195	19.9232	20.0898	15.1728
938	TraesCS3D02G005500	350.149	142.914	557.383	3.90014	1.96352	0.0189808	0.138535	Up	3.98376	5.23478	5.94823	25.4593	25.1657	11.8565	At5g47720		GO:0016747,GO:0003824	transferase activity, transferring acyl groups other than amino-acyl groups|catalytic activity	ko00900,ko01200,ko00071,ko00380,ko00310,ko00072,ko00620,ko00630,ko00720,ko00280,ko02020,ko01212,ko00650,ko00640,ko00362	Terpenoid backbone biosynthesis|Carbon metabolism|Fatty acid degradation|Tryptophan metabolism|Lysine degradation|Synthesis and degradation of ketone bodies|Pyruvate metabolism|Glyoxylate and dicarboxylate metabolism|Carbon fixation pathways in prokaryotes|Valine, leucine and isoleucine degradation|Two-component system|Fatty acid metabolism|Butanoate metabolism|Propanoate metabolism|Benzoate degr…
939	TraesCS1B02G030800	532.592	217.377	847.807	3.90017	1.96354	0.00952661	0.0874424	Up	0.637468	2.39748	2.81593	7.67848	7.55442	7.49479	ABCD1		GO:0016021,GO:0005524,GO:0042626,GO:0055085,GO:0016887	integral component of membrane|ATP binding|ATPase-coupled transmembrane transporter activity|transmembrane transport|ATPase activity
940	TraesCS7B02G286900	296.341	120.888	471.794	3.90274	1.96449	0.0188996	0.138169	Up	3.05369	3.50253	3.4381	12.9647	12.8373	7.89581	At3g51130
941	TraesCS1B02G129300	828.392	337.789	1319	3.90479	1.96525	0.0132771	0.109226	Up	6.54325	10.993	11.4082	35.6476	47.66	26.9977	ACX4		GO:0055114,GO:0016627,GO:0050660,GO:0003995,GO:0016491	oxidation-reduction process|oxidoreductase activity, acting on the CH-CH group of donors|flavin adenine dinucleotide binding|acyl-CoA dehydrogenase activity|oxidoreductase activity	ko04024,ko00592,ko00071,ko04146,ko01040,ko01212	cAMP signaling pathway|alpha-Linolenic acid metabolism|Fatty acid degradation|Peroxisome|Biosynthesis of unsaturated fatty acids|Fatty acid metabolism
942	TraesCS2A02G112400	161.618	65.8969	257.34	3.90519	1.96539	0.0213983	0.149582	Up	2.74753	3.35986	3.07115	14.8998	15.9834	8.51715	PHOS34
943	TraesCS3A02G422200	41.4082	16.8826	65.9338	3.90543	1.96548	0.0370301	0.212556	Up	0.541222	0.58865	0.793969	2.81769	3.8791	1.72678	At1g06620		GO:0016491,GO:0055114	oxidoreductase activity|oxidation-reduction process
944	TraesCS5B02G539200	19.2115	7.83121	30.5918	3.9064	1.96584	0.0477649	0.24883	Up	0.481687	2.94343	0.224893	1.45407	10.99	6.02002	At5g65660
945	TraesCS5B02G355100	81.8445	33.362	130.327	3.90644	1.96586	0.0168737	0.128385	Up	1.92472	0.853659	0.559367	4.98666	2.8176	4.17379	dsk1		GO:0005524,GO:0004672,GO:0004674,GO:0006468	ATP binding|protein kinase activity|protein serine/threonine kinase activity|protein phosphorylation
946	TraesCS1D02G350000	98.5672	40.1763	156.958	3.90673	1.96596	0.0144463	0.115534	Up	1.44283	1.16073	1.51984	5.05963	7.63429	5.40381	RhGT1	Glycosyltransferase [Source:UniProtKB/TrEMBL;Acc:A0A1D5SS62]	GO:0016758	transferase activity, transferring hexosyl groups
947	TraesCS7D02G387300	138.691	56.5283	220.855	3.90698	1.96605	0.0423353	0.231244	Up	2.18356	1.71356	1.44739	10.2462	8.29865	4.19192	RING1
948	TraesCS3B02G133900	149.268	60.8255	237.711	3.90808	1.96646	0.00749383	0.0743194	Up	2.26913	2.42879	2.50993	10.0464	10.0077	13.5236	AMC1
949	TraesCS1B02G152500	77.0275	31.3672	122.688	3.91133	1.96766	0.0236161	0.160017	Up	1.87421	0.420067	1.2042	4.46548	2.96693	3.35053	SPAC25B8.05	tRNA pseudouridine synthase [Source:UniProtKB/TrEMBL;Acc:A0A341P1J8]	GO:0003723,GO:0001522,GO:0009982,GO:0009451	RNA binding|pseudouridine synthesis|pseudouridine synthase activity|RNA modification
950	TraesCS1D02G236800	406.469	165.514	647.425	3.91161	1.96776	0.0121328	0.102941	Up	4.33865	2.91368	1.9163	9.80775	13.2601	9.69634	DGK1	Diacylglycerol kinase [Source:UniProtKB/TrEMBL;Acc:A0A1D5SSQ9]	GO:0016021,GO:0005524,GO:0005622,GO:0007165,GO:0016301,GO:0003951,GO:0035556,GO:0004143,GO:0007205	integral component of membrane|ATP binding|intracellular|signal transduction|kinase activity|NAD+ kinase activity|intracellular signal transduction|diacylglycerol kinase activity|protein kinase C-activating G protein-coupled receptor signaling pathway
951	TraesCS5A02G161500	397.346	161.746	632.946	3.9132	1.96835	0.0120765	0.102572	Up	2.88433	2.28483	3.33052	11.9894	15.9162	9.85384	LECRKS2		GO:0005524,GO:0004672,GO:0005886,GO:0004674,GO:0009611,GO:0009617,GO:0071446,GO:0071395,GO:0006468	ATP binding|protein kinase activity|plasma membrane|protein serine/threonine kinase activity|response to wounding|response to bacterium|cellular response to salicylic acid stimulus|cellular response to jasmonic acid stimulus|protein phosphorylation
952	TraesCS1A02G082000	1007.07	409.803	1604.33	3.91489	1.96897	0.0159139	0.123204	Up	13.224	9.59027	13.6844	47.1796	53.2232	29.4295	RAP		GO:0006629,GO:0004190,GO:0006508,GO:0016787,GO:0008233	lipid metabolic process|aspartic-type endopeptidase activity|proteolysis|hydrolase activity|peptidase activity
953	TraesCS2A02G286100	24.6275	10.0207	39.2343	3.91531	1.96913	0.037468	0.214073	Up	0.252976	0	0	0.454263	0.524183	0.529092
954	TraesCS1A02G217300	1160.21	472.055	1848.37	3.91557	1.96922	0.0153844	0.12039	Up	31.4145	17.9531	18.2538	108.284	113.029	61.6581	MSRA4		GO:0055114,GO:0008113	oxidation-reduction process|peptide-methionine (S)-S-oxide reductase activity
955	TraesCS5B02G306500	267.134	108.686	425.582	3.91569	1.96926	0.0118114	0.101009	Up	5.53468	3.88506	7.11337	23.1238	35.6928	19.9642
956	TraesCS3B02G214700	80.8234	32.8711	128.776	3.91761	1.96997	0.0097916	0.0888666	Up	0.846895	0.368692	0.513465	1.48804	3.39588	2.76337	agdD		GO:0004553,GO:0005975,GO:0030246,GO:0003824	hydrolase activity, hydrolyzing O-glycosyl compounds|carbohydrate metabolic process|carbohydrate binding|catalytic activity
957	TraesCS3D02G321200	422.017	171.61	672.423	3.91833	1.97024	0.0197163	0.141908	Up	9.19726	6.3392	7.80179	32.1389	33.7142	16.8814	AIM1		GO:0016491,GO:0055114,GO:0006631,GO:0005777,GO:0003857,GO:0070403	oxidoreductase activity|oxidation-reduction process|fatty acid metabolic process|peroxisome|3-hydroxyacyl-CoA dehydrogenase activity|NAD+ binding	ko00650,ko00362,ko00360	Butanoate metabolism|Benzoate degradation|Phenylalanine metabolism
958	TraesCS2A02G101900	221.94	90.2446	353.636	3.91864	1.97035	0.0183929	0.135657	Up	5.70229	3.37339	4.18248	17.8034	29.7306	11.2554	NAM-B1		GO:0005634,GO:0003677,GO:0006355	nucleus|DNA binding|regulation of transcription, DNA-templated
959	TraesCS1D02G346200	509.181	207.024	811.338	3.91905	1.9705	0.0330188	0.197582	Up	5.29759	4.02221	4.86894	22.5704	16.423	11.1019	PFK3	ATP-dependent 6-phosphofructokinase [Source:UniProtKB/TrEMBL;Acc:A0A1D5SZG4]	GO:0046872,GO:0005737,GO:0005524,GO:0006096,GO:0006002,GO:0003872	metal ion binding|cytoplasm|ATP binding|glycolytic process|fructose 6-phosphate metabolic process|6-phosphofructokinase activity	ko00680,ko03018,ko00052,ko01200,ko04152,ko01230,ko00030,ko00051,ko00010	Methane metabolism|RNA degradation|Galactose metabolism|Carbon metabolism|AMPK signaling pathway|Biosynthesis of amino acids|Pentose phosphate pathway|Fructose and mannose metabolism|Glycolysis / Gluconeogenesis
960	TraesCS1B02G279900	12.3005	4.99994	19.6012	3.92028	1.97096	0.0413135	0.227633	Up	0.215505	0.247179	0.102881	0.576265	1.09684	1.61584	NPF5.10		GO:0016021,GO:0006857,GO:0022857,GO:0016020,GO:0055085,GO:0005215	integral component of membrane|oligopeptide transport|transmembrane transporter activity|membrane|transmembrane transport|transporter activity
961	TraesCS2B02G336000	292.719	118.98	466.459	3.92049	1.97103	0.00557199	0.0608663	Up	5.43232	6.10551	8.38314	17.0105	29.4246	32.8235	dfr1
962	TraesCS4B02G293700	49.2649	20.0221	78.5076	3.92104	1.97124	0.0335896	0.199587	Up	2.41016	1.68331	2.16434	9.25367	10.859	5.28898	YLMG2		GO:0016020	membrane
963	TraesCS4B02G302500	179.229	72.8381	285.619	3.92129	1.97133	0.0222551	0.153853	Up	1.12804	0.847554	1.49052	4.75418	4.10479	2.46131
964	TraesCS6B02G281600	218.694	88.8085	348.58	3.92508	1.97272	0.0249359	0.166107	Up	3.0547	2.16677	2.13184	9.27991	15.1525	5.30274	At4g16800		GO:0003824	catalytic activity	ko00280	Valine, leucine and isoleucine degradation
965	TraesCS4A02G086600	200.964	81.6052	320.323	3.92527	1.97279	0.0193122	0.14006	Up	0.802023	0.739635	1.35513	4.02038	5.71337	2.28856	MYOB2		GO:0017022	myosin binding
966	TraesCS2B02G395900	45.8813	18.6302	73.1325	3.92548	1.97287	0.032651	0.196237	Up	0.416161	2.1367	1.388	5.32974	6.80463	3.17872	PNSL3		GO:0005509,GO:0015979,GO:0009523,GO:0009654,GO:0019898	calcium ion binding|photosynthesis|photosystem II|photosystem II oxygen evolving complex|extrinsic component of membrane
967	TraesCS2A02G180200	1185.94	481.424	1890.45	3.92678	1.97335	0.012307	0.103867	Up	18.6133	15.8256	17.7595	65.2307	77.0166	50.0792	ARB_05372	Aldose 1-epimerase [Source:UniProtKB/TrEMBL;Acc:A0A096ULQ1]	GO:0005975,GO:0030246,GO:0003824,GO:0016853,GO:0019318,GO:0048046,GO:0005829,GO:0004034	carbohydrate metabolic process|carbohydrate binding|catalytic activity|isomerase activity|hexose metabolic process|apoplast|cytosol|aldose 1-epimerase activity	ko00052,ko00010	Galactose metabolism|Glycolysis / Gluconeogenesis
968	TraesCS5A02G337100	454.313	184.378	724.247	3.92804	1.97381	0.0180215	0.13395	Up	5.05039	2.95618	2.29236	15.0875	12.6288	8.76132	PLDDELTA	Phospholipase D [Source:UniProtKB/TrEMBL;Acc:A0A1D5YJ31]	GO:0005509,GO:0003824,GO:0016020,GO:0004630,GO:0046470,GO:0005886,GO:0016042,GO:0046473,GO:0012501,GO:0090333,GO:0009409,GO:0070290,GO:0009789,GO:0009506,GO:0005773	calcium ion binding|catalytic activity|membrane|phospholipase D activity|phosphatidylcholine metabolic process|plasma membrane|lipid catabolic process|phosphatidic acid metabolic process|programmed cell death|regulation of stomatal closure|response to cold|N-acylphosphatidylethanolamine-specific phospholipase D activity|positive regulation of abscisic acid-activated signaling pathway|plasmodesma|…	ko00564,ko04024,ko04144,ko00565,ko04072,ko04014,ko04071	Glycerophospholipid metabolism|cAMP signaling pathway|Endocytosis|Ether lipid metabolism|Phospholipase D signaling pathway|Ras signaling pathway|Sphingolipid signaling pathway
969	TraesCS1D02G174700	101.319	41.118	161.52	3.92819	1.97387	0.0212026	0.148604	Up	0.468994	0.530177	0.551148	2.01753	1.95155	1.2781	RPS27AA		GO:0003735,GO:0006412,GO:0005840,GO:0005515	structural constituent of ribosome|translation|ribosome|protein binding	ko03010	Ribosome
970	TraesCS1B02G151900	336.504	136.548	536.46	3.92874	1.97407	0.0376791	0.214911	Up	3.97009	2.24937	2.79993	12.405	14.1611	5.47021	ABC1K3		GO:0005524,GO:0004672,GO:0006468	ATP binding|protein kinase activity|protein phosphorylation
971	TraesCS7A02G056300	761.401	308.927	1213.88	3.92933	1.97428	0.0145302	0.116005	Up	20.4727	12.5942	17.1497	58.7672	78.0878	43.4054	PEX11-5		GO:0005779,GO:0016559	integral component of peroxisomal membrane|peroxisome fission
972	TraesCS2D02G331300	554.219	224.85	883.589	3.92967	1.97441	0.0177858	0.132839	Up	17.5635	12.5407	7.9212	50.4693	50.8922	28.5195	RAB2A	Small GTP-binding protein [Source:UniProtKB/TrEMBL;Acc:Q5I5K7]	GO:0005525,GO:0003924	GTP binding|GTPase activity	ko04152	AMPK signaling pathway
973	TraesCS2D02G034400	3126.11	1268.04	4984.18	3.93062	1.97476	0.0167416	0.127671	Up	181.703	94.846	93.7263	630.161	598.533	314.465	CP12-2
974	TraesCS5D02G418900	289.3	117.297	461.304	3.93279	1.97555	0.0157083	0.122163	Up	4.27551	3.85076	3.61211	16.9957	15.833	11.5948	At1g01500		GO:0016021	integral component of membrane
975	TraesCS5B02G266600	253.179	102.648	403.711	3.93296	1.97562	0.0221422	0.153282	Up	3.86989	3.03695	2.09473	15.111	16.1207	6.62616	AHL10		GO:0003680	AT DNA binding
976	TraesCS2B02G446235	22.1143	8.96565	35.2629	3.9331	1.97567	0.0348941	0.204583	Up	0.461186	0.289572	0.468648	1.74351	2.04793	2.30055	CAT8		GO:0022857,GO:0016020,GO:0055085	transmembrane transporter activity|membrane|transmembrane transport
977	TraesCS7A02G537100	475.564	192.786	758.341	3.93358	1.97584	0.0144573	0.115588	Up	11.7518	7.13006	7.53261	35.2334	54.0334	25.7603	OPR1		GO:0016491,GO:0003824,GO:0010181,GO:0055114	oxidoreductase activity|catalytic activity|FMN binding|oxidation-reduction process	ko00592	alpha-Linolenic acid metabolism
978	TraesCS5D02G379500	312.032	126.466	497.598	3.93465	1.97623	0.02053	0.145648	Up	5.84401	3.87686	4.16365	23.8728	21.9599	10.9354			GO:0005515	protein binding
979	TraesCS3B02G039600	986.106	399.443	1572.77	3.93741	1.97725	0.00737146	0.073415	Up	19.7286	8.27792	10.1558	37.7137	64.8152	53.3843	ENDO2		GO:0003676,GO:0016788,GO:0004519,GO:0006308,GO:0090305	nucleic acid binding|hydrolase activity, acting on ester bonds|endonuclease activity|DNA catabolic process|nucleic acid phosphodiester bond hydrolysis
980	TraesCS3B02G038900	50.7687	20.5642	80.9731	3.93757	1.97731	0.0264498	0.172659	Up	0.827292	0.402846	0.430518	2.47151	2.95997	1.77696	CRK41		GO:0005524,GO:0004672,GO:0006468	ATP binding|protein kinase activity|protein phosphorylation
981	TraesCS1D02G126900	181.575	73.5055	289.644	3.94044	1.97836	0.0225836	0.155269	Up	4.58732	2.52284	2.01139	14.301	12.6201	7.13289	PYL5		GO:0005634,GO:0005829,GO:0009738,GO:0009651,GO:1905183,GO:0009845,GO:0009414	nucleus|cytosol|abscisic acid-activated signaling pathway|response to salt stress|negative regulation of protein serine/threonine phosphatase activity|seed germination|response to water deprivation	ko04075	Plant hormone signal transduction
982	TraesCS7B02G240700	194.592	78.7225	310.461	3.94374	1.97956	0.043798	0.236013	Up	2.90685	2.08775	1.7829	11.3536	9.90681	4.38438
983	TraesCS2B02G110400	149.463	60.4403	238.486	3.94581	1.98032	0.015317	0.120048	Up	3.8291	2.10788	2.12721	13.7251	17.624	14.1157
984	TraesCS2A02G450500	412.484	166.794	658.173	3.94602	1.9804	0.0363474	0.209976	Up	21.0669	19.4369	44.0124	154.869	154.347	59.0113
985	TraesCS5A02G515000	57.8801	23.3966	92.3635	3.94773	1.98102	0.0342149	0.202043	Up	0.365298	0.61305	0.818387	1.54553	4.68038	1.64393	HOS66		GO:0005634,GO:0003677,GO:0006355,GO:0010089,GO:0010192,GO:0045892,GO:2000652	nucleus|DNA binding|regulation of transcription, DNA-templated|xylem development|mucilage biosynthetic process|negative regulation of transcription, DNA-templated|regulation of secondary cell wall biogenesis
986	TraesCS6A02G368800	66.1773	26.7495	105.605	3.94793	1.98109	0.0187196	0.137229	Up	1.48851	1.53889	1.60762	7.19649	11.0364	6.2938
987	TraesCS7A02G446700	335.847	135.746	535.947	3.94815	1.98118	0.0143847	0.115163	Up	9.66056	7.40831	6.83788	42.119	32.6383	29.6117
988	TraesCS7B02G210600	339.394	137.161	541.628	3.94885	1.98143	0.0299215	0.186087	Up	3.05994	2.91917	3.98037	14.0093	11.0058	7.02145	WDR26		GO:0005515	protein binding
989	TraesCS1D02G046400	908.819	367.283	1450.35	3.94887	1.98144	0.0136554	0.111378	Up	13.5305	10.5663	22.4704	72.2841	82.9291	45.5418	GLUD1		GO:0045735	nutrient reservoir activity
990	TraesCS3B02G483700	46.3297	18.7183	73.9411	3.9502	1.98193	0.0446841	0.238973	Up	0	0.377472	0.58885	1.27073	1.45338	0.524615	RPM1		GO:0043531	ADP binding
991	TraesCS4B02G059700	50.0562	20.2214	79.8909	3.95082	1.98215	0.0273921	0.176212	Up	0.543064	0.512869	0.318327	1.98054	2.33786	1.355	At5g24080		GO:0005524,GO:0004672,GO:0004674,GO:0048544,GO:0006468	ATP binding|protein kinase activity|protein serine/threonine kinase activity|recognition of pollen|protein phosphorylation
992	TraesCS7D02G382500	513.973	207.615	820.331	3.95121	1.98229	0.016849	0.128246	Up	7.22151	4.63347	5.12291	27.8434	24.6649	15.1759			GO:0009639,GO:0009959	response to red or far red light|negative gravitropism
993	TraesCS5D02G328300	1167.76	471.703	1863.81	3.95124	1.98231	0.0426902	0.232421	Up	5.85076	5.31932	6.6967	27.1981	24.5732	11.3506	LON1	Lon protease homolog 2, peroxisomal [Source:UniProtKB/TrEMBL;Acc:A0A341W202]	GO:0005524,GO:0004252,GO:0030163,GO:0006515,GO:0004176,GO:0006508,GO:0005777,GO:0016887,GO:0005782,GO:0016787,GO:0000166,GO:0008233,GO:0008236,GO:0016485,GO:0016558,GO:0016560,GO:0048527,GO:0070013	ATP binding|serine-type endopeptidase activity|protein catabolic process|protein quality control for misfolded or incompletely synthesized proteins|ATP-dependent peptidase activity|proteolysis|peroxisome|ATPase activity|peroxisomal matrix|hydrolase activity|nucleotide binding|peptidase activity|serine-type peptidase activity|protein processing|protein import into peroxisome matrix|protein import …	ko04112	Cell cycle - Caulobacter
994	TraesCS3A02G312100	941.909	380.418	1503.4	3.95197	1.98257	0.0181885	0.134666	Up	13.018	11.2784	9.5597	57.4334	68.095	27.981	CSE
995	TraesCS7D02G003000	928.187	374.858	1481.52	3.95221	1.98266	0.0317554	0.192749	Up	8.46408	5.34052	3.68972	24.0838	25.6029	10.1741	ML2		GO:0003676,GO:0003723	nucleic acid binding|RNA binding
996	TraesCS6A02G144700	682.917	275.795	1090.04	3.95236	1.98271	0.0175927	0.131864	Up	8.14054	6.08473	7.1142	31.0652	28.2813	17.0032			GO:0005515	protein binding
997	TraesCSU02G266700	26.8464	10.8411	42.8517	3.95272	1.98284	0.0395303	0.221635	Up	2.60617	0	0.298273	0	0.722085	3.19833
998	TraesCS5B02G262500	58.9086	23.7781	94.0391	3.95486	1.98363	0.00831851	0.0797245	Up	0.713409	1.26784	0.45889	2.9949	3.11519	4.82983	TDT		GO:0016021,GO:0016020,GO:0055085,GO:0005215,GO:0006814	integral component of membrane|membrane|transmembrane transport|transporter activity|sodium ion transport
999	TraesCS5B02G372300	330.376	133.347	527.404	3.95514	1.98373	0.0179057	0.133386	Up	6.31881	4.59256	3.96282	21.8972	27.7716	12.4853			GO:0016021,GO:0005515	integral component of membrane|protein binding
1000	TraesCS3D02G216200	352.305	142.196	562.415	3.95522	1.98376	0.014667	0.116676	Up	3.13061	1.49364	2.16117	8.85152	8.38619	6.19365
1001	TraesCS5D02G399900	105.573	42.6065	168.54	3.95572	1.98394	0.0201338	0.143895	Up	2.43008	1.37797	3.07721	11.7422	10.483	6.9986
1002	TraesCS5B02G502200	247.617	99.9171	395.317	3.95645	1.98421	0.0127341	0.106232	Up	10.0429	3.50395	1.14232	15.1711	32.772	16.7862	At5g13200		GO:0009793,GO:0010029,GO:0098755,GO:0009845	embryo development ending in seed dormancy|regulation of seed germination|maintenance of seed dormancy by absisic acid|seed germination
1003	TraesCS4B02G078200	752.737	303.738	1201.74	3.95649	1.98422	0.0265001	0.172847	Up	12.9877	7.60161	8.32852	47.4738	36.3318	24.2831
1004	TraesCS5D02G191100	202.878	81.8521	323.904	3.95719	1.98448	0.0096588	0.0881466	Up	4.13074	2.5015	2.0036	11.5139	9.33062	12.995	NIFS1		GO:0030170,GO:0003824,GO:0031071,GO:0044571	pyridoxal phosphate binding|catalytic activity|cysteine desulfurase activity|[2Fe-2S] cluster assembly	ko00730,ko04122	Thiamine metabolism|Sulfur relay system
1005	TraesCS2A02G408200	1344.38	542.393	2146.37	3.95722	1.98449	0.0139678	0.113177	Up	22.646	15.8851	14.4046	72.6029	78.4667	43.3529	PU1		GO:0005515	protein binding
1006	TraesCS5A02G389100	37.5513	15.1494	59.9531	3.95745	1.98457	0.0284252	0.18034	Up	0.35171	0.627649	0.178788	1.97655	2.02871	1.38753	bglC		GO:0004553,GO:0005975	hydrolase activity, hydrolyzing O-glycosyl compounds|carbohydrate metabolic process	ko00940,ko00460,ko00500	Phenylpropanoid biosynthesis|Cyanoamino acid metabolism|Starch and sucrose metabolism
1007	TraesCS3A02G277700	264.45	106.685	422.214	3.95758	1.98462	0.0187307	0.137284	Up	2.54548	1.62647	1.2156	7.85387	8.37828	4.32972	PFK7	ATP-dependent 6-phosphofructokinase [Source:UniProtKB/TrEMBL;Acc:A0A1D5VB29]	GO:0046872,GO:0005737,GO:0005524,GO:0006096,GO:0006002,GO:0003872	metal ion binding|cytoplasm|ATP binding|glycolytic process|fructose 6-phosphate metabolic process|6-phosphofructokinase activity	ko00680,ko03018,ko00052,ko01200,ko04152,ko01230,ko00030,ko00051,ko00010	Methane metabolism|RNA degradation|Galactose metabolism|Carbon metabolism|AMPK signaling pathway|Biosynthesis of amino acids|Pentose phosphate pathway|Fructose and mannose metabolism|Glycolysis / Gluconeogenesis
1008	TraesCS2D02G524900	14.3866	5.80323	22.97	3.95814	1.98482	0.0401004	0.223563	Up	0	0	0	0	27.3699	28.7636
1009	TraesCS5B02G315600	166.075	66.9905	265.16	3.95817	1.98484	0.0218416	0.151741	Up	2.32987	1.64289	1.945	10.8455	10.545	5.09639	HSFB2B		GO:0016021,GO:0003700,GO:0043565,GO:0005634,GO:0006355	integral component of membrane|DNA-binding transcription factor activity|sequence-specific DNA binding|nucleus|regulation of transcription, DNA-templated
1010	TraesCS7A02G233500	635.007	256.117	1013.9	3.95871	1.98503	0.0116531	0.100209	Up	16.8692	9.16484	6.89519	42.0687	44.4661	36.7351	PCBER
1011	TraesCS1D02G216200	336.344	135.657	537.03	3.95872	1.98504	0.0415393	0.228385	Up	2.97283	2.10212	2.17327	11.9174	8.32749	5.7469	At1g26850		GO:0016021,GO:0008168,GO:0005774,GO:0009505,GO:0005802,GO:0005768	integral component of membrane|methyltransferase activity|vacuolar membrane|plant-type cell wall|trans-Golgi network|endosome
1012	TraesCS6A02G282400	20.4287	8.23894	32.6185	3.95907	1.98516	0.0400394	0.223348	Up	0.0897818	0.230425	0.593614	1.35295	1.69299	1.2104	GDI1		GO:0005737,GO:0005094	cytoplasm|Rho GDP-dissociation inhibitor activity
1013	TraesCS1D02G187700	264.451	106.632	422.269	3.96006	1.98552	0.0213684	0.149413	Up	5.87803	3.4792	3.19924	17.6762	22.6858	9.04121	PP2A13		GO:0005515	protein binding
1014	TraesCS5A02G264400	108.052	43.5618	172.543	3.96089	1.98582	0.0163931	0.125732	Up	1.65605	1.00934	1.1266	4.51478	5.93042	3.93125	PG9		GO:0005975,GO:0005576,GO:0004650,GO:0071555	carbohydrate metabolic process|extracellular region|polygalacturonase activity|cell wall organization
1015	TraesCS2A02G554900	49.4566	19.9359	78.9774	3.96157	1.98607	0.033672	0.199913	Up	0.996819	0.641052	0.901773	4.7809	3.7178	2.27365			GO:0016021	integral component of membrane
1016	TraesCS2D02G034900	1243.06	501.064	1985.07	3.9617	1.98612	0.012451	0.104611	Up	3.73083	3.22322	3.19643	11.9472	12.2434	9.46054	ARG1	Arginase [Source:UniProtKB/TrEMBL;Acc:G3LT25]	GO:0046872,GO:0006527,GO:0009507,GO:0050897,GO:0004053,GO:0033389,GO:0008783,GO:0042742,GO:0016813,GO:0016787	metal ion binding|arginine catabolic process|chloroplast|cobalt ion binding|arginase activity|putrescine biosynthetic process from arginine, using agmatinase|agmatinase activity|defense response to bacterium|hydrolase activity, acting on carbon-nitrogen (but not peptide) bonds, in linear amidines|hydrolase activity	ko01230,ko00330,ko00220	Biosynthesis of amino acids|Arginine and proline metabolism|Arginine biosynthesis
1017	TraesCS4B02G213400	1498.9	604.104	2393.7	3.96239	1.98637	0.0152498	0.119774	Up	15.0224	12.9921	12.7227	73.1931	61.5349	39.1924	SR45A		GO:0003676,GO:0003723,GO:0043484,GO:0009644	nucleic acid binding|RNA binding|regulation of RNA splicing|response to high light intensity
1018	TraesCS6B02G194000	146.119	58.8736	233.365	3.96383	1.9869	0.0230066	0.157296	Up	2.74949	1.56423	1.32626	8.15826	7.15261	4.11968	NSE4A		GO:0005634,GO:0006281,GO:0030915	nucleus|DNA repair|Smc5-Smc6 complex
1019	TraesCS1D02G075700	78.0077	31.4251	124.59	3.96468	1.9872	0.0146555	0.116614	Up	1.11182	1.50585	0.601005	4.07347	6.34404	4.10763	OSH71	KN1-type homeobox transcription factor [Source:UniProtKB/TrEMBL;Acc:B6F212]	GO:0043565,GO:0005634,GO:0003677,GO:0006355	sequence-specific DNA binding|nucleus|DNA binding|regulation of transcription, DNA-templated
1020	TraesCS5A02G236200	111.742	45.007	178.477	3.96553	1.98752	0.0229021	0.156771	Up	1.63023	0.766015	1.18668	4.56483	7.60243	2.78475			GO:0016021	integral component of membrane
1021	TraesCS5D02G218000	34.3426	13.831	54.8543	3.96605	1.9877	0.0409774	0.226389	Up	2.92014	0.425857	1.20969	7.22379	5.38681	4.76716			GO:0016021,GO:0061929	integral component of membrane|gamma-glutamylaminecyclotransferase activity
1022	TraesCS3D02G140900	284.643	114.626	454.661	3.96646	1.98785	0.0466382	0.245395	Up	3.75329	2.58746	4.31705	16.0259	26.5762	7.4747	GLCAT14A		GO:0016020,GO:0008375	membrane|acetylglucosaminyltransferase activity
1023	TraesCS5A02G269300	269.788	108.636	430.941	3.96683	1.98799	0.0197227	0.141932	Up	3.69865	2.98827	2.66078	13.4867	13.6529	7.67433	HMGR	3-hydroxy-3-methylglutaryl coenzyme A reductase [Source:UniProtKB/TrEMBL;Acc:A0A341V2A0]	GO:0016021,GO:0050662,GO:0055114,GO:0050661,GO:0016616,GO:0008299,GO:0004420,GO:0015936	integral component of membrane|coenzyme binding|oxidation-reduction process|NADP binding|oxidoreductase activity, acting on the CH-OH group of donors, NAD or NADP as acceptor|isoprenoid biosynthetic process|hydroxymethylglutaryl-CoA reductase (NADPH) activity|coenzyme A metabolic process	ko00900,ko04152	Terpenoid backbone biosynthesis|AMPK signaling pathway
1024	TraesCS2B02G291800	186.707	75.144	298.27	3.96932	1.98889	0.0411873	0.22711	Up	2.60042	1.91043	1.69551	9.78128	6.39064	4.72339	Os04g0321800		GO:0003824,GO:0004722,GO:0006470	catalytic activity|protein serine/threonine phosphatase activity|protein dephosphorylation
1025	TraesCS7D02G340200	1399.4	563.152	2235.65	3.96989	1.9891	0.0159144	0.123204	Up	12.6985	10.4728	11.4486	50.6431	49.8962	27.9154	PI4KG4		GO:0016301,GO:0005515	kinase activity|protein binding
1026	TraesCS1B02G182600	166.114	66.8309	265.398	3.97118	1.98957	0.0179804	0.133736	Up	1.5759	1.72887	2.06278	8.02761	7.97552	4.31287	RPS27AA		GO:0003676	nucleic acid binding	ko03010	Ribosome
1027	TraesCS7B02G325300	405.011	162.94	647.082	3.9713	1.98961	0.0291579	0.183069	Up	10.4103	6.81476	5.50047	31.8523	28.093	14.8181	LRR1		GO:0005515	protein binding
1028	TraesCS5B02G062000	311.161	125.167	497.155	3.97192	1.98984	0.0170578	0.129208	Up	1.5223	1.2346	1.49636	5.61143	5.72609	3.22568			GO:0005524,GO:0005622,GO:0006897,GO:0016301,GO:0046854,GO:0048015,GO:0016303,GO:0009651,GO:0072593,GO:0055046	ATP binding|intracellular|endocytosis|kinase activity|phosphatidylinositol phosphorylation|phosphatidylinositol-mediated signaling|1-phosphatidylinositol-3-kinase activity|response to salt stress|reactive oxygen species metabolic process|microgametogenesis	ko00562,ko04140,ko04070,ko04145	Inositol phosphate metabolism|Regulation of autophagy|Phosphatidylinositol signaling system|Phagosome
1029	TraesCS1A02G097200	352.304	141.686	562.922	3.97302	1.99024	0.0159743	0.123548	Up	7.79816	3.78646	4.93798	25.3728	21.706	16.1045	NIFU4		GO:0005506,GO:0051536,GO:0016226	iron ion binding|iron-sulfur cluster binding|iron-sulfur cluster assembly
1030	TraesCS7D02G243700	649.695	261.249	1038.14	3.97376	1.99051	0.0146986	0.116864	Up	28.0388	16.7704	20.8304	102.221	126.365	60.8202	SAP1		GO:0003677,GO:0008270	DNA binding|zinc ion binding
1031	TraesCS2A02G165900	49.0935	19.7368	78.4502	3.97482	1.99089	0.0294041	0.184052	Up	0.368805	0.481317	0.415567	1.93532	1.53663	1.04619	Os10g0391300
1032	TraesCS2A02G182600	1284.33	516.286	2052.37	3.97525	1.99105	0.0151851	0.119493	Up	6.55856	4.2108	5.38199	19.639	28.6326	14.7114	TIF5A	Eukaryotic translation initiation factor 5A [Source:UniProtKB/TrEMBL;Acc:A0A341Q8L9]	GO:0003723,GO:0003746,GO:0043022,GO:0045905,GO:0006452,GO:0045901	RNA binding|translation elongation factor activity|ribosome binding|positive regulation of translational termination|translational frameshifting|positive regulation of translational elongation
1033	TraesCS2D02G281100	71.8559	28.8836	114.828	3.97555	1.99116	0.0162268	0.124934	Up	1.45264	1.05122	1.55008	5.53276	6.93418	5.57414	At1g67340		GO:0005515	protein binding
1034	TraesCS4A02G050000	135.697	54.5397	216.854	3.97608	1.99135	0.0096483	0.088085	Up	1.21515	2.13072	2.60131	8.19381	13.3826	8.82366	Os03g0207400		GO:0046872,GO:0003824,GO:0004722,GO:0043169,GO:0006470	metal ion binding|catalytic activity|protein serine/threonine phosphatase activity|cation binding|protein dephosphorylation
1035	TraesCS1B02G073600	118.336	47.5518	189.12	3.97714	1.99173	0.0148788	0.117805	Up	1.56458	3.43884	2.26198	12.7029	8.2826	8.52134	SKIP1		GO:0005515	protein binding
1036	TraesCS5A02G164600	1053.77	423.419	1684.11	3.97742	1.99183	0.042183	0.230742	Up	33.2726	17.1714	15.5715	106.165	112.206	40.4847	PAP2
1037	TraesCS5A02G505400	246.397	98.9822	393.813	3.97862	1.99227	0.0162786	0.125165	Up	6.42176	4.18532	4.22534	18.3313	28.3056	13.6269
1038	TraesCS1B02G114100	42.4873	17.0665	67.9082	3.97904	1.99242	0.0288783	0.182016	Up	0	0.747448	0.595894	1.55583	1.9173	1.35856	CRK20		GO:0005524,GO:0004672,GO:0006468	ATP binding|protein kinase activity|protein phosphorylation
1039	TraesCS1B02G228600	47.3157	19.0001	75.6313	3.98057	1.99297	0.0177997	0.132918	Up	0.96442	0.777407	0.601807	1.21115	5.99768	3.50641	ATL47		GO:0016021	integral component of membrane
1040	TraesCS1D02G407300	243.742	97.8642	389.62	3.98123	1.99322	0.0164359	0.125963	Up	8.07757	5.3136	5.3374	27.7536	26.821	18.1581	At1g29970		GO:0016021	integral component of membrane
1041	TraesCS1A02G355500	271.597	109.025	434.169	3.9823	1.9936	0.0286468	0.181155	Up	2.7798	1.90954	2.64899	11.9352	10.3309	4.97354
1042	TraesCS1B02G240400	155.276	62.3204	248.232	3.98317	1.99392	0.0129166	0.107075	Up	1.58183	1.53995	2.49692	7.74961	7.8979	6.66864	NDT1		GO:0022857,GO:0055085,GO:0016021,GO:0005739,GO:0051724,GO:0031969	transmembrane transporter activity|transmembrane transport|integral component of membrane|mitochondrion|NAD transmembrane transporter activity|chloroplast membrane
1043	TraesCS2A02G117300	4126.28	1655.92	6596.64	3.98367	1.9941	0.0153138	0.120039	Up	50.9229	41.1938	30.2428	164.417	186.685	98.4359	XYLA	Xylose isomerase [Source:UniProtKB/TrEMBL;Acc:W5B0Q9]	GO:0005975,GO:0046872,GO:0005783,GO:0005794,GO:0005774,GO:0009045,GO:0042732	carbohydrate metabolic process|metal ion binding|endoplasmic reticulum|Golgi apparatus|vacuolar membrane|xylose isomerase activity|D-xylose metabolic process	ko00040,ko00051	Pentose and glucuronate interconversions|Fructose and mannose metabolism
1044	TraesCS7D02G513300	390.485	156.613	624.357	3.98663	1.99517	0.015627	0.121708	Up	7.61443	5.19566	5.14192	22.0175	27.216	14.0768	ERG1		GO:0005829,GO:0009409,GO:0009506	cytosol|response to cold|plasmodesma
1045	TraesCS1A02G110300	1654.48	663.416	2645.54	3.98775	1.99558	0.0148688	0.117752	Up	16.9641	18.5593	20.8885	71.4024	76.5476	43.4343	ACX4		GO:0055114,GO:0016627,GO:0050660,GO:0003995	oxidation-reduction process|oxidoreductase activity, acting on the CH-CH group of donors|flavin adenine dinucleotide binding|acyl-CoA dehydrogenase activity	ko04024,ko00592,ko00071,ko04146,ko01040,ko01212	cAMP signaling pathway|alpha-Linolenic acid metabolism|Fatty acid degradation|Peroxisome|Biosynthesis of unsaturated fatty acids|Fatty acid metabolism
1046	TraesCS5B02G227400	96.2991	38.604	153.994	3.98908	1.99606	0.00428512	0.0506345	Up	2.79137	3.00493	3.13484	7.29682	12.1571	21.2846
1047	TraesCS1B02G068400	68.6298	27.499	109.761	3.99144	1.99691	0.009395	0.0866814	Up	0.188062	0.270666	1.08558	2.18715	2.86237	5.12436
1048	TraesCS6A02G074200	84.4272	33.8258	135.029	3.99188	1.99707	0.0182205	0.134828	Up	1.46029	0.64634	0.469442	3.72353	3.83099	3.05246			GO:0016491	oxidoreductase activity
1049	TraesCS3D02G170300	34.1033	13.6606	54.546	3.99293	1.99745	0.0184942	0.136099	Up	0.961207	0.609195	0.529908	3.24927	2.49385	4.11425	At3g15140		GO:0003676	nucleic acid binding
1050	TraesCS7D02G001600	64.3294	25.7629	102.896	3.99396	1.99782	0.0262599	0.171979	Up	0.500044	0.279159	0.263051	1.80559	1.71063	1.0259	PUB12	RING-type E3 ubiquitin transferase [Source:UniProtKB/TrEMBL;Acc:A0A1D6CWE9]	GO:0004842,GO:0016567,GO:0005515,GO:0070696	ubiquitin-protein transferase activity|protein ubiquitination|protein binding|transmembrane receptor protein serine/threonine kinase binding
1051	TraesCS3B02G042000	591.983	237.072	946.895	3.99412	1.99788	0.0134061	0.109936	Up	20.5766	13.2089	14.5463	75.4197	114.726	50.5174
1052	TraesCS2A02G111200	69.4407	27.8027	111.079	3.99525	1.99829	0.0333546	0.198865	Up	0.530155	0.215649	1.00194	3.52516	3.13963	1.62862	SKIP6		GO:0005515	protein binding
1053	TraesCS5A02G137700	130.421	52.2148	208.627	3.99555	1.99839	0.00595276	0.0636457	Up	1.33954	1.07118	1.32437	3.04429	3.51527	5.72618	HMGCL		GO:0003824	catalytic activity	ko00280,ko00072,ko00281,ko00650,ko04146	Valine, leucine and isoleucine degradation|Synthesis and degradation of ketone bodies|Geraniol degradation|Butanoate metabolism|Peroxisome
1054	TraesCS5A02G359900	217.564	87.0905	348.037	3.99627	1.99865	0.0149269	0.118081	Up	1.63368	1.53111	1.08834	6.62917	5.44818	4.69918	Os09g0558000		GO:0046872,GO:0003824,GO:0004722,GO:0043169,GO:0006470	metal ion binding|catalytic activity|protein serine/threonine phosphatase activity|cation binding|protein dephosphorylation
1055	TraesCS4D02G214100	1860.75	744.795	2976.71	3.99668	1.9988	0.0152278	0.119689	Up	19.2768	15.8957	13.4155	80.0258	74.0187	42.6853	SR45A		GO:0003676	nucleic acid binding
1056	TraesCS2A02G164600	202.714	81.1359	324.291	3.99689	1.99888	0.0147326	0.117029	Up	4.29332	3.97769	4.8377	15.3573	21.7848	11.837	GEM
1057	TraesCS7B02G282500	490.035	196.131	783.94	3.99703	1.99893	0.0153827	0.12039	Up	8.31698	7.59527	8.71594	35.0443	36.8076	20.0687	VPS32.1		GO:0007034	vacuolar transport	ko04144	Endocytosis
1058	TraesCS1A02G223700	264.827	105.978	423.676	3.99776	1.99919	0.044278	0.237594	Up	1.29585	0.87144	1.10413	4.91799	4.19145	2.11002
1059	TraesCS5D02G071800	37.9383	15.178	60.6985	3.9991	1.99968	0.0439225	0.236367	Up	1.6363	0.847147	1.10608	6.55909	6.07894	2.4968	WRKY11		GO:0003700,GO:0043565,GO:0005634,GO:0006355	DNA-binding transcription factor activity|sequence-specific DNA binding|nucleus|regulation of transcription, DNA-templated
1060	TraesCS7B02G305900	68.6852	27.4704	109.9	4.00068	2.00024	0.0202719	0.144598	Up	2.05962	1.84916	1.38388	10.6534	10.8991	6.22944			GO:0016787	hydrolase activity
1061	TraesCS1A02G255400	438.799	175.493	702.106	4.00077	2.00028	0.0206825	0.146367	Up	4.8921	3.59606	2.74109	18.5985	14.1748	9.10783
1062	TraesCS6B02G175200	133.112	53.2276	212.997	4.00164	2.00059	0.0152179	0.119649	Up	1.72454	1.63822	1.18604	6.04512	7.43214	5.04124	Os12g0192500		GO:0003824,GO:0009228,GO:0004789,GO:0008972	catalytic activity|thiamine biosynthetic process|thiamine-phosphate diphosphorylase activity|phosphomethylpyrimidine kinase activity	ko00730	Thiamine metabolism
1063	TraesCS7B02G089800	45.1452	18.0436	72.2469	4.00403	2.00145	0.037926	0.215797	Up	0.343903	0.66471	0.145781	0.36266	1.90841	0.656632	AKR1
1064	TraesCS3A02G416800	6035.36	2412.13	9658.59	4.00418	2.00151	0.0075786	0.0748401	Up	229.087	109.164	186.396	659.285	622.489	655.208
1065	TraesCS1B02G126500	809.331	323.441	1295.22	4.0045	2.00162	0.0134018	0.109914	Up	1.87955	10.8809	11.4482	37.7149	33.2513	20.4405	Os05g0155601	Importin subunit alpha [Source:UniProtKB/TrEMBL;Acc:W5AA91]	GO:0005737,GO:0005634,GO:0006606,GO:0061608,GO:0015031,GO:0005515	cytoplasm|nucleus|protein import into nucleus|nuclear import signal receptor activity|protein transport|protein binding
1066	TraesCS5B02G357300	88.743	35.4607	142.025	4.00514	2.00185	0.0287638	0.181551	Up	2.98877	2.30809	1.38478	9.35408	11.6905	4.36678
1067	TraesCS3B02G111000	85.8999	34.3161	137.484	4.00639	2.0023	0.0232104	0.158222	Up	1.15215	0.943469	0.821935	4.59384	5.11236	2.51777	HRD1A		GO:0016021	integral component of membrane
1068	TraesCS3A02G233300	298.132	119.089	477.175	4.00687	2.00248	0.0290388	0.182673	Up	3.21492	2.0531	2.62811	13.5374	9.3523	6.60769	AATP1	ADP,ATP carrier protein [Source:UniProtKB/TrEMBL;Acc:A0A341S018]	GO:0016021,GO:0005471,GO:0006862	integral component of membrane|ATP:ADP antiporter activity|nucleotide transport
1069	TraesCS1D02G243500	16.6328	6.64061	26.625	4.00942	2.00339	0.036787	0.211677	Up	0.10301	0.0488239	0.458885	0.580365	1.58833	1.06261	At1g06800		GO:0016787,GO:0006629	hydrolase activity|lipid metabolic process
1070	TraesCS2D02G174800	57.9459	23.1343	92.7574	4.00952	2.00343	0.0346196	0.203581	Up	2.40183	1.48761	0.548681	7.94989	10.1945	3.1198	ATL3		GO:0016021,GO:0016020	integral component of membrane|membrane
1071	TraesCS7A02G152900	137.244	54.7853	219.703	4.01026	2.0037	0.0290757	0.182782	Up	0.691834	1.28726	1.32673	5.63043	5.47607	2.40698	CNGC17		GO:0016021,GO:0016020,GO:0055085,GO:0005216,GO:0006811,GO:0005515	integral component of membrane|membrane|transmembrane transport|ion channel activity|ion transport|protein binding
1072	TraesCS2A02G343100	242.338	96.7083	387.968	4.01173	2.00422	0.0149214	0.118049	Up	1.5743	1.71723	2.09784	7.76575	8.16231	4.80333	SERK2	Somatic embryogenesis receptor kinase 1 [Source:UniProtKB/TrEMBL;Acc:G4XGX1]	GO:0016021,GO:0005524,GO:0004672,GO:0004674,GO:0007165,GO:0005102,GO:0009742,GO:1900150,GO:0045089,GO:0040008,GO:0010262,GO:0006468,GO:0016020,GO:0000166,GO:0016301,GO:0016310,GO:0016740,GO:0004675,GO:0007178	integral component of membrane|ATP binding|protein kinase activity|protein serine/threonine kinase activity|signal transduction|signaling receptor binding|brassinosteroid mediated signaling pathway|regulation of defense response to fungus|positive regulation of innate immune response|regulation of growth|somatic embryogenesis|protein phosphorylation|membrane|nucleotide binding|kinase activity|pho…
1073	TraesCS5D02G400500	188.943	75.3925	302.494	4.01225	2.00441	0.0141933	0.114218	Up	9.59439	7.7154	6.73865	39.7246	30.5323	25.1132	SPAC1782.12c		GO:0016021,GO:0016020	integral component of membrane|membrane
1074	TraesCS3B02G146400	121.353	48.4009	194.306	4.01452	2.00523	0.021263	0.148923	Up	1.64094	1.08623	0.902738	5.16896	4.22452	2.8758	OFUT1
1075	TraesCS5B02G307600	209.18	83.3742	334.987	4.01787	2.00643	0.00415816	0.0495612	Up	1.91037	2.65809	3.11136	9.21763	11.9756	16.0058	SCPL6		GO:0004185,GO:0006508	serine-type carboxypeptidase activity|proteolysis
1076	TraesCS1D02G150300	556.16	221.488	890.832	4.02204	2.00793	0.0300496	0.186436	Up	5.01873	5.22619	5.80322	26.0023	21.8616	11.0952
1077	TraesCS5B02G119100	38.8075	15.4518	62.1631	4.02302	2.00828	0.0229655	0.15711	Up	1.99394	1.43978	1.30564	5.98099	9.36222	6.38115			GO:0016021	integral component of membrane
1078	TraesCS6A02G177100	83.5744	33.2648	133.884	4.02479	2.00891	0.0226933	0.155727	Up	1.45668	1.00595	1.12237	5.92559	4.20898	3.31708
1079	TraesCS3B02G548700	97.1675	38.669	155.666	4.02561	2.00921	0.0203211	0.144769	Up	1.68689	1.22855	1.05877	4.91293	3.67267	3.0378
1080	TraesCS3D02G439100	176.208	70.1179	282.299	4.02606	2.00937	0.0153891	0.12039	Up	6.29386	4.69049	5.02992	23.4395	29.7044	14.9818
1081	TraesCS4A02G010800	617.634	245.724	989.545	4.02706	2.00973	0.012831	0.106729	Up	5.3913	4.00752	4.72355	20.172	21.847	13.7935	PAA2		GO:0016021,GO:0000166,GO:0019829,GO:0006812,GO:0046872,GO:0030001	integral component of membrane|nucleotide binding|ATPase-coupled cation transmembrane transporter activity|cation transport|metal ion binding|metal ion transport
1082	TraesCS3D02G180000	16.4334	6.53783	26.329	4.02718	2.00977	0.0475095	0.248184	Up	0.745058	0.233394	0.238987	3.77984	3.2575	2.18746			GO:0016021	integral component of membrane
1083	TraesCS1B02G373400	40.1341	15.959	64.3093	4.02967	2.01066	0.0318528	0.193152	Up	0.634871	0.481655	0.345629	1.18342	0.98887	3.68515	MAP65-9		GO:0008017,GO:0000226	microtubule binding|microtubule cytoskeleton organization
1084	TraesCS7D02G299700	209.12	83.1361	335.104	4.03079	2.01106	0.0150442	0.118716	Up	6.08266	4.77721	4.9117	26.7895	24.223	16.7929	At1g01500		GO:0016021	integral component of membrane
1085	TraesCS1B02G155300	40.5622	16.1172	65.0072	4.0334	2.012	0.0283815	0.180146	Up	0.819173	0.392924	0.386568	2.49579	3.33699	1.73627	GLCAT14A		GO:0016021,GO:0016020,GO:0008375,GO:0009567,GO:0048868	integral component of membrane|membrane|acetylglucosaminyltransferase activity|double fertilization forming a zygote and endosperm|pollen tube development
1086	TraesCS5D02G406600	12.0898	4.80362	19.3759	4.03361	2.01207	0.0483322	0.25064	Up	0.0555093	0.0367053	0.0552669	0.354579	0.302969	0.550507
1087	TraesCS7A02G435300	39.8102	15.8172	63.8032	4.03378	2.01213	0.0438027	0.236013	Up	0.267044	0.240633	0.270959	1.02951	1.12983	0.39611	PSY1R		GO:0005524,GO:0004672,GO:0006468,GO:0005515	ATP binding|protein kinase activity|protein phosphorylation|protein binding
1088	TraesCS6D02G262500	139.786	55.5345	224.038	4.0342	2.01228	0.0216046	0.150578	Up	2.33014	1.40741	1.58359	7.06487	6.84636	4.441	MKRN		GO:0046872	metal ion binding
1089	TraesCS5B02G507200	279.183	110.873	447.493	4.03608	2.01295	0.0144315	0.115439	Up	7.38193	5.29781	4.14349	28.7062	26.0079	16.8263			GO:0003824	catalytic activity
1090	TraesCS6D02G306200	293.073	116.37	469.776	4.03693	2.01326	0.0142306	0.114369	Up	3.90882	3.23489	3.08028	15.3868	15.7603	9.80232
1091	TraesCS4A02G215000	367.063	145.687	588.439	4.03906	2.01402	0.0208147	0.146866	Up	4.8814	4.63867	5.55886	20.3435	20.5522	10.1248	At1g71900	Probable magnesium transporter [Source:UniProtKB/TrEMBL;Acc:W5DTX2]	GO:0016021,GO:0005886,GO:0015095,GO:0005769,GO:0015693	integral component of membrane|plasma membrane|magnesium ion transmembrane transporter activity|early endosome|magnesium ion transport
1092	TraesCS5A02G102600	26.3509	10.4569	42.245	4.03994	2.01433	0.0382572	0.217013	Up	0.247455	0.398334	0.572562	2.01354	2.01275	1.19566	PLT5		GO:0016021,GO:0022857,GO:0016020,GO:0055085,GO:0005215	integral component of membrane|transmembrane transporter activity|membrane|transmembrane transport|transporter activity
1093	TraesCS6B02G366800	372.04	147.608	596.471	4.0409	2.01468	0.0494695	0.254099	Up	2.51125	1.80368	1.91323	8.65057	8.45055	3.59811	SCD1
1094	TraesCS7B02G150700	362.313	143.725	580.902	4.04176	2.01498	0.0132461	0.109062	Up	7.95191	4.58297	3.34184	26.0774	25.9947	17.275
1095	TraesCS4D02G180700	65.0753	25.8133	104.337	4.042	2.01507	0.0167066	0.12749	Up	0.486578	0.861549	1.08868	4.04922	3.8135	3.18322	ABCI20		GO:0005524,GO:0016887	ATP binding|ATPase activity	ko03018	RNA degradation
1096	TraesCS7B02G422700	17.3148	6.86658	27.763	4.0432	2.0155	0.0410211	0.226561	Up	0.789461	0.23901	0.138565	1.46866	0.576647	1.81675
1097	TraesCS7D02G179700	266.134	105.534	426.734	4.04356	2.01563	0.0125893	0.105452	Up	1.79683	2.1955	1.9054	10.1276	8.04518	7.48873	PABN3		GO:0003676,GO:0003723	nucleic acid binding|RNA binding	ko03015	mRNA surveillance pathway
1098	TraesCS5B02G121400	823.448	326.492	1320.4	4.04421	2.01586	0.00932045	0.0862418	Up	4.51851	5.24097	5.80152	14.2714	27.9395	16.3166	At5g09300		GO:0016624	oxidoreductase activity, acting on the aldehyde or oxo group of donors, disulfide as acceptor	ko00640,ko00280	Propanoate metabolism|Valine, leucine and isoleucine degradation
1099	TraesCS5B02G264300	41.4599	16.4368	66.483	4.04476	2.01606	0.0145588	0.116167	Up	0.789115	0.492837	0.566588	2.94706	1.90337	3.33821	BHLH130		GO:0046983	protein dimerization activity
1100	TraesCS1B02G127900	126.086	49.9776	202.195	4.04571	2.01639	0.0118592	0.101318	Up	0	1.29256	2.10316	3.12437	6.60693	3.24676	Os02g0794700		GO:0005737,GO:0030145,GO:0005622,GO:0004177,GO:0019538,GO:0008235,GO:0006508	cytoplasm|manganese ion binding|intracellular|aminopeptidase activity|protein metabolic process|metalloexopeptidase activity|proteolysis	ko00480	Glutathione metabolism
1101	TraesCS3B02G313900	78.8687	31.2489	126.488	4.04777	2.01713	0.008738	0.0825012	Up	1.44345	0.543064	1.14638	2.25443	6.10883	4.91636	RhGT1	Glycosyltransferase [Source:UniProtKB/TrEMBL;Acc:A0A1D5VTL6]	GO:0016758	transferase activity, transferring hexosyl groups
1102	TraesCS7B02G102000	141.761	56.1677	227.354	4.04778	2.01713	0.0237516	0.160636	Up	2.08486	1.04962	1.5991	5.39979	9.56738	3.10614	PCS1		GO:0046872,GO:0010038,GO:0016756,GO:0046938	metal ion binding|response to metal ion|glutathione gamma-glutamylcysteinyltransferase activity|phytochelatin biosynthetic process
1103	TraesCS5B02G461000	19.8915	7.8803	31.9027	4.04841	2.01736	0.0355899	0.207168	Up	0.603423	0.308188	0.198054	1.19108	2.25506	1.8277	PHT1		GO:0016747	transferase activity, transferring acyl groups other than amino-acyl groups	ko00940,ko00945,ko00941	Phenylpropanoid biosynthesis|Stilbenoid, diarylheptanoid and gingerol biosynthesis|Flavonoid biosynthesis
1104	TraesCS5D02G166400	531.052	210.379	851.726	4.04853	2.0174	0.010706	0.0946313	Up	4.8265	4.34007	5.02092	22.8754	25.32	16.3411	LECRKS2		GO:0005524,GO:0004672,GO:0004674,GO:0006468	ATP binding|protein kinase activity|protein serine/threonine kinase activity|protein phosphorylation
1105	TraesCS6B02G080000	516.635	204.665	828.604	4.04859	2.01742	0.00697074	0.070923	Up	10.426	5.54543	8.72573	32.9364	30.9669	34.1982	gto2		GO:0004364,GO:0005515	glutathione transferase activity|protein binding
1106	TraesCS5B02G438800	36.6172	14.4939	58.7404	4.05275	2.0189	0.0251339	0.166968	Up	0.796236	0.228129	0.120789	1.62213	1.08165	1.61043	At2g32040		GO:0016021	integral component of membrane
1107	TraesCS1A02G248800	47.2657	18.7029	75.8284	4.05436	2.01948	0.0377558	0.215168	Up	0.365901	0.167034	0.340989	1.09956	1.41835	0.489839	WEL2
1108	TraesCS7B02G316600	114.888	45.4598	184.317	4.05449	2.01952	0.0419037	0.229669	Up	1.01667	0.450154	0.239164	2.28584	2.6569	0.976522	ARF19	Auxin response factor [Source:UniProtKB/TrEMBL;Acc:A0A341YH66]	GO:0005634,GO:0003677,GO:0006355,GO:0009725,GO:0005515	nucleus|DNA binding|regulation of transcription, DNA-templated|response to hormone|protein binding
1109	TraesCS5B02G309300	42.96	16.9957	68.9242	4.0554	2.01984	0.046395	0.244697	Up	0.0603942	0.198947	1.28574	3.77558	1.36568	2.26589	Os04g0560400		GO:0005975,GO:0004560	carbohydrate metabolic process|alpha-L-fucosidase activity	ko00511	Other glycan degradation
1110	TraesCSU02G076400	45.2081	17.8842	72.5319	4.05563	2.01993	0.00771399	0.0757542	Up	0.527926	0.870057	0.760296	2.04966	6.06914	6.21991	SYP121		GO:0016021,GO:0006886,GO:0016020,GO:0005622,GO:0016192,GO:0005484	integral component of membrane|intracellular protein transport|membrane|intracellular|vesicle-mediated transport|SNAP receptor activity	ko04130	SNARE interactions in vesicular transport
1111	TraesCS6A02G068000	197.499	78.1294	316.868	4.05569	2.01995	0.0157278	0.122256	Up	5.46756	3.41188	1.79955	15.8185	11.3865	9.82657	HVA22I	HVA22-like protein [Source:UniProtKB/TrEMBL;Acc:A0A096UU17]	GO:0016020	membrane
1112	TraesCS2D02G176800	929.773	367.587	1491.96	4.05879	2.02105	0.00789351	0.0768756	Up	13.6018	14.2921	14.9406	52.3869	71.8514	52.8896	TIFY10B				ko04075	Plant hormone signal transduction
1113	TraesCS5D02G375700	369.548	146.101	592.995	4.05879	2.02105	0.0138158	0.112377	Up	3.20328	3.15399	2.51342	12.9185	13.363	8.13129	HAK18	Potassium transporter [Source:UniProtKB/TrEMBL;Acc:W5FXB9]	GO:0016021,GO:0016020,GO:0015079,GO:0071805	integral component of membrane|membrane|potassium ion transmembrane transporter activity|potassium ion transmembrane transport
1114	TraesCS2A02G424900	477.082	188.612	765.552	4.05887	2.02108	0.0151859	0.119493	Up	6.23799	5.37225	5.66156	26.6548	23.5424	14.2094	sdo1		GO:0042254,GO:0042256	ribosome biogenesis|mature ribosome assembly	ko03008	Ribosome biogenesis in eukaryotes
1115	TraesCS4D02G223000	103.104	40.7582	165.45	4.05929	2.02123	0.00859919	0.0815752	Up	0.430846	0.922387	1.59323	3.68632	4.72045	4.48559	At5g44410		GO:0016491,GO:0071949,GO:0055114,GO:0050660	oxidoreductase activity|FAD binding|oxidation-reduction process|flavin adenine dinucleotide binding
1116	TraesCS6D02G301700	20.0087	7.90906	32.1083	4.05968	2.02137	0.0398978	0.22283	Up	0.192472	0.106655	0.0489979	0.371218	0.407295	0.532799	EDR1		GO:0005524,GO:0004672,GO:0006468	ATP binding|protein kinase activity|protein phosphorylation
1117	TraesCS6A02G405400	231.234	91.4014	371.066	4.05975	2.02139	0.0199851	0.14319	Up	1.51536	1.31893	1.38594	7.2597	6.82788	3.04522	XBAT35
1118	TraesCS5A02G526300	240.585	95.0445	386.125	4.06257	2.02239	0.013099	0.108107	Up	3.63785	2.84371	3.38987	15.2925	16.0223	9.95797
1119	TraesCS3D02G084900	468.218	184.946	751.489	4.06329	2.02265	0.00876055	0.0826459	Up	9.66631	4.83987	2.96496	12.555	42.9871	22.0656	CYP704C1		GO:0016021,GO:0020037,GO:0005506,GO:0016705,GO:0055114	integral component of membrane|heme binding|iron ion binding|oxidoreductase activity, acting on paired donors, with incorporation or reduction of molecular oxygen|oxidation-reduction process
1120	TraesCS6A02G245200	88.2527	34.8494	141.656	4.0648	2.02318	0.0110132	0.0966121	Up	9.93571	6.6603	6.74694	31.4684	29.2687	36.0223	VP15	Molybdopterin synthase sulfur carrier subunit [Source:UniProtKB/TrEMBL;Acc:A0A341WLK6]	GO:0006777,GO:0005829	Mo-molybdopterin cofactor biosynthetic process|cytosol	ko04122,ko00790	Sulfur relay system|Folate biosynthesis
1121	TraesCS7D02G318600	48.7076	19.2291	78.1861	4.06602	2.02362	0.0279891	0.178689	Up	0.326042	0.250493	0.590377	2.21622	1.69606	1.07198	CCR4		GO:0016021,GO:0005524,GO:0004672,GO:0006468	integral component of membrane|ATP binding|protein kinase activity|protein phosphorylation
1122	TraesCS5D02G392600	785.728	310.186	1261.27	4.06617	2.02367	0.0249469	0.166118	Up	18.3465	12.2036	13.856	73.467	68.2382	31.8709	TSJT1
1123	TraesCS1D02G380000	54.0591	21.3358	86.7823	4.06744	2.02412	0.0183886	0.135657	Up	1.31116	0.578759	0.62841	2.7474	5.80702	2.91261	HIP1
1124	TraesCS2D02G371100	33.9568	13.3986	54.5151	4.06873	2.02458	0.023399	0.159111	Up	0.866415	0.815575	0.613784	2.53889	5.07344	3.90305	MIA40		GO:0015035,GO:0045041,GO:0005739,GO:0005777,GO:0006625	protein disulfide oxidoreductase activity|protein import into mitochondrial intermembrane space|mitochondrion|peroxisome|protein targeting to peroxisome
1125	TraesCS2B02G145600	183.745	72.4988	294.992	4.06892	2.02465	0.0128705	0.106909	Up	2.89802	1.67174	1.67792	9.67331	12.3281	7.08992
1126	TraesCS7A02G490300	110.178	43.4585	176.897	4.07048	2.0252	0.00973375	0.0884819	Up	7.25106	4.26382	3.42876	21.4742	21.2695	22.3766	dph3
1127	TraesCS4B02G385500	55.368	21.833	88.9029	4.07194	2.02572	0.00565012	0.06141	Up	4.68939	1.54882	0.78269	3.76538	10.1597	16.7642	DIR20	Dirigent protein [Source:UniProtKB/TrEMBL;Acc:A0A1D5XI78]	GO:0048046	apoplast
1128	TraesCS5B02G156800	395.967	156.135	635.798	4.0721	2.02577	0.0319305	0.193474	Up	2.83081	2.67729	3.19582	14.5693	11.5119	6.44931	CXIP4		GO:0003676,GO:0008270	nucleic acid binding|zinc ion binding
1129	TraesCS4B02G118800	82.4562	32.5097	132.403	4.07271	2.02599	0.0161015	0.124257	Up	2.74317	1.45567	2.44268	11.1612	12.6089	8.07562
1130	TraesCS1B02G281600	66.1801	26.0869	106.273	4.07382	2.02638	0.0164346	0.125963	Up	1.66463	0.866206	2.02025	6.28937	8.68112	5.5503			GO:0016021	integral component of membrane
1131	TraesCS3B02G275100	145.391	57.3002	233.482	4.07471	2.0267	0.00898673	0.0840963	Up	9.27546	5.42259	5.43595	30.5392	30.7373	30.4433	SAP2		GO:0003677,GO:0008270,GO:0046872	DNA binding|zinc ion binding|metal ion binding
1132	TraesCS7A02G208600	60.127	23.6864	96.5675	4.07691	2.02748	0.0208312	0.146927	Up	0.191237	0.169145	1.05292	1.89205	2.43542	1.49471	APCB1		GO:0004190,GO:0006508	aspartic-type endopeptidase activity|proteolysis
1133	TraesCS6B02G275300	58.1703	22.9133	93.4273	4.07743	2.02766	0.0132481	0.109066	Up	1.99013	1.92381	2.26747	8.1983	8.84641	9.87392
1134	TraesCS1B02G095800	193.755	76.2881	311.222	4.07956	2.02841	0.0478639	0.249237	Up	0	4.40204	4.61191	5.5783	28.7598	12.9707	PER2	Peroxidase [Source:UniProtKB/TrEMBL;Acc:W5A8K7]	GO:0046872,GO:0004601,GO:0020037,GO:0006979,GO:0005576,GO:0042744,GO:0055114	metal ion binding|peroxidase activity|heme binding|response to oxidative stress|extracellular region|hydrogen peroxide catabolic process|oxidation-reduction process
1135	TraesCS1B02G279100	241.87	95.2279	388.512	4.07982	2.0285	0.0187735	0.137512	Up	2.84861	2.14238	6.66285	13.4512	8.48059	34.317	IRL
1136	TraesCS6A02G350400	34.9191	13.7464	56.0919	4.08048	2.02874	0.0321767	0.194426	Up	0.524243	0.250109	0.62443	1.82552	3.41607	1.31649	DTX19	Protein DETOXIFICATION [Source:UniProtKB/TrEMBL;Acc:W5GAI6]	GO:0016021,GO:0016020,GO:0055085,GO:0015238,GO:0015297,GO:0006855,GO:0042910,GO:0042908	integral component of membrane|membrane|transmembrane transport|GO_0015238|antiporter activity|drug transmembrane transport|xenobiotic transmembrane transporter activity|xenobiotic transport
1137	TraesCS1D02G271800	40.5772	15.9614	65.1931	4.08443	2.03014	0.0374995	0.214205	Up	0.68982	0.445522	0.620731	3.75656	2.50963	1.54987			GO:0016021	integral component of membrane
1138	TraesCS1D02G371800	83.9356	33.013	134.858	4.085	2.03034	0.0100128	0.0903116	Up	1.54935	1.22492	2.13731	5.47948	8.39182	6.53882	MYB2		GO:0003677	DNA binding
1139	TraesCS2A02G502400	7406.87	2913.08	11900.7	4.08524	2.03042	0.0100203	0.0903239	Up	26.9699	25.7402	39.9499	126.051	141.676	93.7144	ha1	Plasma membrane ATPase [Source:UniProtKB/Swiss-Prot;Acc:P83970]	GO:0016021,GO:0000166,GO:0008553,GO:0120029,GO:0046872,GO:0005524,GO:0005886,GO:0016020,GO:0006811	integral component of membrane|nucleotide binding|proton-exporting ATPase activity, phosphorylative mechanism|proton export across plasma membrane|metal ion binding|ATP binding|plasma membrane|membrane|ion transport	ko00190	Oxidative phosphorylation
1140	TraesCS3D02G124300	704.454	277.013	1131.9	4.08607	2.03071	0.00733449	0.0732197	Up	9.18149	8.17198	11.4288	30.9159	44.6167	37.1588	ISS1		GO:0030170,GO:0003824,GO:0009058,GO:0006570,GO:0005829,GO:0006555,GO:1901997,GO:0009698,GO:0006569,GO:0006558,GO:0010326,GO:0009851,GO:0010366,GO:0009641,GO:0010252	pyridoxal phosphate binding|catalytic activity|biosynthetic process|tyrosine metabolic process|cytosol|methionine metabolic process|negative regulation of indoleacetic acid biosynthetic process via tryptophan|phenylpropanoid metabolic process|tryptophan catabolic process|L-phenylalanine metabolic process|methionine-oxo-acid transaminase activity|auxin biosynthetic process|negative regulation of e…
1141	TraesCS6D02G235600	55.7896	21.9375	89.6416	4.08623	2.03077	0.0224994	0.155008	Up	1.25621	0.725248	1.08427	4.59726	6.06815	3.20583
1142	TraesCS6A02G366100	32.9185	12.9403	52.8966	4.08774	2.0313	0.0176966	0.132399	Up	1.0297	2.11493	0.581637	4.29835	5.52123	5.61472
1143	TraesCS2B02G190400	277.51	109.068	445.953	4.08876	2.03166	0.0114276	0.0988426	Up	4.76406	4.0517	4.39073	16.4285	24.3417	13.6587	GEM
1144	TraesCS4A02G439000	214.308	84.2092	344.407	4.0899	2.03206	0.0149822	0.118401	Up	2.35531	2.12294	1.42478	7.59136	11.9385	4.81755	OPT7		GO:0016021,GO:0055085	integral component of membrane|transmembrane transport
1145	TraesCS5D02G181400	47.811	18.783	76.839	4.09089	2.03241	0.0233411	0.158852	Up	1.01659	1.8016	1.49502	4.95861	7.97952	3.55284	UBC28
1146	TraesCS4A02G249600	35.7089	14.0284	57.3894	4.09094	2.03243	0.0275996	0.177049	Up	0.52663	0.138625	0.518591	1.85313	1.96879	1.35229	FOLT1
1147	TraesCS5D02G403100	254.656	100.018	409.295	4.09222	2.03288	0.0185978	0.136573	Up	5.81964	5.26289	6.18315	29.3116	27.9542	13.3099			GO:0016021	integral component of membrane
1148	TraesCS3A02G102800	26.8781	10.5493	43.2068	4.09568	2.0341	0.010477	0.0931761	Up	0.466203	0.314759	0.61477	0.640904	3.10238	3.61744	HEX6		GO:0016021,GO:0022857,GO:0016020,GO:0055085,GO:0005215	integral component of membrane|transmembrane transporter activity|membrane|transmembrane transport|transporter activity
1149	TraesCS5B02G317000	479.237	188.052	770.423	4.09686	2.03452	0.00897183	0.0839863	Up	7.74348	6.77478	10.2925	34.1987	39.1139	29.7592	OsI_031067		GO:0005975,GO:0006098,GO:0017057	carbohydrate metabolic process|pentose-phosphate shunt|6-phosphogluconolactonase activity	ko01200,ko00030	Carbon metabolism|Pentose phosphate pathway
1150	TraesCS1A02G084900	44.3445	17.3952	71.2938	4.09848	2.03509	0.0216968	0.15099	Up	3.65067	0.552473	0.260599	5.8227	6.07014	5.77959
1151	TraesCS5A02G115100	394.707	154.803	634.611	4.09948	2.03544	0.0123673	0.104176	Up	6.71195	4.73404	6.05486	31.497	32.1859	18.6746	AAP3		GO:0016021	integral component of membrane
1152	TraesCS4A02G072400	454.461	178.213	730.71	4.1002	2.03569	0.0310799	0.190365	Up	3.93155	3.18995	2.76056	15.8448	13.2354	7.127
1153	TraesCS4A02G002800	39.1107	15.3364	62.8849	4.10035	2.03575	0.0320857	0.194048	Up	0.248522	0.679314	0.48616	3.08366	2.64009	1.8836	UROS		GO:0009507,GO:0033014,GO:0004852,GO:0006780	chloroplast|tetrapyrrole biosynthetic process|uroporphyrinogen-III synthase activity|uroporphyrinogen III biosynthetic process	ko00860	Porphyrin and chlorophyll metabolism
1154	TraesCS4A02G275300	1229.73	482.16	1977.29	4.1009	2.03594	0.0121448	0.102979	Up	30.4566	21.7333	11.8064	91.5093	131.75	58.9796	SDT1		GO:0016787	hydrolase activity
1155	TraesCS3A02G525200	469.011	183.844	754.177	4.10226	2.03642	0.0496679	0.254725	Up	7.40061	4.86377	4.74119	33.1633	25.161	12.299	PILS2		GO:0016021,GO:0055085,GO:0009733,GO:0005789,GO:0040009,GO:0010329,GO:0010311,GO:0010252	integral component of membrane|transmembrane transport|response to auxin|endoplasmic reticulum membrane|regulation of growth rate|auxin efflux transmembrane transporter activity|lateral root formation|auxin homeostasis
1156	TraesCS2B02G530500	7076.81	2773.61	11380	4.10296	2.03667	0.0100553	0.0905828	Up	33.7303	27.323	45.3249	135.828	167.133	103.046	ha1	Plasma membrane ATPase [Source:UniProtKB/TrEMBL;Acc:A0A1D5UMU8]	GO:0016021,GO:0046872,GO:0005524,GO:0005886,GO:0000166,GO:0008553,GO:0120029,GO:0016020,GO:0006811	integral component of membrane|metal ion binding|ATP binding|plasma membrane|nucleotide binding|proton-exporting ATPase activity, phosphorylative mechanism|proton export across plasma membrane|membrane|ion transport	ko00190	Oxidative phosphorylation
1157	TraesCS2B02G542400	70.0711	27.4378	112.704	4.10763	2.03831	0.0106764	0.0944566	Up	0.812724	0.743575	0.842227	2.45207	6.16736	3.75453	AP2	TaAP2-B [Source:UniProtKB/TrEMBL;Acc:M5AAW8]	GO:0003700,GO:0006351,GO:0005634,GO:0003677,GO:0006355,GO:0044212,GO:0009409,GO:0009909,GO:0060860,GO:0080050,GO:0097548,GO:0005667	DNA-binding transcription factor activity|transcription, DNA-templated|nucleus|DNA binding|regulation of transcription, DNA-templated|transcription regulatory region DNA binding|response to cold|regulation of flower development|regulation of floral organ abscission|regulation of seed development|seed abscission|transcription factor complex
1158	TraesCS5D02G065700	266.935	104.502	429.368	4.10873	2.03869	0.0156816	0.122039	Up	2.1867	1.59346	1.78418	7.34013	7.81424	4.01079			GO:0005524,GO:0005622,GO:0006897,GO:0016301,GO:0046854,GO:0048015,GO:0016303,GO:0009651,GO:0072593,GO:0055046	ATP binding|intracellular|endocytosis|kinase activity|phosphatidylinositol phosphorylation|phosphatidylinositol-mediated signaling|1-phosphatidylinositol-3-kinase activity|response to salt stress|reactive oxygen species metabolic process|microgametogenesis	ko00562,ko04140,ko04070,ko04145	Inositol phosphate metabolism|Regulation of autophagy|Phosphatidylinositol signaling system|Phagosome
1159	TraesCS3A02G530800	10164.4	3978.13	16350.6	4.11012	2.03918	0.00475511	0.0545544	Up	402.487	405.276	478.814	1504.77	1949.86	2052.34	MT2C		GO:0046872,GO:0005829,GO:0072593	metal ion binding|cytosol|reactive oxygen species metabolic process
1160	TraesCS4B02G302700	196.375	76.8551	315.895	4.11027	2.03923	0.0143782	0.115147	Up	2.82467	2.44019	4.1444	15.5967	12.5764	8.2994	VPS37-2		GO:0015031,GO:0032509,GO:0000813	protein transport|endosome transport via multivesicular body sorting pathway|ESCRT I complex	ko04144	Endocytosis
1161	TraesCS1B02G377300	67.7149	26.4917	108.938	4.11217	2.0399	0.0130574	0.1079	Up	0	2.87654	1.97515	7.86334	8.16737	6.42644			GO:0016021	integral component of membrane
1162	TraesCS4B02G012100	445.94	174.435	717.444	4.11295	2.04017	0.0152317	0.119696	Up	3.26691	2.58522	2.28608	12.4779	11.4278	6.48145	CTR1		GO:0005524,GO:0004672,GO:0004674,GO:0005789,GO:2000069,GO:2000035,GO:0009686,GO:0009744,GO:0009750,GO:0048510,GO:0009723,GO:0071281,GO:0001666,GO:0046777,GO:0006468	ATP binding|protein kinase activity|protein serine/threonine kinase activity|endoplasmic reticulum membrane|regulation of post-embryonic root development|regulation of stem cell division|gibberellin biosynthetic process|response to sucrose|response to fructose|regulation of timing of transition from vegetative to reproductive phase|response to ethylene|cellular response to iron ion|response to hy…	ko04075	Plant hormone signal transduction
1163	TraesCS3B02G154500	24.6673	9.6486	39.686	4.11313	2.04024	0.0384356	0.21763	Up	1.00356	0.554689	0.433768	3.32106	3.54526	2.28378	ECI2		GO:0003824	catalytic activity
1164	TraesCS6D02G149300	651.24	254.672	1047.81	4.11435	2.04066	0.0132936	0.10932	Up	18.8549	10.1419	10.7515	52.6188	58.7408	34.603	PXG7	EF-hand calcium-binding protein [Source:UniProtKB/TrEMBL;Acc:E7D433]			ko00073	Cutin, suberine and wax biosynthesis
1165	TraesCS7D02G507300	93.2195	36.4527	149.986	4.11454	2.04073	0.0184243	0.13581	Up	1.25222	1.29938	1.27629	6.01076	5.42965	3.80561	AVT6E		GO:0016021,GO:0005789,GO:0005774	integral component of membrane|endoplasmic reticulum membrane|vacuolar membrane
1166	TraesCS1A02G160800	52.6781	20.595	84.7611	4.11561	2.04111	0.0324469	0.195377	Up	0.683033	0.574874	0.747715	3.18524	3.99621	1.28551
1167	TraesCS2B02G426500	1585.11	619.589	2550.63	4.11665	2.04147	0.0107631	0.0949824	Up	31.8334	25.4831	21.2824	106.179	102.278	73.4385			GO:0005515	protein binding
1168	TraesCS6B02G382100	251.475	98.2609	404.689	4.11851	2.04212	0.0117617	0.100782	Up	7.49645	3.37886	3.23588	18.3801	29.1963	15.1572	ENT1		GO:0016021,GO:0005774,GO:0005337,GO:1901642	integral component of membrane|vacuolar membrane|nucleoside transmembrane transporter activity|nucleoside transmembrane transport
1169	TraesCS5A02G296400	918.363	358.695	1478.03	4.12058	2.04285	0.0117498	0.100727	Up	23.5433	18.063	18.2387	85.5216	87.6495	52.2734	SPAC29B12.11c
1170	TraesCS7A02G148700	142.893	55.8013	229.985	4.12149	2.04317	0.0088311	0.0830652	Up	6.97746	3.61603	2.64289	12.9184	20.0271	16.0241	TRX2		GO:0015035,GO:0045454,GO:0006662,GO:0005623	protein disulfide oxidoreductase activity|cell redox homeostasis|glycerol ether metabolic process|cell
1171	TraesCS2B02G365900	140.576	54.8769	226.276	4.12333	2.04381	0.014596	0.116372	Up	2.33686	1.42921	1.83342	11.2673	9.81826	6.19148	OXI1		GO:0005524,GO:0004672,GO:0004674,GO:0006468,GO:0000166,GO:0016301,GO:0016310,GO:0016740	ATP binding|protein kinase activity|protein serine/threonine kinase activity|protein phosphorylation|nucleotide binding|kinase activity|phosphorylation|transferase activity
1172	TraesCS5B02G285400	75.9813	29.6458	122.317	4.12594	2.04472	0.0148101	0.117448	Up	0.881589	0.482567	0.44958	1.87356	3.77667	1.98733	PAP27	Purple acid phosphatase [Source:UniProtKB/TrEMBL;Acc:A0A1D5Z4E9]	GO:0046872,GO:0016787,GO:0003993	metal ion binding|hydrolase activity|acid phosphatase activity
1173	TraesCS7D02G338800	381.398	148.811	613.985	4.12595	2.04473	0.0127449	0.106292	Up	2.4333	2.48164	2.12626	11.893	8.95197	6.83886	HERK1		GO:0016021,GO:0005524,GO:0004672,GO:0006468	integral component of membrane|ATP binding|protein kinase activity|protein phosphorylation
1174	TraesCS1D02G293200	123.497	48.1828	198.81	4.12617	2.0448	0.0478666	0.249237	Up	1.35203	1.25966	1.50138	6.50353	6.15492	2.37122	SNX2B		GO:0035091	phosphatidylinositol binding
1175	TraesCS1D02G153500	39.4152	15.3773	63.4532	4.12643	2.04489	0.0266926	0.173566	Up	0.409333	0.295195	0.208705	1.43954	1.04159	1.01191	PCMP-H8		GO:0008270,GO:0005515	zinc ion binding|protein binding
1176	TraesCS1A02G238700	418.817	163.386	674.248	4.12671	2.04499	0.00562189	0.061203	Up	4.96229	5.491	7.92425	13.7362	41.2018	27.8319	ncd-2		GO:0003824,GO:0055114,GO:0018580	catalytic activity|oxidation-reduction process|nitronate monooxygenase activity
1177	TraesCS3A02G189300	353.142	137.75	568.533	4.12727	2.04519	0.0319967	0.193715	Up	3.35435	3.62394	4.34803	18.461	17.1581	7.41579		Pyruvate kinase [Source:UniProtKB/TrEMBL;Acc:A0A1D5WW05]	GO:0003824,GO:0000287,GO:0006096,GO:0004743,GO:0016301,GO:0030955,GO:0016310,GO:0016740	catalytic activity|magnesium ion binding|glycolytic process|pyruvate kinase activity|kinase activity|potassium ion binding|phosphorylation|transferase activity	ko01200,ko00620,ko00230,ko01230,ko00010	Carbon metabolism|Pyruvate metabolism|Purine metabolism|Biosynthesis of amino acids|Glycolysis / Gluconeogenesis
1178	TraesCS6D02G152800	32.1875	12.5548	51.8203	4.12753	2.04528	0.0155284	0.121141	Up	0.683358	0.296615	0.286198	1.12282	1.6696	2.18164	UVR8
1179	TraesCS3A02G498900	14.7077	5.73657	23.6788	4.12769	2.04533	0.0305762	0.18849	Up	0	0.314092	0.257139	0.289084	1.5403	1.12397	At5g35370
1180	TraesCS3B02G160100	742.837	289.666	1196.01	4.12892	2.04577	0.0121968	0.103288	Up	7.4407	8.83821	8.77054	53.3399	52.9421	28.7588	CSE		GO:0016021,GO:0016020	integral component of membrane|membrane
1181	TraesCS7A02G222400	47.2018	18.4001	76.0034	4.1306	2.04635	0.0465776	0.245247	Up	0	0	1.92329	0.478793	2.90608	8.52933	YNR064C		GO:0003824	catalytic activity
1182	TraesCS6A02G272000	385.284	150.188	620.381	4.1307	2.04639	0.0157116	0.122177	Up	5.23789	3.19577	3.25943	19.9992	16.0811	10.6786			GO:0016021	integral component of membrane
1183	TraesCS1A02G206800	32.3302	12.6026	52.0578	4.13071	2.04639	0.0288168	0.1818	Up	1.01217	0.734139	1.5933	5.54213	5.07467	3.79701	SMR1
1184	TraesCS4A02G495500	1084.85	422.648	1747.04	4.13357	2.04739	0.0265928	0.173246	Up	8.15809	4.99972	4.34864	23.3796	29.0561	10.188	ML2		GO:0003676,GO:0003723	nucleic acid binding|RNA binding
1185	TraesCS5D02G534100	155.293	60.488	250.099	4.13468	2.04778	0.0317415	0.192708	Up	0.503659	0.63372	0.829443	3.42427	2.34283	1.631
1186	TraesCS1A02G362100	134.419	52.3424	216.495	4.13614	2.04828	0.0124093	0.104367	Up	2.67337	1.96085	1.96958	8.57811	12.6876	6.92327
1187	TraesCS6A02G378500	38.3953	14.9476	61.843	4.13731	2.04869	0.0105879	0.0939021	Up	0.835703	0.531975	0.571435	1.05093	4.91598	3.97832	NAC031		GO:0005634,GO:0003677,GO:0006355	nucleus|DNA binding|regulation of transcription, DNA-templated
1188	TraesCS7A02G447300	217.022	84.3993	349.644	4.14274	2.05059	0.0338462	0.200576	Up	1.60035	1.31285	1.54408	8.11196	5.25851	3.82743	SYT3		GO:0016021,GO:0008289,GO:0006869	integral component of membrane|lipid binding|lipid transport
1189	TraesCS1B02G090400	493.241	191.723	794.758	4.14533	2.05149	0.00698709	0.0710353	Up	1.4799	4.86631	4.51143	14.7641	13.68	13.4079	MTP1		GO:0016021,GO:0055085,GO:0008324,GO:0006812	integral component of membrane|transmembrane transport|cation transmembrane transporter activity|cation transport
1190	TraesCS6B02G392900	58.2756	22.6512	93.8999	4.14547	2.05153	0.016339	0.125484	Up	0.856872	0.730407	1.24416	4.72773	5.18612	3.56058	bem46
1191	TraesCS2A02G340000	703.556	273.46	1133.65	4.14558	2.05157	0.046898	0.246178	Up	6.30925	4.16369	4.66884	27.3422	21.5465	10.4908	CRY1		GO:0009882,GO:0009785	blue light photoreceptor activity|blue light signaling pathway
1192	TraesCS4B02G059400	51.9714	20.1901	83.7528	4.14822	2.05249	0.0484506	0.251005	Up	2.43575	0.762351	1.13004	7.74905	9.05141	2.10836
1193	TraesCS4B02G315400	19.1096	7.4219	30.7973	4.14951	2.05294	0.0292075	0.183269	Up	0.350405	0.0752619	0.312819	0.137541	1.4106	1.32563	CRCK2		GO:0005524,GO:0004672,GO:0004674,GO:0009555,GO:0006468	ATP binding|protein kinase activity|protein serine/threonine kinase activity|pollen development|protein phosphorylation
1194	TraesCS5A02G193500	452.761	175.839	729.682	4.1497	2.05301	0.03313	0.198119	Up	7.91277	7.93288	5.93933	32.5016	36.0224	13.539	HIRL2	Hypersensitive induced reaction protein 2 [Source:UniProtKB/TrEMBL;Acc:F1JYU6]
1195	TraesCSU02G007200	90.8427	35.2782	146.407	4.15008	2.05314	0.0482424	0.250372	Up	1.09487	0.923737	0.952132	5.65603	4.50731	2.12999
1196	TraesCS3D02G438800	230.424	89.422	371.426	4.15363	2.05437	0.0117786	0.100856	Up	2.30925	1.66794	4.081	8.55344	14.9259	6.68822	CBP1	Carboxypeptidase [Source:UniProtKB/TrEMBL;Acc:A0A1D5WC89]	GO:0004185,GO:0005777,GO:0006508	serine-type carboxypeptidase activity|peroxisome|proteolysis
1197	TraesCS3D02G543500	152.593	59.1982	245.988	4.15533	2.05496	0.0162343	0.124946	Up	1.03468	1.72357	1.26652	7.73158	6.87732	3.37185	IQD1		GO:0005515	protein binding
1198	TraesCS1B02G242500	219.409	85.1153	353.703	4.15557	2.05505	0.0398584	0.222761	Up	1.00684	0.987015	0.85964	4.7942	4.56061	1.70027	PLDZETA1	Phospholipase [Source:UniProtKB/TrEMBL;Acc:A0A1D5S8W4]	GO:0003824,GO:0004630,GO:0006654,GO:0048017,GO:0005622,GO:0016042,GO:0070290	catalytic activity|phospholipase D activity|phosphatidic acid biosynthetic process|inositol lipid-mediated signaling|intracellular|lipid catabolic process|N-acylphosphatidylethanolamine-specific phospholipase D activity	ko00564,ko04024,ko04144,ko00565,ko04072,ko04014,ko04071	Glycerophospholipid metabolism|cAMP signaling pathway|Endocytosis|Ether lipid metabolism|Phospholipase D signaling pathway|Ras signaling pathway|Sphingolipid signaling pathway
1199	TraesCS6D02G331800	62.7184	24.3167	101.12	4.15845	2.05605	0.0210811	0.147985	Up	1.13067	1.1553	0.617072	4.04815	4.74161	2.28808			GO:0016021	integral component of membrane
1200	TraesCS5A02G557400	230.471	89.3421	371.601	4.1593	2.05634	0.0275992	0.177049	Up	0.723545	0.547145	0.764764	3.00089	2.89926	1.31146	At3g51120		GO:0046872,GO:0003677,GO:0005515	metal ion binding|DNA binding|protein binding
1201	TraesCS5D02G369200	246.232	95.4465	397.018	4.15959	2.05644	0.0108264	0.0953941	Up	2.0397	1.51633	1.22993	7.80793	8.87682	6.03015	Os09g0558000		GO:0003824,GO:0004722,GO:0043169,GO:0006470,GO:0046872	catalytic activity|protein serine/threonine phosphatase activity|cation binding|protein dephosphorylation|metal ion binding
1202	TraesCS2D02G600100	1835.22	711.32	2959.12	4.16004	2.0566	0.0326397	0.196208	Up	64.0025	36.3745	35.5419	204.501	332.181	87.7876	TSJT1	WALI7 [Source:UniProtKB/TrEMBL;Acc:E0WC53]
1203	TraesCS1B02G139900	43.2373	16.7575	69.7172	4.16035	2.0567	0.0189077	0.138178	Up	0.396907	1.51983	2.39071	7.05304	6.14039	5.18932
1204	TraesCS2A02G317800	62.3652	24.1667	100.564	4.16124	2.05701	0.0114263	0.0988426	Up	1.30256	1.36745	0.756271	4.1023	6.06692	5.0178
1205	TraesCS1B02G441400	45.15	17.4905	72.8095	4.16281	2.05756	0.011869	0.101391	Up	0.883179	0.529206	0.865106	2.81103	4.05092	4.42893	PP2C51		GO:0046872,GO:0003824,GO:0004722,GO:0043169,GO:0006470	metal ion binding|catalytic activity|protein serine/threonine phosphatase activity|cation binding|protein dephosphorylation	ko04075	Plant hormone signal transduction
1206	TraesCS4D02G229200	498.832	193.206	804.458	4.16373	2.05788	0.0133101	0.109386	Up	5.27273	4.12074	3.79213	20.3465	17.6715	11.336
1207	TraesCS2A02G255300	43.8043	16.9659	70.6426	4.16379	2.0579	0.0291333	0.183004	Up	0.265834	0.387382	0.407529	1.8091	1.54061	0.949282	At2g16250		GO:0005524,GO:0004672,GO:0006468	ATP binding|protein kinase activity|protein phosphorylation
1208	TraesCS3D02G377300	167.033	64.6789	269.387	4.16499	2.05831	0.0119306	0.101689	Up	5.29425	3.25906	3.09128	14.3675	26.0294	11.4603	MYB330	R2R3-MYB protein [Source:UniProtKB/TrEMBL;Acc:G9DR74]	GO:0003677,GO:0005634	DNA binding|nucleus
1209	TraesCS4D02G068200	132.953	51.4491	214.456	4.16832	2.05947	0.0167067	0.12749	Up	1.3166	1.1618	1.23602	6.11173	6.55535	3.34789			GO:0003700,GO:0043565,GO:0005634,GO:0006355	DNA-binding transcription factor activity|sequence-specific DNA binding|nucleus|regulation of transcription, DNA-templated
1210	TraesCSU02G030300	47.2728	18.2875	76.258	4.16994	2.06003	0.00878487	0.0828066	Up	0.347854	0.459657	0.678939	2.82311	1.83473	3.19205	CYP89A9		GO:0020037,GO:0004497,GO:0005506,GO:0016705,GO:0055114	heme binding|monooxygenase activity|iron ion binding|oxidoreductase activity, acting on paired donors, with incorporation or reduction of molecular oxygen|oxidation-reduction process
1211	TraesCS1A02G193200	482.899	186.746	779.052	4.17171	2.06064	0.0110966	0.0969855	Up	5.55358	4.16067	4.7998	25.9611	22.2146	13.4136	MYC2		GO:0046983	protein dimerization activity	ko04075	Plant hormone signal transduction
1212	TraesCS2B02G133200	2200.52	850.983	3550.07	4.17172	2.06064	0.0022932	0.0329061	Up	35.7968	30.3348	44.8518	130.631	165.628	265.508	SRP
1213	TraesCS1D02G403300	330.359	127.749	532.969	4.172	2.06074	0.0142233	0.114345	Up	7.88817	3.88835	4.26997	22.1471	38.4064	13.1026	CYP71D7		GO:0016021,GO:0020037,GO:0004497,GO:0005506,GO:0016705,GO:0055114	integral component of membrane|heme binding|monooxygenase activity|iron ion binding|oxidoreductase activity, acting on paired donors, with incorporation or reduction of molecular oxygen|oxidation-reduction process
1214	TraesCS3D02G403000	429.556	165.888	693.224	4.17887	2.06311	0.00530535	0.0588281	Up	5.80613	4.42807	7.08092	19.813	34.0847	27.0708	NCS1		GO:0046872,GO:0016491,GO:0055114	metal ion binding|oxidoreductase activity|oxidation-reduction process
1215	TraesCS6A02G108300	627.13	242.1	1012.16	4.18075	2.06376	0.00557772	0.0608791	Up	5.75737	5.41081	8.01498	26.657	25.0716	29.0168	NAM-A1		GO:0005634,GO:0003677,GO:0006355	nucleus|DNA binding|regulation of transcription, DNA-templated
1216	TraesCS5A02G125200	89.0776	34.382	143.773	4.18164	2.06407	0.0437901	0.235987	Up	0.435294	0.69528	0.508838	2.38531	2.21854	0.933399	LHW		GO:0046983,GO:0003700,GO:0005634,GO:0048364	protein dimerization activity|DNA-binding transcription factor activity|nucleus|root development
1217	TraesCS5A02G515900	162.999	62.9102	263.087	4.18194	2.06417	0.0237161	0.160464	Up	1.33685	1.04569	1.00138	6.44674	4.55268	3.39987	ATG1A		GO:0006914,GO:0005524,GO:0004672,GO:0005776,GO:0006468	autophagy|ATP binding|protein kinase activity|autophagosome|protein phosphorylation	ko04140,ko04150,ko04139	Regulation of autophagy|mTOR signaling pathway|Regulation of mitophagy - yeast
1218	TraesCS2A02G233100	237.117	91.5048	382.729	4.18261	2.0644	0.0246058	0.164414	Up	3.625	2.65961	2.29051	14.4105	12.1044	7.013	Os07g0507000		GO:0003824,GO:0004722,GO:0006470	catalytic activity|protein serine/threonine phosphatase activity|protein dephosphorylation
1219	TraesCS2A02G414500	168.825	65.1443	272.505	4.1831	2.06457	0.0167132	0.127527	Up	2.97429	2.6464	2.50033	13.0608	13.2907	6.20736			GO:0016021	integral component of membrane
1220	TraesCS7D02G333500	41.3667	15.9467	66.7867	4.18811	2.0663	0.025183	0.167225	Up	0.438614	0.196654	0.469615	1.8088	1.22976	1.1116	NMAT1		GO:0006397,GO:0005739,GO:0007005,GO:0000374,GO:2001006,GO:0090615,GO:0000373,GO:0010896,GO:0006521,GO:0010228,GO:0009845	mRNA processing|mitochondrion|mitochondrion organization|Group III intron splicing|regulation of cellulose biosynthetic process|mitochondrial mRNA processing|Group II intron splicing|regulation of triglyceride catabolic process|regulation of cellular amino acid metabolic process|vegetative to reproductive phase transition of meristem|seed germination
1221	TraesCS2D02G513800	129.399	49.8827	208.916	4.18814	2.06631	0.0147568	0.117133	Up	1.83676	2.54592	3.88832	14.6502	18.375	7.71097	IRX15-L		GO:0045492	xylan biosynthetic process
1222	TraesCS6D02G177100	94.5088	36.4307	152.587	4.18841	2.0664	0.0123154	0.103885	Up	1.06428	0.922592	0.73907	3.37059	3.45809	2.97694	At1g14780
1223	TraesCS7A02G465100	142.352	54.8576	229.847	4.18989	2.06691	0.0190228	0.138728	Up	1.02786	0.778054	0.734257	4.66367	3.26582	2.39437	At1g04390		GO:0005515	protein binding
1224	TraesCS2A02G425200	35.3389	13.6165	57.0613	4.19059	2.06715	0.0372402	0.21327	Up	0.17745	0.514498	0.233904	0.862383	2.90049	0.983644	CYP99A3		GO:0020037,GO:0004497,GO:0005506,GO:0016705,GO:0055114	heme binding|monooxygenase activity|iron ion binding|oxidoreductase activity, acting on paired donors, with incorporation or reduction of molecular oxygen|oxidation-reduction process
1225	TraesCS5A02G306400	48.2311	18.5794	77.8828	4.19189	2.0676	0.00791219	0.0770004	Up	0.340547	0.533958	4.47622	6.35755	11.9313	9.87955	MYC2		GO:0046983	protein dimerization activity
1226	TraesCS5A02G123300	19.673	7.57739	31.7687	4.19256	2.06783	0.0431926	0.234027	Up	0.381683	0.449797	0.155824	2.09301	1.86987	1.30729
1227	TraesCS5B02G066700	165.594	63.7572	267.431	4.19453	2.06851	0.0337806	0.200321	Up	2.18551	1.14798	1.63213	7.11815	8.35435	2.95184	CNX2		GO:0046872,GO:0003824,GO:0051539,GO:0051536,GO:0006777,GO:0019008	metal ion binding|catalytic activity|4 iron, 4 sulfur cluster binding|iron-sulfur cluster binding|Mo-molybdopterin cofactor biosynthetic process|molybdopterin synthase complex	ko04122,ko00790	Sulfur relay system|Folate biosynthesis
1228	TraesCS3B02G363300	307.93	118.555	497.304	4.19471	2.06857	0.0116267	0.100028	Up	2.34878	2.08154	1.72302	9.87705	8.36581	6.74126	SCAB1		GO:0003779,GO:0007015,GO:0010119	actin binding|actin filament organization|regulation of stomatal movement
1229	TraesCS4A02G372600	641.635	247.027	1036.24	4.19485	2.06862	0.00879683	0.0828711	Up	13.6807	8.3848	7.5303	47.4431	43.2035	34.8304	HIR4	Hypersensitive induced response protein 4 [Source:UniProtKB/TrEMBL;Acc:C0KTS8]	GO:0005886,GO:0005794,GO:0005774,GO:0009506	plasma membrane|Golgi apparatus|vacuolar membrane|plasmodesma
1230	TraesCS2B02G130900	576.738	221.995	931.482	4.19596	2.069	0.0445811	0.238645	Up	7.84056	6.08362	6.18017	33.4369	24.9973	15.8715	IAN9		GO:0005525	GTP binding
1231	TraesCSU02G007800	302.045	116.226	487.865	4.19756	2.06955	0.0152488	0.119774	Up	3.28512	3.01711	1.9131	12.9778	12.8429	6.33051	DAR1		GO:0046872	metal ion binding
1232	TraesCS4B02G222700	1284.49	494.024	2074.95	4.2001	2.07042	0.0121566	0.103034	Up	8.41667	6.66518	8.66127	32.7334	32.7659	19.0328	VHA-a3	V-type proton ATPase subunit a [Source:UniProtKB/TrEMBL;Acc:A0A1D5XH30]	GO:0016021,GO:0015991,GO:0015078,GO:0033179,GO:0000220,GO:0016020,GO:0006811,GO:1902600	integral component of membrane|GO_0015991|proton transmembrane transporter activity|proton-transporting V-type ATPase, V0 domain|vacuolar proton-transporting V-type ATPase, V0 domain|membrane|ion transport|proton transmembrane transport	ko04145,ko00190,ko04142	Phagosome|Oxidative phosphorylation|Lysosome
1233	TraesCS2B02G394500	36.0639	13.8688	58.259	4.20074	2.07064	0.0304526	0.187916	Up	0.11615	0.157985	0.777756	1.28716	2.16915	0.748155	YSL13		GO:0016021,GO:0055085	integral component of membrane|transmembrane transport
1234	TraesCS4D02G363100	192.734	74.1098	311.359	4.20132	2.07084	0.0140584	0.113583	Up	2.55485	2.98282	2.13322	12.9563	12.0121	6.8886	SRG1		GO:0016491,GO:0055114,GO:0046872	oxidoreductase activity|oxidation-reduction process|metal ion binding
1235	TraesCS6A02G111200	54.6588	21.0159	88.3018	4.20167	2.07096	0.0142154	0.114315	Up	0.718305	0.579808	0.598993	2.62611	2.56582	2.64086	ABC1
1236	TraesCS1B02G278200	385.676	148.287	623.065	4.20174	2.07099	0.0203171	0.144765	Up	9.19496	8.10189	5.3894	37.2336	35.5173	16.9169	sap49		GO:0003676	nucleic acid binding	ko03040	Spliceosome
1237	TraesCS2A02G216800	50.856	19.5505	82.1615	4.20253	2.07126	0.0307114	0.189004	Up	2.03115	1.06908	1.00851	6.94062	7.32208	2.77254	CRK6
1238	TraesCS6B02G298800	2213.25	850.702	3575.8	4.20336	2.07154	0.00936961	0.0865268	Up	32.5594	13.8897	25.3224	130.64	136.556	82.9095	NCED1		GO:0016702,GO:0055114,GO:0046872,GO:0009507,GO:0010287	oxidoreductase activity, acting on single donors with incorporation of molecular oxygen, incorporation of two atoms of oxygen|oxidation-reduction process|metal ion binding|chloroplast|plastoglobule	ko00906	Carotenoid biosynthesis
1239	TraesCS6D02G276900	518.317	199.172	837.462	4.20473	2.07201	0.00730971	0.073109	Up	12.8748	8.17153	6.29851	32.5344	55.4987	34.6961	PXG5	Caleosin [Source:UniProtKB/TrEMBL;Acc:W5GZH6]	GO:0005509	calcium ion binding
1240	TraesCS3D02G236100	99.3256	38.1639	160.487	4.20522	2.07218	0.015318	0.120048	Up	0.962857	0.99256	1.2299	5.06276	5.21849	3.1312	At1g28600		GO:0016788	hydrolase activity, acting on ester bonds
1241	TraesCS2D02G250700	743.368	285.622	1201.11	4.20526	2.07219	0.0128337	0.106736	Up	39.3405	20.2759	18.381	118.45	111.064	62.0896	ROSY1		GO:0005622,GO:0032366,GO:0005623	intracellular|intracellular sterol transport|cell
1242	TraesCS6A02G242400	82.1928	31.5776	132.808	4.20577	2.07237	0.00860727	0.0816422	Up	1.96806	0.910704	0.206409	4.5287	3.26873	5.68358	At4g17550		GO:0016021,GO:0022857,GO:0055085	integral component of membrane|transmembrane transporter activity|transmembrane transport
1243	TraesCS7A02G159000	449.377	172.632	726.123	4.20619	2.07251	0.0122902	0.1038	Up	2.90899	2.23738	2.84575	10.5906	11.8285	6.30479	SAC3		GO:0042578	phosphoric ester hydrolase activity
1244	TraesCS2A02G397000	144.374	55.4332	233.315	4.20894	2.07346	0.0313088	0.191124	Up	1.69839	1.24199	1.21834	6.92018	7.00129	2.64395	ROPGAP3		GO:0007165	signal transduction
1245	TraesCS7B02G222600	115.895	44.4834	187.307	4.21073	2.07407	0.0359195	0.208311	Up	1.09669	0.662346	0.727255	3.99366	2.02516	2.23948	BDF2		GO:0005515	protein binding
1246	TraesCS2A02G462700	114.88	44.0826	185.678	4.21204	2.07452	0.0124468	0.104587	Up	1.52384	1.12595	1.21022	5.27968	5.26038	3.89268	CRPK1		GO:0005524,GO:0004672,GO:0004674,GO:0006468	ATP binding|protein kinase activity|protein serine/threonine kinase activity|protein phosphorylation
1247	TraesCS2A02G540200	37.2867	14.306	60.2673	4.21271	2.07475	0.036378	0.210078	Up	1.04274	0.584773	0.349568	3.78451	2.49541	1.73753	At5g50100		GO:0015035,GO:0005739,GO:0042246	protein disulfide oxidoreductase activity|mitochondrion|tissue regeneration
1248	TraesCS5A02G261500	339.166	130.108	548.224	4.21362	2.07506	0.0108491	0.0955414	Up	7.69976	6.308	5.90765	22.982	30.6445	16.106
1249	TraesCS5B02G507100	161.223	61.846	260.6	4.21369	2.07508	0.00858919	0.0815127	Up	3.52894	3.11993	3.82722	14.207	17.3259	13.8647	FAHD2		GO:0003824	catalytic activity	ko00350	Tyrosine metabolism
1250	TraesCS2D02G164400	312.224	119.736	504.712	4.21521	2.0756	0.0152275	0.119689	Up	4.49206	2.84764	2.75477	14.0071	16.6785	7.29331			GO:0016021	integral component of membrane
1251	TraesCS3B02G123700	265.923	101.941	429.904	4.21718	2.07628	0.00805632	0.0779485	Up	9.82916	11.1714	10.5504	50.1894	61.1482	41.5935	GRXS2		GO:0009055,GO:0015035,GO:0045454,GO:0005623,GO:0055114,GO:0022900	electron transfer activity|protein disulfide oxidoreductase activity|cell redox homeostasis|cell|oxidation-reduction process|electron transport chain
1252	TraesCS6B02G290900	1544.28	591.973	2496.58	4.21739	2.07635	0.00866705	0.0819999	Up	19.6331	18.0601	23.143	89.6619	91.2465	64.241	At4g17830		GO:0016787,GO:0005829,GO:0008777,GO:0006592	hydrolase activity|cytosol|acetylornithine deacetylase activity|ornithine biosynthetic process	ko01230,ko00220,ko01210	Biosynthesis of amino acids|Arginine biosynthesis|2-Oxocarboxylic acid metabolism
1253	TraesCS6D02G084500	31.7244	12.1598	51.2891	4.21794	2.07654	0.0103018	0.0920061	Up	0.829231	0.282316	0.726562	2.04207	1.55176	4.36106	Os02g0134000		GO:0006629,GO:0003824,GO:0009058,GO:0005829,GO:0015937,GO:0019915,GO:0009651,GO:0080020,GO:0004595	lipid metabolic process|catalytic activity|biosynthetic process|cytosol|coenzyme A biosynthetic process|lipid storage|response to salt stress|regulation of coenzyme A biosynthetic process|pantetheine-phosphate adenylyltransferase activity	ko00770	Pantothenate and CoA biosynthesis
1254	TraesCS4A02G328600	527.547	202.203	852.891	4.21799	2.07656	0.00828263	0.079505	Up	6.58573	4.00337	6.42232	27.2443	34.759	21.8548	AKR2A		GO:0005515	protein binding
1255	TraesCS7D02G153200	652.784	250.173	1055.39	4.21865	2.07678	0.0382571	0.217013	Up	7.7033	5.12053	6.41779	32.9142	27.8663	13.2292
1256	TraesCS4B02G178100	187.583	71.8829	303.282	4.21912	2.07694	0.0119005	0.10152	Up	1.86741	2.1608	2.28377	6.13798	12.7204	5.22428	CIPK31	Non-specific serine/threonine protein kinase [Source:UniProtKB/TrEMBL;Acc:A0A0D3R0R3]	GO:0005524,GO:0004672,GO:0004674,GO:0007165,GO:0006468,GO:0000166,GO:0016301,GO:0016310,GO:0016740	ATP binding|protein kinase activity|protein serine/threonine kinase activity|signal transduction|protein phosphorylation|nucleotide binding|kinase activity|phosphorylation|transferase activity
1257	TraesCS2B02G357400	168.504	64.562	272.447	4.21992	2.07722	0.0130666	0.107926	Up	2.92668	2.24057	1.47667	9.96904	8.53803	6.36371			GO:0004553,GO:0005975	hydrolase activity, hydrolyzing O-glycosyl compounds|carbohydrate metabolic process
1258	TraesCS2D02G229900	1188.36	455.302	1921.43	4.22011	2.07728	0.010057	0.0905875	Up	18.842	15.3096	17.3959	84.8525	93.5963	52.5439	ATG8A	Autophagy-related protein [Source:UniProtKB/TrEMBL;Acc:Q7XY24]	GO:0006914,GO:0005737	autophagy|cytoplasm	ko04068,ko04140,ko04139	FoxO signaling pathway|Regulation of autophagy|Regulation of mitophagy - yeast
1259	TraesCS3B02G079300	40.5017	15.5126	65.4907	4.22177	2.07785	0.0268809	0.174112	Up	3.60286	1.62825	0.851512	3.46751	9.97851	5.77904
1260	TraesCS1A02G128100	117.326	44.9304	189.721	4.22254	2.07811	0.0465395	0.245147	Up	2.95216	1.29063	1.62433	11.128	7.28973	5.48867
1261	TraesCS5A02G486800	183.655	70.324	296.986	4.22311	2.07831	0.00424399	0.0502856	Up	4.01392	2.10267	1.31313	5.68922	17.1015	14.9893	Bx8		GO:0016758	transferase activity, transferring hexosyl groups
1262	TraesCS4D02G223300	1206.93	462.111	1951.74	4.22353	2.07845	0.0127546	0.106321	Up	9.52874	6.62415	7.89967	33.9278	31.9249	18.1681	VHA-a3	V-type proton ATPase subunit a [Source:UniProtKB/TrEMBL;Acc:A0A341UWA7]	GO:0015078,GO:0033179,GO:0000220	proton transmembrane transporter activity|proton-transporting V-type ATPase, V0 domain|vacuolar proton-transporting V-type ATPase, V0 domain	ko04145,ko00190,ko04142	Phagosome|Oxidative phosphorylation|Lysosome
1263	TraesCS4B02G052800	18.739	7.17409	30.304	4.22409	2.07864	0.0413296	0.22767	Up	0.119144	0.273822	0.133201	1.01341	0.903559	0.669772
1264	TraesCS2D02G160700	171.212	65.5465	276.878	4.22415	2.07866	0.0275235	0.176787	Up	1.97435	3.11495	2.68204	12.4821	11.6182	5.87301	RD21A		GO:0008234,GO:0006508	cysteine-type peptidase activity|proteolysis	ko04145,ko04210,ko04142	Phagosome|Apoptosis|Lysosome
1265	TraesCS5A02G022200	2032.78	778.167	3287.39	4.22454	2.07879	0.00884917	0.0831588	Up	20.5128	18.484	25.793	89.2537	82.0956	61.8963	CYS1	Cysteine synthase [Source:UniProtKB/TrEMBL;Acc:A0A1D5YTX8]	GO:0006535,GO:0004124,GO:0005737,GO:0016740,GO:0008652,GO:0019344	cysteine biosynthetic process from serine|cysteine synthase activity|cytoplasm|transferase activity|cellular amino acid biosynthetic process|cysteine biosynthetic process	ko01200,ko01230,ko00270,ko00920	Carbon metabolism|Biosynthesis of amino acids|Cysteine and methionine metabolism|Sulfur metabolism
1266	TraesCS2D02G117900	1827.57	699.554	2955.59	4.22497	2.07894	0.0109628	0.0962885	Up	12.4118	13.2254	9.26682	50.2317	58.0168	30.9854	XYLA	Xylose isomerase [Source:UniProtKB/TrEMBL;Acc:W5C4N4]	GO:0005975,GO:0046872,GO:0005783,GO:0005794,GO:0005774,GO:0009045,GO:0042732,GO:0016853	carbohydrate metabolic process|metal ion binding|endoplasmic reticulum|Golgi apparatus|vacuolar membrane|xylose isomerase activity|D-xylose metabolic process|isomerase activity	ko00040,ko00051	Pentose and glucuronate interconversions|Fructose and mannose metabolism
1267	TraesCS1D02G116200	27.1769	10.4019	43.9518	4.22536	2.07907	0.0264518	0.172659	Up	0	0.16498	0.337648	0.653718	0.362902	0.175843
1268	TraesCS5D02G386800	283.873	108.634	459.112	4.22622	2.07937	0.00960966	0.0878394	Up	2.47254	2.02856	3.06902	9.30863	12.7067	8.19831	STY13		GO:0005524,GO:0004672,GO:0006468	ATP binding|protein kinase activity|protein phosphorylation
1269	TraesCS3D02G340500	542.697	207.664	877.73	4.22669	2.07953	0.0323546	0.195041	Up	1.36144	0.919156	14.9792	24.5375	41.1266	14.1481	SEN102		GO:0008234,GO:0006508	cysteine-type peptidase activity|proteolysis
1270	TraesCS4A02G307800	398.981	152.608	645.355	4.22885	2.08026	0.0118865	0.101465	Up	7.07069	4.48345	2.98053	26.4895	27.4244	15.3256	PYRP2		GO:0016787,GO:0009231,GO:0043621,GO:0006468	hydrolase activity|riboflavin biosynthetic process|protein self-association|protein phosphorylation
1271	TraesCS4D02G158200	247.296	94.5876	400.005	4.22893	2.08029	0.0440437	0.236717	Up	2.9031	2.56427	2.68732	13.8867	12.9893	4.77764	dpb3		GO:0005634,GO:0046982	nucleus|protein heterodimerization activity
1272	TraesCS5A02G206600	170.667	65.2643	276.069	4.23001	2.08066	0.0281371	0.179225	Up	1.42499	1.58225	1.83283	8.86138	7.96142	3.44815	LTA2	Dihydrolipoamide acetyltransferase component of pyruvate dehydrogenase complex [Source:UniProtKB/TrEMBL;Acc:A0A341V035]	GO:0016746	transferase activity, transferring acyl groups	ko00020,ko01200,ko00620,ko00010	Citrate cycle (TCA cycle)|Carbon metabolism|Pyruvate metabolism|Glycolysis / Gluconeogenesis
1273	TraesCS6B02G090200	23.3961	8.94479	37.8473	4.23122	2.08107	0.0126697	0.105856	Up	0.100503	0.10001	0.293688	0.386338	0.740447	1.16537	URT1
1274	TraesCS4D02G125100	671.74	256.725	1086.76	4.23316	2.08173	0.00658844	0.0683265	Up	6.23017	3.06161	6.52068	17.79	23.5832	18.3543	ASD1		GO:0046373,GO:0046556	L-arabinose metabolic process|alpha-L-arabinofuranosidase activity	ko00520	Amino sugar and nucleotide sugar metabolism
1275	TraesCS3B02G050500	85.6173	32.7128	138.522	4.23448	2.08219	0.0429815	0.233389	Up	1.92255	0.968674	0.93363	7.02942	6.06314	2.98828	ER-ANT1		GO:0016021,GO:0022857,GO:0055085,GO:0005743	integral component of membrane|transmembrane transporter activity|transmembrane transport|mitochondrial inner membrane	ko04020,ko04022	Calcium signaling pathway|cGMP-PKG signaling pathway
1276	TraesCS1D02G122100	637.312	243.328	1031.3	4.23831	2.08349	0.0309741	0.189965	Up	7.72603	6.58878	8.28749	33.7728	25.7269	16.291
1277	TraesCS5A02G243000	22.5125	8.59351	36.4315	4.23942	2.08387	0.0303779	0.187658	Up	0.383216	0.204049	0.781538	2.60728	2.33932	2.01228	TCEA1		GO:0016787	hydrolase activity
1278	TraesCS6A02G322500	57.7628	22.0437	93.482	4.24075	2.08432	0.0139494	0.113084	Up	0.780306	0.582849	0.910869	3.40729	2.87506	3.40148	MTP3		GO:0016021,GO:0055085,GO:0008324,GO:0006812	integral component of membrane|transmembrane transport|cation transmembrane transporter activity|cation transport
1279	TraesCS4D02G132000	443.983	169.419	718.548	4.24125	2.08449	0.0455487	0.241869	Up	8.33657	7.17785	16.8746	76.9504	66.3888	24.587	PRA1B3	PRA1 family protein [Source:UniProtKB/TrEMBL;Acc:W5EP09]	GO:0016021	integral component of membrane
1280	TraesCS6A02G270800	736.289	280.905	1191.67	4.24227	2.08484	0.011978	0.102028	Up	2.54326	3.19331	3.65843	13.5534	15.656	7.33025	YAK1		GO:0005524,GO:0004672,GO:0006468	ATP binding|protein kinase activity|protein phosphorylation
1281	TraesCS2D02G401800	153.864	58.6944	249.033	4.24288	2.08504	0.0337261	0.200116	Up	1.88999	1.08919	1.13928	6.28582	5.48338	2.98571	LAZ1		GO:0016021,GO:0016020	integral component of membrane|membrane
1282	TraesCS1A02G174700	509.418	194.268	824.567	4.24448	2.08559	0.0105385	0.0935673	Up	14.1686	8.23228	6.47906	57.1191	45.8833	32.9223	DBP
1283	TraesCS6A02G241700	18.8679	7.19443	30.5414	4.24515	2.08582	0.0462029	0.24408	Up	0.216485	0.420718	0.51436	2.13304	1.06025	0.813681
1284	TraesCS4A02G319400	31.8829	12.1568	51.609	4.24527	2.08586	0.0342211	0.20205	Up	0.449954	0.195923	0.384264	1.37761	1.61209	0.754601	RPPL1		GO:0043531	ADP binding
1285	TraesCS2A02G384700	222.478	84.814	360.141	4.24625	2.08619	0.00949439	0.0872611	Up	7.41191	4.8249	4.62375	25.7138	25.9115	20.0763	At4g13200
1286	TraesCS6D02G277500	384.105	146.419	621.791	4.24665	2.08633	0.0252616	0.16758	Up	20.3903	15.0207	5.92309	69.8193	80.3951	27.7628			GO:0009055	electron transfer activity
1287	TraesCS1D02G185700	111.9	42.6347	181.166	4.24926	2.08721	0.0149807	0.118401	Up	5.29454	2.81608	3.12992	19.2533	15.5339	10.6217	TIM23-1
1288	TraesCS2A02G452700	389.005	148.121	629.889	4.25252	2.08832	0.00369586	0.0456796	Up	10.2465	14.3788	16.7739	53.6808	68.2066	72.2464			GO:0004857	enzyme inhibitor activity
1289	TraesCS6B02G105400	54.6601	20.81	88.5102	4.25324	2.08856	0.00495557	0.05625	Up	0.699118	2.1127	2.06038	7.49429	4.55462	12.0173
1290	TraesCS2D02G525000	68.2824	25.9962	110.569	4.25326	2.08857	0.011434	0.0988771	Up	1.05149	0.539514	0.604178	1.85479	4.38331	3.13476
1291	TraesCS5B02G416700	812.426	309.267	1315.58	4.25387	2.08878	0.00989613	0.0895313	Up	7.56023	5.48833	8.92581	31.4092	37.2231	20.9845	CSY3	Citrate synthase [Source:UniProtKB/TrEMBL;Acc:A0A341VMQ6]	GO:0006099,GO:0046912,GO:0016740	tricarboxylic acid cycle|transferase activity, transferring acyl groups, acyl groups converted into alkyl on transfer|transferase activity	ko01230,ko00020,ko00630,ko01210,ko01200	Biosynthesis of amino acids|Citrate cycle (TCA cycle)|Glyoxylate and dicarboxylate metabolism|2-Oxocarboxylic acid metabolism|Carbon metabolism
1292	TraesCS7D02G270300	455.725	173.476	737.974	4.25403	2.08883	0.0108024	0.0952373	Up	3.04458	2.37906	3.61472	13.5453	13.1294	8.72122	PUX8		GO:0005515	protein binding
1293	TraesCS3D02G324400	96.6094	36.7692	156.45	4.25491	2.08913	0.0121485	0.102988	Up	1.00036	0.565354	1.31391	3.23952	5.4867	3.14103	ISPE		GO:0005524,GO:0009507,GO:0016114,GO:0050515	ATP binding|chloroplast|terpenoid biosynthetic process|4-(cytidine 5'-diphospho)-2-C-methyl-D-erythritol kinase activity	ko00900	Terpenoid backbone biosynthesis
1294	TraesCS4D02G006200	448.445	170.643	726.248	4.25595	2.08948	0.0115748	0.0997179	Up	11.7799	3.96735	5.75788	35.1895	38.8655	19.9126	PYRP2		GO:0016787,GO:0009231,GO:0043621,GO:0006468	hydrolase activity|riboflavin biosynthetic process|protein self-association|protein phosphorylation
1295	TraesCS2A02G379600	89.23	33.9499	144.51	4.25656	2.08969	0.021552	0.150339	Up	5.61489	2.13498	1.4323	16.7842	12.4507	7.98604
1296	TraesCS3D02G193200	91.6525	34.8608	148.444	4.25821	2.09025	0.0334326	0.199067	Up	0.55701	0.608616	0.425937	2.48778	2.11105	1.08084	ALA1	Phospholipid-transporting ATPase [Source:UniProtKB/TrEMBL;Acc:A0A341T9G2]	GO:0016021,GO:0005524,GO:0000166,GO:0000287,GO:0015914	integral component of membrane|ATP binding|nucleotide binding|magnesium ion binding|phospholipid transport
1297	TraesCS2D02G267800	121.039	46.0354	196.043	4.25854	2.09036	0.0146737	0.1167	Up	3.61077	1.9916	2.58424	13.087	17.5891	7.46173	PDX11		GO:0003824,GO:0042823,GO:0042819	catalytic activity|pyridoxal phosphate biosynthetic process|vitamin B6 biosynthetic process	ko00750	Vitamin B6 metabolism
1298	TraesCS1A02G078800	902.045	343.049	1461.04	4.25899	2.09051	0.00408768	0.0489733	Up	32.6097	16.2875	18.1501	89.1208	90.6132	114.094	GSTF1		GO:0005515	protein binding	ko00982,ko00480,ko00980	Drug metabolism - cytochrome P450|Glutathione metabolism|Metabolism of xenobiotics by cytochrome P450
1299	TraesCS5A02G253200	497.694	189.273	806.115	4.25901	2.09052	0.00665907	0.0687918	Up	4.26886	1.32778	4.50455	8.78271	19.9444	11.5354	CSLE6		GO:0016021,GO:0016020,GO:0016760,GO:0030244,GO:0071555	integral component of membrane|membrane|cellulose synthase (UDP-forming) activity|cellulose biosynthetic process|cell wall organization
1300	TraesCS5B02G234500	195.575	74.3746	316.775	4.25919	2.09058	0.0173667	0.130818	Up	3.08122	1.38996	1.60264	6.21812	15.9843	5.95579			GO:0016021	integral component of membrane
1301	TraesCS3D02G536300	8127.53	3090.66	13164.4	4.25942	2.09066	0.00340987	0.0433419	Up	384.386	338.393	431.998	1415.17	1773.04	2057.08	MT2C		GO:0046872	metal ion binding
1302	TraesCS5A02G232700	32.6838	12.4209	52.9466	4.26269	2.09176	0.0236503	0.160167	Up	0.366306	0.393861	0.80782	2.74005	2.93324	2.08628	HOX27		GO:0003700,GO:0043565,GO:0005634,GO:0003677,GO:0006355	DNA-binding transcription factor activity|sequence-specific DNA binding|nucleus|DNA binding|regulation of transcription, DNA-templated
1303	TraesCS5B02G157300	292.813	111.275	474.352	4.26289	2.09183	0.0228458	0.156452	Up	6.07507	3.59683	6.46302	29.874	32.1021	10.7038	MYB44		GO:0003677	DNA binding
1304	TraesCS6D02G327400	713.515	271.116	1155.91	4.26354	2.09205	0.0110902	0.0969656	Up	4.00942	2.26241	2.80438	12.7811	12.8407	7.70152	SIS8		GO:0005524,GO:0005515,GO:0004672,GO:0006468	ATP binding|protein binding|protein kinase activity|protein phosphorylation
1305	TraesCS7B02G210100	102.192	38.8234	165.56	4.26443	2.09235	0.0180781	0.134219	Up	1.35813	0.765351	1.49151	5.26613	4.8884	3.16162
1306	TraesCS3A02G315300	19.7644	7.50817	32.0206	4.26477	2.09247	0.0303931	0.187678	Up	0.208031	0.166436	0.388291	1.15175	1.19299	1.31402	DLO1		GO:0016491,GO:0055114	oxidoreductase activity|oxidation-reduction process
1307	TraesCS7A02G281200	356.742	135.483	578.001	4.26621	2.09295	0.0093086	0.086192	Up	3.53707	2.97898	3.06973	15.0322	18.6884	10.5075	SCPL51		GO:0004185,GO:0006508	serine-type carboxypeptidase activity|proteolysis
1308	TraesCS5A02G048600	88.8472	33.7352	143.959	4.26734	2.09334	0.0365409	0.210728	Up	1.22198	0.393085	0.788619	2.272	4.71782	1.54464	CRPK1		GO:0005524,GO:0004672,GO:0004674,GO:0006468	ATP binding|protein kinase activity|protein serine/threonine kinase activity|protein phosphorylation
1309	TraesCS7D02G237400	348.541	132.331	564.751	4.26771	2.09346	0.0175241	0.131559	Up	4.03348	3.33352	4.79274	18.4153	20.1094	8.1442
1310	TraesCS1D02G225300	300.113	113.917	486.31	4.26897	2.09389	0.0353869	0.206377	Up	1.56173	1.00985	1.17378	5.62727	5.10712	2.34654
1311	TraesCS5D02G506900	186.697	70.8603	302.535	4.26945	2.09405	0.0106166	0.0940832	Up	4.45023	4.25538	2.68387	17.5173	16.9851	12.6504	FAHD2		GO:0003824	catalytic activity	ko00350	Tyrosine metabolism
1312	TraesCS2D02G398700	332.507	126.18	538.835	4.27036	2.09436	0.0238723	0.161099	Up	7.74871	4.82846	6.10573	33.3751	29.332	14.6426	At1g12760		GO:0016021	integral component of membrane
1313	TraesCS1D02G083600	1171.63	444.496	1898.77	4.27174	2.09482	0.0077151	0.0757542	Up	16.7925	9.93567	16.8209	55.5455	71.6217	46.7285	RAP		GO:0006629,GO:0004190,GO:0006508	lipid metabolic process|aspartic-type endopeptidase activity|proteolysis
1314	TraesCS2A02G198400	607.272	230.144	984.4	4.27733	2.09671	0.028289	0.179887	Up	3.24041	3.19096	3.70959	16.6048	15.0269	6.78122	PXM16		GO:0046872,GO:0003824,GO:0004222,GO:0006508	metal ion binding|catalytic activity|metalloendopeptidase activity|proteolysis
1315	TraesCS2B02G118400	18.8407	7.13948	30.5419	4.27789	2.0969	0.0497942	0.255068	Up	0.196924	0.417527	0.256233	0.978669	2.44741	0.723378	NAC100		GO:0005634,GO:0003677,GO:0006355	nucleus|DNA binding|regulation of transcription, DNA-templated
1316	TraesCS7A02G210100	3508.46	1329.06	5687.85	4.27962	2.09748	0.0322571	0.194717	Up	32.0815	25.1281	39.9946	171.401	148.118	69.5282	ALDH2B7		GO:0016491,GO:0016620,GO:0055114	oxidoreductase activity|oxidoreductase activity, acting on the aldehyde or oxo group of donors, NAD or NADP as acceptor|oxidation-reduction process	ko00561,ko00071,ko00380,ko00310,ko00040,ko00410,ko00340,ko00620,ko00330,ko00903,ko00280,ko00625,ko00053,ko00010	Glycerolipid metabolism|Fatty acid degradation|Tryptophan metabolism|Lysine degradation|Pentose and glucuronate interconversions|beta-Alanine metabolism|Histidine metabolism|Pyruvate metabolism|Arginine and proline metabolism|Limonene and pinene degradation|Valine, leucine and isoleucine degradation|Chloroalkane and chloroalkene degradation|Ascorbate and aldarate metabolism|Glycolysis / Gluconeog…
1317	TraesCS2A02G525300	87.9886	33.331	142.646	4.27969	2.09751	0.0148208	0.117514	Up	1.06038	0.463163	0.829701	3.81468	5.42056	2.78915	PCRK1		GO:0005524,GO:0004672,GO:0006468	ATP binding|protein kinase activity|protein phosphorylation
1318	TraesCS2A02G153400	573.79	217.331	930.248	4.28033	2.09772	0.0111029	0.0969982	Up	10.6965	9.70476	6.42655	52.6783	47.4063	27.4036
1319	TraesCS2A02G249100	735.852	278.705	1193	4.2805	2.09778	0.00953138	0.0874564	Up	34.7336	19.0368	18.0024	105.279	91.1016	66.6013	ROSY1		GO:0005622,GO:0032366	intracellular|intracellular sterol transport
1320	TraesCS7B02G162600	698.486	264.468	1132.5	4.2822	2.09835	0.00931375	0.0861979	Up	11.7746	6.66365	5.3579	31.4937	38.6337	23.2253
1321	TraesCS2D02G407600	162.867	61.6652	264.069	4.28231	2.09839	0.00778498	0.0762094	Up	2.88976	2.51032	2.28016	3.72182	19.934	17.5621	CISZOG2	Glycosyltransferase [Source:UniProtKB/TrEMBL;Acc:A0A1D5UNU5]	GO:0016758	transferase activity, transferring hexosyl groups	ko00908	Zeatin biosynthesis
1322	TraesCS1D02G367000	286.591	108.507	464.675	4.28245	2.09844	0.0111888	0.0974616	Up	5.54761	4.80327	2.61721	18.876	32.2735	11.8066	A70
1323	TraesCS6D02G291400	80.5874	30.5072	130.668	4.28317	2.09868	0.0137967	0.11229	Up	0.523201	0.359225	0.773893	2.98617	2.8653	1.9178	FH16	Formin-like protein [Source:UniProtKB/TrEMBL;Acc:A0A341XGD7]
1324	TraesCS1D02G368900	200.842	75.9939	325.691	4.28574	2.09955	0.00772531	0.0757899	Up	2.50122	1.35185	1.0805	5.62907	9.24602	6.40598
1325	TraesCS7A02G213700	8.63963	3.26865	14.0106	4.28635	2.09975	0.0484856	0.251124	Up	0.437471	0.104793	0.702561	0.886577	2.46355	3.33521
1326	TraesCS2A02G128800	85.202	32.2121	138.192	4.29007	2.101	0.0165834	0.126802	Up	4.02194	2.64812	1.60708	15.0966	16.1759	8.25086	At5g39865		GO:0009055,GO:0015035,GO:0045454,GO:0005623	electron transfer activity|protein disulfide oxidoreductase activity|cell redox homeostasis|cell
1327	TraesCS5D02G489200	112.503	42.5234	182.482	4.29133	2.10143	0.0203648	0.144914	Up	0.787829	0.685611	0.841179	3.01601	5.4963	1.76037			GO:0005515	protein binding
1328	TraesCS4B02G032900	115.292	43.5711	187.014	4.29216	2.1017	0.0164865	0.126266	Up	4.17312	3.66585	2.08765	18.3264	16.6882	8.33886
1329	TraesCS4D02G030200	261.819	98.9229	424.716	4.2934	2.10212	0.0123481	0.104085	Up	1.912	2.29704	2.27429	11.3961	10.1742	5.60161
1330	TraesCS1A02G412800	151.179	57.1044	245.254	4.29483	2.1026	0.00383436	0.0468665	Up	1.20362	1.58059	3.15819	7.87729	9.47329	12.7677	OsI_21081		GO:0006629,GO:0008970	lipid metabolic process|phospholipase A1 activity
1331	TraesCS5D02G284800	660.506	249.49	1071.52	4.29485	2.10261	0.0275718	0.176996	Up	19.7298	9.0031	4.9133	66.4953	63.9844	24.924
1332	TraesCS1B02G147200	40.4678	15.2835	65.652	4.2956	2.10286	0.00627814	0.0660838	Up	0.163402	1.46515	1.01561	1.67488	3.2738	5.07665	SWEET3B	Bidirectional sugar transporter SWEET [Source:UniProtKB/TrEMBL;Acc:A0A1D5SK60]	GO:0016021,GO:0005886,GO:0008643	integral component of membrane|plasma membrane|carbohydrate transport
1333	TraesCS7B02G338200	1527.63	576.927	2478.34	4.29576	2.10291	0.00411578	0.0491702	Up	18.3621	40.9351	65.4958	191.015	177.789	195.782	ATX1		GO:0046872,GO:0030001	metal ion binding|metal ion transport
1334	TraesCS3A02G233700	70.049	26.4442	113.654	4.29787	2.10362	0.0116976	0.100462	Up	0.461899	0.851112	0.584211	2.77327	3.53018	2.51128			GO:0016021	integral component of membrane
1335	TraesCS3B02G326500	285.79	107.873	463.707	4.29864	2.10388	0.0123508	0.104088	Up	1.24998	1.08362	1.28165	5.09947	6.65986	2.84687	VOZ1		GO:0006355,GO:0048578	regulation of transcription, DNA-templated|positive regulation of long-day photoperiodism, flowering
1336	TraesCS2A02G105900	268.456	101.312	435.6	4.2996	2.1042	0.0184174	0.135784	Up	2.93013	1.30797	0.579489	7.27312	9.51451	4.02835	AGAL3	Alpha-galactosidase [Source:UniProtKB/TrEMBL;Acc:A0A341PY32]	GO:0004553,GO:0005975,GO:0003824	hydrolase activity, hydrolyzing O-glycosyl compounds|carbohydrate metabolic process|catalytic activity	ko00603,ko00561,ko00052,ko00600	Glycosphingolipid biosynthesis - globo series|Glycerolipid metabolism|Galactose metabolism|Sphingolipid metabolism
1337	TraesCS2A02G511300	76.1511	28.7369	123.565	4.29988	2.1043	0.01472	0.116952	Up	1.70101	0.911095	1.68419	8.06419	9.7297	5.22044	UGT89B1		GO:0016758	transferase activity, transferring hexosyl groups
1338	TraesCS7B02G385700	50.0316	18.876	81.1872	4.30109	2.1047	0.011657	0.100232	Up	0.472118	0.690591	0.480819	1.97294	2.91312	2.3714	APL		GO:0005634,GO:0003677	nucleus|DNA binding
1339	TraesCS3A02G254300	212.603	80.1991	345.007	4.30188	2.10497	0.00639695	0.0669211	Up	2.60986	2.21257	2.37471	7.7837	15.1449	9.92179	FPS		GO:0008299,GO:0004337,GO:0045337,GO:0033384,GO:0004161	isoprenoid biosynthetic process|geranyltranstransferase activity|farnesyl diphosphate biosynthetic process|geranyl diphosphate biosynthetic process|dimethylallyltranstransferase activity	ko00900	Terpenoid backbone biosynthesis
1340	TraesCS1D02G079600	589.078	222.21	955.947	4.30201	2.10501	0.0175539	0.131709	Up	10.3448	7.38977	5.41509	45.1031	37.3293	21.563	Os05g0134200		GO:0046872,GO:0003824,GO:0004722,GO:0043169,GO:0006470	metal ion binding|catalytic activity|protein serine/threonine phosphatase activity|cation binding|protein dephosphorylation
1341	TraesCS3D02G230300	53.9683	20.3567	87.5798	4.30225	2.10509	0.0325123	0.195682	Up	0.616445	0.366591	0.443685	2.8306	1.64714	1.41143	Os01g0618500		GO:0003676,GO:0005524,GO:0004386	nucleic acid binding|ATP binding|helicase activity
1342	TraesCS5A02G058100	308.767	116.392	501.141	4.30561	2.10622	0.0293425	0.183867	Up	5.08313	3.4312	4.22782	17.638	17.2071	7.40978	PK		GO:0008478,GO:0009443,GO:0016301,GO:0016310	pyridoxal kinase activity|pyridoxal 5'-phosphate salvage|kinase activity|phosphorylation	ko00750	Vitamin B6 metabolism
1343	TraesCS6D02G307600	75.407	28.419	122.395	4.30681	2.10662	0.00277802	0.0375425	Up	1.51253	1.66363	2.88393	5.07032	9.89349	15.7437	SAUR32		GO:0009733	response to auxin	ko04075	Plant hormone signal transduction
1344	TraesCS1B02G447400	34.2481	12.9052	55.5909	4.30765	2.1069	0.018757	0.137428	Up	0.0939188	0.124399	0.159205	0.43969	0.497443	0.405666	PIK6-NP		GO:0043531	ADP binding
1345	TraesCS1A02G082200	196.372	73.9786	318.765	4.30888	2.10731	0.0114143	0.0987704	Up	8.60297	4.36138	2.90776	22.7203	27.0962	14.2485	DHNAT1
1346	TraesCS7D02G120500	545.116	205.212	885.02	4.31272	2.1086	0.00555168	0.0607297	Up	7.60051	5.88852	13.5491	31.5083	34.9902	34.5459	MADS1	MIKC-type MADS-box transcription factor WM20 [Source:UniProtKB/TrEMBL;Acc:A9J1Z7]	GO:0003700,GO:0006351,GO:0005634,GO:0003677,GO:0006355,GO:0046983,GO:0045944,GO:0000977	DNA-binding transcription factor activity|transcription, DNA-templated|nucleus|DNA binding|regulation of transcription, DNA-templated|protein dimerization activity|positive regulation of transcription by RNA polymerase II|RNA polymerase II regulatory region sequence-specific DNA binding
1347	TraesCS4B02G043400	398.225	149.872	646.579	4.3142	2.10909	0.00953493	0.0874616	Up	5.10469	4.52777	4.69477	17.857	23.9075	13.4499	Os03g0708100		GO:0005886,GO:0048244	plasma membrane|phytanoyl-CoA dioxygenase activity	ko04146	Peroxisome
1348	TraesCS2A02G156700	316.983	119.289	514.676	4.31451	2.1092	0.00409716	0.0490576	Up	5.31774	5.56107	4.11282	22.6493	25.6188	28.1313
1349	TraesCS7B02G316400	109.327	41.1312	177.523	4.31601	2.1097	0.0177731	0.132781	Up	2.35691	0.729151	1.72129	6.60602	7.233	3.33437	CNR13		GO:0007166	cell surface receptor signaling pathway
1350	TraesCS2B02G001600	44.6967	16.815	72.5783	4.31627	2.10978	0.00531729	0.0589523	Up	0	0.326517	0.565046	0.375862	1.48447	2.04093	XA21		GO:0016021,GO:0005524,GO:0004672,GO:0004674,GO:0006468,GO:0005515	integral component of membrane|ATP binding|protein kinase activity|protein serine/threonine kinase activity|protein phosphorylation|protein binding
1351	TraesCS7B02G254400	946.81	356.094	1537.53	4.31776	2.11028	0.00990148	0.0895493	Up	10.5684	8.22444	12.0561	50.393	44.9278	28.154	RPT6A		GO:0005737,GO:0005524,GO:0016787,GO:0030163,GO:0000166	cytoplasm|ATP binding|hydrolase activity|protein catabolic process|nucleotide binding	ko03050	Proteasome
1352	TraesCS6D02G129600	24.7401	9.30318	40.177	4.31863	2.11057	0.0235499	0.159812	Up	0.567179	0.197507	0.233551	0.677039	2.52213	1.38855
1353	TraesCS2A02G295800	170.1	63.946	276.254	4.32012	2.11107	0.0137092	0.111736	Up	2.08002	1.75451	1.99014	8.07065	10.0182	4.4058	ELM1
1354	TraesCS3D02G118100	14.6993	5.52411	23.8745	4.32188	2.11166	0.0432614	0.234226	Up	0.169855	0.161288	0.208083	1.18631	0.913502	1.26369	WRKY13		GO:0003700,GO:0043565,GO:0006355	DNA-binding transcription factor activity|sequence-specific DNA binding|regulation of transcription, DNA-templated
1355	TraesCS6A02G283100	56.7755	21.3324	92.2186	4.32294	2.11201	0.0106034	0.0940085	Up	1.05186	0.272676	1.19036	3.45679	4.47514	4.24018
1356	TraesCS1B02G119100	340.647	127.967	553.327	4.32399	2.11236	0.00818817	0.0788717	Up	2.66548	4.00183	5.04068	14.1153	22.618	10.9406	Os05g0150500		GO:0005515	protein binding	ko04075	Plant hormone signal transduction
1357	TraesCS6A02G349300	90.7374	34.0807	147.394	4.32485	2.11265	0.0266555	0.173458	Up	1.84296	1.25667	1.02721	6.11236	7.29342	2.24532			GO:0016021	integral component of membrane
1358	TraesCS2B02G148600	541.629	203.407	879.852	4.32558	2.11289	0.0102782	0.0918849	Up	5.23235	4.1242	5.2239	26.1486	18.795	13.9769	ATG16		GO:0005515	protein binding
1359	TraesCS5A02G431700	235.729	88.5195	382.939	4.32604	2.11305	0.0120907	0.102661	Up	3.90232	2.00916	3.08953	16.5201	12.8897	8.48948
1360	TraesCS2A02G428400	64.8435	24.3459	105.341	4.32686	2.11332	0.0204862	0.145479	Up	0.876117	0.500239	0.576819	2.2122	2.7475	1.12596	2021-10-07		GO:0016021,GO:0022857,GO:0055085,GO:0005215	integral component of membrane|transmembrane transporter activity|transmembrane transport|transporter activity
1361	TraesCS7B02G028100	24.1001	9.04658	39.1537	4.32801	2.1137	0.0274472	0.176439	Up	0.207688	0.67724	0.214517	2.3052	1.69089	2.14419
1362	TraesCS6B02G217300	104.497	39.2083	169.785	4.33033	2.11448	0.0266772	0.173535	Up	1.6186	1.20694	0.51492	7.15549	5.3794	3.16806	CYP711A1		GO:0016021,GO:0020037,GO:0004497,GO:0005506,GO:0016705,GO:0055114	integral component of membrane|heme binding|monooxygenase activity|iron ion binding|oxidoreductase activity, acting on paired donors, with incorporation or reduction of molecular oxygen|oxidation-reduction process
1363	TraesCSU02G113900	207.892	77.9915	337.792	4.33114	2.11475	0.00327118	0.042107	Up	13.2309	4.35572	12.3062	39.1252	55.4202	70.9786	LSU1		GO:0098869	cellular oxidant detoxification
1364	TraesCS5B02G006400	288.041	108.048	468.033	4.33172	2.11494	0.00982554	0.0890536	Up	3.39742	1.36997	2.19827	8.78909	13.9312	6.39314	BLH7		GO:0003677,GO:0006355	DNA binding|regulation of transcription, DNA-templated
1365	TraesCS4D02G231200	85.7067	32.1474	139.266	4.3321	2.11507	0.0264459	0.172659	Up	0.773721	0.863782	0.608212	4.50567	4.41013	1.75857	Os01g0765400		GO:0005615	extracellular space
1366	TraesCS1D02G267400	454.045	170.278	737.812	4.33297	2.11536	0.0195387	0.141039	Up	4.91674	4.61126	3.76449	19.1791	19.4407	9.60864	sap49		GO:0003676,GO:0003723	nucleic acid binding|RNA binding	ko03040	Spliceosome
1367	TraesCS5B02G190600	524.709	196.626	852.793	4.33714	2.11674	0.00722163	0.0725582	Up	6.42898	5.0882	5.50234	27.7169	25.409	20.3875
1368	TraesCS2B02G318100	243.928	91.4056	396.45	4.33726	2.11678	0.0340376	0.201323	Up	3.12835	0.950841	0.929431	7.85488	10.5194	3.3297	CSLH1		GO:0016021,GO:0016020,GO:0016760,GO:0030244,GO:0071555	integral component of membrane|membrane|cellulose synthase (UDP-forming) activity|cellulose biosynthetic process|cell wall organization
1369	TraesCS1D02G079100	192.231	72.0259	312.436	4.33783	2.11697	0.0119811	0.102043	Up	2.65931	1.96696	2.06521	9.59596	11.4161	5.39891			GO:0006355,GO:0007623	regulation of transcription, DNA-templated|circadian rhythm
1370	TraesCS2A02G259400	578.519	216.742	940.295	4.33831	2.11713	0.028973	0.182421	Up	3.45247	3.0191	4.98652	19.2869	15.9585	8.55054			GO:0005515,GO:0008017,GO:0000226,GO:0004674,GO:0099738,GO:0046777,GO:0009819,GO:0045926	protein binding|microtubule binding|microtubule cytoskeleton organization|protein serine/threonine kinase activity|cell cortex region|protein autophosphorylation|drought recovery|negative regulation of growth
1371	TraesCS4B02G060300	117.3	43.938	190.663	4.33936	2.11748	0.0209105	0.147242	Up	1.00754	0.834689	0.88708	5.08464	4.3722	2.24689
1372	TraesCS5D02G198100	646.022	241.973	1050.07	4.33962	2.11757	0.00624978	0.0658632	Up	5.75326	4.84035	4.94106	23.7164	21.0209	20.8777			GO:0016021	integral component of membrane
1373	TraesCS5D02G062900	443.969	166.178	721.761	4.34331	2.1188	0.00459052	0.0531995	Up	16.4915	7.21718	8.61622	32.1799	38.7094	47.5508			GO:0005737,GO:0003824,GO:0009072,GO:0005515	cytoplasm|catalytic activity|aromatic amino acid family metabolic process|protein binding	ko00350,ko00643	Tyrosine metabolism|Styrene degradation
1374	TraesCS4A02G393600	207.192	77.5346	336.85	4.34451	2.1192	0.00914904	0.0851377	Up	7.2718	1.57965	1.83496	12.4055	12.4617	10.6846	Os08g0433100		GO:0016021	integral component of membrane
1375	TraesCS1B02G294500	9.32893	3.4908	15.1671	4.34487	2.11931	0.043725	0.235779	Up	0.467089	0.349999	0.174388	0.747199	0	1.69175	H2B.11		GO:0003677,GO:0000786,GO:0046982	DNA binding|nucleosome|protein heterodimerization activity
1376	TraesCS5A02G104200	244.867	91.6131	398.122	4.34568	2.11958	0.0114915	0.0992526	Up	2.59881	2.12376	3.54116	11.5085	14.4542	6.3246	UPS2		GO:0016021,GO:0022857,GO:0071705	integral component of membrane|transmembrane transporter activity|nitrogen compound transport
1377	TraesCS3A02G346900	897.27	335.647	1458.89	4.34651	2.11986	0.00765725	0.0753339	Up	5.29463	4.59274	35.7104	75.5183	112.6	45.7363	SEN102		GO:0008234,GO:0006508	cysteine-type peptidase activity|proteolysis
1378	TraesCS3A02G484400	160.89	60.1789	261.602	4.34707	2.12004	0.00666416	0.0688	Up	3.56754	2.78588	1.01239	6.90286	10.0857	9.55799	ANN5		GO:0005509,GO:0005544	calcium ion binding|calcium-dependent phospholipid binding
1379	TraesCSU02G104900	24.7901	9.27113	40.309	4.3478	2.12029	0.0408184	0.225837	Up	0.16473	0.19898	0.122316	0.982815	0.332915	0.543504
1380	TraesCS5D02G081800	756.145	282.731	1229.56	4.34886	2.12064	0.00833573	0.0798132	Up	6.08692	3.13061	4.75577	21.3091	23.3357	15.1951	At4g33300		GO:0043531	ADP binding
1381	TraesCS2B02G312100	230.267	86.0443	374.49	4.3523	2.12178	0.0262974	0.172092	Up	2.30143	1.69958	1.96565	8.07903	9.02562	3.54719	ELM1
1382	TraesCS6A02G138500	201.142	75.1422	327.141	4.35363	2.12222	0.0113422	0.0983908	Up	2.75485	2.5253	3.69019	13.1664	13.3138	7.52852	otu1		GO:0004843,GO:0016579,GO:0005829,GO:0030433,GO:1904265	thiol-dependent ubiquitin-specific protease activity|protein deubiquitination|cytosol|ubiquitin-dependent ERAD pathway|GO_1904265	ko04141	Protein processing in endoplasmic reticulum
1383	TraesCS2A02G219000	1103.29	412.053	1794.53	4.35509	2.1227	0.00499788	0.0565365	Up	15.4824	10.4739	19.8493	65.6844	77.7791	65.2698	TIF	Translation initiation factor [Source:UniProtKB/TrEMBL;Acc:Q8LRM9]	GO:0003743,GO:0006413	translation initiation factor activity|translational initiation	ko03013	RNA transport
1384	TraesCS2A02G273100	2312.49	863.374	3761.61	4.35687	2.12329	0.00585059	0.0628824	Up	43.0279	33.6921	37.6432	171.966	189.82	144.513	CCP1		GO:0008234,GO:0006508,GO:0016787,GO:0008233	cysteine-type peptidase activity|proteolysis|hydrolase activity|peptidase activity	ko04142,ko04210	Lysosome|Apoptosis
1385	TraesCS7B02G319900	792.434	295.781	1289.09	4.35825	2.12375	0.0101472	0.091109	Up	5.87271	5.76996	8.01815	27.5514	33.186	14.6891	USP		GO:0070569	uridylyltransferase activity	ko00040,ko00520,ko00053,ko00052	Pentose and glucuronate interconversions|Amino sugar and nucleotide sugar metabolism|Ascorbate and aldarate metabolism|Galactose metabolism
1386	TraesCS4D02G039500	821.393	306.582	1336.2	4.35839	2.12379	0.017097	0.129371	Up	5.74983	4.6966	4.80017	25.3766	23.1282	11.9974	ORP1C
1387	TraesCS3D02G219400	18.3619	6.85194	29.8719	4.35963	2.12421	0.0225547	0.155175	Up	0.539686	0.105186	0.240667	0.695721	2.13435	1.80182
1388	TraesCS6D02G006600	674.266	251.605	1096.93	4.35971	2.12423	0.017571	0.131785	Up	17.9524	9.43503	6.29345	56.5522	57.1216	24.8257	PIA1		GO:0005515	protein binding
1389	TraesCS1B02G089000	96.5682	36.0346	157.102	4.35974	2.12424	0.0102895	0.0919579	Up	0.12493	1.50185	2.3415	6.80248	7.62673	4.53407	naat-A		GO:0030170,GO:0003824,GO:0006520,GO:0009058,GO:0008483	pyridoxal phosphate binding|catalytic activity|cellular amino acid metabolic process|biosynthetic process|transaminase activity	ko00400,ko00130,ko00950,ko00350,ko01230,ko00401,ko00960,ko00270,ko00360	Phenylalanine, tyrosine and tryptophan biosynthesis|Ubiquinone and other terpenoid-quinone biosynthesis|Isoquinoline alkaloid biosynthesis|Tyrosine metabolism|Biosynthesis of amino acids|Novobiocin biosynthesis|Tropane, piperidine and pyridine alkaloid biosynthesis|Cysteine and methionine metabolism|Phenylalanine metabolism
1390	TraesCS4A02G442900	588.027	219.282	956.773	4.3632	2.12539	0.00880502	0.0829287	Up	14.1303	9.76668	13.0676	54.9518	53.4739	33.7918	PEX11-5		GO:0005779,GO:0016559	integral component of peroxisomal membrane|peroxisome fission
1391	TraesCS7D02G374400	219.405	81.8156	356.994	4.3634	2.12545	0.012308	0.103867	Up	2.19731	1.38768	1.70715	7.72228	9.50855	4.42987	CIPK24	Non-specific serine/threonine protein kinase [Source:UniProtKB/TrEMBL;Acc:W5I165]	GO:0005524,GO:0004672,GO:0004674,GO:0007165,GO:0009651,GO:0009705,GO:0006468	ATP binding|protein kinase activity|protein serine/threonine kinase activity|signal transduction|response to salt stress|plant-type vacuole membrane|protein phosphorylation
1392	TraesCS2D02G360900	17.6222	6.56951	28.6749	4.36485	2.12593	0.0210077	0.14768	Up	0.378664	0.492994	0.1271	1.429	1.97562	2.36371	TCEA2		GO:0016787	hydrolase activity
1393	TraesCS7B02G327400	141.157	52.6157	229.698	4.36559	2.12618	0.00672968	0.0692102	Up	1.49567	0.611742	2.90903	5.08301	10.7591	6.5857	XTH22	Xyloglucan endotransglucosylase/hydrolase [Source:UniProtKB/TrEMBL;Acc:A0A1D6C2S1]	GO:0004553,GO:0005975,GO:0005618,GO:0010411,GO:0016762,GO:0042546,GO:0048046,GO:0042545,GO:0006073,GO:0080022	hydrolase activity, hydrolyzing O-glycosyl compounds|carbohydrate metabolic process|cell wall|xyloglucan metabolic process|xyloglucan:xyloglucosyl transferase activity|cell wall biogenesis|apoplast|cell wall modification|cellular glucan metabolic process|primary root development
1394	TraesCS7A02G030900	682.7	254.279	1111.12	4.36968	2.12753	0.0131182	0.108253	Up	7.59671	7.57714	6.67554	33.9218	35.7926	17.0991	BPA1		GO:0003676,GO:0003723	nucleic acid binding|RNA binding
1395	TraesCS3D02G036900	301.712	112.352	491.072	4.37083	2.12791	0.00349033	0.0439818	Up	4.63482	3.51974	5.06667	12.8122	25.4852	21.5665	ENDO2		GO:0003676,GO:0016788,GO:0004519,GO:0006308	nucleic acid binding|hydrolase activity, acting on ester bonds|endonuclease activity|DNA catabolic process
1396	TraesCS1D02G227700	138.531	51.572	225.49	4.37233	2.1284	0.0120238	0.102268	Up	1.21165	1.61963	1.83982	7.48241	5.12751	4.61081	NDT1		GO:0016021,GO:0022857,GO:0055085,GO:0005739,GO:0051724,GO:0031969	integral component of membrane|transmembrane transporter activity|transmembrane transport|mitochondrion|NAD transmembrane transporter activity|chloroplast membrane
1397	TraesCS6B02G288500	91.0539	33.8882	148.219	4.37377	2.12888	0.0163249	0.125389	Up	1.3175	0.694785	0.672839	3.56178	5.29808	2.17622	RVE1	MYB-related protein [Source:UniProtKB/TrEMBL;Acc:G9DRA4]	GO:0005634,GO:0003677	nucleus|DNA binding
1398	TraesCS2B02G106400	260.677	97.0009	424.353	4.37473	2.12919	0.00966112	0.0881466	Up	2.81234	4.17926	5.83558	24.9927	28.2116	14.2669	TS2
1399	TraesCS4D02G093300	253.671	94.3917	412.951	4.37486	2.12924	0.00966865	0.0881848	Up	7.00752	3.75205	4.00472	24.6907	23.5762	15.7491	NIFU2		GO:0005506,GO:0051536,GO:0016226	iron ion binding|iron-sulfur cluster binding|iron-sulfur cluster assembly
1400	TraesCS5A02G111900	131.033	48.7571	213.308	4.37492	2.12926	0.0110908	0.0969656	Up	1.313	1.1931	1.14077	4.94552	7.11316	3.62811	OFUT9		GO:0016021,GO:0016757,GO:0006004	integral component of membrane|transferase activity, transferring glycosyl groups|fucose metabolic process
1401	TraesCS6B02G305300	172.895	64.3212	281.469	4.37599	2.12961	0.00406817	0.0487979	Up	3.10249	3.26937	2.11452	10.5124	13.4062	15.329
1402	TraesCS2D02G408700	418.41	155.645	681.174	4.37646	2.12976	0.00650664	0.0677061	Up	4.95331	5.434	2.63087	21.1225	22.1004	17.0585	At3g47420		GO:0016021,GO:0022857,GO:0055085,GO:0016020,GO:0005887	integral component of membrane|transmembrane transporter activity|transmembrane transport|membrane|integral component of plasma membrane
1403	TraesCS3A02G530200	111.206	41.3547	181.058	4.37818	2.13033	0.0155803	0.121454	Up	1.27478	0.967473	1.0418	6.74926	6.5242	2.82398	RLCK176		GO:0005524,GO:0004672,GO:0004674,GO:0006468	ATP binding|protein kinase activity|protein serine/threonine kinase activity|protein phosphorylation
1404	TraesCS7D02G352700	127.009	47.2231	206.795	4.37911	2.13064	0.00763644	0.0751754	Up	1.67951	1.14351	2.02757	7.53012	10.4201	7.15443	UGT75L6		GO:0016758	transferase activity, transferring hexosyl groups
1405	TraesCS2A02G276000	52.3527	19.4533	85.2521	4.3824	2.13172	0.00829298	0.0795751	Up	0.282201	0.522707	0.903565	2.47787	3.30136	2.89066	EXO70H1	Exocyst subunit Exo70 family protein [Source:UniProtKB/TrEMBL;Acc:A0A1D5TI20]	GO:0015031,GO:0000145,GO:0006887	protein transport|exocyst|exocytosis
1406	TraesCS1D02G250900	380.884	141.523	620.244	4.38264	2.1318	0.0350376	0.205115	Up	2.55925	2.25803	3.30681	11.0159	21.1381	5.75007	ALKBH10B		GO:0016491,GO:0055114	oxidoreductase activity|oxidation-reduction process
1407	TraesCS6A02G133700	163.27	60.6495	265.891	4.38406	2.13227	0.0133268	0.109444	Up	2.65895	2.17597	1.56821	12.1707	12.7805	5.68472	At3g26922		GO:0005515	protein binding
1408	TraesCS7A02G424800	373.768	138.819	608.717	4.38496	2.13256	0.0120525	0.102442	Up	9.75396	2.91122	0.934673	26.0113	24.529	13.4923
1409	TraesCS7A02G125600	34.3729	12.7649	55.981	4.38556	2.13276	0.027031	0.174632	Up	0.407953	0.446456	0.192457	1.38094	1.97859	0.865824	HEMA3	Glutamyl-tRNA reductase [Source:UniProtKB/TrEMBL;Acc:A0A1D6BWY3]	GO:0055114,GO:0050661,GO:0008883,GO:0033014,GO:0006782	oxidation-reduction process|NADP binding|glutamyl-tRNA reductase activity|tetrapyrrole biosynthetic process|protoporphyrinogen IX biosynthetic process	ko00860	Porphyrin and chlorophyll metabolism
1410	TraesCS7A02G385100	80.6811	29.9607	131.401	4.3858	2.13284	0.0435198	0.235165	Up	1.90848	1.71049	2.22999	11.4259	13.0541	3.64996	FLZ2
1411	TraesCS7B02G332300	546.445	202.833	890.057	4.38812	2.1336	0.02308	0.157611	Up	5.23504	4.49854	3.97527	25.0619	18.2674	13.2133	REIL1		GO:0003676,GO:0008270	nucleic acid binding|zinc ion binding
1412	TraesCS1B02G244300	57.7391	21.428	94.0502	4.38913	2.13394	0.0139878	0.113243	Up	1.70681	0.987345	1.10115	6.03327	10.1981	5.23773	EID1		GO:0005515	protein binding
1413	TraesCS7A02G395700	13.6928	5.08034	22.3053	4.39051	2.13439	0.0353156	0.206178	Up	0.10564	0.209801	0.214061	0.860324	1.43478	1.24845	CCR1		GO:0003824,GO:0050662	catalytic activity|coenzyme binding
1414	TraesCS3A02G122400	728.145	270.076	1186.21	4.39215	2.13493	0.0069378	0.0706777	Up	6.61	5.31951	7.89884	28.8083	32.1671	21.8383	ISS1		GO:0030170,GO:0003824,GO:0009058,GO:0006570,GO:0005829,GO:0006555,GO:1901997,GO:0009698,GO:0006569,GO:0006558,GO:0010326,GO:0009851,GO:0010366,GO:0009641,GO:0010252	pyridoxal phosphate binding|catalytic activity|biosynthetic process|tyrosine metabolic process|cytosol|methionine metabolic process|negative regulation of indoleacetic acid biosynthetic process via tryptophan|phenylpropanoid metabolic process|tryptophan catabolic process|L-phenylalanine metabolic process|methionine-oxo-acid transaminase activity|auxin biosynthetic process|negative regulation of e…
1415	TraesCS3A02G463400	295.355	109.5	481.21	4.39459	2.13573	0.0451053	0.240407	Up	3.39689	2.61776	1.83609	14.5934	10.887	5.66876	RLCK185		GO:0005524,GO:0004672,GO:0004674,GO:0006468	ATP binding|protein kinase activity|protein serine/threonine kinase activity|protein phosphorylation
1416	TraesCS4A02G127000	228.696	84.7682	372.623	4.39579	2.13612	0.0136238	0.111199	Up	2.95815	1.09724	1.26923	7.42125	9.09842	4.00111	ASD1		GO:0016021,GO:0046373,GO:0046556	integral component of membrane|L-arabinose metabolic process|alpha-L-arabinofuranosidase activity	ko00520	Amino sugar and nucleotide sugar metabolism
1417	TraesCS4B02G306900	104.129	38.5947	169.663	4.39602	2.1362	0.011767	0.100788	Up	1.81322	1.87823	2.33512	8.96982	11.572	5.76106	RABH1E		GO:0005525,GO:0003924	GTP binding|GTPase activity
1418	TraesCS2B02G431000	48.4974	17.9635	79.0313	4.39954	2.13735	0.0210192	0.147725	Up	0.866236	0.820873	0.390459	7.38972	7.34382	2.94114	SCPL18		GO:0004185,GO:0006508	serine-type carboxypeptidase activity|proteolysis
1419	TraesCS6A02G386700	106.455	39.4212	173.489	4.4009	2.1378	0.0164965	0.126307	Up	1.23889	0.762682	1.68484	7.26758	6.19183	3.49406	dph1	2-(3-amino-3-carboxypropyl)histidine synthase subunit 1 [Source:UniProtKB/TrEMBL;Acc:A0A1D6AAH0]	GO:0016740,GO:0017183	transferase activity|peptidyl-diphthamide biosynthetic process from peptidyl-histidine
1420	TraesCS4D02G228100	538.14	199.276	877.005	4.40096	2.13782	0.0174545	0.131199	Up	5.66019	5.08185	5.88202	26.1524	32.5791	11.4717	ADF5		GO:0005622,GO:0003779,GO:0015629,GO:0030042	intracellular|actin binding|actin cytoskeleton|actin filament depolymerization	ko04810	Regulation of actin cytoskeleton
1421	TraesCS1A02G019000	973.038	360.228	1585.85	4.40234	2.13827	0.00653035	0.0678822	Up	19.7439	26.1055	24.812	126.333	99.4534	84.6955	VATP-P1	V-type proton ATPase proteolipid subunit [Source:UniProtKB/TrEMBL;Acc:A0A1D5T1X1]	GO:0016021,GO:0015991,GO:0015078,GO:0005774,GO:0033179,GO:0016020,GO:0006811,GO:0033177,GO:1902600,GO:0005773	integral component of membrane|GO_0015991|proton transmembrane transporter activity|vacuolar membrane|proton-transporting V-type ATPase, V0 domain|membrane|ion transport|proton-transporting two-sector ATPase complex, proton-transporting domain|proton transmembrane transport|vacuole	ko04145,ko00190,ko04142	Phagosome|Oxidative phosphorylation|Lysosome
1422	TraesCS6A02G311400	46.9963	17.398	76.5947	4.4025	2.13832	0.0107562	0.094953	Up	0.39141	0.381313	0.606646	1.69913	1.9194	1.98912	CDC48		GO:0005524	ATP binding
1423	TraesCS2D02G162500	232.768	86.1636	379.372	4.40292	2.13846	0.0051717	0.0578271	Up	6.04412	5.97097	4.72387	27.4474	34.0906	28.2534
1424	TraesCS6B02G209400	102.733	38.0093	167.457	4.40568	2.13936	0.0152718	0.119875	Up	0.728054	0.332637	0.497333	2.27597	2.4762	1.33961	At1g59620		GO:0043531	ADP binding
1425	TraesCS7D02G390900	187.689	69.4315	305.947	4.40646	2.13962	0.0103402	0.0922466	Up	2.52765	1.81415	3.09727	11.9278	10.5474	6.91493	At1g65240		GO:0004190,GO:0006508	aspartic-type endopeptidase activity|proteolysis
1426	TraesCS5A02G133200	478.533	177.013	780.053	4.40675	2.13972	0.0088089	0.082936	Up	3.53634	2.33665	4.14194	10.6848	15.8671	7.94134	LACS6		GO:0003824	catalytic activity	ko00071,ko00061,ko04146,ko02024,ko01212	Fatty acid degradation|Fatty acid biosynthesis|Peroxisome|Quorum sensing|Fatty acid metabolism
1427	TraesCS6D02G154400	50.2355	18.5813	81.8897	4.4071	2.13983	0.0113281	0.0983065	Up	0.34851	0.458031	0.430522	2.09987	2.3229	1.72579	TGA10		GO:0003700,GO:0006351,GO:0043565,GO:0006355	DNA-binding transcription factor activity|transcription, DNA-templated|sequence-specific DNA binding|regulation of transcription, DNA-templated	ko04075	Plant hormone signal transduction
1428	TraesCS7D02G055500	275.737	101.988	449.486	4.40725	2.13988	0.0479166	0.249303	Up	3.85666	3.99628	3.80494	26.0398	25.5524	7.93096	XBOS36		GO:0005515	protein binding
1429	TraesCS2B02G167700	40.2016	14.8672	65.536	4.40808	2.14015	0.0197932	0.142222	Up	0.553571	0.194563	0.28038	0.775259	1.98787	0.860441		Sulfotransferase [Source:UniProtKB/TrEMBL;Acc:A0A341QKC4]	GO:0008146,GO:0016021	sulfotransferase activity|integral component of membrane
1430	TraesCS3D02G366700	204.198	75.5078	332.889	4.40867	2.14034	0.00539982	0.0595377	Up	1.0687	0.586086	0.835458	3.62096	2.88749	3.70078	At2g27500		GO:0004553,GO:0005975	hydrolase activity, hydrolyzing O-glycosyl compounds|carbohydrate metabolic process
1431	TraesCS2D02G556600	23.2043	8.57558	37.833	4.41171	2.14134	0.0342886	0.202225	Up	0	0.187466	0.564944	1.54753	1.35787	0.63727	AAE5		GO:0003824	catalytic activity
1432	TraesCS2B02G480200	203.82	75.2547	332.385	4.4168	2.143	0.00984307	0.0891318	Up	1.48895	1.15371	2.33892	6.78405	8.95463	4.8143	D2HGDH		GO:0016491,GO:0003824,GO:0071949,GO:0055114,GO:0050660	oxidoreductase activity|catalytic activity|FAD binding|oxidation-reduction process|flavin adenine dinucleotide binding
1433	TraesCS3D02G237900	1210.61	446.944	1974.27	4.41726	2.14315	0.0123559	0.104096	Up	10.1521	9.11323	7.79409	40.2736	42.5175	20.1776	LACS4		GO:0003824	catalytic activity	ko00071,ko00061,ko04146,ko02024,ko01212	Fatty acid degradation|Fatty acid biosynthesis|Peroxisome|Quorum sensing|Fatty acid metabolism
1434	TraesCS1D02G253700	1486.93	548.635	2425.22	4.42045	2.14419	0.0420814	0.230413	Up	11.6881	7.71379	4.73846	40.3676	36.3164	15.5519	ATG18G		GO:0005515	protein binding
1435	TraesCS4A02G182000	114.673	42.2801	187.066	4.42445	2.1455	0.0113003	0.0981661	Up	4.36769	3.35732	3.55606	19.7875	20.8042	13.0062
1436	TraesCS3D02G360100	267	98.4339	435.567	4.42497	2.14567	0.0101875	0.0913332	Up	2.19843	2.66074	2.34692	10.6562	9.28792	6.28567	PECT1		GO:0003824,GO:0009058	catalytic activity|biosynthetic process	ko00564,ko00440	Glycerophospholipid metabolism|Phosphonate and phosphinate metabolism
1437	TraesCSU02G002600	134.324	49.506	219.143	4.42659	2.1462	0.00988519	0.0894424	Up	0.101516	0.870912	1.36435	3.126	4.68819	2.19718	LOS1		GO:0005525,GO:0003924	GTP binding|GTPase activity	ko04152	AMPK signaling pathway
1438	TraesCS3D02G529700	44.6221	16.4427	72.8016	4.4276	2.14653	0.0354868	0.206735	Up	0.670599	0.527224	0.505049	3.22808	3.43283	1.11174
1439	TraesCS2B02G372900	15371.7	5664.26	25079.2	4.42762	2.14653	0.005434	0.0597957	Up	288.875	239.729	269.098	1310.66	1377.4	1069.63	SAMDC	S-adenosylmethionine decarboxylase proenzyme [Source:UniProtKB/TrEMBL;Acc:W5BFX0]	GO:0008295,GO:0004014,GO:0006597,GO:0006557	spermidine biosynthetic process|adenosylmethionine decarboxylase activity|spermine biosynthetic process|S-adenosylmethioninamine biosynthetic process	ko00330,ko00270	Arginine and proline metabolism|Cysteine and methionine metabolism
1440	TraesCS4A02G159700	795.998	293.291	1298.7	4.42804	2.14667	0.0123931	0.104298	Up	7.49911	7.15918	11.2408	41.584	38.3792	20.7478	CGS1		GO:0030170,GO:0003824	pyridoxal phosphate binding|catalytic activity	ko01230,ko00920,ko00270,ko00450	Biosynthesis of amino acids|Sulfur metabolism|Cysteine and methionine metabolism|Selenocompound metabolism
1441	TraesCS6D02G297600	133.108	49.0198	217.196	4.43078	2.14756	0.00544977	0.0599317	Up	0.738234	0.821507	1.18374	2.45954	5.9023	3.60852	QUA2		GO:0008168	methyltransferase activity
1442	TraesCS5B02G381900	29.7846	10.9678	48.6013	4.43127	2.14772	0.0213161	0.149164	Up	0.745627	0.706094	0.216877	3.0807	2.39614	1.9584	IAA30	Auxin-responsive protein [Source:UniProtKB/TrEMBL;Acc:W5FJU4]	GO:0006351,GO:0005634,GO:0006355,GO:0009734,GO:0005515	transcription, DNA-templated|nucleus|regulation of transcription, DNA-templated|auxin-activated signaling pathway|protein binding	ko04075	Plant hormone signal transduction
1443	TraesCS7B02G347000	437.493	161.085	713.901	4.43183	2.1479	0.0139718	0.113198	Up	2.82837	1.94423	1.91166	11.1017	9.17204	5.62927	SYT3		GO:0016021,GO:0008289,GO:0006869	integral component of membrane|lipid binding|lipid transport
1444	TraesCS7D02G271500	156.032	57.4454	254.618	4.43234	2.14807	0.00580988	0.0625438	Up	2.16578	2.71645	4.26861	17.5938	16.6708	15.2169	CXE8		GO:0016787	hydrolase activity
1445	TraesCS3B02G462700	316.782	116.623	516.942	4.4326	2.14815	0.00492522	0.0560245	Up	3.77494	2.73598	4.43195	18.524	21.4962	17.6476			GO:0016021,GO:0016020	integral component of membrane|membrane
1446	TraesCS2D02G601400	605.856	222.931	988.781	4.43537	2.14905	0.00674607	0.0692796	Up	7.42374	6.21693	4.46982	26.1553	28.9933	21.0208	ATG4B	Cysteine protease [Source:UniProtKB/TrEMBL;Acc:U3Q008]	GO:0006914,GO:0005737,GO:0008234,GO:0015031,GO:0006508,GO:0016787,GO:0008233	autophagy|cytoplasm|cysteine-type peptidase activity|protein transport|proteolysis|hydrolase activity|peptidase activity	ko04140	Regulation of autophagy
1447	TraesCS1D02G190000	63.5502	23.3839	103.716	4.43537	2.14905	0.0149157	0.118027	Up	1.82408	2.33001	0.723279	4.86229	14.8761	5.91638	GSTU6	Glutathione transferase 2 [Source:UniProtKB/TrEMBL;Acc:I7FHT3]	GO:0016740,GO:0005515	transferase activity|protein binding	ko00982,ko00480,ko00980	Drug metabolism - cytochrome P450|Glutathione metabolism|Metabolism of xenobiotics by cytochrome P450
1448	TraesCS3D02G229500	58.1346	21.3884	94.8808	4.43609	2.14929	0.0105311	0.0935224	Up	1.58731	0.662651	0.622359	2.63946	6.93181	4.01557	At5g41800		GO:0016021	integral component of membrane
1449	TraesCS7A02G358500	1137.48	418.398	1856.56	4.4373	2.14968	0.0492398	0.253422	Up	2.90349	2.4613	3.49629	17.2664	10.794	7.73506	RSA1		GO:0006355,GO:0005509,GO:0005515	regulation of transcription, DNA-templated|calcium ion binding|protein binding
1450	TraesCS4A02G098900	54.1586	19.919	88.3982	4.43789	2.14987	0.0116746	0.100324	Up	1.59753	1.95929	0.62305	6.85288	8.1866	5.85856			GO:0016491,GO:0003955,GO:0010181	oxidoreductase activity|NAD(P)H dehydrogenase (quinone) activity|FMN binding	ko00130	Ubiquinone and other terpenoid-quinone biosynthesis
1451	TraesCS7A02G003100	698.611	256.933	1140.29	4.43808	2.14994	0.0401599	0.223771	Up	5.13706	3.22653	2.91425	17.8581	17.664	6.6076	ML2		GO:0003676,GO:0003723	nucleic acid binding|RNA binding
1452	TraesCS6D02G307100	42.5119	15.6306	69.3932	4.43958	2.15042	0.0134115	0.109948	Up	0.460955	0.29546	0.273544	1.34035	1.04908	1.22419	MEKK1		GO:0005524,GO:0004672,GO:0006468	ATP binding|protein kinase activity|protein phosphorylation
1453	TraesCS7A02G484300	86.9567	31.9568	141.957	4.44214	2.15125	0.010376	0.0925146	Up	0.690519	0.339882	0.705611	2.19679	3.22917	2.01531	RBK1		GO:0005524,GO:0004672,GO:0006468	ATP binding|protein kinase activity|protein phosphorylation
1454	TraesCS1D02G174800	123.079	45.2319	200.927	4.44214	2.15126	0.0110759	0.0969314	Up	2.71357	2.38911	1.74408	11.8222	9.09986	6.60047	SQS1		GO:0003676	nucleic acid binding
1455	TraesCS5B02G236400	252.486	92.7848	412.186	4.44239	2.15134	0.00912646	0.0849974	Up	3.77826	3.566	2.79849	18.1275	16.9336	10.4279	HSFB1		GO:0003700,GO:0043565,GO:0005634,GO:0006355,GO:0045892,GO:0009408,GO:0003677	DNA-binding transcription factor activity|sequence-specific DNA binding|nucleus|regulation of transcription, DNA-templated|negative regulation of transcription, DNA-templated|response to heat|DNA binding
1456	TraesCS5A02G325400	388.443	142.742	634.145	4.4426	2.1514	0.0275189	0.176772	Up	4.79881	3.27748	3.37348	21.9086	16.9824	10.0534	BBR
1457	TraesCS7A02G050100	57.8027	21.2375	94.3678	4.44345	2.15168	0.0178516	0.133107	Up	0.363195	0.279451	0.393566	1.63236	1.7081	1.00083	EDR2		GO:0008289	lipid binding
1458	TraesCS7A02G259000	79.3886	29.1637	129.613	4.44434	2.15197	0.00510515	0.0573063	Up	1.78891	0.372828	0.338668	1.80768	4.90967	4.76412	At3g26010		GO:0005515	protein binding
1459	TraesCS4A02G166700	177.58	65.21	289.951	4.44642	2.15264	0.00984071	0.0891318	Up	7.49244	2.85676	1.84057	20.6897	21.7069	14.0193
1460	TraesCS1D02G280200	347.105	127.45	566.759	4.4469	2.1528	0.0157665	0.122442	Up	6.24887	2.94587	2.84319	20.8392	21.6731	10.8895
1461	TraesCS5B02G077800	23.0222	8.4523	37.592	4.44755	2.15301	0.0306724	0.188836	Up	0.131167	0.180794	0.408703	1.40512	1.49093	0.948868	CYP81E8		GO:0016021,GO:0020037,GO:0004497,GO:0005506,GO:0016705,GO:0055114	integral component of membrane|heme binding|monooxygenase activity|iron ion binding|oxidoreductase activity, acting on paired donors, with incorporation or reduction of molecular oxygen|oxidation-reduction process
1462	TraesCS4A02G009400	250.755	92.0555	409.454	4.4479	2.15312	0.00849461	0.0808896	Up	1.56743	1.27109	1.33603	6.23263	9.0123	4.23865	Os03g0179900	Lipoxygenase [Source:UniProtKB/TrEMBL;Acc:A0A1D6RVN7]	GO:0046872,GO:0016491,GO:0016702,GO:0055114,GO:0031408,GO:0005515	metal ion binding|oxidoreductase activity|oxidoreductase activity, acting on single donors with incorporation of molecular oxygen, incorporation of two atoms of oxygen|oxidation-reduction process|oxylipin biosynthetic process|protein binding	ko00591,ko00592	Linoleic acid metabolism|alpha-Linolenic acid metabolism
1463	TraesCS1B02G128800	78.1411	28.6851	127.597	4.4482	2.15322	0.0136197	0.111186	Up	0.157658	1.08471	2.19317	5.82121	8.71598	3.10274	ZIP6		GO:0016021,GO:0030001,GO:0016020,GO:0055085,GO:0046873,GO:0005385,GO:0009624,GO:0071577	integral component of membrane|metal ion transport|membrane|transmembrane transport|metal ion transmembrane transporter activity|zinc ion transmembrane transporter activity|response to nematode|zinc ion transmembrane transport
1464	TraesCS1D02G162200	428.279	157.198	699.359	4.44891	2.15345	0.00968316	0.0882524	Up	3.42654	3.43343	4.0466	17.3165	18.9915	8.40755	Os10g0516300		GO:0005739,GO:0022900,GO:0006552,GO:0009646,GO:0004174	mitochondrion|electron transport chain|leucine catabolic process|response to absence of light|electron-transferring-flavoprotein dehydrogenase activity
1465	TraesCS2D02G549300	877.189	321.879	1432.5	4.45042	2.15394	0.00471974	0.054273	Up	5.08636	8.04304	11.7412	40.3603	36.9075	35.9583	PAO4		GO:0016491,GO:0055114,GO:0050660,GO:0052894,GO:0052901,GO:0046208,GO:1903602,GO:0005777	oxidoreductase activity|oxidation-reduction process|flavin adenine dinucleotide binding|norspermine:oxygen oxidoreductase activity|spermine:oxygen oxidoreductase (spermidine-forming) activity|spermine catabolic process|thermospermine catabolic process|peroxisome	ko00330,ko00410	Arginine and proline metabolism|beta-Alanine metabolism
1466	TraesCS2A02G437200	245.777	90.1562	401.398	4.45226	2.15454	0.0132462	0.109062	Up	4.96224	1.51358	1.11265	12.746	12.6478	6.22378	MBR2
1467	TraesCS4B02G038800	1693.8	621.243	2766.37	4.45296	2.15476	0.0173134	0.130552	Up	40.494	22.4884	15.2453	148.475	156.342	59.1933	SDT1		GO:0016787	hydrolase activity
1468	TraesCS3A02G531300	1271.87	466.167	2077.58	4.45672	2.15598	0.00246372	0.0346352	Up	46.9247	48.017	84.8826	218.008	244.357	303.283	MT2C		GO:0046872	metal ion binding
1469	TraesCS1D02G090900	529.496	194.026	864.966	4.458	2.1564	0.045494	0.241728	Up	6.50449	4.86695	4.2048	28.1268	21.4639	11.141	SUN2		GO:0016021	integral component of membrane
1470	TraesCS5D02G445000	699.498	256.319	1142.68	4.45803	2.1564	0.0167343	0.127652	Up	16.2656	13.4026	14.8343	85.8826	77.2464	39.4293	LFG2		GO:0016021	integral component of membrane
1471	TraesCS3D02G543400	1029.3	377.051	1681.55	4.45973	2.15696	0.0482884	0.250537	Up	5.06612	4.00917	4.56226	22.8109	17.5587	8.95993	SIZ1		GO:0005634,GO:0008270,GO:0019789,GO:0031668	nucleus|zinc ion binding|SUMO transferase activity|cellular response to extracellular stimulus
1472	TraesCS3D02G223500	40.6966	14.9068	66.4865	4.46014	2.15709	0.0257562	0.169862	Up	0.420291	0.429348	0.566393	3.02483	2.89004	1.13817	SNL6		GO:0003824,GO:0050662,GO:0042742,GO:0009809	catalytic activity|coenzyme binding|defense response to bacterium|lignin biosynthetic process
1473	TraesCS6D02G362400	68.5091	25.0942	111.924	4.46015	2.15709	0.0093415	0.0863868	Up	1.26761	1.31757	0.94865	6.36062	4.06348	5.26815	ABCI19		GO:0005524,GO:0016887	ATP binding|ATPase activity	ko03018	RNA degradation
1474	TraesCS3B02G224800	410.942	150.517	671.367	4.46041	2.15718	0.00658011	0.0682666	Up	12.8838	9.12907	13.2068	55.1174	45.567	42.6414	VHA-F	V-type proton ATPase subunit F [Source:UniProtKB/TrEMBL;Acc:B2B9T8]	GO:0015991,GO:0033180,GO:0046961,GO:0006811,GO:1902600,GO:0034220	GO_0015991|proton-transporting V-type ATPase, V1 domain|proton-transporting ATPase activity, rotational mechanism|ion transport|proton transmembrane transport|ion transmembrane transport	ko04145,ko00190,ko04150	Phagosome|Oxidative phosphorylation|mTOR signaling pathway
1475	TraesCS6D02G358100	515.123	188.648	841.598	4.46121	2.15744	0.00328422	0.0422138	Up	10.3702	7.402	8.79494	37.3833	39.8161	48.7524	PKS6		GO:0016491,GO:0055114	oxidoreductase activity|oxidation-reduction process
1476	TraesCS4A02G190100	431.51	157.989	705.03	4.46252	2.15786	0.0128438	0.106769	Up	5.24432	4.33292	4.53961	26.0924	21.8942	12.6883	ARAD1		GO:0006486,GO:0016757	protein glycosylation|transferase activity, transferring glycosyl groups
1477	TraesCS4B02G174100	541.046	198.056	884.037	4.46357	2.1582	0.0372577	0.213313	Up	14.7714	8.50122	3.90379	49.6833	43.953	20.2731	Os03g0326500		GO:0045454,GO:0005623	cell redox homeostasis|cell
1478	TraesCS2A02G523100	269.928	98.7879	441.069	4.46481	2.1586	0.0160735	0.124087	Up	3.9425	2.37381	2.55914	7.58966	23.0386	10.0409
1479	TraesCS2A02G139600	15.1342	5.53529	24.7331	4.46825	2.15971	0.0350377	0.205115	Up	0.121094	0.0923851	0.225956	0.55767	1.23332	0.662973	GATL4	Hexosyltransferase [Source:UniProtKB/TrEMBL;Acc:A0A1D5TRD6]	GO:0016757	transferase activity, transferring glycosyl groups
1480	TraesCSU02G123300	84.0003	30.7183	137.282	4.46907	2.15998	0.0133861	0.10983	Up	1.43186	0.447297	0.384825	3.37723	3.75504	2.34781			GO:0016491	oxidoreductase activity
1481	TraesCS4D02G259900	74.0654	27.0792	121.052	4.47029	2.16037	0.0130513	0.107867	Up	1.6487	1.19832	0.90556	7.83061	5.58866	4.59995			GO:0016021	integral component of membrane
1482	TraesCS2A02G493800	122.05	44.6186	199.482	4.47081	2.16054	0.00578121	0.062354	Up	2.71953	1.36183	0.408733	4.99516	7.72856	6.5911			GO:0005524,GO:0004672,GO:0004674,GO:0006468,GO:0000166,GO:0016301,GO:0016310,GO:0016740	ATP binding|protein kinase activity|protein serine/threonine kinase activity|protein phosphorylation|nucleotide binding|kinase activity|phosphorylation|transferase activity	ko04075	Plant hormone signal transduction
1483	TraesCS7B02G144000	46.1926	16.8835	75.5017	4.47192	2.1609	0.0399438	0.222954	Up	0.874198	0.432735	0.366301	3.12505	2.89595	1.19779	At5g47430		GO:0003676,GO:0008270,GO:0016567,GO:0061630,GO:0006397	nucleic acid binding|zinc ion binding|protein ubiquitination|ubiquitin protein ligase activity|mRNA processing
1484	TraesCS4D02G104900	445.18	162.651	727.709	4.47405	2.16158	0.00670846	0.0691066	Up	5.65767	5.86722	6.06036	26.0055	28.5735	19.7253	IDI2	Methylthioribose-1-phosphate isomerase [Source:UniProtKB/TrEMBL;Acc:A0A1D5Y5L9]	GO:0005737,GO:0005634,GO:0044237,GO:0046523,GO:0019509,GO:0019284,GO:0071281,GO:0071732,GO:0071369,GO:0009506,GO:0044249	cytoplasm|nucleus|cellular metabolic process|S-methyl-5-thioribose-1-phosphate isomerase activity|L-methionine salvage from methylthioadenosine|L-methionine salvage from S-adenosylmethionine|cellular response to iron ion|cellular response to nitric oxide|cellular response to ethylene stimulus|plasmodesma|cellular biosynthetic process	ko00270	Cysteine and methionine metabolism
1485	TraesCS7A02G269800	443.177	161.88	724.475	4.47538	2.16201	0.0195658	0.141196	Up	3.15353	3.17683	3.33569	16.2589	13.4967	8.52051	PUX8		GO:0005515	protein binding
1486	TraesCS2A02G303200	66.1825	24.168	108.197	4.47687	2.16249	0.0428138	0.232857	Up	1.17607	0.697973	0.472332	3.85315	3.61306	1.85727	Os04g0430800		GO:0015035,GO:0045454,GO:0006662,GO:0005623	protein disulfide oxidoreductase activity|cell redox homeostasis|glycerol ether metabolic process|cell
1487	TraesCS2B02G594100	28.9449	10.5698	47.32	4.47689	2.1625	0.0353964	0.206403	Up	0.198822	0.295235	0.229819	0.994873	1.56721	0.446031	CRPK1		GO:0005524,GO:0004672,GO:0004674,GO:0006468	ATP binding|protein kinase activity|protein serine/threonine kinase activity|protein phosphorylation
1488	TraesCS3B02G601100	488.724	178.463	798.986	4.47704	2.16255	0.00291491	0.0388831	Up	32.4218	27.8976	31.8	116.534	158.665	151.502	MT2C		GO:0046872	metal ion binding
1489	TraesCS3B02G034100	81.7011	29.8338	133.568	4.47708	2.16256	0.00403692	0.0485758	Up	1.54748	0.962734	0.290822	3.72454	2.49706	5.49473	HIPP37		GO:0046872,GO:0030001	metal ion binding|metal ion transport
1490	TraesCS7B02G306100	102.863	37.5476	168.178	4.47908	2.1632	0.031069	0.190348	Up	1.42187	0.562035	1.43495	5.00226	3.84879	2.00526	LPEAT2		GO:0005509,GO:0016746,GO:0006644,GO:0071618,GO:0050200,GO:0000038	calcium ion binding|transferase activity, transferring acyl groups|phospholipid metabolic process|lysophosphatidylethanolamine acyltransferase activity|plasmalogen synthase activity|very long-chain fatty acid metabolic process	ko00564,ko00565	Glycerophospholipid metabolism|Ether lipid metabolism
1491	TraesCS4B02G104700	542.383	197.97	886.796	4.47946	2.16332	0.026826	0.173893	Up	5.30727	4.89871	6.26587	29.559	23.1605	12.7652	NINJA1		GO:0007165	signal transduction
1492	TraesCS1B02G106900	130.127	47.492	212.762	4.47995	2.16348	0.00981581	0.0889754	Up	0.081358	0.525834	0.61402	2.28082	1.9503	1.28743	CHR12		GO:0005524,GO:0042393	ATP binding|histone binding
1493	TraesCS2A02G306100	30.6532	11.1865	50.1199	4.48039	2.16363	0.019682	0.141716	Up	0.765142	0.504223	0.459952	1.81775	3.02218	1.90518	TCHQD		GO:0005886,GO:0005515	plasma membrane|protein binding
1494	TraesCS1D02G020700	34.2728	12.5072	56.0384	4.48049	2.16366	0.0241098	0.162033	Up	0.310133	0.476487	0.811607	2.52502	4.90046	1.41119	3MAT		GO:0016747	transferase activity, transferring acyl groups other than amino-acyl groups
1495	TraesCS1A02G422800	8.62996	3.14831	14.1116	4.48229	2.16424	0.0485034	0.251167	Up	0.165577	0.060534	0	0.150201	0.248016	0.572097	CRK6		GO:0016021,GO:0005524,GO:0004672,GO:0006468	integral component of membrane|ATP binding|protein kinase activity|protein phosphorylation
1496	TraesCS1D02G383700	78.139	28.4894	127.788	4.48547	2.16526	0.0135761	0.110902	Up	0.569975	0.43605	0.618601	1.88175	3.51441	1.2875			GO:0010099	regulation of photomorphogenesis
1497	TraesCS6A02G255400	19.887	7.24901	32.5251	4.48683	2.1657	0.0437455	0.235805	Up	0.179132	0.083258	0.109738	0.468165	0.878792	0.304967	LHW		GO:0046983	protein dimerization activity
1498	TraesCS4B02G170700	1137.45	414.576	1860.32	4.48729	2.16584	0.049894	0.255422	Up	15.7188	9.55476	5.41507	49.7551	52.194	17.0594	ATPK2	Non-specific serine/threonine protein kinase [Source:UniProtKB/TrEMBL;Acc:A0A1D5XLN4]	GO:0005524,GO:0004672,GO:0004674,GO:0006468	ATP binding|protein kinase activity|protein serine/threonine kinase activity|protein phosphorylation	ko04066,ko04152,ko04350,ko04012,ko04151,ko04150	HIF-1 signaling pathway|AMPK signaling pathway|TGF-beta signaling pathway|ErbB signaling pathway|PI3K-Akt signaling pathway|mTOR signaling pathway
1499	TraesCS4B02G009800	17.2538	6.28783	28.2198	4.48801	2.16608	0.0418798	0.229569	Up	0.452595	0.122324	0.0710623	1.06088	1.30846	0.858961	PYRP2		GO:0016787,GO:0009231,GO:0043621,GO:0006468	hydrolase activity|riboflavin biosynthetic process|protein self-association|protein phosphorylation
[truncated: 7,084 more rows]

## Sheet: down-regulated
Table S2. Differentially expressed genes in T. foetida infected and control plants.
[truncated: 7,076 more rows]

[truncated: 1 more sheets: All]
